# Supplementary material for: Distinguishing Glioblastoma Subtypes by Methylation Signatures
Source: Front Genet. 2020 Nov 24;11:604336. doi: 10.3389/fgene.2020.604336 (PMC7732602; doi:10.3389/fgene.2020.604336)
Supplement: Supplementary Table 1 — Features ranked by MCFS. [file Table_1.XLSX]

## Sheet: Supp_S1
Rank	Feature	RI
1	cg02902079	0.582171
2	cg10824187	0.562513
3	cg22727304	0.502331
4	cg26558485	0.48038
5	cg03186339	0.430834
6	cg07028914	0.415263
7	cg26766005	0.391778
8	cg25836094	0.38759
9	cg11823511	0.3865
10	cg13383019	0.384425
11	cg06829830	0.373066
12	cg14768335	0.373046
13	cg26844246	0.368314
14	cg22304507	0.357746
15	cg15739717	0.329507
16	cg10178263	0.325779
17	cg06208339	0.317771
18	cg02106850	0.30841
19	cg09017434	0.306577
20	cg03844506	0.29843
21	cg15507776	0.285969
22	cg18280463	0.271057
23	cg15627710	0.262822
24	cg23416667	0.256196
25	cg25026529	0.245263
26	cg18984200	0.24294
27	cg20944157	0.236286
28	cg25090514	0.235435
29	cg06288154	0.23336
30	cg24605830	0.222176
31	cg02676375	0.220812
32	cg20745457	0.218784
33	cg18815943	0.20673
34	cg19099833	0.206281
35	cg02091185	0.203716
36	cg21852342	0.202982
37	cg26422161	0.188008
38	cg01071314	0.187234
39	cg10837110	0.177192
40	cg13947666	0.176037
41	cg02075296	0.175921
42	cg01154505	0.1704
43	cg21167817	0.167272
44	cg10751726	0.165575
45	cg19432505	0.165472
46	cg07803236	0.157138
47	cg26896155	0.149996
48	cg10617909	0.148033
49	cg22703659	0.145784
50	cg10907727	0.144069
51	cg10200388	0.143767
52	cg17784811	0.143586
53	cg17750254	0.142113
54	cg17533458	0.139872
55	cg12497564	0.139068
56	cg12483476	0.135775
57	cg14245471	0.133171
58	cg11671688	0.133036
59	cg18342253	0.131374
60	cg00428476	0.12959
61	cg02344943	0.126008
62	cg09848695	0.124848
63	cg21800232	0.123142
64	cg08358803	0.122146
65	cg00776782	0.116949
66	cg05539745	0.11153
67	cg26252167	0.110659
68	cg22923827	0.110265
69	cg25571189	0.110057
70	cg13724379	0.109733
71	cg17405234	0.109405
72	cg11067964	0.107785
73	cg25379026	0.106853
74	cg16608596	0.10641
75	cg05526015	0.106269
76	cg04484334	0.106035
77	cg13618936	0.104777
78	cg06213964	0.102231
79	cg11212451	0.0995537
80	cg07085827	0.0969423
81	cg26860935	0.0953325
82	cg08980237	0.0944685
83	cg19875969	0.0936769
84	cg12123671	0.0930643
85	cg27418586	0.091571
86	cg00865356	0.0905176
87	cg19446018	0.0904029
88	cg01602345	0.0898734
89	cg10445911	0.0898228
90	cg05201970	0.089505
91	cg09676860	0.0894372
92	cg10174867	0.0825991
93	cg05247112	0.0824338
94	cg23814714	0.0813939
95	cg11345323	0.0807705
96	cg05500840	0.0807367
97	cg14776114	0.0807227
98	cg20666807	0.0799161
99	cg02265318	0.079833
100	cg25720804	0.0773468
101	cg14146100	0.0772441
102	cg00603435	0.0757389
103	cg15679283	0.0741096
104	cg22167515	0.0732959
105	cg02114924	0.0692208
106	cg22865720	0.0672448
107	cg12769994	0.0668526
108	cg20529645	0.0664374
109	cg18740718	0.0660599
110	cg03699182	0.0645038
111	cg03440125	0.0640555
112	cg07995179	0.063496
113	cg01272707	0.0634049
114	cg13435432	0.0629381
115	cg04120428	0.0614263
116	cg09752264	0.060706
117	cg23036452	0.0593699
118	cg02421985	0.0592398
119	cg03605610	0.0578391
120	cg18110165	0.0569325
121	cg00613752	0.0553526
122	cg02173749	0.0551678
123	cg11423891	0.0546603
124	cg09837037	0.0529788
125	cg26072327	0.0524722
126	cg02743222	0.0518127
127	cg03969906	0.0517853
128	cg15570395	0.0509933
129	cg26554323	0.0509001
130	cg24224020	0.0505851
131	cg20216982	0.0501785
132	cg18322569	0.0501129
133	cg17918090	0.0498727
134	cg19384289	0.0497712
135	cg04075191	0.0493407
136	cg17275700	0.048642
137	cg17146473	0.0455044
138	cg04739647	0.0451626
139	cg09867230	0.0451444
140	cg25847484	0.0450754
141	cg04194947	0.0445104
142	cg15073784	0.0442524
143	cg25998402	0.0433754
144	cg02061173	0.0424156
145	cg07893921	0.0421299
146	cg03363478	0.0412592
147	cg16027728	0.0408124
148	cg02577896	0.0407953
149	cg15468976	0.0404629
150	cg24437737	0.040149
151	cg04330597	0.0400705
152	cg04747036	0.0399133
153	cg02076785	0.039886
154	cg13554744	0.039487
155	cg18622413	0.0390766
156	cg05068452	0.0388482
157	cg19809499	0.0387665
158	cg23056047	0.0387553
159	cg26399201	0.0387129
160	cg26395813	0.0383973
161	cg20492807	0.0380956
162	cg05196820	0.037543
163	cg10547893	0.0373547
164	cg04889800	0.0371066
165	cg24478803	0.0370242
166	cg23130131	0.0369607
167	cg18740893	0.0368016
168	cg15123984	0.0364619
169	cg17945153	0.0362768
170	cg21046148	0.0358321
171	cg13033070	0.0357052
172	cg16387254	0.0356993
173	cg18307783	0.0351258
174	cg02919116	0.0350758
175	cg10400707	0.0350271
176	cg04896832	0.0350186
177	cg26057751	0.0347806
178	cg04283488	0.0347683
179	cg17497419	0.0347221
180	cg09275956	0.0344703
181	cg24117063	0.0344323
182	cg14160419	0.0340089
183	cg00334063	0.0340056
184	cg26327666	0.0337348
185	cg07848601	0.0334456
186	cg08722065	0.0332163
187	cg15092343	0.0332064
188	cg03130248	0.0330251
189	cg10012722	0.0330205
190	cg12634932	0.03289
191	cg21789044	0.0325539
192	cg11361344	0.0324737
193	cg08613144	0.0324684
194	cg04076037	0.0324269
195	cg24362813	0.0323882
196	cg15105326	0.0323469
197	cg22853713	0.0321387
198	cg16227748	0.0316251
199	cg16958939	0.0309349
200	cg26894523	0.0308933
201	cg17945962	0.0307035
202	cg06500120	0.0306081
203	cg10065209	0.0305139
204	cg26886462	0.0304413
205	cg00699997	0.0300085
206	cg03695591	0.0300038
207	cg25265126	0.0297047
208	cg14426525	0.0295901
209	cg26017930	0.0294457
210	cg01940181	0.0294454
211	cg25915539	0.0293797
212	cg22900266	0.0292169
213	cg17809377	0.028926
214	cg25040670	0.0287096
215	cg09698395	0.0286267
216	cg13207326	0.0282705
217	cg06825448	0.0279622
218	cg08587845	0.0278969
219	cg23289079	0.0278398
220	cg21353189	0.0276224
221	cg17712694	0.027464
222	cg20904489	0.0273202
223	cg08802652	0.0272628
224	cg25004347	0.0267179
225	cg20435896	0.0266221
226	cg18424134	0.0265088
227	cg10864145	0.0264636
228	cg16083044	0.0264239
229	cg15203566	0.0263853
230	cg22185977	0.0263661
231	cg07181952	0.0259045
232	cg14001664	0.0258278
233	cg22070991	0.0257721
234	cg08854306	0.02567
235	cg14118059	0.0256234
236	cg14481911	0.0253637
237	cg24374583	0.0251145
238	cg05714155	0.0250145
239	cg13060970	0.0247361
240	cg17590234	0.024615
241	cg01405040	0.0243151
242	cg09873164	0.0242566
243	cg15229124	0.024205
244	cg10086659	0.0241231
245	cg18357526	0.0240681
246	cg16563454	0.0239143
247	cg08930741	0.0238997
248	cg05680111	0.0237651
249	cg00281842	0.0236051
250	cg20311863	0.0235356
251	cg09344348	0.0234433
252	cg22599115	0.0233243
253	cg21963406	0.0233186
254	cg01056467	0.0232884
255	cg20647610	0.0232642
256	cg13301423	0.0231743
257	cg14137381	0.0229504
258	cg14765933	0.022937
259	cg15929276	0.0228543
260	cg09363841	0.0227454
261	cg06627334	0.0226029
262	cg10744200	0.0225777
263	cg10616795	0.0225332
264	cg14461974	0.0224693
265	cg02892898	0.0224501
266	cg24617696	0.0224362
267	cg08920748	0.0224064
268	cg11969556	0.0223767
269	cg15457058	0.0223179
270	cg20265661	0.0223011
271	cg25513933	0.0221554
272	cg03303633	0.0221315
273	cg17680823	0.0220466
274	cg06314001	0.0220319
275	cg02517632	0.0220222
276	cg00472801	0.0219027
277	cg15320272	0.0218621
278	cg21986027	0.0215564
279	cg14473102	0.0214805
280	cg13850606	0.0213092
281	cg10664112	0.0212993
282	cg05051043	0.0212946
283	cg01650137	0.021166
284	cg07475026	0.0211093
285	cg02928797	0.0210927
286	cg18317492	0.0209727
287	cg17151621	0.0208755
288	cg01718116	0.0207151
289	cg08900233	0.0206542
290	cg22401066	0.0206444
291	cg07292251	0.020632
292	cg26333652	0.0206024
293	cg09642925	0.0205201
294	cg15722404	0.0204748
295	cg11795854	0.0204561
296	cg20367852	0.0202899
297	cg02284587	0.0202751
298	cg25653165	0.0201856
299	cg08344943	0.020185
300	cg15841063	0.020164
301	cg01971547	0.0200454
302	cg21109192	0.0200154
303	cg08879111	0.0199695
304	cg20139706	0.0198783
305	cg20146541	0.0198255
306	cg10288921	0.0197951
307	cg19300414	0.0197081
308	cg13854983	0.0195972
309	cg11372934	0.0195307
310	cg14132888	0.0194973
311	cg14532497	0.0193949
312	cg10949583	0.0192562
313	cg09652086	0.0192116
314	cg06062984	0.0192055
315	cg06802365	0.0191986
316	cg11358945	0.0191571
317	cg17397028	0.0190537
318	cg15240033	0.0190069
319	cg17636806	0.0187743
320	cg12529457	0.018668
321	cg06294561	0.0186545
322	cg26425669	0.0185985
323	cg04166042	0.0185427
324	cg23514877	0.0185343
325	cg11946503	0.0185233
326	cg09884756	0.018418
327	cg18286080	0.0183913
328	cg14647877	0.018376
329	cg16707227	0.018374
330	cg07144318	0.018361
331	cg10879116	0.0180821
332	cg03339817	0.0179202
333	cg11661250	0.0178759
334	cg24937136	0.0178341
335	cg22176994	0.0177716
336	cg12074084	0.0177016
337	cg10812186	0.0176883
338	cg23850283	0.0176546
339	cg02705759	0.0175009
340	cg25314315	0.0174987
341	cg05956076	0.017453
342	cg08209336	0.0173542
343	cg22156700	0.0173255
344	cg02567839	0.0171123
345	cg00987743	0.0170366
346	cg25976672	0.0169159
347	cg26715952	0.0168383
348	cg02453726	0.0167757
349	cg11669516	0.0167289
350	cg14434870	0.0167243
351	cg01691194	0.0165713
352	cg19731194	0.0165566
353	cg15197065	0.0164769
354	cg01748414	0.0164407
355	cg23093846	0.0163981
356	cg25480785	0.0163285
357	cg18134312	0.0162635
358	cg15123761	0.0161464
359	cg11418389	0.0161169
360	cg01125214	0.0161095
361	cg03892838	0.0160363
362	cg13808325	0.0160305
363	cg18199554	0.0160238
364	cg22117825	0.0159251
365	cg05302825	0.0158844
366	cg07529754	0.0157697
367	cg02920218	0.0157546
368	cg08522426	0.0156751
369	cg24173584	0.015664
370	cg05835105	0.0155434
371	cg20471413	0.0155419
372	cg21198550	0.015476
373	cg21141143	0.0153737
374	cg27642784	0.0153428
375	cg26024624	0.0153367
376	cg03335262	0.015303
377	cg25155253	0.0152134
378	cg02402214	0.0151889
379	cg14016676	0.0151667
380	cg22107710	0.0151607
381	cg22131825	0.015152
382	cg08813888	0.0151508
383	cg19599827	0.0151451
384	cg20701531	0.0151418
385	cg05139709	0.0150537
386	cg20263392	0.0149382
387	cg15494117	0.0149151
388	cg08857994	0.0149019
389	cg13064679	0.0148138
390	cg04541368	0.0147206
391	cg21786227	0.0147185
392	cg00050152	0.0146568
393	cg14602530	0.01461
394	cg04305319	0.0146017
395	cg12178431	0.0145961
396	cg03977831	0.01452
397	cg03976543	0.0145163
398	cg12552261	0.0144737
399	cg19593680	0.0143623
400	cg08146483	0.0143147
401	cg10707788	0.0142851
402	cg13101767	0.0142246
403	cg20848924	0.0141376
404	cg10243004	0.0141224
405	cg07649491	0.0141072
406	cg23054189	0.014009
407	cg22817650	0.0139721
408	cg02430347	0.0139287
409	cg10963218	0.0139244
410	cg01174743	0.0139008
411	cg09259037	0.0138333
412	cg17527574	0.0137871
413	cg22160662	0.013744
414	cg09842161	0.0136333
415	cg20506745	0.0136248
416	cg20731257	0.013595
417	cg27622506	0.0134477
418	cg05903444	0.0134092
419	cg11237215	0.0133818
420	cg21824017	0.013356
421	cg22511877	0.0133026
422	cg21129181	0.0132452
423	cg22406334	0.0132357
424	cg04453180	0.0131185
425	cg01063413	0.0130598
426	cg25460753	0.0130438
427	cg21395198	0.0130367
428	cg23851558	0.0130282
429	cg26022183	0.0129439
430	cg18204091	0.0129313
431	cg04209911	0.0129069
432	cg16240162	0.0129067
433	cg15599946	0.0128459
434	cg04287574	0.0128445
435	cg24633978	0.0128223
436	cg12311057	0.0127314
437	cg25439496	0.0127153
438	cg16674351	0.012674
439	cg13197521	0.0126161
440	cg24718971	0.0126118
441	cg03287469	0.0125757
442	cg16855817	0.0125668
443	cg08929133	0.0124423
444	cg18279094	0.0124407
445	cg16701523	0.0124128
446	cg10775230	0.0124097
447	cg10564791	0.0124014
448	cg09251600	0.0123899
449	cg18667659	0.0123257
450	cg17032565	0.0123227
451	cg11406216	0.0122766
452	cg16867657	0.012206
453	cg17303756	0.0122044
454	cg05542957	0.0121868
455	cg04311722	0.0121709
456	cg19372975	0.0120825
457	cg06879394	0.0120792
458	cg26266427	0.0120792
459	cg02594410	0.012019
460	cg15961693	0.0120003
461	cg00326131	0.0119987
462	cg26560020	0.0119763
463	cg21929183	0.011951
464	cg21697252	0.011944
465	cg13632070	0.0119074
466	cg11697194	0.0118532
467	cg20255817	0.0118257
468	cg16108230	0.011823
469	cg05273429	0.0117916
470	cg23266594	0.0117386
471	cg00799121	0.0117155
472	cg04471779	0.0117143
473	cg21608500	0.011688
474	cg22614239	0.0116669
475	cg14559212	0.0116167
476	cg07574896	0.011604
477	cg04309194	0.0115892
478	cg17732597	0.0115658
479	cg14969094	0.0115506
480	cg05547562	0.0115276
481	cg03656055	0.0115128
482	cg10301879	0.0114382
483	cg14583973	0.0114295
484	cg20681783	0.0114114
485	cg16545749	0.0114094
486	cg15165927	0.0113851
487	cg25215835	0.0112806
488	cg13597051	0.0112051
489	cg15760474	0.0112049
490	cg22490780	0.0111771
491	cg09563922	0.0111749
492	cg07798137	0.011129
493	cg22196848	0.0111172
494	cg24179734	0.0111115
495	cg00233079	0.0110999
496	cg27218796	0.0110968
497	cg01594675	0.0110953
498	cg06802641	0.0110865
499	cg15551687	0.011086
500	cg23352712	0.0110784
501	cg08013557	0.0109147
502	cg17640485	0.0109142
503	cg12457721	0.0109125
504	cg04014105	0.0108299
505	cg25940827	0.0108152
506	cg26464889	0.0108064
507	cg08573270	0.0108009
508	cg20331241	0.0107872
509	cg05821633	0.010762
510	cg11226901	0.0107137
511	cg07852840	0.0107071
512	cg03964958	0.0107042
513	cg01242196	0.0107021
514	cg20894884	0.0106993
515	cg01231141	0.0106904
516	cg05499376	0.0106786
517	cg10645314	0.0105822
518	cg12436568	0.0105701
519	cg06441514	0.0105678
520	cg12150111	0.010561
521	cg10501210	0.0105368
522	cg06554120	0.0105192
523	cg10055501	0.0104224
524	cg26793354	0.0104065
525	cg03113916	0.0103877
526	cg06444282	0.0103703
527	cg27508545	0.0103605
528	cg14669379	0.0103274
529	cg20391764	0.0103217
530	cg27165836	0.0103197
531	cg13133961	0.010315
532	cg11658970	0.0103057
533	cg18803104	0.0103006
534	cg26418690	0.0101401
535	cg11205173	0.010129
536	cg15121420	0.0101276
537	cg20106601	0.0101156
538	cg16150752	0.0100944
539	cg17631972	0.0100746
540	cg06008926	0.0100665
541	cg25761793	0.0100562
542	cg05528975	0.0100489
543	cg18072802	0.0100277
544	cg16798252	0.0100168
545	cg21213973	0.00998838
546	cg02086094	0.00998186
547	cg16587616	0.00996205
548	cg15848031	0.00994288
549	cg26369133	0.00993761
550	cg26038649	0.00993085
551	cg02071418	0.0098847
552	cg00661438	0.00985599
553	cg25203031	0.00984242
554	cg24347994	0.00982517
555	cg03784611	0.00978143
556	cg17344516	0.00977796
557	cg20925841	0.00976962
558	cg09657265	0.00973812
559	cg06087349	0.00973377
560	cg15775218	0.00972254
561	cg11566394	0.00971021
562	cg14056738	0.00970877
563	cg10948883	0.00969987
564	cg14529643	0.00969441
565	cg15628708	0.00963959
566	cg21610164	0.00961053
567	cg06310131	0.00952745
568	cg03832522	0.00952133
569	cg23267554	0.00951781
570	cg10269548	0.00950963
571	cg02380531	0.00948559
572	cg11503274	0.00947458
573	cg10723962	0.00944984
574	cg23339720	0.00942219
575	cg20605134	0.00940851
576	cg14574871	0.0093888
577	cg05931423	0.00937857
578	cg06782035	0.00929037
579	cg22454769	0.00928856
580	cg13486532	0.00927454
581	cg07233230	0.00926235
582	cg21533683	0.00925288
583	cg19661030	0.00921195
584	cg02637320	0.00921162
585	cg23543318	0.00920739
586	cg08034379	0.00915707
587	cg07067189	0.00914696
588	cg20284508	0.00907848
589	cg18658556	0.0090208
590	cg17290488	0.00896799
591	cg00063174	0.00892839
592	cg06955484	0.00887736
593	cg25598371	0.00883665
594	cg16411668	0.00882305
595	cg10526795	0.00879466
596	cg08521178	0.00878883
597	cg08460026	0.00877171
598	cg04515996	0.00876465
599	cg01281040	0.0087608
600	cg02740007	0.00874116
601	cg08951901	0.00873829
602	cg10402321	0.00872249
603	cg13782301	0.00871893
604	cg11253122	0.00871809
605	cg18715709	0.00868407
606	cg07222505	0.00867004
607	cg06902698	0.00862636
608	cg21870545	0.0086004
609	cg07015784	0.0085974
610	cg14157435	0.00859541
611	cg06074123	0.00857991
612	cg10550308	0.00855602
613	cg20563269	0.00855483
614	cg26157385	0.00852884
615	cg19804071	0.00852807
616	cg15714846	0.00852312
617	cg12707343	0.00847265
618	cg21050001	0.00846132
619	cg12019520	0.00845492
620	cg24768999	0.0084419
621	cg20683802	0.0084272
622	cg15808943	0.00839561
623	cg13280041	0.00838045
624	cg17235833	0.00837537
625	cg00071984	0.00836241
626	cg11724750	0.00835756
627	cg25086501	0.00835741
628	cg15527168	0.00835569
629	cg11419111	0.00835531
630	cg04233421	0.00834591
631	cg14437551	0.00832378
632	cg04003871	0.00831974
633	cg21189019	0.00831477
634	cg08105471	0.00830799
635	cg18851795	0.0083035
636	cg09361488	0.00829824
637	cg21048930	0.00827512
638	cg18758585	0.00827394
639	cg03287616	0.00826126
640	cg08184652	0.00825905
641	cg10985347	0.00825786
642	cg24055029	0.00825517
643	cg20257553	0.00824273
644	cg12332674	0.00823115
645	cg19798881	0.00820371
646	cg11580676	0.00819744
647	cg22777513	0.0081595
648	cg23191576	0.00815591
649	cg01849401	0.00813902
650	cg11615607	0.00813399
651	cg14539675	0.00812983
652	cg15982535	0.00811283
653	cg06936155	0.00810678
654	cg21399510	0.00810642
655	cg15447913	0.00805119
656	cg01886385	0.00804733
657	cg08355260	0.00804087
658	cg08709360	0.00804069
659	cg20427090	0.00804043
660	cg04726702	0.00802319
661	cg06959626	0.00800849
662	cg21538208	0.00800647
663	cg17623793	0.00795258
664	cg13098071	0.00794764
665	cg20853880	0.00794253
666	cg25754958	0.00793157
667	cg26277787	0.00791638
668	cg18236358	0.00789501
669	cg20290360	0.00782448
670	cg08708229	0.00780855
671	cg23192683	0.00780474
672	cg23547017	0.0077988
673	cg26917828	0.00779198
674	cg19053239	0.00779022
675	cg11823253	0.00777772
676	cg03119829	0.00775891
677	cg02470871	0.00775825
678	cg11754914	0.00775686
679	cg19506623	0.00774268
680	cg11488350	0.00773309
681	cg24854181	0.0077177
682	cg09655403	0.00771734
683	cg15732840	0.00771572
684	cg26816438	0.00771546
685	cg25339566	0.00771398
686	cg06650379	0.00769301
687	cg26517171	0.00765998
688	cg09601912	0.00765882
689	cg00678709	0.00764683
690	cg11557932	0.00763795
691	cg12151443	0.00763654
692	cg18272703	0.0076327
693	cg11883836	0.00762777
694	cg10507482	0.00761735
695	cg08729434	0.00761669
696	cg04216051	0.00761035
697	cg04748223	0.00760467
698	cg13138089	0.00760305
699	cg10177394	0.00759979
700	cg26038582	0.00759801
701	cg17875922	0.00758534
702	cg05017994	0.00758124
703	cg23279355	0.00756841
704	cg08702941	0.00756363
705	cg22112075	0.00755691
706	cg15153118	0.00754236
707	cg01587896	0.00752815
708	cg02633761	0.00752797
709	cg01138867	0.00751944
710	cg10441628	0.00751874
711	cg01141445	0.00751299
712	cg12453014	0.00751032
713	cg03718241	0.00748188
714	cg21144922	0.00747699
715	cg26365545	0.00747504
716	cg00563824	0.00746644
717	cg15575375	0.00746143
718	cg12141340	0.00745805
719	cg12138286	0.00745231
720	cg22720392	0.00743872
721	cg04501188	0.00742508
722	cg05152781	0.00740063
723	cg12456280	0.0073756
724	cg00831909	0.0073525
725	cg05996538	0.00734663
726	cg15035459	0.00734491
727	cg14180916	0.00734017
728	cg16704344	0.00733443
729	cg20971488	0.00731429
730	cg08285730	0.00729809
731	cg10754215	0.0072898
732	cg01561304	0.00728382
733	cg05636047	0.00728045
734	cg05921170	0.00727683
735	cg07952381	0.00727447
736	cg12276123	0.00727105
737	cg08126875	0.00726408
738	cg11800635	0.0072068
739	cg06410537	0.00720529
740	cg03037622	0.00720197
741	cg00964103	0.00718841
742	cg03768925	0.0071865
743	cg04846348	0.0071814
744	cg14354168	0.00717409
745	cg00107916	0.0071517
746	cg03596635	0.00714992
747	cg10104810	0.00714593
748	cg17598713	0.0071334
749	cg01970427	0.0071217
750	cg25597894	0.00712154
751	cg15402210	0.00708488
752	cg05167251	0.00707928
753	cg05200037	0.00703416
754	cg00162191	0.00702006
755	cg24514884	0.00700739
756	cg09749225	0.00698663
757	cg01045723	0.00698344
758	cg12654519	0.00698265
759	cg05155840	0.00697584
760	cg04154027	0.00696174
761	cg17449954	0.00692938
762	cg23036508	0.00692067
763	cg23620822	0.00690323
764	cg23359276	0.00689809
765	cg20489026	0.00689057
766	cg06163701	0.00688199
767	cg17477273	0.00687426
768	cg16823064	0.00687187
769	cg19678564	0.00687027
770	cg11508406	0.00686183
771	cg04167239	0.00685945
772	cg15915602	0.00684064
773	cg25078649	0.0068398
774	cg21946299	0.00683558
775	cg15922080	0.00682695
776	cg02294758	0.00681724
777	cg17025620	0.0068028
778	cg19419291	0.00679675
779	cg04971401	0.00679503
780	cg24441810	0.00678524
781	cg11223747	0.00678038
782	cg10962577	0.00677403
783	cg20784693	0.00676147
784	cg05890243	0.00676096
785	cg19112357	0.00674584
786	cg16918905	0.00674372
787	cg07017998	0.0067392
788	cg20181739	0.00673745
789	cg05223396	0.00672762
790	cg11902539	0.00672241
791	cg04658027	0.00671265
792	cg14875327	0.00671188
793	cg25280041	0.00670665
794	cg04159903	0.00668849
795	cg05877648	0.00668763
796	cg09810078	0.00666912
797	cg05613063	0.00664507
798	cg23899450	0.00664283
799	cg09054633	0.00662897
800	cg24059022	0.00662758
801	cg24880818	0.00662207
802	cg00512454	0.00661997
803	cg16643169	0.0065868
804	cg07451391	0.00658541
805	cg21918313	0.00657836
806	cg17491368	0.00656719
807	cg12581547	0.00656493
808	cg02841227	0.00656187
809	cg04295117	0.00655056
810	cg12835012	0.00654978
811	cg15111629	0.00654372
812	cg07702693	0.00653025
813	cg13394216	0.00652841
814	cg02279224	0.00652702
815	cg19052272	0.00652314
816	cg20041567	0.00651204
817	cg02187231	0.00650097
818	cg15812753	0.00649775
819	cg02773086	0.0064906
820	cg15856832	0.00648938
821	cg13323489	0.0064821
822	cg25852273	0.00647549
823	cg22533517	0.00647024
824	cg21854408	0.00646849
825	cg06059056	0.00646765
826	cg03754582	0.00646528
827	cg20563910	0.00646426
828	cg08843537	0.00645273
829	cg08299809	0.0064394
830	cg02818160	0.00643675
831	cg13026730	0.00643094
832	cg26926138	0.00642319
833	cg22810515	0.00641199
834	cg26649384	0.00640523
835	cg06659073	0.00639874
836	cg04888849	0.00639202
837	cg22160448	0.00638982
838	cg21980338	0.00638502
839	cg14203970	0.0063817
840	cg03127034	0.00637824
841	cg06599209	0.00637624
842	cg15906761	0.00636506
843	cg08330404	0.00635921
844	cg18402034	0.00634425
845	cg25164490	0.00633895
846	cg27036376	0.00633775
847	cg02722672	0.00633229
848	cg07015256	0.0063269
849	cg19364929	0.00632676
850	cg10717691	0.00632348
851	cg08493959	0.00631905
852	cg10961323	0.00631819
853	cg00997280	0.00631302
854	cg15029475	0.00630307
855	cg27351619	0.00629816
856	cg10546048	0.00629639
857	cg03538480	0.00629164
858	cg19403541	0.00628826
859	cg08652487	0.00628823
860	cg15101980	0.00628299
861	cg01971224	0.00628051
862	cg12976108	0.00627342
863	cg15666214	0.00626384
864	cg12694372	0.00625964
865	cg12813724	0.00625858
866	cg16240755	0.00625785
867	cg19125791	0.00625569
868	cg26682955	0.00625135
869	cg04754315	0.00624785
870	cg00094734	0.00623938
871	cg26099134	0.00623805
872	cg11646734	0.00623118
873	cg13954457	0.0062244
874	cg06118384	0.00620595
875	cg08814736	0.00620443
876	cg05271121	0.00620167
877	cg20348298	0.00620157
878	cg13719287	0.00620069
879	cg19846040	0.00618029
880	cg09067559	0.0061783
881	cg17949969	0.00617378
882	cg21109485	0.00615426
883	cg25237894	0.00612909
884	cg05956462	0.0061255
885	cg01142353	0.0061218
886	cg21510194	0.00611813
887	cg12201943	0.00611675
888	cg15694422	0.00610998
889	cg01294808	0.00610229
890	cg00445126	0.00609845
891	cg16575025	0.00609533
892	cg17742293	0.0060938
893	cg10336578	0.00609074
894	cg04836714	0.00609058
895	cg07262247	0.00608467
896	cg08162476	0.0060798
897	cg15396800	0.0060787
898	cg14053639	0.00606676
899	cg13073141	0.00606451
900	cg18648037	0.00606331
901	cg18022927	0.00605783
902	cg20812153	0.00605377
903	cg23983726	0.00605308
904	cg19271111	0.00604881
905	cg02192490	0.00604142
906	cg13371870	0.0060401
907	cg07197785	0.00603518
908	cg07448606	0.00602806
909	cg07163991	0.00602083
910	cg10975897	0.00601763
911	cg18634709	0.00601195
912	cg23218473	0.00600916
913	cg17266282	0.00599961
914	cg22149610	0.0059974
915	cg27096298	0.00598496
916	cg26337070	0.00597606
917	cg08073009	0.00597088
918	cg05660803	0.00596106
919	cg24159435	0.00595823
920	cg05543456	0.00595437
921	cg17218713	0.00595033
922	cg09787089	0.00591954
923	cg26468478	0.00591539
924	cg14453187	0.00590752
925	cg06818851	0.0058995
926	cg16768018	0.00588937
927	cg18711394	0.00588311
928	cg26446499	0.00587956
929	cg16478197	0.00587928
930	cg14102731	0.00587173
931	cg10811045	0.00587123
932	cg04410003	0.00587109
933	cg14935163	0.00586416
934	cg25669593	0.00586023
935	cg19529823	0.00585842
936	cg06418131	0.00584734
937	cg06962177	0.0058176
938	cg18316500	0.00581706
939	cg16114141	0.00579845
940	cg20431191	0.00579429
941	cg01248080	0.00579017
942	cg19928739	0.00576554
943	cg03804609	0.00575806
944	cg12655375	0.00575376
945	cg00175838	0.00574945
946	cg02338271	0.00574914
947	cg08690859	0.0057452
948	cg00302521	0.00570887
949	cg24336989	0.00570887
950	cg12195620	0.005701
951	cg04595446	0.0056977
952	cg12213680	0.00569687
953	cg00078221	0.00569639
954	cg19878214	0.00569237
955	cg17808634	0.00569067
956	cg11496630	0.00568838
957	cg13878066	0.00568832
958	cg23222057	0.00567771
959	cg22964926	0.00565637
960	cg24851370	0.0056521
961	cg25726077	0.00564856
962	cg07363137	0.00563446
963	cg22242842	0.00562788
964	cg24162965	0.00560994
965	cg07294785	0.00557623
966	cg04731518	0.0055716
967	cg20373544	0.00556346
968	cg16369482	0.00554704
969	cg26703456	0.0055446
970	cg03329755	0.00554458
971	cg24043628	0.00554326
972	cg03282686	0.00554202
973	cg15157455	0.00552837
974	cg10955566	0.00552618
975	cg21083023	0.00552396
976	cg27078812	0.00552302
977	cg08453194	0.00551475
978	cg22954978	0.00548739
979	cg10726475	0.00547783
980	cg05676441	0.00546578
981	cg15319528	0.00546537
982	cg15829056	0.00545559
983	cg01565291	0.00544811
984	cg26312807	0.00544102
985	cg05278650	0.00543324
986	cg06500852	0.00543259
987	cg24923516	0.00543201
988	cg11983992	0.00542691
989	cg17054879	0.00542619
990	cg10190055	0.00542054
991	cg07679370	0.00540419
992	cg02513202	0.00539565
993	cg20473374	0.00537898
994	cg02972793	0.00536845
995	cg10700634	0.00536373
996	cg05544413	0.00535128
997	cg15628917	0.00533945
998	cg14410016	0.00532606
999	cg23829024	0.0053237
1000	cg09173768	0.00532342
1001	cg05790982	0.00531757
1002	cg09251680	0.0052994
1003	cg04088289	0.00529132
1004	cg20032934	0.00528793
1005	cg05911136	0.00528713
1006	cg08593261	0.0052832
1007	cg05310764	0.00528039
1008	cg07836663	0.00528024
1009	cg24460126	0.00527191
1010	cg10733080	0.00525704
1011	cg21877201	0.00525654
1012	cg21063722	0.00525431
1013	cg27323154	0.00522163
1014	cg27132966	0.00521071
1015	cg22361816	0.00521066
1016	cg21873275	0.00519064
1017	cg07786258	0.00518793
1018	cg05876591	0.00518094
1019	cg12252866	0.00517515
1020	cg24771349	0.00517104
1021	cg06321045	0.00516911
1022	cg22432982	0.00516797
1023	cg10503083	0.00515418
1024	cg21647189	0.00514677
1025	cg18942934	0.00513401
1026	cg14296274	0.00513025
1027	cg01968402	0.00512904
1028	cg01910419	0.0051285
1029	cg07902749	0.0051155
1030	cg25775494	0.00510224
1031	cg12206199	0.00510161
1032	cg24124753	0.00510081
1033	cg16527939	0.00509747
1034	cg14661803	0.00509368
1035	cg13192013	0.00509037
1036	cg15825127	0.00508236
1037	cg10812708	0.00508005
1038	cg23940612	0.00507241
1039	cg06860618	0.00506925
1040	cg11222217	0.00506908
1041	cg22179510	0.00506666
1042	cg22907065	0.00506548
1043	cg06854015	0.00505697
1044	cg13246235	0.00505256
1045	cg12519676	0.00504826
1046	cg02463029	0.00504177
1047	cg27056742	0.00503896
1048	cg15993652	0.00502829
1049	cg09218398	0.00502696
1050	cg18064852	0.00502486
1051	cg00969731	0.00502286
1052	cg09059670	0.00502141
1053	cg13401893	0.00500146
1054	cg00073794	0.0049917
1055	cg16122796	0.00498356
1056	cg18172135	0.0049753
1057	cg26548293	0.00497322
1058	cg01708273	0.00497241
1059	cg26248091	0.00496513
1060	cg16348470	0.00496424
1061	cg19666256	0.00495697
1062	cg08634157	0.00494623
1063	cg00981837	0.00494384
1064	cg27169860	0.00494366
1065	cg18745913	0.00494352
1066	cg12478651	0.00494312
1067	cg10124710	0.004941
1068	cg03348461	0.00493017
1069	cg01578875	0.00492654
1070	cg10072168	0.00492569
1071	cg23097402	0.00492545
1072	cg20591353	0.00492315
1073	cg14981532	0.00491644
1074	cg14218838	0.00491301
1075	cg24327542	0.00490795
1076	cg25941985	0.00490035
1077	cg10748086	0.00488507
1078	cg02365862	0.00487169
1079	cg01239922	0.00487073
1080	cg27050057	0.00486624
1081	cg24816460	0.00485687
1082	cg02988312	0.00484088
1083	cg27177841	0.00483958
1084	cg09352372	0.00483715
1085	cg18062721	0.00481968
1086	cg12836959	0.00481881
1087	cg08414108	0.00481513
1088	cg07850967	0.00481436
1089	cg06970370	0.00480396
1090	cg13224852	0.00480113
1091	cg05298677	0.00479359
1092	cg07533148	0.00477763
1093	cg26233230	0.00477584
1094	cg07276534	0.00476972
1095	cg15393025	0.00476472
1096	cg09555617	0.00475889
1097	cg08258782	0.00475237
1098	cg12226453	0.00474383
1099	cg12338417	0.0047361
1100	cg16425726	0.00472375
1101	cg21937377	0.00471858
1102	cg18232313	0.00471429
1103	cg19739468	0.00469913
1104	cg03517147	0.00469674
1105	cg03217587	0.00468701
1106	cg02080857	0.00468478
1107	cg26418147	0.00466835
1108	cg03662049	0.00466539
1109	cg25844211	0.00466373
1110	cg00060320	0.00466188
1111	cg24744430	0.0046576
1112	cg26091021	0.00465711
1113	cg04314247	0.0046558
1114	cg22397446	0.0046548
1115	cg00290994	0.0046498
1116	cg07122553	0.00464211
1117	cg05703112	0.00463178
1118	cg11039614	0.00462699
1119	cg03064626	0.0046202
1120	cg03075534	0.00461088
1121	cg25574672	0.00460281
1122	cg04628692	0.00460106
1123	cg03670369	0.00460074
1124	cg05224659	0.0045875
1125	cg26275242	0.00458069
1126	cg26489368	0.00457798
1127	cg18009322	0.00457612
1128	cg21884064	0.00457323
1129	cg23546474	0.00456891
1130	cg16521454	0.0045685
1131	cg24625136	0.00454509
1132	cg15585318	0.00453828
1133	cg17438030	0.00453711
1134	cg12196367	0.00453176
1135	cg18154493	0.00451999
1136	cg11271346	0.00451785
1137	cg14142007	0.00451737
1138	cg23223742	0.00451448
1139	cg24704476	0.00450738
1140	cg07519536	0.00450406
1141	cg19597318	0.00450183
1142	cg17322655	0.00449846
1143	cg15727009	0.0044949
1144	cg20428033	0.00449434
1145	cg09452751	0.00449228
1146	cg19808205	0.00448955
1147	cg20148850	0.00448514
1148	cg04886221	0.00448501
1149	cg19639065	0.00447722
1150	cg22727572	0.00447533
1151	cg17207170	0.00447169
1152	cg01196322	0.00444367
1153	cg10803714	0.00443985
1154	cg24428877	0.00443603
1155	cg22698629	0.00443403
1156	cg04865265	0.00443291
1157	cg07883600	0.00443206
1158	cg02770672	0.00442727
1159	cg15556380	0.00442655
1160	cg05304005	0.00442263
1161	cg24125828	0.00441898
1162	cg01616956	0.00441427
1163	cg01573622	0.00441048
1164	cg17284804	0.00440732
1165	cg01143547	0.00439977
1166	cg03352287	0.00439774
1167	cg01732538	0.00439738
1168	cg05845831	0.00439674
1169	cg04316624	0.00439395
1170	cg12535642	0.00438544
1171	cg11354105	0.00437859
1172	cg24708145	0.00437784
1173	cg06951565	0.00437498
1174	cg05090759	0.00437488
1175	cg00034336	0.00437006
1176	cg14094639	0.00436556
1177	cg25803107	0.00436436
1178	cg06304401	0.00435534
1179	cg01441387	0.00435477
1180	cg16899920	0.00434942
1181	cg26789922	0.00433679
1182	cg13367756	0.00433641
1183	cg00028211	0.00433316
1184	cg16636054	0.00433177
1185	cg25953789	0.00433142
1186	cg09221482	0.00433065
1187	cg25746499	0.00432181
1188	cg24437715	0.00432134
1189	cg12212336	0.00432131
1190	cg14022873	0.00431898
1191	cg05116002	0.004316
1192	cg25612428	0.0043156
1193	cg20926183	0.00430519
1194	cg03605284	0.00430039
1195	cg22117062	0.00430024
1196	cg14766621	0.00429517
1197	cg16318053	0.00429051
1198	cg02480522	0.00428755
1199	cg19628225	0.00428361
1200	cg02863594	0.00427904
1201	cg14750948	0.00427783
1202	cg02841482	0.00426749
1203	cg27527108	0.00426342
1204	cg09621572	0.00426074
1205	cg22618405	0.00425729
1206	cg13829419	0.00425445
1207	cg17969853	0.0042537
1208	cg05447100	0.00425228
1209	cg06784991	0.00424345
1210	cg04210254	0.00424305
1211	cg06904408	0.00424187
1212	cg08494133	0.00424089
1213	cg27301092	0.00423392
1214	cg11905824	0.00422133
1215	cg18663325	0.00421147
1216	cg15479387	0.00420935
1217	cg25334934	0.00420882
1218	cg25283465	0.00419046
1219	cg26189035	0.00418556
1220	cg17804911	0.00418522
1221	cg20000644	0.00418489
1222	cg18096962	0.00418445
1223	cg19214222	0.00418348
1224	cg16304215	0.00418
1225	cg27349909	0.00417143
1226	cg12573791	0.00416755
1227	cg08629267	0.00415133
1228	cg18964375	0.00415112
1229	cg23482427	0.00414755
1230	cg19504089	0.00414346
1231	cg18733567	0.00413795
1232	cg22232500	0.00413605
1233	cg06177599	0.00413031
1234	cg11657043	0.00412904
1235	cg14095720	0.00412897
1236	cg04132522	0.00412561
1237	cg23207710	0.00412431
1238	cg26613586	0.00412309
1239	cg24035898	0.00411361
1240	cg13776285	0.00411325
1241	cg19624873	0.00411208
1242	cg24690231	0.00411069
1243	cg25999637	0.0041033
1244	cg21051519	0.00410067
1245	cg11649981	0.00409862
1246	cg17806162	0.00409381
1247	cg18542688	0.00409366
1248	cg25372407	0.00408963
1249	cg24276787	0.00408793
1250	cg25615081	0.00408696
1251	cg02800216	0.0040853
1252	cg19706390	0.00407635
1253	cg20682146	0.00407615
1254	cg08229018	0.0040727
1255	cg13461447	0.00406809
1256	cg01283246	0.00406129
1257	cg07171111	0.00405818
1258	cg09225691	0.00405396
1259	cg23197860	0.00405086
1260	cg05593349	0.00403809
1261	cg02400009	0.00403725
1262	cg12761728	0.00403591
1263	cg02350636	0.00403561
1264	cg00764545	0.00401673
1265	cg01265662	0.00401639
1266	cg17386213	0.0040062
1267	cg07425646	0.00400493
1268	cg23757738	0.00400007
1269	cg09866743	0.00399361
1270	cg04299080	0.00399015
1271	cg15820574	0.00398392
1272	cg18232828	0.00397045
1273	cg18891762	0.00396824
1274	cg08076266	0.00395894
1275	cg19760072	0.00395234
1276	cg10092524	0.00394904
1277	cg12145080	0.00394657
1278	cg07319143	0.00394185
1279	cg07658508	0.00394149
1280	cg02699218	0.00393847
1281	cg06911744	0.00393717
1282	cg17941572	0.00393635
1283	cg14506646	0.00393264
1284	cg10872107	0.00393218
1285	cg13117164	0.00392887
1286	cg21489622	0.00392406
1287	cg17639394	0.00392043
1288	cg19103546	0.0039192
1289	cg05696678	0.00391789
1290	cg24746666	0.00391785
1291	cg12527429	0.00391571
1292	cg01456368	0.00391472
1293	cg08736421	0.0039072
1294	cg26078244	0.0039047
1295	cg24317585	0.00390437
1296	cg20052079	0.0039043
1297	cg24846594	0.00390227
1298	cg26425305	0.00390071
1299	cg00813886	0.00389917
1300	cg04377145	0.00389807
1301	cg12131894	0.00389642
1302	cg04813466	0.00389488
1303	cg26387619	0.00389477
1304	cg19641395	0.00389205
1305	cg01119686	0.0038908
1306	cg26458142	0.00388607
1307	cg14585167	0.0038856
1308	cg24937747	0.00388556
1309	cg10767420	0.00388302
1310	cg24583966	0.00388102
1311	cg17588293	0.00387646
1312	cg13951491	0.00387556
1313	cg15913725	0.00387488
1314	cg18122392	0.00386053
1315	cg03426762	0.003852
1316	cg20826610	0.00385194
1317	cg09378448	0.00385064
1318	cg07665466	0.00384672
1319	cg19023977	0.0038464
1320	cg22259126	0.0038424
1321	cg23560159	0.00384222
1322	cg17981058	0.00384165
1323	cg07335843	0.00383341
1324	cg07466807	0.00383243
1325	cg25851842	0.00383148
1326	cg09936609	0.00382978
1327	cg23746497	0.00382657
1328	cg09551172	0.00382501
1329	cg25637655	0.00382058
1330	cg09126090	0.00381405
1331	cg11574975	0.00381322
1332	cg00774149	0.00381117
1333	cg18280125	0.00380878
1334	cg20335309	0.00380674
1335	cg01970407	0.00379844
1336	cg09414156	0.00379574
1337	cg11403689	0.00379457
1338	cg26383138	0.00379214
1339	cg12364115	0.00379024
1340	cg03687070	0.00378975
1341	cg25777912	0.00378939
1342	cg17772342	0.00378746
1343	cg11176990	0.0037832
1344	cg26385097	0.00377845
1345	cg13924809	0.00377243
1346	cg23660154	0.00376943
1347	cg09368716	0.00376703
1348	cg07832111	0.00376526
1349	cg19377234	0.00376374
1350	cg23226852	0.0037568
1351	cg06994090	0.0037533
1352	cg00746446	0.00374784
1353	cg03604011	0.0037468
1354	cg08813099	0.00374506
1355	cg12178578	0.00374421
1356	cg24968721	0.00374244
1357	cg03712965	0.00374119
1358	cg27196659	0.00373671
1359	cg06728252	0.00372551
1360	cg16760712	0.00371808
1361	cg06312797	0.00371601
1362	cg11718135	0.0037113
1363	cg05165445	0.00371104
1364	cg27075171	0.00369913
1365	cg25953239	0.00369835
1366	cg01074643	0.00368888
1367	cg14730704	0.00368691
1368	cg07637123	0.00368592
1369	cg07591442	0.00368582
1370	cg04228104	0.00368
1371	cg09264065	0.00367758
1372	cg01765111	0.003676
1373	cg04945331	0.00367322
1374	cg24143101	0.00366956
1375	cg04729768	0.00366859
1376	cg01305327	0.00366685
1377	cg20849692	0.00366154
1378	cg15924583	0.00366115
1379	cg06153538	0.0036566
1380	cg01600222	0.00365466
1381	cg25385412	0.00364722
1382	cg24348240	0.00364688
1383	cg13530938	0.00364009
1384	cg23329275	0.00363976
1385	cg09865676	0.00363924
1386	cg09228194	0.0036314
1387	cg10824107	0.00363037
1388	cg18599322	0.00362887
1389	cg26620710	0.00362788
1390	cg04513038	0.00362753
1391	cg27038439	0.00362639
1392	cg24657817	0.00362474
1393	cg04073265	0.00362418
1394	cg03025986	0.00362388
1395	cg25331250	0.00362027
1396	cg03232953	0.00361734
1397	cg04972348	0.00361486
1398	cg20679271	0.00361389
1399	cg02446366	0.00361029
1400	cg11225745	0.00360828
1401	cg02276822	0.00360034
1402	cg05625559	0.00359545
1403	cg17722231	0.00358938
1404	cg12256362	0.00358783
1405	cg18352616	0.00358629
1406	cg25456368	0.00358548
1407	cg03355998	0.00358521
1408	cg04562683	0.00358418
1409	cg08734053	0.00358226
1410	cg07166679	0.00358138
1411	cg20955693	0.00357561
1412	cg26500773	0.00357544
1413	cg05308656	0.00357449
1414	cg00940867	0.00356863
1415	cg01142635	0.00356202
1416	cg02881034	0.00356162
1417	cg13496041	0.00356143
1418	cg02281446	0.0035608
1419	cg11236515	0.00355762
1420	cg10987720	0.00355686
1421	cg19828175	0.0035523
1422	cg05637536	0.00355124
1423	cg26665891	0.00354911
1424	cg19980771	0.00354733
1425	cg12991125	0.00354696
1426	cg17520909	0.00354461
1427	cg14972155	0.0035382
1428	cg15406010	0.00353767
1429	cg22158769	0.00352989
1430	cg27219598	0.00352391
1431	cg23942289	0.00352316
1432	cg23954636	0.00351845
1433	cg07323141	0.00351417
1434	cg16328106	0.0035141
1435	cg05208416	0.003506
1436	cg24025008	0.00350211
1437	cg16679343	0.00349731
1438	cg13009965	0.00349461
1439	cg26427908	0.00348673
1440	cg07695835	0.0034867
1441	cg13493635	0.00348432
1442	cg23413547	0.00347901
1443	cg12731349	0.00347549
1444	cg25740565	0.00347535
1445	cg17391339	0.00347465
1446	cg20825892	0.00347448
1447	cg11254085	0.003472
1448	cg22641902	0.00346039
1449	cg05436760	0.00345713
1450	cg02694427	0.00345663
1451	cg04652943	0.00345312
1452	cg11651220	0.00345155
1453	cg09741240	0.00344753
1454	cg13029400	0.00344008
1455	cg05121790	0.0034397
1456	cg04025150	0.0034333
1457	cg00602234	0.00343193
1458	cg25482900	0.00342778
1459	cg24884142	0.00342763
1460	cg10784298	0.00342682
1461	cg16179507	0.00342581
1462	cg08722616	0.00342538
1463	cg00794400	0.00342398
1464	cg15674813	0.00342139
1465	cg04778236	0.00341593
1466	cg08085232	0.00341558
1467	cg07458308	0.00341549
1468	cg18744355	0.00341203
1469	cg07937453	0.00341186
1470	cg20681653	0.00340993
1471	cg14769373	0.00340238
1472	cg09871471	0.00339769
1473	cg09140778	0.00339252
1474	cg01067444	0.00339189
1475	cg05656442	0.0033914
1476	cg11983857	0.00338946
1477	cg03736795	0.00338928
1478	cg24004483	0.0033845
1479	cg09606832	0.00337512
1480	cg22707446	0.00336844
1481	cg05885936	0.00336565
1482	cg25159149	0.00336511
1483	cg22814023	0.00336256
1484	cg00419314	0.00336026
1485	cg01287012	0.00335185
1486	cg18148375	0.00334641
1487	cg20678442	0.0033448
1488	cg06898306	0.00334407
1489	cg05753527	0.00334018
1490	cg03965648	0.00333945
1491	cg18126442	0.003339
1492	cg13161113	0.00333786
1493	cg21226965	0.00333684
1494	cg06660332	0.00333643
1495	cg02788233	0.00333295
1496	cg18640250	0.00333158
1497	cg04794393	0.00332773
1498	cg11452391	0.00332573
1499	cg00460268	0.00332387
1500	cg18274791	0.00332069
1501	cg02925229	0.00331743
1502	cg23694520	0.00331688
1503	cg23948843	0.00331676
1504	cg13207467	0.00331608
1505	cg13340126	0.00331527
1506	cg16433074	0.00330677
1507	cg27064287	0.00330658
1508	cg18375860	0.00330157
1509	cg00386984	0.00330034
1510	cg21478921	0.00329989
1511	cg04164640	0.00329894
1512	cg00339300	0.00329391
1513	cg18267790	0.00329165
1514	cg00926215	0.00329109
1515	cg18373855	0.00329093
1516	cg09042437	0.00329003
1517	cg00539908	0.00329002
1518	cg24899315	0.00328905
1519	cg12294361	0.00328869
1520	cg22699676	0.00328753
1521	cg17511968	0.00328117
1522	cg09023136	0.00327479
1523	cg24483655	0.00327428
1524	cg01174175	0.00327028
1525	cg11379081	0.00326764
1526	cg11649821	0.00326624
1527	cg04663790	0.00326187
1528	cg17023254	0.00326081
1529	cg05890826	0.00325847
1530	cg11168432	0.00325542
1531	cg12186317	0.00325438
1532	cg23684855	0.00325427
1533	cg05144635	0.00325375
1534	cg25042346	0.00325201
1535	cg15665928	0.00324865
1536	cg25245569	0.00324436
1537	cg03918377	0.00324324
1538	cg10189605	0.00324218
1539	cg00116430	0.00323694
1540	cg15896098	0.00323204
1541	cg14927745	0.0032318
1542	cg00025647	0.0032276
1543	cg05468429	0.00322752
1544	cg01889143	0.00322655
1545	cg05305413	0.00322543
1546	cg01059331	0.00322351
1547	cg00409126	0.00322183
1548	cg09344629	0.00322081
1549	cg07348587	0.00322046
1550	cg15347189	0.00321886
1551	cg20980653	0.00321673
1552	cg02479100	0.00321667
1553	cg06627617	0.0032132
1554	cg04603811	0.0032123
1555	cg21855830	0.00320509
1556	cg23807890	0.00320406
1557	cg26559974	0.00320313
1558	cg25660386	0.00320107
1559	cg10563109	0.00319768
1560	cg22711792	0.00319608
1561	cg16704797	0.00319574
1562	cg09938328	0.00319528
1563	cg17886399	0.00319515
1564	cg15347342	0.00319244
1565	cg13347257	0.00319199
1566	cg01728682	0.00319126
1567	cg15996183	0.00319111
1568	cg11519760	0.00319045
1569	cg09044296	0.00318599
1570	cg05499272	0.00318311
1571	cg16101008	0.003183
1572	cg00426822	0.00318215
1573	cg18691800	0.00318064
1574	cg15196197	0.00318014
1575	cg12847502	0.00317725
1576	cg10764101	0.00317668
1577	cg01337207	0.0031761
1578	cg16053005	0.00317458
1579	cg09470963	0.00317409
1580	cg07802350	0.00316997
1581	cg00768993	0.00316751
1582	cg01074104	0.0031653
1583	cg04799210	0.00315995
1584	cg12387859	0.00315249
1585	cg10911971	0.00314767
1586	cg01577475	0.00314355
1587	cg06895831	0.00314316
1588	cg07518714	0.00314084
1589	cg24439334	0.00313324
1590	cg15154191	0.00313221
1591	cg09628877	0.00312817
1592	cg01761420	0.0031264
1593	cg14710465	0.00311887
1594	cg24541426	0.00311587
1595	cg04166618	0.0031157
1596	cg16195332	0.0031146
1597	cg00768487	0.00311429
1598	cg02969873	0.0031131
1599	cg22647546	0.0031115
1600	cg20250126	0.00311143
1601	cg26723570	0.00311053
1602	cg06834916	0.00311046
1603	cg17429900	0.00310703
1604	cg25063151	0.0031019
1605	cg26664161	0.00310024
1606	cg25463742	0.00309367
1607	cg15015913	0.00309287
1608	cg20403541	0.00308893
1609	cg15619820	0.00308559
1610	cg26803969	0.00308549
1611	cg04789475	0.00308526
1612	cg04019636	0.00308419
1613	cg08863830	0.00308379
1614	cg07121807	0.00308368
1615	cg14196395	0.00308255
1616	cg05422029	0.00308064
1617	cg24170085	0.00307485
1618	cg23859313	0.00307469
1619	cg16797972	0.00307312
1620	cg20906291	0.00307283
1621	cg00962755	0.00306878
1622	cg14815361	0.00306688
1623	cg27427514	0.0030662
1624	cg18273840	0.00306262
1625	cg13008631	0.00306063
1626	cg20005636	0.00305842
1627	cg16162058	0.00305401
1628	cg18318878	0.00305155
1629	cg16681520	0.00305098
1630	cg13339083	0.00304673
1631	cg22109262	0.00304572
1632	cg10943191	0.00304468
1633	cg08464855	0.00304326
1634	cg16206520	0.00304114
1635	cg16149238	0.00304011
1636	cg21399832	0.00303892
1637	cg18460422	0.00303815
1638	cg24013697	0.00303675
1639	cg12258785	0.00303645
1640	cg27205159	0.00303164
1641	cg19623054	0.00303112
1642	cg15524063	0.00302844
1643	cg09767598	0.00302772
1644	cg22198853	0.00302547
1645	cg25994476	0.0030253
1646	cg06904616	0.00302432
1647	cg16272981	0.00302355
1648	cg04193905	0.0030229
1649	cg01909551	0.00302231
1650	cg10620866	0.00302214
1651	cg01825295	0.00301396
1652	cg19923393	0.00301064
1653	cg11561191	0.00300996
1654	cg23058998	0.00300752
1655	cg09413064	0.00300646
1656	cg15709446	0.00299933
1657	cg07014673	0.00299898
1658	cg06630455	0.00299866
1659	cg24889021	0.00299654
1660	cg07500501	0.00299573
1661	cg08994336	0.00299495
1662	cg04524431	0.0029948
1663	cg08402365	0.00299114
1664	cg26165406	0.00298666
1665	cg27169503	0.00298482
1666	cg18078087	0.00298224
1667	cg14022881	0.00298175
1668	cg20826345	0.002979
1669	cg26120787	0.00297554
1670	cg05796704	0.0029696
1671	cg23478225	0.00296958
1672	cg19757631	0.00296837
1673	cg01716680	0.002967
1674	cg04025964	0.00296394
1675	cg23913421	0.00296279
1676	cg20951642	0.00296223
1677	cg25945158	0.00295957
1678	cg17325912	0.00295764
1679	cg02072484	0.00295711
1680	cg12451530	0.002957
1681	cg27130364	0.00295617
1682	cg07574458	0.00294944
1683	cg16329782	0.00294537
1684	cg21870645	0.0029452
1685	cg00532451	0.00294414
1686	cg00689580	0.00294392
1687	cg22308926	0.00294263
1688	cg08217124	0.00293783
1689	cg03354508	0.00293606
1690	cg16846645	0.00293603
1691	cg25144893	0.00293574
1692	cg07187855	0.00293562
1693	cg26695758	0.00293396
1694	cg10820045	0.00293114
1695	cg15703221	0.00292967
1696	cg11492102	0.0029294
1697	cg11667258	0.00292877
1698	cg15045771	0.00292772
1699	cg02775804	0.00292516
1700	cg25621096	0.00292461
1701	cg13372571	0.00292231
1702	cg26777729	0.00292004
1703	cg19003646	0.0029187
1704	cg22677715	0.00291381
1705	cg21752601	0.00291213
1706	cg00329270	0.00291192
1707	cg23924306	0.00291146
1708	cg22507154	0.00290917
1709	cg10393811	0.00290907
1710	cg17454086	0.00290879
1711	cg11753311	0.00290832
1712	cg26291698	0.00290744
1713	cg02783833	0.00290504
1714	cg03126058	0.00290441
1715	cg19592277	0.00290251
1716	cg13069918	0.00289935
1717	cg22692725	0.002899
1718	cg19047707	0.00289826
1719	cg06936803	0.00289359
1720	cg02331910	0.00289306
1721	cg19211880	0.00289237
1722	cg06842519	0.00289126
1723	cg01975461	0.00289062
1724	cg01360618	0.00288946
1725	cg01297500	0.00288522
1726	cg11591325	0.00288517
1727	cg02295872	0.0028792
1728	cg10210715	0.00287585
1729	cg17554716	0.00287461
1730	cg19251549	0.00287214
1731	cg13715001	0.00287177
1732	cg20724189	0.00287004
1733	cg06203364	0.00286839
1734	cg00240195	0.0028622
1735	cg09811759	0.00285988
1736	cg00064531	0.00285948
1737	cg23760103	0.00285922
1738	cg10168149	0.00285811
1739	cg17435901	0.00285491
1740	cg19217130	0.00285452
1741	cg11829291	0.00285254
1742	cg14206273	0.00285035
1743	cg05396397	0.00284985
1744	cg23037132	0.00284651
1745	cg00083652	0.00284446
1746	cg18325622	0.00284263
1747	cg19078576	0.00284221
1748	cg10941445	0.0028403
1749	cg20294304	0.00284011
1750	cg11213898	0.00283846
1751	cg19368103	0.00283842
1752	cg04486873	0.00283777
1753	cg03179450	0.00283768
1754	cg04111078	0.00283682
1755	cg03490766	0.00283333
1756	cg05225634	0.00282565
1757	cg26076724	0.00282315
1758	cg08490107	0.00281993
1759	cg08945011	0.00281915
1760	cg09667775	0.00281816
1761	cg21130861	0.00281791
1762	cg17167076	0.00281766
1763	cg22014661	0.00281476
1764	cg17816394	0.0028138
1765	cg04267000	0.0028121
1766	cg13914094	0.00281182
1767	cg14877896	0.00281165
1768	cg11322464	0.00281122
1769	cg11715981	0.00281105
1770	cg15957461	0.00281079
1771	cg23331626	0.00281069
1772	cg10054150	0.00280973
1773	cg02008279	0.0028091
1774	cg00608362	0.00280854
1775	cg05804170	0.00280572
1776	cg24619378	0.00280158
1777	cg14690181	0.00280025
1778	cg15815053	0.00279983
1779	cg17974166	0.0027964
1780	cg22797514	0.00279439
1781	cg12412079	0.00279341
1782	cg04353997	0.00279002
1783	cg06819251	0.00278955
1784	cg04678713	0.00278944
1785	cg12593511	0.00278928
1786	cg24508713	0.00278436
1787	cg23688809	0.00277483
1788	cg15639659	0.00276997
1789	cg18967534	0.00276871
1790	cg22612448	0.00276666
1791	cg24545495	0.00276631
1792	cg06946452	0.00276452
1793	cg13071386	0.0027626
1794	cg19212767	0.00275898
1795	cg24757310	0.00275751
1796	cg06087028	0.00275502
1797	cg06891548	0.00275395
1798	cg24938498	0.00274911
1799	cg21557724	0.00274781
1800	cg17034390	0.00274681
1801	cg06546834	0.00274341
1802	cg23975564	0.00274234
1803	cg00055434	0.00274111
1804	cg16391955	0.00274038
1805	cg20801456	0.00273585
1806	cg06525231	0.00273446
1807	cg00327796	0.00273314
1808	cg17091049	0.00273286
1809	cg07229500	0.00272899
1810	cg26752576	0.00272846
1811	cg14511923	0.00272807
1812	cg22073507	0.00272653
1813	cg22226438	0.0027224
1814	cg17792876	0.00271953
1815	cg11177980	0.00271949
1816	cg14649507	0.00271942
1817	cg26919818	0.00271777
1818	cg22880770	0.0027118
1819	cg04828158	0.00271079
1820	cg02081019	0.00271046
1821	cg06518838	0.00270902
1822	cg19873602	0.00270852
1823	cg15202770	0.00270819
1824	cg04786857	0.00270758
1825	cg19825600	0.00270538
1826	cg24315049	0.00270484
1827	cg03972163	0.00270295
1828	cg14250740	0.00269933
1829	cg09415754	0.00269922
1830	cg21046959	0.00269622
1831	cg01829241	0.00269363
1832	cg07033710	0.00269345
1833	cg20942691	0.00269311
1834	cg12918895	0.00269183
1835	cg23046231	0.00268961
1836	cg21164697	0.00268837
1837	cg10930664	0.00268706
1838	cg04447741	0.00268683
1839	cg23234434	0.00268423
1840	cg19780570	0.00268362
1841	cg24763840	0.00267971
1842	cg02081006	0.00267877
1843	cg25593631	0.00267706
1844	cg09912667	0.00267279
1845	cg06271087	0.00267106
1846	cg19984170	0.00267088
1847	cg17471193	0.00267027
1848	cg20556304	0.00266928
1849	cg17643796	0.00266599
1850	cg08343881	0.00266575
1851	cg03427058	0.00266423
1852	cg10679301	0.00266234
1853	cg17619208	0.00266117
1854	cg02642549	0.00265941
1855	cg08266417	0.00265688
1856	cg23901857	0.00265551
1857	cg18143143	0.0026551
1858	cg15972506	0.00265502
1859	cg18240331	0.00265487
1860	cg02010196	0.00265276
1861	cg22161147	0.00265227
1862	cg14984126	0.00264961
1863	cg03309545	0.00264723
1864	cg11990058	0.00264712
1865	cg21767135	0.0026431
1866	cg10088320	0.00264153
1867	cg15400655	0.00263767
1868	cg26873705	0.00263628
1869	cg13785473	0.00263501
1870	cg03252709	0.00263267
1871	cg26202797	0.00263212
1872	cg01413566	0.00263123
1873	cg04981208	0.00263086
1874	cg15480114	0.0026299
1875	cg10058766	0.00262972
1876	cg08310581	0.0026285
1877	cg00011225	0.0026203
1878	cg25849196	0.00261814
1879	cg26576890	0.00261321
1880	cg27425314	0.0026105
1881	cg01604404	0.00261031
1882	cg23156804	0.00260549
1883	cg19679311	0.00260505
1884	cg13592780	0.00260385
1885	cg07124687	0.00260306
1886	cg26347746	0.00260129
1887	cg23363832	0.00259923
1888	cg14597739	0.00259835
1889	cg11552072	0.00259704
1890	cg21160516	0.00259703
1891	cg07714812	0.00259677
1892	cg08882060	0.00259657
1893	cg10488267	0.00259567
1894	cg14742802	0.0025932
1895	cg12959820	0.00259123
1896	cg18901896	0.00259113
1897	cg16447950	0.0025898
1898	cg13703364	0.00258855
1899	cg03291607	0.00258752
1900	cg15995125	0.00258638
1901	cg22487367	0.00258503
1902	cg16691557	0.00258456
1903	cg11904906	0.00258374
1904	cg25101898	0.00258335
1905	cg24740026	0.00258158
1906	cg27136844	0.00258033
1907	cg20321153	0.00257872
1908	cg00217080	0.00257836
1909	cg24470657	0.00257754
1910	cg18011163	0.00257544
1911	cg23467747	0.00256932
1912	cg26445292	0.00256829
1913	cg01720945	0.00256753
1914	cg24503056	0.00256618
1915	cg24914355	0.00256492
1916	cg05755900	0.00256457
1917	cg07912922	0.00256221
1918	cg22983282	0.00256173
1919	cg17073273	0.00256163
1920	cg18174052	0.00255731
1921	cg00061805	0.00255681
1922	cg08291049	0.00255551
1923	cg00747290	0.00255512
1924	cg16435923	0.00255467
1925	cg05596328	0.00255145
1926	cg24883265	0.00255134
1927	cg01100175	0.00255117
1928	cg00084338	0.00255094
1929	cg11264947	0.00254926
1930	cg04505252	0.00254867
1931	cg23256802	0.0025478
1932	cg25018801	0.00254691
1933	cg08447525	0.00254677
1934	cg10729419	0.0025465
1935	cg27167184	0.00254319
1936	cg01552919	0.00254241
1937	cg07576219	0.00254234
1938	cg13458645	0.00253969
1939	cg05234121	0.00253894
1940	cg00579717	0.00253663
1941	cg14450273	0.00253587
1942	cg09684160	0.00253526
1943	cg05601917	0.00253296
1944	cg01016662	0.00253052
1945	cg22857025	0.00252921
1946	cg18856478	0.00252877
1947	cg01241758	0.00252773
1948	cg03176453	0.00252501
1949	cg14930390	0.00252423
1950	cg03981727	0.00252046
1951	cg20988098	0.00252013
1952	cg07233838	0.00251826
1953	cg01172682	0.00251571
1954	cg09098195	0.00251554
1955	cg08911638	0.00251381
1956	cg07098566	0.00251335
1957	cg08806184	0.00251299
1958	cg09754110	0.00251255
1959	cg06916239	0.00251198
1960	cg03553786	0.00250866
1961	cg25822369	0.00250778
1962	cg23548612	0.00250775
1963	cg20942286	0.00250729
1964	cg02934633	0.00250679
1965	cg09032973	0.00250635
1966	cg07864883	0.00250564
1967	cg10883171	0.00250524
1968	cg27136299	0.00250437
1969	cg19287823	0.00250238
1970	cg07609108	0.00249791
1971	cg17980283	0.00249703
1972	cg00473416	0.00249649
1973	cg23647410	0.00249646
1974	cg02081925	0.00249539
1975	cg12791136	0.00249297
1976	cg22084642	0.00249135
1977	cg26292910	0.0024912
1978	cg17386911	0.00249102
1979	cg17786864	0.00248933
1980	cg21621104	0.00248844
1981	cg11921736	0.00248663
1982	cg26247841	0.00248406
1983	cg12043166	0.00248227
1984	cg10135588	0.00248117
1985	cg26450801	0.00247861
1986	cg18856388	0.00247543
1987	cg25801701	0.00247452
1988	cg09365002	0.00247362
1989	cg23493167	0.00247245
1990	cg17817067	0.00247195
1991	cg20985028	0.00247145
1992	cg07286681	0.00247084
1993	cg24722365	0.00246934
1994	cg16399136	0.00246848
1995	cg14808378	0.00246726
1996	cg04500730	0.00246622
1997	cg08469215	0.00246479
1998	cg18421949	0.00246387
1999	cg16298481	0.00246328
[truncated: 40,384 more rows]
