# Supplementary material for: Distinguishing Glioblastoma Subtypes by Methylation Signatures
Source: Front Genet. 2020 Nov 24;11:604336. doi: 10.3389/fgene.2020.604336 (PMC7732602; doi:10.3389/fgene.2020.604336)
Supplement: Supplementary Table 2 — 10-fold cross-validation performance of IFS with SVM, RF, and RIPPER when using different number of features ranked by MCFS. [file Table_2.XLSX]

## Sheet: Random forest
Number of features	G34	MES	MID	MYCN	RTK	RTK II	RTK III	Overall accuracy	MCC
10	1	0.410714	0.428571	0.4375	0.296875	0.762238	0.076923	0.59366	0.4496
20	1	0.446429	0.428571	0.25	0.296875	0.811189	0.076923	0.610951	0.471239
30	1	0.392857	1	0.5625	0.75	0.846154	0.153846	0.740634	0.650306
40	1	0.446429	1	0.75	0.78125	0.895105	0.307692	0.789625	0.717722
50	1	0.428571	0.928571	0.8125	0.8125	0.902098	0.461538	0.801153	0.733593
60	1	0.428571	0.928571	0.8125	0.828125	0.909091	0.615385	0.81268	0.749535
70	1	0.428571	0.928571	0.75	0.828125	0.902098	0.692308	0.809798	0.74512
80	1	0.464286	0.928571	0.8125	0.84375	0.895105	0.692308	0.818444	0.756806
90	1	0.446429	1	0.75	0.8125	0.909091	0.615385	0.81268	0.749701
100	1	0.410714	0.857143	1	0.84375	0.895105	0.615385	0.81268	0.749494
110	1	0.607143	0.928571	0.9375	0.8125	0.93007	0.769231	0.85879	0.811812
120	1	0.553571	0.928571	0.9375	0.8125	0.93007	0.615385	0.84438	0.792568
130	1	0.607143	0.928571	0.875	0.828125	0.951049	0.692308	0.864553	0.820087
140	1	0.589286	0.928571	0.9375	0.8125	0.972028	0.769231	0.873199	0.833454
150	1	0.625	0.928571	0.9375	0.8125	0.958042	0.692308	0.870317	0.828221
160	1	0.625	1	0.875	0.828125	0.958042	0.769231	0.876081	0.835984
170	1	0.625	1	0.875	0.84375	0.93007	0.692308	0.864553	0.819424
180	1	0.660714	1	1	0.828125	0.951049	0.692308	0.881844	0.843264
190	1	0.678571	0.928571	0.875	0.84375	0.958042	0.692308	0.881844	0.842848
200	1	0.678571	1	0.9375	0.859375	0.958042	0.769231	0.893372	0.858553
210	1	0.678571	1	0.9375	0.84375	0.937063	0.692308	0.878963	0.838628
220	1	0.696429	1	1	0.8125	0.944056	0.615385	0.878963	0.839036
230	1	0.696429	0.928571	0.9375	0.84375	0.937063	0.692308	0.878963	0.8384
240	1	0.696429	1	0.9375	0.84375	0.944056	0.692308	0.884726	0.846631
250	1	0.696429	0.928571	0.9375	0.859375	0.916084	0.769231	0.876081	0.834181
260	1	0.714286	0.928571	1	0.84375	0.93007	0.769231	0.884726	0.846071
270	1	0.678571	0.928571	1	0.875	0.958042	0.769231	0.896254	0.862234
280	1	0.660714	0.928571	1	0.859375	0.937063	0.692308	0.878963	0.838591
290	1	0.678571	0.928571	0.9375	0.828125	0.937063	0.769231	0.876081	0.834687
300	1	0.714286	1	1	0.84375	0.944056	0.769231	0.893372	0.858198
310	1	0.696429	0.928571	0.9375	0.828125	0.958042	0.692308	0.884726	0.846777
320	1	0.660714	0.928571	1	0.84375	0.93007	0.769231	0.876081	0.834775
330	1	0.696429	1	0.9375	0.859375	0.958042	0.769231	0.896254	0.862433
340	1	0.678571	1	0.9375	0.84375	0.944056	0.769231	0.884726	0.84657
350	1	0.678571	1	1	0.859375	0.951049	0.769231	0.893372	0.858392
360	1	0.696429	1	0.9375	0.875	0.944056	0.769231	0.893372	0.857952
370	1	0.660714	1	1	0.84375	0.944056	0.769231	0.884726	0.847082
380	1	0.678571	0.928571	0.9375	0.859375	0.958042	0.692308	0.887608	0.850747
390	1	0.714286	1	1	0.875	0.937063	0.769231	0.896254	0.861643
400	1	0.678571	1	1	0.875	0.951049	0.769231	0.896254	0.862312
410	1	0.714286	0.928571	1	0.859375	0.958042	0.769231	0.899135	0.866057
420	1	0.732143	0.928571	1	0.84375	0.93007	0.769231	0.887608	0.849879
430	1	0.696429	1	1	0.859375	0.93007	0.769231	0.887608	0.850122
440	1	0.714286	1	1	0.8125	0.937063	0.769231	0.884726	0.846609
450	1	0.696429	0.928571	1	0.859375	0.958042	0.692308	0.893372	0.858457
460	1	0.732143	1	1	0.84375	0.951049	0.769231	0.899135	0.866027
470	1	0.678571	0.928571	1	0.84375	0.944056	0.769231	0.884726	0.846621
480	1	0.75	0.928571	1	0.8125	0.951049	0.769231	0.893372	0.858218
490	1	0.714286	1	1	0.859375	0.944056	0.769231	0.896254	0.861973
500	1	0.696429	1	1	0.84375	0.951049	0.769231	0.893372	0.85844
510	1	0.714286	0.928571	1	0.859375	0.937063	0.769231	0.89049	0.853833
520	1	0.732143	0.928571	1	0.828125	0.944056	0.769231	0.89049	0.854125
530	1	0.696429	1	0.9375	0.84375	0.944056	0.769231	0.887608	0.850335
540	1	0.678571	1	1	0.859375	0.965035	0.769231	0.899135	0.866862
550	1	0.678571	1	1	0.84375	0.951049	0.769231	0.89049	0.854663
560	1	0.696429	0.928571	1	0.84375	0.958042	0.769231	0.893372	0.858402
570	1	0.714286	1	1	0.828125	0.951049	0.769231	0.893372	0.858531
580	1	0.678571	0.928571	1	0.828125	0.93007	0.846154	0.878963	0.838573
590	1	0.642857	1	1	0.84375	0.944056	0.769231	0.881844	0.843246
600	1	0.732143	1	1	0.859375	0.965035	0.769231	0.907781	0.87795
610	1	0.714286	0.928571	1	0.84375	0.951049	0.769231	0.893372	0.858214
620	1	0.732143	0.928571	1	0.84375	0.93007	0.769231	0.887608	0.849877
630	1	0.75	0.928571	1	0.84375	0.951049	0.769231	0.899135	0.865595
640	1	0.696429	0.928571	1	0.859375	0.937063	0.769231	0.887608	0.850193
650	1	0.732143	0.928571	1	0.828125	0.93007	0.769231	0.884726	0.846064
660	1	0.714286	1	1	0.828125	0.958042	0.846154	0.899135	0.866544
670	1	0.696429	0.928571	1	0.84375	0.937063	0.769231	0.884726	0.8463
680	1	0.714286	0.928571	1	0.84375	0.958042	0.769231	0.896254	0.86229
690	1	0.696429	0.928571	1	0.84375	0.944056	0.769231	0.887608	0.850354
700	1	0.732143	0.928571	1	0.828125	0.944056	0.769231	0.89049	0.854133
710	1	0.732143	0.928571	1	0.84375	0.958042	0.846154	0.902017	0.869922
720	1	0.696429	1	1	0.84375	0.951049	0.769231	0.893372	0.85855
730	1	0.732143	1	1	0.84375	0.951049	0.692308	0.896254	0.862168
740	1	0.714286	0.928571	1	0.859375	0.937063	0.769231	0.89049	0.853796
750	1	0.714286	1	1	0.859375	0.951049	0.769231	0.899135	0.866046
760	1	0.732143	1	1	0.859375	0.944056	0.692308	0.896254	0.861909
770	1	0.696429	0.928571	1	0.828125	0.951049	0.769231	0.887608	0.850709
780	1	0.714286	1	1	0.828125	0.937063	0.769231	0.887608	0.850372
790	1	0.696429	0.928571	1	0.859375	0.958042	0.846154	0.899135	0.866219
800	1	0.714286	1	1	0.84375	0.944056	0.769231	0.893372	0.858042
810	1	0.678571	0.928571	1	0.84375	0.93007	0.769231	0.878963	0.838493
820	1	0.732143	1	1	0.859375	0.944056	0.769231	0.899135	0.865721
830	1	0.714286	0.928571	1	0.828125	0.944056	0.769231	0.887608	0.850216
840	1	0.678571	0.928571	1	0.828125	0.951049	0.846154	0.887608	0.850856
850	1	0.732143	0.928571	1	0.828125	0.958042	0.769231	0.896254	0.862299
860	1	0.678571	0.928571	1	0.84375	0.937063	0.846154	0.884726	0.846339
870	1	0.714286	1	1	0.859375	0.944056	0.769231	0.896254	0.861973
880	1	0.732143	1	1	0.828125	0.958042	0.846154	0.902017	0.870268
890	1	0.696429	1	1	0.8125	0.944056	0.769231	0.884726	0.846941
900	1	0.660714	0.928571	1	0.84375	0.951049	0.846154	0.887608	0.850884
910	1	0.696429	0.928571	1	0.84375	0.965035	0.769231	0.896254	0.862731
920	1	0.678571	0.928571	1	0.828125	0.944056	0.769231	0.881844	0.842845
930	1	0.714286	0.928571	1	0.859375	0.951049	0.769231	0.896254	0.861994
940	1	0.714286	1	1	0.8125	0.958042	0.846154	0.896254	0.862831
950	1	0.714286	1	1	0.828125	0.944056	0.846154	0.893372	0.858319
960	1	0.732143	0.928571	1	0.828125	0.951049	0.769231	0.893372	0.858196
970	1	0.696429	1	1	0.828125	0.944056	0.769231	0.887608	0.850684
980	1	0.75	0.928571	1	0.84375	0.937063	0.769231	0.893372	0.85768
990	1	0.714286	1	1	0.84375	0.951049	0.769231	0.896254	0.862283
1000	1	0.696429	1	1	0.828125	0.944056	0.769231	0.887608	0.8507
1010	1	0.696429	0.928571	1	0.84375	0.965035	0.846154	0.899135	0.866601
1020	1	0.714286	0.928571	1	0.828125	0.951049	0.769231	0.89049	0.854447
1030	1	0.678571	1	1	0.875	0.937063	0.846154	0.893372	0.858171
1040	1	0.696429	1	1	0.84375	0.951049	0.769231	0.893372	0.85855
1050	1	0.732143	1	1	0.828125	0.944056	0.769231	0.893372	0.858198
1060	1	0.678571	0.928571	1	0.84375	0.944056	0.846154	0.887608	0.850513
1070	1	0.785714	1	1	0.84375	0.944056	0.769231	0.904899	0.87331
1080	1	0.696429	0.928571	1	0.875	0.965035	0.769231	0.902017	0.870019
1090	1	0.678571	0.928571	1	0.84375	0.951049	0.846154	0.89049	0.854605
1100	1	0.714286	0.928571	1	0.828125	0.937063	0.769231	0.884726	0.846293
1110	1	0.714286	1	1	0.828125	0.93007	0.846154	0.887608	0.850214
1120	1	0.732143	0.928571	1	0.859375	0.951049	0.846154	0.902017	0.869622
1130	1	0.75	0.928571	1	0.828125	0.951049	0.769231	0.896254	0.861956
1140	1	0.696429	1	1	0.828125	0.951049	0.846154	0.893372	0.858723
1150	1	0.714286	0.928571	1	0.828125	0.937063	0.769231	0.884726	0.846305
1160	1	0.732143	1	1	0.84375	0.944056	0.846154	0.899135	0.865837
1170	1	0.732143	1	1	0.8125	0.937063	0.846154	0.89049	0.854249
1180	1	0.642857	1	1	0.828125	0.965035	0.769231	0.887608	0.852084
1190	1	0.696429	0.928571	1	0.828125	0.944056	0.769231	0.884726	0.846587
1200	1	0.732143	0.928571	1	0.84375	0.944056	0.769231	0.893372	0.857905
1210	1	0.732143	0.928571	1	0.828125	0.93007	0.846154	0.887608	0.849943
1220	1	0.714286	0.928571	1	0.859375	0.937063	0.769231	0.89049	0.853796
1230	1	0.714286	0.928571	1	0.828125	0.965035	0.769231	0.896254	0.862701
1240	1	0.714286	1	1	0.828125	0.965035	0.769231	0.899135	0.866802
1250	1	0.696429	0.928571	1	0.84375	0.937063	0.769231	0.884726	0.846373
1260	1	0.678571	1	1	0.84375	0.944056	0.769231	0.887608	0.8507
1270	1	0.696429	1	1	0.828125	0.951049	0.769231	0.89049	0.8548
1280	1	0.696429	0.928571	1	0.84375	0.951049	0.846154	0.893372	0.858337
1290	1	0.696429	0.928571	1	0.84375	0.944056	0.846154	0.89049	0.854258
1300	1	0.714286	0.928571	1	0.796875	0.951049	0.769231	0.884726	0.846959
1310	1	0.696429	1	1	0.828125	0.958042	0.846154	0.896254	0.862831
1320	1	0.732143	1	1	0.828125	0.93007	0.769231	0.887608	0.850146
1330	1	0.75	1	1	0.859375	0.937063	0.846154	0.902017	0.86938
1340	1	0.732143	1	1	0.859375	0.937063	0.846154	0.899135	0.865593
1350	1	0.696429	1	1	0.828125	0.916084	0.769231	0.876081	0.834423
1360	1	0.696429	0.928571	1	0.828125	0.951049	0.769231	0.887608	0.850747
1370	1	0.75	0.928571	1	0.828125	0.951049	0.769231	0.896254	0.861956
1380	1	0.714286	1	1	0.828125	0.965035	0.846154	0.902017	0.8707
1390	1	0.660714	0.928571	1	0.859375	0.923077	0.769231	0.876081	0.834615
1400	1	0.696429	0.928571	1	0.8125	0.965035	0.769231	0.89049	0.855268
1410	1	0.732143	1	1	0.828125	0.951049	0.769231	0.896254	0.862315
1420	1	0.714286	0.928571	1	0.84375	0.937063	0.846154	0.89049	0.853959
1430	1	0.678571	0.928571	1	0.828125	0.944056	0.846154	0.884726	0.846742
1440	1	0.732143	1	1	0.84375	0.958042	0.769231	0.902017	0.870122
1450	1	0.714286	0.928571	1	0.859375	0.923077	0.769231	0.884726	0.845907
1460	1	0.678571	0.928571	1	0.828125	0.958042	0.769231	0.887608	0.851095
1470	1	0.696429	1	1	0.828125	0.951049	0.769231	0.89049	0.854792
1480	1	0.678571	0.928571	1	0.84375	0.944056	0.769231	0.884726	0.846621
1490	1	0.696429	1	0.9375	0.859375	0.951049	0.769231	0.893372	0.858395
1500	1	0.75	0.928571	1	0.828125	0.944056	0.769231	0.893372	0.857906
1510	1	0.696429	0.928571	1	0.796875	0.944056	0.846154	0.881844	0.842983
1520	1	0.696429	1	1	0.828125	0.972028	0.846154	0.902017	0.871222
1530	1	0.678571	0.928571	1	0.828125	0.937063	0.769231	0.878963	0.838735
1540	1	0.696429	0.928571	1	0.828125	0.951049	0.769231	0.887608	0.850691
1550	1	0.696429	0.928571	1	0.828125	0.958042	0.769231	0.89049	0.854828
1560	1	0.714286	0.928571	1	0.84375	0.944056	0.846154	0.893372	0.858014
1570	1	0.660714	1	1	0.84375	0.965035	0.846154	0.896254	0.863371
1580	1	0.660714	0.928571	1	0.828125	0.937063	0.769231	0.876081	0.834982
1590	1	0.696429	0.928571	1	0.828125	0.958042	0.769231	0.89049	0.854939
1600	1	0.696429	0.928571	1	0.84375	0.923077	0.846154	0.881844	0.842056
1610	1	0.696429	1	1	0.84375	0.937063	0.769231	0.887608	0.850369
1620	1	0.696429	1	1	0.84375	0.944056	0.846154	0.893372	0.858319
1630	1	0.696429	0.928571	1	0.8125	0.951049	0.769231	0.884726	0.846966
1640	1	0.696429	1	1	0.828125	0.951049	0.769231	0.89049	0.8548
1650	1	0.714286	1	1	0.859375	0.951049	0.769231	0.899135	0.866046
1660	1	0.714286	1	1	0.828125	0.965035	0.846154	0.902017	0.8707
1670	1	0.678571	0.928571	1	0.828125	0.958042	0.769231	0.887608	0.851152
1680	1	0.696429	0.928571	1	0.828125	0.951049	0.769231	0.887608	0.850761
1690	1	0.732143	0.928571	1	0.84375	0.979021	0.846154	0.910663	0.882347
1700	1	0.732143	0.928571	1	0.8125	0.951049	0.769231	0.89049	0.85445
1710	1	0.732143	1	0.9375	0.84375	0.93007	0.769231	0.887608	0.849976
1720	1	0.696429	0.928571	1	0.84375	0.951049	0.769231	0.89049	0.854523
1730	1	0.642857	1	1	0.84375	0.951049	0.846154	0.887608	0.851325
1740	1	0.696429	0.928571	1	0.84375	0.944056	0.769231	0.887608	0.850354
1750	1	0.678571	0.928571	1	0.8125	0.951049	0.769231	0.881844	0.843212
1760	1	0.732143	0.928571	1	0.8125	0.951049	0.769231	0.89049	0.85445
1770	1	0.75	1	1	0.84375	0.93007	0.846154	0.896254	0.861591
1780	1	0.75	1	1	0.84375	0.958042	0.769231	0.904899	0.873875
1790	1	0.732143	0.928571	1	0.828125	0.93007	0.846154	0.887608	0.849936
1800	1	0.714286	1	1	0.796875	0.951049	0.769231	0.887608	0.851064
1810	1	0.678571	1	1	0.828125	0.958042	0.692308	0.887608	0.851331
1820	1	0.696429	1	1	0.828125	0.944056	0.769231	0.887608	0.850683
1830	1	0.696429	1	1	0.8125	0.93007	0.846154	0.881844	0.842683
1840	1	0.732143	1	1	0.828125	0.951049	0.846154	0.899135	0.866167
1850	1	0.714286	1	1	0.84375	0.944056	0.846154	0.896254	0.862077
1860	1	0.714286	1	1	0.8125	0.951049	0.769231	0.89049	0.8548
1870	1	0.696429	0.928571	1	0.828125	0.958042	0.846154	0.893372	0.858729
1880	1	0.696429	0.928571	1	0.8125	0.965035	0.769231	0.89049	0.855335
1890	1	0.696429	0.928571	1	0.828125	0.951049	0.846154	0.89049	0.854605
1900	1	0.696429	0.928571	1	0.8125	0.972028	0.769231	0.893372	0.859473
1910	1	0.732143	1	1	0.8125	0.951049	0.769231	0.893372	0.858532
1920	1	0.642857	0.928571	1	0.8125	0.951049	0.846154	0.878963	0.839692
1930	1	0.696429	1	1	0.828125	0.958042	0.769231	0.893372	0.858932
1940	1	0.714286	1	1	0.84375	0.951049	0.769231	0.896254	0.862292
1950	1	0.714286	0.928571	1	0.84375	0.951049	0.846154	0.896254	0.862081
1960	1	0.696429	1	1	0.828125	0.958042	0.769231	0.893372	0.858951
1970	1	0.75	0.928571	1	0.859375	0.958042	0.846154	0.907781	0.877424
1980	1	0.660714	1	1	0.796875	0.965035	0.769231	0.884726	0.848289
1990	1	0.678571	1	1	0.828125	0.937063	0.769231	0.881844	0.842836
2000	1	0.732143	1	1	0.828125	0.951049	0.846154	0.899135	0.865991
2010	1	0.678571	1	1	0.859375	0.944056	0.846154	0.893372	0.858405
2020	1	0.660714	1	1	0.828125	0.958042	0.846154	0.89049	0.855439
2030	1	0.678571	1	1	0.828125	0.972028	0.846154	0.899135	0.867535
2040	1	0.714286	0.928571	1	0.796875	0.958042	0.769231	0.887608	0.851118
2050	1	0.714286	1	1	0.84375	0.937063	0.846154	0.893372	0.858028
2060	1	0.696429	1	0.9375	0.828125	0.958042	0.923077	0.896254	0.862868
2070	1	0.732143	0.928571	0.9375	0.828125	0.965035	0.846154	0.899135	0.86643
2080	1	0.678571	0.928571	1	0.84375	0.951049	0.846154	0.89049	0.854605
2090	1	0.714286	1	1	0.8125	0.972028	0.769231	0.899135	0.867046
2100	1	0.678571	1	1	0.828125	0.951049	0.846154	0.89049	0.85498
2110	1	0.696429	0.928571	1	0.8125	0.944056	0.769231	0.881844	0.842882
2120	1	0.678571	0.928571	1	0.8125	0.944056	0.846154	0.881844	0.842983
2130	1	0.678571	0.928571	1	0.828125	0.944056	0.769231	0.881844	0.842828
2140	1	0.678571	0.928571	1	0.828125	0.951049	0.846154	0.887608	0.850856
2150	1	0.678571	0.928571	1	0.84375	0.93007	0.769231	0.878963	0.838452
2160	1	0.696429	1	1	0.84375	0.944056	0.846154	0.893372	0.858319
2170	1	0.678571	0.928571	1	0.8125	0.944056	0.769231	0.878963	0.838897
2180	1	0.732143	0.928571	1	0.828125	0.965035	0.769231	0.899135	0.866416
2190	1	0.696429	0.928571	1	0.84375	0.965035	0.846154	0.899135	0.866632
2200	1	0.678571	0.928571	1	0.828125	0.93007	0.769231	0.876081	0.834686
2210	1	0.714286	0.928571	1	0.8125	0.937063	0.846154	0.884726	0.846421
2220	1	0.714286	1	1	0.84375	0.958042	0.769231	0.899135	0.866218
2230	1	0.714286	0.928571	1	0.828125	0.944056	0.769231	0.887608	0.850354
2240	1	0.696429	1	1	0.84375	0.958042	0.846154	0.899135	0.866553
2250	1	0.696429	0.928571	1	0.828125	0.944056	0.846154	0.887608	0.850478
2260	1	0.660714	0.928571	1	0.8125	0.951049	0.769231	0.878963	0.839514
2270	1	0.660714	1	1	0.859375	0.972028	0.769231	0.899135	0.867433
2280	1	0.714286	1	1	0.8125	0.958042	0.769231	0.893372	0.858932
2290	1	0.642857	0.928571	1	0.84375	0.979021	0.769231	0.893372	0.86016
2300	1	0.696429	0.928571	1	0.8125	0.951049	0.846154	0.887608	0.850848
2310	1	0.696429	0.928571	1	0.84375	0.958042	0.769231	0.893372	0.858553
2320	1	0.696429	0.928571	1	0.796875	0.93007	0.769231	0.873199	0.830914
2330	1	0.660714	0.928571	1	0.8125	0.951049	0.769231	0.878963	0.839561
2340	1	0.696429	0.928571	1	0.828125	0.951049	0.769231	0.887608	0.850709
2350	1	0.732143	1	1	0.828125	0.93007	0.846154	0.89049	0.854015
2360	1	0.714286	1	1	0.8125	0.951049	0.846154	0.893372	0.858696
2370	1	0.696429	1	1	0.8125	0.958042	0.769231	0.89049	0.855216
2380	1	0.660714	0.928571	1	0.8125	0.951049	0.769231	0.878963	0.839514
2390	1	0.696429	1	1	0.828125	0.958042	0.923077	0.899135	0.866746
2400	1	0.696429	0.928571	1	0.8125	0.937063	0.846154	0.881844	0.84266
2410	1	0.714286	1	1	0.828125	0.958042	0.769231	0.896254	0.86266
2420	1	0.678571	0.928571	1	0.84375	0.951049	0.846154	0.89049	0.854605
2430	1	0.678571	1	1	0.8125	0.958042	0.769231	0.887608	0.85151
2440	1	0.714286	1	1	0.84375	0.944056	0.846154	0.896254	0.862096
2450	1	0.75	1	1	0.8125	0.944056	0.769231	0.893372	0.858199
2460	1	0.678571	1	1	0.84375	0.958042	0.846154	0.896254	0.86285
2470	1	0.75	0.928571	1	0.828125	0.93007	0.769231	0.887608	0.849877
2480	1	0.696429	1	1	0.8125	0.958042	0.846154	0.893372	0.858915
2490	1	0.696429	0.928571	1	0.84375	0.944056	0.769231	0.887608	0.850344
2500	1	0.660714	0.928571	1	0.796875	0.951049	0.846154	0.878963	0.839692
2510	1	0.696429	1	1	0.875	0.944056	0.769231	0.896254	0.86205
2520	1	0.732143	0.928571	1	0.828125	0.951049	0.846154	0.896254	0.862081
2530	1	0.660714	0.928571	1	0.84375	0.944056	0.769231	0.881844	0.842938
2540	1	0.696429	1	1	0.828125	0.965035	0.846154	0.899135	0.866999
2550	1	0.678571	0.928571	0.9375	0.828125	0.958042	0.769231	0.884726	0.847203
2560	1	0.732143	0.928571	1	0.828125	0.937063	0.846154	0.89049	0.853961
2570	1	0.696429	1	1	0.84375	0.951049	0.769231	0.893372	0.858531
2580	1	0.696429	1	1	0.84375	0.93007	0.769231	0.884726	0.846334
2590	1	0.696429	0.928571	1	0.796875	0.958042	0.769231	0.884726	0.847375
2600	1	0.714286	1	1	0.84375	0.965035	0.846154	0.904899	0.87442
2610	1	0.714286	1	1	0.8125	0.958042	0.846154	0.896254	0.862831
2620	1	0.696429	0.928571	1	0.84375	0.93007	0.769231	0.881844	0.842313
2630	1	0.732143	0.928571	1	0.8125	0.944056	0.846154	0.89049	0.854241
2640	1	0.714286	1	1	0.828125	0.944056	0.769231	0.89049	0.854444
2650	1	0.696429	0.928571	1	0.8125	0.944056	0.769231	0.881844	0.842828
2660	1	0.714286	1	1	0.875	0.951049	0.846154	0.904899	0.873695
2670	1	0.714286	0.928571	0.9375	0.828125	0.958042	0.769231	0.89049	0.854643
2680	1	0.678571	0.928571	1	0.8125	0.937063	0.923077	0.881844	0.842803
2690	1	0.678571	0.928571	1	0.84375	0.951049	0.846154	0.89049	0.854643
2700	1	0.732143	1	1	0.828125	0.958042	0.769231	0.899135	0.866429
2710	1	0.696429	1	1	0.828125	0.951049	0.846154	0.893372	0.858694
2720	1	0.660714	1	1	0.8125	0.965035	0.846154	0.89049	0.855966
2730	1	0.732143	1	1	0.828125	0.972028	0.769231	0.904899	0.874671
2740	1	0.678571	1	1	0.828125	0.951049	0.769231	0.887608	0.851062
2750	1	0.696429	0.928571	1	0.796875	0.951049	0.769231	0.881844	0.843212
2760	1	0.714286	0.928571	1	0.828125	0.965035	0.846154	0.899135	0.866601
2770	1	0.696429	1	1	0.84375	0.965035	0.769231	0.899135	0.866802
2780	1	0.678571	0.928571	1	0.84375	0.951049	0.769231	0.887608	0.850736
2790	1	0.714286	0.928571	1	0.78125	0.944056	0.846154	0.881844	0.843005
2800	1	0.678571	0.928571	1	0.828125	0.951049	0.846154	0.887608	0.850656
2810	1	0.678571	0.928571	1	0.8125	0.958042	0.769231	0.884726	0.84741
2820	1	0.732143	1	0.9375	0.828125	0.944056	0.769231	0.89049	0.854268
2830	1	0.678571	0.928571	1	0.828125	0.958042	0.923077	0.893372	0.858993
2840	1	0.660714	0.928571	1	0.8125	0.958042	0.769231	0.881844	0.84368
2850	1	0.714286	0.928571	1	0.828125	0.958042	0.846154	0.896254	0.862448
2860	1	0.696429	1	1	0.828125	0.958042	0.769231	0.893372	0.858933
2870	1	0.678571	1	1	0.828125	0.958042	0.769231	0.89049	0.855225
2880	1	0.678571	1	1	0.8125	0.951049	0.769231	0.884726	0.847344
2890	1	0.714286	0.928571	1	0.8125	0.951049	0.769231	0.887608	0.850691
2900	1	0.732143	0.928571	1	0.859375	0.951049	0.846154	0.902017	0.869602
2910	1	0.714286	1	1	0.828125	0.972028	0.846154	0.904899	0.87489
2920	1	0.660714	1	1	0.828125	0.951049	0.769231	0.884726	0.847371
2930	1	0.696429	1	1	0.859375	0.937063	0.846154	0.893372	0.858028
2940	1	0.678571	0.928571	1	0.828125	0.972028	0.769231	0.893372	0.859533
2950	1	0.714286	1	1	0.8125	0.965035	0.769231	0.896254	0.863106
2960	1	0.660714	0.928571	1	0.859375	0.937063	0.769231	0.881844	0.84279
2970	1	0.696429	0.928571	1	0.84375	0.944056	0.846154	0.89049	0.854258
2980	1	0.714286	0.928571	1	0.828125	0.951049	0.769231	0.89049	0.854447
2990	1	0.696429	0.928571	1	0.796875	0.951049	0.769231	0.881844	0.84303
3000	1	0.678571	1	1	0.84375	0.965035	0.769231	0.896254	0.863106
3010	1	0.678571	1	1	0.859375	0.937063	0.846154	0.89049	0.854304
3020	1	0.714286	1	1	0.8125	0.937063	0.769231	0.884726	0.846604
3030	1	0.696429	0.928571	1	0.84375	0.951049	0.769231	0.89049	0.854475
3040	1	0.714286	0.928571	1	0.8125	0.944056	0.923077	0.89049	0.854406
3050	1	0.660714	0.928571	1	0.828125	0.937063	0.846154	0.878963	0.838916
3060	1	0.678571	1	1	0.828125	0.972028	0.769231	0.896254	0.863651
3070	1	0.714286	0.928571	1	0.796875	0.958042	0.846154	0.89049	0.855002
3080	1	0.714286	1	0.9375	0.765625	0.951049	0.769231	0.878963	0.839316
3090	1	0.714286	1	1	0.859375	0.951049	0.769231	0.899135	0.86609
3100	1	0.696429	1	1	0.828125	0.965035	0.769231	0.896254	0.863164
3110	1	0.714286	0.928571	1	0.828125	0.951049	0.769231	0.89049	0.854455
3120	1	0.696429	1	1	0.8125	0.937063	0.769231	0.881844	0.842836
3130	1	0.714286	1	1	0.8125	0.965035	0.769231	0.896254	0.863096
3140	1	0.660714	0.928571	1	0.8125	0.944056	0.846154	0.878963	0.839269
3150	1	0.714286	0.928571	1	0.8125	0.965035	0.846154	0.896254	0.862904
3160	1	0.696429	0.928571	1	0.8125	0.965035	0.769231	0.89049	0.855268
3170	1	0.642857	0.928571	1	0.828125	0.937063	0.846154	0.876081	0.835182
3180	1	0.714286	1	1	0.828125	0.972028	0.769231	0.902017	0.870976
3190	1	0.714286	0.928571	1	0.84375	0.958042	0.769231	0.896254	0.862299
3200	1	0.660714	0.928571	1	0.8125	0.93007	0.769231	0.870317	0.827077
3210	1	0.678571	0.928571	1	0.78125	0.965035	0.769231	0.881844	0.844182
3220	1	0.732143	1	1	0.828125	0.965035	0.769231	0.902017	0.870509
3230	1	0.732143	1	1	0.8125	0.951049	0.846154	0.896254	0.862482
3240	1	0.678571	0.928571	1	0.828125	0.965035	0.846154	0.893372	0.859268
3250	1	0.732143	1	1	0.796875	0.965035	0.769231	0.896254	0.863106
3260	1	0.714286	0.928571	1	0.8125	0.965035	0.769231	0.893372	0.859031
3270	1	0.660714	0.928571	1	0.8125	0.965035	0.846154	0.887608	0.85183
3280	1	0.714286	1	1	0.8125	0.958042	0.769231	0.893372	0.858933
3290	1	0.696429	0.928571	1	0.8125	0.958042	0.769231	0.887608	0.851134
3300	1	0.678571	0.928571	1	0.8125	0.951049	0.769231	0.881844	0.843214
3310	1	0.642857	0.928571	1	0.828125	0.944056	0.923077	0.881844	0.843186
3320	1	0.660714	1	1	0.828125	0.958042	0.769231	0.887608	0.85151
3330	1	0.696429	0.928571	1	0.796875	0.951049	0.769231	0.881844	0.843236
3340	1	0.625	0.928571	1	0.828125	0.951049	0.769231	0.876081	0.835942
3350	1	0.696429	1	1	0.8125	0.958042	0.769231	0.89049	0.855
3360	1	0.678571	1	1	0.828125	0.937063	0.846154	0.884726	0.846723
3370	1	0.696429	0.928571	1	0.828125	0.958042	0.923077	0.896254	0.862656
3380	1	0.660714	1	1	0.84375	0.951049	0.769231	0.887608	0.851062
3390	1	0.696429	1	1	0.796875	0.944056	0.769231	0.881844	0.843193
3400	1	0.696429	0.928571	1	0.8125	0.951049	0.846154	0.887608	0.850856
3410	1	0.660714	0.928571	1	0.84375	0.958042	0.769231	0.887608	0.851152
3420	1	0.678571	1	1	0.828125	0.944056	0.769231	0.884726	0.846941
3430	1	0.678571	0.928571	1	0.8125	0.944056	0.846154	0.881844	0.842983
3440	1	0.714286	0.928571	1	0.828125	0.965035	0.846154	0.899135	0.866591
3450	1	0.660714	1	1	0.828125	0.965035	0.769231	0.89049	0.855718
3460	1	0.714286	0.928571	1	0.8125	0.958042	0.769231	0.89049	0.854819
3470	1	0.678571	1	1	0.828125	0.965035	0.846154	0.896254	0.863371
3480	1	0.714286	0.928571	1	0.78125	0.965035	0.846154	0.89049	0.855485
3490	1	0.696429	0.928571	1	0.84375	0.958042	0.769231	0.893372	0.858572
3500	1	0.732143	0.928571	1	0.859375	0.965035	0.769231	0.904899	0.8739
3510	1	0.678571	0.928571	1	0.78125	0.965035	0.846154	0.884726	0.848111
3520	1	0.642857	0.928571	1	0.828125	0.951049	0.769231	0.878963	0.839455
3530	1	0.678571	1	1	0.8125	0.972028	0.769231	0.893372	0.85994
3540	1	0.696429	0.928571	1	0.828125	0.958042	0.769231	0.89049	0.8547
3550	1	0.660714	0.928571	0.9375	0.8125	0.937063	0.769231	0.870317	0.827256
3560	1	0.678571	1	1	0.828125	0.944056	0.846154	0.887608	0.850835
3570	1	0.678571	1	1	0.8125	0.951049	0.692308	0.881844	0.843304
3580	1	0.678571	0.928571	1	0.8125	0.972028	0.846154	0.893372	0.859748
3590	1	0.660714	0.928571	1	0.828125	0.958042	0.846154	0.887608	0.85134
3600	1	0.660714	1	0.9375	0.84375	0.958042	0.769231	0.887608	0.851252
3610	1	0.696429	0.928571	1	0.796875	0.937063	0.846154	0.878963	0.838866
3620	1	0.696429	1	0.9375	0.828125	0.944056	0.769231	0.884726	0.84677
3630	1	0.696429	1	1	0.8125	0.958042	0.769231	0.89049	0.855225
3640	1	0.696429	1	1	0.828125	0.958042	0.846154	0.896254	0.86285
3650	1	0.696429	1	1	0.8125	0.972028	0.846154	0.899135	0.867524
3660	1	0.696429	0.928571	1	0.8125	0.951049	0.769231	0.884726	0.846974
3670	1	0.696429	0.928571	1	0.828125	0.958042	0.769231	0.89049	0.854905
3680	1	0.678571	0.928571	1	0.828125	0.958042	0.769231	0.887608	0.851113
3690	1	0.696429	1	1	0.78125	0.965035	0.846154	0.89049	0.855948
3700	1	0.714286	0.928571	1	0.78125	0.972028	0.769231	0.89049	0.85588
3710	1	0.714286	0.928571	1	0.796875	0.944056	0.769231	0.881844	0.842831
3720	1	0.660714	0.928571	1	0.84375	0.958042	0.846154	0.89049	0.855059
3730	1	0.696429	0.928571	1	0.828125	0.958042	0.769231	0.89049	0.854828
3740	1	0.660714	1	0.9375	0.8125	0.965035	0.769231	0.884726	0.848196
3750	1	0.678571	0.928571	0.9375	0.828125	0.958042	0.769231	0.884726	0.847257
3760	1	0.678571	1	1	0.828125	0.965035	0.769231	0.893372	0.85946
3770	1	0.696429	0.928571	1	0.8125	0.937063	0.769231	0.878963	0.838723
3780	1	0.660714	1	1	0.828125	0.951049	0.769231	0.884726	0.847344
3790	1	0.696429	0.928571	1	0.828125	0.958042	0.769231	0.89049	0.854819
3800	1	0.660714	0.928571	1	0.78125	0.951049	0.923077	0.878963	0.839918
3810	1	0.678571	0.928571	1	0.8125	0.944056	0.846154	0.881844	0.84301
3820	1	0.678571	1	1	0.828125	0.958042	0.769231	0.89049	0.855227
3830	1	0.660714	0.928571	1	0.8125	0.944056	0.769231	0.876081	0.835169
3840	1	0.678571	0.928571	1	0.8125	0.951049	0.769231	0.881844	0.843212
3850	1	0.696429	0.928571	1	0.84375	0.972028	0.769231	0.899135	0.866923
3860	1	0.642857	0.928571	1	0.8125	0.951049	0.769231	0.876081	0.835773
3870	1	0.696429	0.928571	1	0.796875	0.958042	0.769231	0.884726	0.847418
3880	1	0.642857	1	1	0.84375	0.972028	0.769231	0.893372	0.860061
3890	1	0.660714	0.928571	1	0.8125	0.958042	0.769231	0.881844	0.843718
3900	1	0.732143	0.928571	1	0.8125	0.972028	0.769231	0.899135	0.86689
3910	1	0.696429	1	1	0.84375	0.958042	0.846154	0.899135	0.866553
3920	1	0.75	0.928571	1	0.78125	0.951049	0.769231	0.887608	0.850728
3930	1	0.696429	0.928571	1	0.796875	0.958042	0.846154	0.887608	0.851285
3940	1	0.642857	0.928571	0.9375	0.8125	0.965035	0.846154	0.881844	0.844288
3950	1	0.678571	1	1	0.84375	0.972028	0.769231	0.899135	0.867313
3960	1	0.660714	0.928571	1	0.8125	0.965035	0.769231	0.884726	0.847907
3970	1	0.625	0.928571	1	0.859375	0.958042	0.769231	0.884726	0.847299
3980	1	0.660714	1	1	0.859375	0.965035	0.769231	0.896254	0.863195
3990	1	0.678571	1	1	0.8125	0.965035	0.769231	0.89049	0.855788
4000	1	0.678571	0.928571	1	0.8125	0.965035	0.846154	0.89049	0.85556
4010	1	0.678571	0.928571	1	0.828125	0.958042	0.769231	0.887608	0.851152
4020	1	0.678571	1	0.9375	0.84375	0.944056	0.769231	0.884726	0.84677
4030	1	0.696429	0.928571	0.9375	0.84375	0.958042	0.769231	0.89049	0.8547
4040	1	0.660714	1	1	0.8125	0.951049	0.692308	0.878963	0.839747
4050	1	0.660714	1	1	0.796875	0.965035	0.769231	0.884726	0.848437
4060	1	0.696429	1	1	0.8125	0.979021	0.846154	0.902017	0.871781
4070	1	0.696429	1	1	0.8125	0.937063	0.769231	0.881844	0.842834
4080	1	0.696429	1	1	0.796875	0.937063	0.769231	0.878963	0.839074
4090	1	0.732143	0.928571	1	0.796875	0.951049	0.769231	0.887608	0.850693
4100	1	0.714286	1	1	0.828125	0.958042	0.769231	0.896254	0.862684
4110	1	0.696429	1	1	0.828125	0.944056	0.846154	0.89049	0.854572
4120	1	0.732143	0.928571	1	0.828125	0.958042	0.846154	0.899135	0.866219
4130	1	0.714286	0.928571	1	0.78125	0.951049	0.846154	0.884726	0.847136
4140	1	0.696429	0.928571	1	0.828125	0.972028	0.846154	0.899135	0.867082
4150	1	0.696429	1	1	0.828125	0.979021	0.846154	0.904899	0.875268
4160	1	0.714286	0.928571	1	0.828125	0.965035	0.769231	0.896254	0.862778
4170	1	0.696429	0.928571	1	0.84375	0.937063	0.769231	0.884726	0.846185
4180	1	0.678571	0.928571	1	0.8125	0.958042	0.769231	0.884726	0.847203
4190	1	0.696429	0.928571	1	0.828125	0.951049	0.846154	0.89049	0.854643
4200	1	0.660714	1	1	0.8125	0.965035	0.923077	0.893372	0.859885
4210	1	0.696429	1	0.9375	0.859375	0.944056	0.769231	0.89049	0.854324
4220	1	0.714286	0.928571	1	0.84375	0.951049	0.769231	0.893372	0.858196
4230	1	0.678571	0.928571	1	0.828125	0.944056	0.769231	0.881844	0.842845
4240	1	0.678571	1	1	0.84375	0.951049	0.846154	0.893372	0.858694
4250	1	0.732143	1	0.9375	0.8125	0.951049	0.846154	0.893372	0.858521
4260	1	0.714286	0.928571	1	0.8125	0.951049	0.846154	0.89049	0.854588
4270	1	0.607143	1	1	0.8125	0.951049	0.769231	0.873199	0.832584
4280	1	0.714286	0.928571	1	0.828125	0.93007	0.846154	0.884726	0.846137
4290	1	0.696429	0.928571	0.9375	0.796875	0.951049	0.769231	0.878963	0.838924
4300	1	0.696429	0.928571	0.9375	0.828125	0.958042	0.769231	0.887608	0.850966
4310	1	0.696429	0.928571	1	0.78125	0.972028	0.769231	0.887608	0.8522
4320	1	0.678571	0.928571	1	0.8125	0.958042	0.769231	0.884726	0.847374
4330	1	0.660714	0.928571	1	0.796875	0.944056	0.846154	0.876081	0.835515
4340	1	0.696429	0.928571	1	0.8125	0.951049	0.769231	0.884726	0.846784
4350	1	0.660714	1	1	0.828125	0.958042	0.846154	0.89049	0.855439
4360	1	0.678571	0.928571	1	0.796875	0.972028	0.769231	0.887608	0.852129
4370	1	0.732143	0.928571	0.9375	0.796875	0.958042	0.846154	0.89049	0.854837
4380	1	0.678571	0.928571	0.9375	0.796875	0.958042	0.769231	0.878963	0.839562
4390	1	0.678571	0.928571	1	0.796875	0.958042	0.769231	0.881844	0.843662
4400	1	0.696429	0.928571	1	0.78125	0.958042	0.923077	0.887608	0.851525
4410	1	0.696429	1	1	0.8125	0.951049	0.769231	0.887608	0.851062
4420	1	0.696429	1	1	0.828125	0.951049	0.769231	0.89049	0.854821
4430	1	0.732143	0.928571	1	0.828125	0.958042	0.846154	0.899135	0.866219
4440	1	0.678571	0.928571	1	0.796875	0.972028	0.846154	0.89049	0.856057
4450	1	0.678571	0.928571	0.9375	0.828125	0.972028	0.769231	0.89049	0.855446
4460	1	0.660714	0.928571	1	0.828125	0.958042	0.769231	0.884726	0.84741
4470	1	0.696429	1	1	0.78125	0.958042	0.769231	0.884726	0.847863
4480	1	0.714286	0.928571	0.9375	0.84375	0.951049	0.846154	0.893372	0.858192
4490	1	0.714286	0.928571	1	0.828125	0.951049	0.846154	0.893372	0.858366
4500	1	0.678571	0.928571	1	0.8125	0.951049	0.769231	0.881844	0.843229
4510	1	0.696429	0.857143	1	0.84375	0.965035	0.846154	0.896254	0.862394
4520	1	0.678571	0.928571	1	0.84375	0.944056	0.846154	0.887608	0.850577
4530	1	0.678571	0.928571	1	0.796875	0.965035	0.769231	0.884726	0.847948
4540	1	0.642857	0.928571	1	0.78125	0.944056	0.846154	0.870317	0.828077
4550	1	0.714286	0.928571	1	0.828125	0.958042	0.769231	0.893372	0.858417
4560	1	0.678571	0.928571	0.9375	0.78125	0.944056	0.846154	0.873199	0.831578
4570	1	0.678571	0.928571	1	0.828125	0.951049	0.692308	0.881844	0.843102
4580	1	0.714286	0.928571	1	0.84375	0.951049	0.846154	0.896254	0.862098
4590	1	0.660714	1	1	0.828125	0.951049	0.769231	0.884726	0.847375
4600	1	0.696429	0.928571	1	0.828125	0.951049	0.846154	0.89049	0.854622
4610	1	0.642857	1	1	0.8125	0.944056	0.692308	0.873199	0.831845
4620	1	0.678571	0.928571	1	0.8125	0.944056	0.846154	0.881844	0.842983
4630	1	0.642857	0.928571	1	0.78125	0.958042	0.769231	0.873199	0.832657
4640	1	0.678571	0.928571	1	0.796875	0.958042	0.769231	0.881844	0.84368
4650	1	0.696429	0.928571	1	0.84375	0.958042	0.769231	0.893372	0.858466
4660	1	0.696429	0.928571	1	0.796875	0.951049	0.846154	0.884726	0.847136
4670	1	0.660714	1	1	0.828125	0.972028	0.846154	0.896254	0.863921
4680	1	0.714286	1	1	0.8125	0.93007	0.769231	0.881844	0.842508
4690	1	0.696429	0.928571	1	0.828125	0.958042	0.769231	0.89049	0.85489
4700	1	0.660714	0.928571	0.9375	0.828125	0.951049	0.769231	0.878963	0.83896
4710	1	0.678571	0.928571	1	0.828125	0.965035	0.769231	0.89049	0.855364
4720	1	0.696429	1	1	0.859375	0.958042	0.769231	0.899135	0.8664
4730	1	0.660714	0.928571	1	0.796875	0.958042	0.769231	0.878963	0.839961
4740	1	0.696429	0.928571	1	0.796875	0.944056	0.769231	0.878963	0.839074
4750	1	0.660714	0.928571	1	0.859375	0.965035	0.769231	0.893372	0.859097
4760	1	0.642857	0.928571	1	0.796875	0.958042	0.769231	0.876081	0.836254
4770	1	0.678571	0.928571	1	0.84375	0.944056	0.846154	0.887608	0.850485
4780	1	0.660714	0.928571	1	0.796875	0.965035	0.923077	0.887608	0.852084
4790	1	0.678571	1	1	0.796875	0.965035	0.846154	0.89049	0.855954
4800	1	0.75	0.928571	1	0.828125	0.951049	0.692308	0.893372	0.858138
4810	1	0.678571	0.928571	1	0.828125	0.972028	0.769231	0.893372	0.859571
4820	1	0.714286	1	1	0.796875	0.958042	0.769231	0.89049	0.855216
4830	1	0.696429	0.928571	1	0.796875	0.951049	0.769231	0.881844	0.843214
4840	1	0.660714	0.928571	1	0.828125	0.958042	0.769231	0.884726	0.847241
4850	1	0.660714	0.928571	1	0.8125	0.965035	0.846154	0.887608	0.851973
4860	1	0.732143	0.928571	1	0.78125	0.923077	0.769231	0.873199	0.830677
4870	1	0.678571	0.928571	1	0.828125	0.951049	0.769231	0.884726	0.846982
4880	1	0.660714	0.928571	1	0.78125	0.944056	0.769231	0.870317	0.827654
4890	1	0.642857	0.928571	1	0.78125	0.958042	0.692308	0.870317	0.828524
4900	1	0.696429	0.928571	0.9375	0.78125	0.937063	0.846154	0.873199	0.83117
4910	1	0.660714	1	0.9375	0.828125	0.951049	0.846154	0.884726	0.84735
4920	1	0.678571	0.928571	1	0.84375	0.958042	0.923077	0.896254	0.862736
4930	1	0.678571	1	1	0.78125	0.944056	0.846154	0.878963	0.839641
4940	1	0.696429	0.928571	1	0.84375	0.958042	0.769231	0.893372	0.858639
4950	1	0.696429	0.928571	1	0.8125	0.972028	0.846154	0.896254	0.863409
4960	1	0.660714	0.928571	1	0.796875	0.937063	0.769231	0.870317	0.827281
4970	1	0.642857	1	1	0.828125	0.951049	0.769231	0.881844	0.843502
4980	1	0.678571	0.928571	1	0.828125	0.958042	0.846154	0.89049	0.855037
4990	1	0.678571	0.928571	1	0.828125	0.944056	0.846154	0.884726	0.846779
5000	1	0.678571	1	1	0.828125	0.965035	0.769231	0.893372	0.85946
5010	1	0.696429	0.928571	1	0.828125	0.958042	0.846154	0.893372	0.858786
5020	1	0.678571	0.928571	1	0.828125	0.951049	0.846154	0.887608	0.850901
5030	1	0.678571	0.928571	1	0.8125	0.951049	0.769231	0.881844	0.843291
5040	1	0.696429	0.928571	1	0.796875	0.958042	0.769231	0.884726	0.847418
5050	1	0.696429	1	1	0.828125	0.965035	0.846154	0.899135	0.867072
5060	1	0.714286	1	1	0.78125	0.951049	0.846154	0.887608	0.851249
5070	1	0.732143	1	0.9375	0.84375	0.951049	0.769231	0.896254	0.862109
5080	1	0.678571	0.928571	1	0.828125	0.958042	0.769231	0.887608	0.851152
5090	1	0.696429	0.928571	1	0.796875	0.93007	0.769231	0.873199	0.830716
5100	1	0.714286	1	1	0.78125	0.972028	0.769231	0.893372	0.860051
5110	1	0.696429	1	0.9375	0.78125	0.972028	0.846154	0.89049	0.856338
5120	1	0.678571	0.928571	1	0.78125	0.958042	0.846154	0.881844	0.843876
5130	1	0.714286	0.928571	1	0.84375	0.951049	0.692308	0.89049	0.854335
5140	1	0.660714	0.928571	1	0.8125	0.965035	0.769231	0.884726	0.847934
5150	1	0.714286	0.928571	1	0.84375	0.965035	0.769231	0.899135	0.866284
5160	1	0.678571	0.928571	1	0.828125	0.951049	0.769231	0.884726	0.846784
5170	1	0.696429	0.928571	1	0.84375	0.951049	0.769231	0.89049	0.854523
5180	1	0.732143	0.928571	1	0.796875	0.965035	0.846154	0.896254	0.862922
5190	1	0.696429	0.928571	0.9375	0.8125	0.937063	0.769231	0.876081	0.834739
5200	1	0.696429	1	1	0.796875	0.944056	0.846154	0.884726	0.847116
5210	1	0.696429	0.857143	1	0.828125	0.951049	0.923077	0.89049	0.854515
5220	1	0.714286	0.928571	1	0.8125	0.951049	0.769231	0.887608	0.850709
5230	1	0.678571	1	1	0.828125	0.972028	0.769231	0.896254	0.863651
5240	1	0.660714	0.928571	1	0.796875	0.937063	0.769231	0.870317	0.827266
5250	1	0.678571	0.928571	1	0.84375	0.951049	0.846154	0.89049	0.854605
5260	1	0.660714	0.928571	1	0.828125	0.958042	0.846154	0.887608	0.851371
5270	1	0.660714	0.928571	1	0.828125	0.958042	0.769231	0.884726	0.847458
5280	1	0.642857	1	0.9375	0.828125	0.951049	0.846154	0.881844	0.843477
5290	1	0.678571	0.928571	1	0.828125	0.972028	0.769231	0.893372	0.859493
5300	1	0.625	0.928571	1	0.8125	0.951049	0.769231	0.873199	0.832116
5310	1	0.678571	0.928571	1	0.796875	0.958042	0.769231	0.881844	0.843662
5320	1	0.696429	1	0.875	0.8125	0.944056	0.923077	0.884726	0.846943
5330	1	0.696429	1	0.875	0.796875	0.951049	0.923077	0.884726	0.847156
5340	1	0.696429	0.928571	1	0.8125	0.979021	0.923077	0.902017	0.871583
5350	1	0.696429	0.928571	1	0.78125	0.958042	0.769231	0.881844	0.843662
5360	1	0.696429	0.928571	1	0.8125	0.958042	0.923077	0.893372	0.858953
5370	1	0.75	0.928571	1	0.828125	0.944056	0.769231	0.893372	0.857928
5380	1	0.714286	0.928571	1	0.78125	0.958042	0.769231	0.884726	0.847461
5390	1	0.678571	1	1	0.828125	0.937063	0.846154	0.884726	0.846747
5400	1	0.714286	0.928571	1	0.8125	0.937063	0.846154	0.884726	0.846398
5410	1	0.678571	0.928571	1	0.828125	0.951049	0.846154	0.887608	0.850856
5420	1	0.696429	1	1	0.8125	0.965035	0.846154	0.896254	0.863318
5430	1	0.678571	1	1	0.796875	0.965035	0.769231	0.887608	0.852026
5440	1	0.714286	0.857143	1	0.8125	0.951049	0.846154	0.887608	0.850504
5450	1	0.714286	1	1	0.796875	0.958042	0.769231	0.89049	0.855227
5460	1	0.642857	0.928571	1	0.796875	0.951049	0.769231	0.873199	0.832037
5470	1	0.732143	1	1	0.8125	0.951049	0.769231	0.893372	0.858531
5480	1	0.642857	0.928571	1	0.84375	0.958042	0.846154	0.887608	0.851388
5490	1	0.714286	0.928571	1	0.828125	0.944056	0.769231	0.887608	0.850371
5500	1	0.696429	0.928571	1	0.8125	0.951049	0.769231	0.884726	0.846982
5510	1	0.732143	0.785714	1	0.828125	0.951049	0.769231	0.887608	0.849921
5520	1	0.696429	0.928571	1	0.78125	0.937063	0.769231	0.873199	0.831215
5530	1	0.678571	1	1	0.8125	0.958042	0.846154	0.89049	0.85542
5540	1	0.642857	0.928571	0.9375	0.75	0.951049	0.769231	0.861671	0.817069
5550	1	0.642857	0.928571	1	0.78125	0.958042	0.846154	0.876081	0.836236
5560	1	0.660714	0.928571	1	0.828125	0.951049	0.769231	0.881844	0.843105
5570	1	0.625	0.928571	1	0.796875	0.965035	0.846154	0.878963	0.840874
5580	1	0.696429	0.928571	1	0.8125	0.965035	0.769231	0.89049	0.855335
5590	1	0.678571	1	0.9375	0.8125	0.965035	0.846154	0.89049	0.855752
5600	1	0.714286	1	1	0.828125	0.951049	0.846154	0.896254	0.86242
5610	1	0.660714	1	1	0.796875	0.951049	0.846154	0.881844	0.843856
5620	1	0.696429	1	0.9375	0.828125	0.944056	0.769231	0.884726	0.846765
5630	1	0.678571	0.928571	1	0.828125	0.951049	0.769231	0.884726	0.847049
5640	1	0.732143	1	1	0.796875	0.979021	0.769231	0.902017	0.871323
5650	1	0.660714	1	1	0.84375	0.965035	0.769231	0.893372	0.859421
5660	1	0.696429	0.928571	1	0.796875	0.965035	0.846154	0.89049	0.855572
5670	1	0.660714	0.928571	1	0.796875	0.958042	0.769231	0.878963	0.839807
5680	1	0.660714	0.928571	1	0.8125	0.965035	0.846154	0.887608	0.851879
5690	1	0.75	0.928571	1	0.828125	0.951049	0.769231	0.896254	0.861958
5700	1	0.714286	0.928571	1	0.8125	0.958042	0.846154	0.893372	0.858729
5710	1	0.642857	0.928571	1	0.828125	0.916084	0.769231	0.864553	0.81897
5720	1	0.714286	0.928571	1	0.796875	0.951049	0.769231	0.884726	0.846959
5730	1	0.75	0.928571	0.9375	0.8125	0.958042	0.692308	0.89049	0.854003
5740	1	0.625	0.928571	0.9375	0.796875	0.958042	0.846154	0.873199	0.832632
5750	1	0.660714	0.928571	1	0.84375	0.965035	0.769231	0.89049	0.855414
5760	1	0.696429	0.928571	1	0.828125	0.958042	0.846154	0.893372	0.858815
5770	1	0.660714	0.928571	1	0.828125	0.944056	0.769231	0.878963	0.839114
5780	1	0.660714	0.928571	0.9375	0.78125	0.972028	0.846154	0.881844	0.844846
5790	1	0.678571	1	1	0.84375	0.937063	0.769231	0.884726	0.84648
5800	1	0.625	0.928571	1	0.796875	0.958042	0.769231	0.873199	0.832637
5810	1	0.678571	0.928571	0.875	0.8125	0.972028	0.769231	0.884726	0.84777
5820	1	0.678571	0.928571	1	0.8125	0.951049	0.769231	0.881844	0.843266
5830	1	0.642857	1	1	0.8125	0.951049	0.769231	0.878963	0.839986
5840	1	0.660714	1	1	0.796875	0.951049	0.769231	0.878963	0.839986
5850	1	0.678571	1	0.9375	0.796875	0.958042	0.769231	0.881844	0.843657
5860	1	0.678571	0.928571	1	0.828125	0.979021	0.692308	0.893372	0.859841
5870	1	0.696429	1	0.9375	0.84375	0.972028	0.846154	0.902017	0.871125
5880	1	0.625	0.928571	0.9375	0.84375	0.965035	0.769231	0.881844	0.843903
5890	1	0.678571	0.928571	1	0.8125	0.972028	0.769231	0.89049	0.855788
5900	1	0.660714	1	1	0.8125	0.951049	0.769231	0.881844	0.843673
5910	1	0.678571	0.928571	1	0.78125	0.965035	0.769231	0.881844	0.843948
5920	1	0.696429	0.928571	1	0.828125	0.965035	0.769231	0.893372	0.858998
5930	1	0.678571	1	1	0.796875	0.951049	0.769231	0.881844	0.843636
5940	1	0.642857	0.928571	1	0.796875	0.972028	0.769231	0.881844	0.84479
5950	1	0.660714	0.928571	1	0.828125	0.958042	0.615385	0.878963	0.83943
5960	1	0.696429	0.928571	1	0.796875	0.979021	0.769231	0.893372	0.860058
5970	1	0.642857	0.928571	1	0.8125	0.937063	0.846154	0.873199	0.831458
5980	1	0.660714	0.928571	0.875	0.796875	0.951049	0.846154	0.873199	0.831705
5990	1	0.714286	0.928571	0.9375	0.8125	0.944056	0.769231	0.881844	0.84266
6000	1	0.678571	0.928571	0.9375	0.828125	0.972028	0.769231	0.89049	0.855269
6010	1	0.571429	1	1	0.8125	0.965035	0.769231	0.873199	0.833652
6020	1	0.660714	0.928571	1	0.828125	0.951049	0.769231	0.881844	0.843171
6030	1	0.696429	0.928571	1	0.8125	0.951049	0.846154	0.887608	0.850848
6040	1	0.678571	0.928571	1	0.78125	0.93007	0.846154	0.870317	0.827238
6050	1	0.642857	0.857143	0.9375	0.8125	0.944056	0.769231	0.867435	0.823689
6060	1	0.642857	0.928571	1	0.78125	0.951049	0.846154	0.873199	0.832342
6070	1	0.696429	0.928571	1	0.796875	0.965035	0.769231	0.887608	0.851569
6080	1	0.660714	0.928571	1	0.828125	0.965035	0.846154	0.89049	0.85562
6090	1	0.678571	0.928571	1	0.796875	0.958042	0.769231	0.881844	0.84373
6100	1	0.696429	0.928571	1	0.8125	0.972028	0.769231	0.893372	0.859485
6110	1	0.660714	0.928571	1	0.796875	0.951049	0.692308	0.873199	0.83191
6120	1	0.678571	0.928571	1	0.828125	0.965035	0.846154	0.893372	0.859268
6130	1	0.660714	0.928571	1	0.828125	0.965035	0.769231	0.887608	0.851475
6140	1	0.625	0.928571	1	0.828125	0.937063	0.846154	0.873199	0.831403
6150	1	0.696429	0.857143	0.9375	0.796875	0.965035	0.769231	0.881844	0.843406
6160	1	0.732143	1	1	0.8125	0.93007	0.769231	0.884726	0.846286
6170	1	0.678571	0.928571	1	0.796875	0.958042	0.846154	0.884726	0.847636
6180	1	0.678571	1	1	0.828125	0.979021	0.846154	0.902017	0.871837
6190	1	0.625	0.928571	1	0.796875	0.972028	0.846154	0.881844	0.845093
6200	1	0.714286	0.928571	0.9375	0.8125	0.944056	0.692308	0.878963	0.838639
6210	1	0.678571	0.928571	0.9375	0.796875	0.958042	0.769231	0.878963	0.839642
6220	1	0.642857	0.928571	0.9375	0.8125	0.972028	0.769231	0.881844	0.844144
6230	1	0.642857	1	0.9375	0.828125	0.937063	0.846154	0.876081	0.835191
6240	1	0.678571	0.928571	1	0.78125	0.937063	0.923077	0.876081	0.835338
6250	1	0.660714	0.928571	0.9375	0.828125	0.944056	0.769231	0.876081	0.835215
6260	1	0.696429	0.928571	0.9375	0.8125	0.944056	0.923077	0.884726	0.846733
6270	1	0.678571	0.928571	1	0.828125	0.944056	0.846154	0.884726	0.846853
6280	1	0.678571	0.928571	1	0.796875	0.944056	0.846154	0.878963	0.839119
6290	1	0.678571	0.928571	1	0.78125	0.958042	0.769231	0.878963	0.839961
6300	1	0.678571	0.928571	1	0.78125	0.951049	0.923077	0.881844	0.843619
6310	1	0.660714	0.928571	1	0.8125	0.972028	0.769231	0.887608	0.851992
6320	1	0.696429	0.928571	1	0.8125	0.951049	0.769231	0.884726	0.846784
6330	1	0.678571	1	1	0.796875	0.944056	0.692308	0.876081	0.835382
6340	1	0.678571	0.928571	0.9375	0.8125	0.951049	0.846154	0.881844	0.843321
6350	1	0.678571	0.928571	0.9375	0.8125	0.958042	0.846154	0.884726	0.847429
6360	1	0.678571	0.928571	1	0.796875	0.944056	0.769231	0.876081	0.835344
6370	1	0.678571	0.928571	1	0.8125	0.965035	0.769231	0.887608	0.851625
6380	1	0.678571	1	1	0.8125	0.937063	0.769231	0.878963	0.838944
6390	1	0.678571	0.928571	0.875	0.828125	0.951049	0.769231	0.878963	0.839192
6400	1	0.642857	0.928571	1	0.8125	0.951049	0.769231	0.876081	0.835773
6410	1	0.714286	0.928571	1	0.828125	0.951049	0.692308	0.887608	0.850567
6420	1	0.678571	1	1	0.8125	0.965035	0.769231	0.89049	0.855818
6430	1	0.678571	0.928571	1	0.8125	0.958042	0.769231	0.884726	0.84741
6440	1	0.660714	1	1	0.828125	0.965035	0.846154	0.893372	0.859633
6450	1	0.678571	1	1	0.796875	0.944056	0.769231	0.878963	0.83948
6460	1	0.678571	0.928571	0.9375	0.796875	0.93007	0.923077	0.873199	0.830959
6470	1	0.660714	0.857143	1	0.796875	0.951049	0.769231	0.873199	0.831726
6480	1	0.678571	1	1	0.796875	0.951049	0.846154	0.884726	0.847423
6490	1	0.678571	0.928571	1	0.828125	0.958042	0.846154	0.89049	0.855037
6500	1	0.660714	0.928571	1	0.796875	0.972028	0.846154	0.887608	0.852408
6510	1	0.678571	0.928571	1	0.8125	0.944056	0.846154	0.881844	0.842983
6520	1	0.678571	1	1	0.796875	0.958042	0.769231	0.884726	0.847871
6530	1	0.714286	0.928571	1	0.828125	0.958042	0.769231	0.893372	0.858581
6540	1	0.696429	0.928571	1	0.828125	0.951049	0.769231	0.887608	0.850761
6550	1	0.696429	0.928571	1	0.796875	0.951049	0.769231	0.881844	0.843212
6560	1	0.714286	0.928571	1	0.828125	0.965035	0.769231	0.896254	0.862748
6570	1	0.678571	1	1	0.78125	0.944056	0.769231	0.876081	0.835533
6580	1	0.714286	0.928571	1	0.84375	0.951049	0.769231	0.893372	0.858214
6590	1	0.642857	0.857143	0.9375	0.828125	0.958042	0.769231	0.876081	0.835884
6600	1	0.678571	1	0.9375	0.828125	0.944056	0.923077	0.887608	0.850809
6610	1	0.642857	1	1	0.796875	0.951049	0.692308	0.873199	0.832349
6620	1	0.714286	0.928571	1	0.8125	0.958042	0.692308	0.887608	0.850776
6630	1	0.642857	0.857143	1	0.796875	0.958042	0.769231	0.873199	0.831943
6640	1	0.696429	1	1	0.796875	0.965035	0.769231	0.89049	0.855513
6650	1	0.625	0.928571	0.9375	0.8125	0.944056	0.846154	0.870317	0.827665
6660	1	0.660714	0.928571	1	0.8125	0.951049	0.769231	0.878963	0.839398
6670	1	0.678571	0.928571	0.9375	0.796875	0.965035	0.769231	0.881844	0.844096
6680	1	0.642857	0.785714	0.9375	0.8125	0.944056	0.769231	0.864553	0.819276
6690	1	0.678571	0.928571	1	0.8125	0.958042	0.923077	0.89049	0.855232
6700	1	0.678571	0.928571	1	0.828125	0.965035	0.769231	0.89049	0.85514
6710	1	0.678571	0.928571	0.9375	0.8125	0.958042	0.769231	0.881844	0.843499
6720	1	0.678571	0.928571	1	0.796875	0.958042	0.769231	0.881844	0.84368
6730	1	0.642857	0.928571	0.9375	0.8125	0.958042	0.769231	0.876081	0.835748
6740	1	0.678571	0.928571	1	0.78125	0.958042	0.769231	0.878963	0.840044
6750	1	0.678571	1	0.9375	0.828125	0.958042	0.692308	0.884726	0.847296
6760	1	0.696429	0.857143	1	0.796875	0.951049	0.846154	0.881844	0.843193
6770	1	0.625	1	1	0.796875	0.937063	0.769231	0.867435	0.823942
6780	1	0.696429	0.928571	0.9375	0.8125	0.944056	0.769231	0.878963	0.83896
6790	1	0.678571	0.928571	1	0.78125	0.958042	0.769231	0.878963	0.839961
6800	1	0.589286	1	0.9375	0.8125	0.944056	0.769231	0.864553	0.820537
6810	1	0.642857	0.928571	1	0.796875	0.944056	0.846154	0.873199	0.83177
6820	1	0.678571	0.928571	1	0.796875	0.951049	0.769231	0.878963	0.839341
6830	1	0.642857	0.928571	1	0.796875	0.958042	0.846154	0.878963	0.8402
6840	1	0.696429	0.928571	1	0.796875	0.951049	0.769231	0.881844	0.843229
6850	1	0.660714	0.857143	1	0.765625	0.958042	0.769231	0.870317	0.828208
6860	1	0.678571	1	1	0.828125	0.951049	0.769231	0.887608	0.85096
6870	1	0.642857	0.928571	1	0.796875	0.937063	0.923077	0.873199	0.831621
6880	1	0.660714	1	1	0.8125	0.958042	0.769231	0.884726	0.847948
6890	1	0.660714	0.928571	0.9375	0.8125	0.965035	0.769231	0.881844	0.844058
6900	1	0.678571	0.928571	0.9375	0.8125	0.958042	0.769231	0.881844	0.843532
6910	1	0.625	0.928571	1	0.84375	0.958042	0.769231	0.881844	0.843825
6920	1	0.660714	0.928571	1	0.796875	0.951049	0.846154	0.878963	0.839573
6930	1	0.678571	0.857143	1	0.796875	0.958042	0.769231	0.878963	0.839352
6940	1	0.678571	1	0.9375	0.828125	0.972028	0.846154	0.896254	0.863598
6950	1	0.660714	0.857143	1	0.78125	0.951049	0.769231	0.870317	0.827871
6960	1	0.642857	1	1	0.78125	0.965035	0.846154	0.881844	0.844793
6970	1	0.642857	1	0.9375	0.78125	0.944056	0.923077	0.873199	0.832257
6980	1	0.607143	0.928571	1	0.796875	0.958042	0.692308	0.867435	0.825053
6990	1	0.607143	0.928571	1	0.796875	0.972028	0.769231	0.876081	0.83738
7000	1	0.678571	0.928571	1	0.8125	0.944056	0.923077	0.884726	0.846911
7010	1	0.642857	0.928571	1	0.8125	0.958042	0.923077	0.884726	0.847911
7020	1	0.696429	0.928571	1	0.828125	0.965035	0.769231	0.893372	0.858998
7030	1	0.660714	0.928571	0.9375	0.828125	0.958042	0.769231	0.881844	0.843339
7040	1	0.678571	0.857143	0.9375	0.8125	0.972028	0.846154	0.887608	0.851448
7050	1	0.642857	1	1	0.8125	0.958042	0.769231	0.881844	0.844231
7060	1	0.678571	0.928571	1	0.796875	0.979021	0.769231	0.89049	0.856494
7070	1	0.678571	0.928571	0.9375	0.78125	0.937063	0.769231	0.867435	0.823515
7080	1	0.696429	0.928571	1	0.796875	0.958042	0.923077	0.89049	0.855223
7090	1	0.642857	0.928571	1	0.78125	0.951049	0.769231	0.870317	0.828377
7100	1	0.660714	1	1	0.78125	0.958042	0.846154	0.881844	0.844357
7110	1	0.642857	0.857143	1	0.796875	0.965035	0.769231	0.876081	0.836517
7120	1	0.660714	0.857143	1	0.8125	0.979021	0.846154	0.89049	0.856411
7130	1	0.732143	0.928571	1	0.78125	0.951049	0.769231	0.884726	0.847009
7140	1	0.678571	0.928571	0.9375	0.84375	0.965035	0.692308	0.887608	0.850892
7150	1	0.642857	0.928571	1	0.8125	0.958042	0.846154	0.881844	0.84404
7160	1	0.660714	0.928571	1	0.8125	0.944056	0.846154	0.878963	0.839289
7170	1	0.714286	0.928571	0.9375	0.796875	0.958042	0.846154	0.887608	0.850947
7180	1	0.678571	1	0.9375	0.796875	0.958042	0.769231	0.881844	0.843887
7190	1	0.660714	0.928571	1	0.84375	0.951049	0.769231	0.884726	0.847029
7200	1	0.589286	0.928571	0.9375	0.796875	0.958042	0.769231	0.864553	0.82108
7210	1	0.607143	0.928571	1	0.765625	0.944056	0.692308	0.855908	0.809115
7220	1	0.696429	0.928571	1	0.765625	0.958042	0.615385	0.873199	0.831742
7230	1	0.678571	0.928571	1	0.796875	0.951049	0.769231	0.878963	0.839487
7240	1	0.678571	0.928571	0.9375	0.796875	0.958042	0.769231	0.878963	0.839817
7250	1	0.678571	0.928571	0.9375	0.78125	0.958042	0.692308	0.873199	0.831918
7260	1	0.678571	0.928571	1	0.796875	0.965035	0.769231	0.884726	0.847976
7270	1	0.660714	0.928571	0.9375	0.78125	0.979021	0.769231	0.881844	0.844891
7280	1	0.660714	0.928571	0.875	0.78125	0.944056	0.769231	0.864553	0.819378
7290	1	0.660714	0.928571	1	0.8125	0.951049	0.923077	0.884726	0.847366
7300	1	0.642857	0.928571	1	0.828125	0.965035	0.769231	0.884726	0.847954
7310	1	0.660714	0.928571	1	0.796875	0.951049	0.769231	0.876081	0.835792
7320	1	0.642857	0.928571	1	0.8125	0.958042	0.846154	0.881844	0.843912
7330	1	0.625	1	0.9375	0.78125	0.972028	0.769231	0.876081	0.83759
7340	1	0.660714	0.928571	1	0.78125	0.944056	0.846154	0.873199	0.831773
7350	1	0.642857	0.857143	1	0.8125	0.951049	0.692308	0.870317	0.827543
7360	1	0.678571	1	1	0.796875	0.951049	0.769231	0.881844	0.84343
7370	1	0.607143	0.928571	1	0.8125	0.979021	0.692308	0.878963	0.841728
7380	1	0.660714	0.928571	1	0.8125	0.951049	0.769231	0.878963	0.839545
7390	1	0.642857	0.928571	1	0.78125	0.965035	0.692308	0.873199	0.832749
7400	1	0.696429	0.928571	1	0.796875	0.958042	0.769231	0.884726	0.847382
7410	1	0.696429	1	1	0.8125	0.958042	0.769231	0.89049	0.855216
7420	1	0.642857	0.928571	1	0.796875	0.958042	0.769231	0.876081	0.836332
7430	1	0.696429	0.857143	1	0.828125	0.93007	0.846154	0.878963	0.83832
7440	1	0.678571	0.928571	0.9375	0.796875	0.965035	0.846154	0.884726	0.847732
7450	1	0.714286	0.857143	1	0.796875	0.965035	0.769231	0.887608	0.850965
7460	1	0.660714	0.928571	1	0.84375	0.951049	0.769231	0.884726	0.847117
7470	1	0.660714	0.928571	0.875	0.828125	0.972028	0.846154	0.887608	0.852026
7480	1	0.642857	0.928571	0.9375	0.8125	0.958042	0.769231	0.876081	0.836078
7490	1	0.642857	1	0.9375	0.8125	0.951049	0.769231	0.876081	0.835984
7500	1	0.660714	1	1	0.796875	0.93007	0.846154	0.873199	0.83137
7510	1	0.660714	0.928571	1	0.828125	0.951049	0.846154	0.884726	0.847185
7520	1	0.660714	0.928571	0.9375	0.8125	0.951049	0.846154	0.878963	0.83952
7530	1	0.732143	0.928571	1	0.8125	0.958042	0.846154	0.896254	0.8625
7540	1	0.660714	0.928571	0.9375	0.765625	0.965035	0.769231	0.873199	0.832826
7550	1	0.660714	0.928571	1	0.8125	0.972028	0.769231	0.887608	0.852168
7560	1	0.678571	0.928571	1	0.8125	0.958042	0.769231	0.884726	0.847426
7570	1	0.642857	0.928571	0.9375	0.828125	0.958042	0.692308	0.876081	0.835735
7580	1	0.678571	1	1	0.828125	0.958042	0.846154	0.893372	0.85912
7590	1	0.678571	0.928571	0.9375	0.8125	0.937063	0.923077	0.878963	0.838717
7600	1	0.625	0.928571	1	0.8125	0.972028	0.769231	0.881844	0.844829
7610	1	0.714286	0.857143	1	0.78125	0.944056	0.846154	0.878963	0.838726
7620	1	0.660714	0.928571	1	0.8125	0.965035	0.846154	0.887608	0.851847
7630	1	0.660714	0.928571	0.9375	0.796875	0.958042	0.769231	0.876081	0.835635
7640	1	0.678571	0.928571	1	0.796875	0.937063	0.769231	0.873199	0.831208
7650	1	0.696429	0.928571	1	0.796875	0.951049	0.769231	0.881844	0.84303
7660	1	0.660714	0.928571	1	0.828125	0.944056	0.692308	0.876081	0.835048
7670	1	0.642857	0.928571	0.9375	0.828125	0.937063	0.769231	0.870317	0.827127
7680	1	0.660714	0.857143	1	0.8125	0.958042	0.769231	0.878963	0.839561
7690	1	0.678571	0.928571	1	0.796875	0.958042	0.846154	0.884726	0.847615
7700	1	0.642857	0.928571	1	0.796875	0.937063	0.769231	0.867435	0.823725
7710	1	0.625	1	0.9375	0.8125	0.958042	0.769231	0.876081	0.836429
7720	1	0.642857	0.857143	1	0.78125	0.944056	0.769231	0.864553	0.819604
7730	1	0.571429	0.857143	1	0.78125	0.965035	0.769231	0.861671	0.818163
7740	1	0.660714	0.928571	1	0.8125	0.958042	0.846154	0.884726	0.847653
7750	1	0.696429	0.857143	1	0.8125	0.937063	0.846154	0.878963	0.8387
7760	1	0.678571	0.928571	1	0.8125	0.944056	0.769231	0.878963	0.839154
7770	1	0.678571	0.928571	1	0.796875	0.958042	0.846154	0.884726	0.84771
7780	1	0.678571	0.928571	0.9375	0.8125	0.951049	0.769231	0.878963	0.839382
7790	1	0.696429	0.928571	1	0.8125	0.958042	0.769231	0.887608	0.851097
7800	1	0.642857	0.857143	0.9375	0.796875	0.951049	0.846154	0.870317	0.828129
7810	1	0.642857	1	0.9375	0.8125	0.958042	0.769231	0.878963	0.840042
7820	1	0.660714	1	0.9375	0.8125	0.944056	0.692308	0.873199	0.831646
7830	1	0.642857	0.928571	1	0.8125	0.944056	0.846154	0.876081	0.835545
7840	1	0.714286	0.857143	0.9375	0.796875	0.958042	0.692308	0.878963	0.839215
7850	1	0.625	1	0.9375	0.8125	0.965035	0.846154	0.881844	0.844796
7860	1	0.660714	0.928571	1	0.78125	0.944056	0.769231	0.870317	0.82768
7870	1	0.696429	0.928571	1	0.796875	0.951049	0.769231	0.881844	0.843291
7880	1	0.678571	0.928571	0.9375	0.828125	0.979021	0.846154	0.896254	0.863944
7890	1	0.625	0.928571	0.9375	0.75	0.965035	0.846154	0.867435	0.825732
7900	1	0.714286	0.857143	1	0.78125	0.951049	0.692308	0.876081	0.835355
7910	1	0.642857	1	0.9375	0.796875	0.958042	0.846154	0.878963	0.8402
7920	1	0.660714	0.928571	1	0.8125	0.965035	0.769231	0.884726	0.847878
7930	1	0.642857	0.928571	1	0.84375	0.958042	0.769231	0.884726	0.847659
7940	1	0.625	0.928571	0.9375	0.796875	0.944056	0.769231	0.864553	0.820032
7950	1	0.696429	1	0.9375	0.796875	0.972028	0.692308	0.887608	0.851758
7960	1	0.660714	0.928571	1	0.796875	0.958042	0.769231	0.878963	0.840016
7970	1	0.642857	0.928571	1	0.796875	0.965035	0.769231	0.878963	0.840399
7980	1	0.696429	0.857143	1	0.828125	0.958042	0.846154	0.89049	0.854709
7990	1	0.678571	0.857143	0.875	0.796875	0.951049	0.769231	0.870317	0.827605
8000	1	0.696429	0.928571	1	0.78125	0.958042	0.692308	0.878963	0.839506
8010	1	0.642857	0.857143	1	0.8125	0.972028	0.846154	0.884726	0.848354
8020	1	0.660714	1	0.9375	0.8125	0.958042	0.769231	0.881844	0.84367
8030	1	0.678571	0.928571	0.9375	0.796875	0.965035	0.769231	0.881844	0.843693
8040	1	0.607143	0.928571	1	0.8125	0.972028	0.769231	0.878963	0.841263
8050	1	0.642857	1	1	0.78125	0.958042	0.769231	0.876081	0.83683
8060	1	0.678571	0.928571	0.9375	0.828125	0.944056	0.769231	0.878963	0.838795
8070	1	0.642857	0.928571	0.9375	0.78125	0.965035	0.769231	0.873199	0.833042
8080	1	0.660714	0.928571	0.9375	0.796875	0.965035	0.769231	0.878963	0.839872
8090	1	0.678571	0.928571	1	0.8125	0.972028	0.769231	0.89049	0.855823
8100	1	0.642857	0.928571	0.9375	0.796875	0.93007	0.769231	0.861671	0.815412
8110	1	0.642857	0.928571	1	0.84375	0.965035	0.769231	0.887608	0.851749
8120	1	0.678571	0.928571	0.9375	0.78125	0.944056	0.846154	0.873199	0.831415
8130	1	0.642857	0.928571	1	0.796875	0.958042	0.846154	0.878963	0.840255
8140	1	0.678571	0.928571	1	0.8125	0.951049	0.846154	0.884726	0.847174
8150	1	0.696429	0.928571	1	0.796875	0.965035	0.923077	0.893372	0.859428
8160	1	0.589286	0.928571	1	0.8125	0.951049	0.769231	0.867435	0.824701
8170	1	0.660714	1	1	0.8125	0.965035	0.692308	0.884726	0.848203
8180	1	0.625	1	1	0.78125	0.958042	0.692308	0.870317	0.828763
8190	1	0.660714	0.928571	1	0.8125	0.951049	0.692308	0.876081	0.83546
8200	1	0.678571	0.857143	0.9375	0.796875	0.951049	0.769231	0.873199	0.831246
8210	1	0.607143	0.928571	1	0.8125	0.951049	0.769231	0.870317	0.828341
8220	1	0.642857	0.857143	1	0.8125	0.958042	0.692308	0.873199	0.831921
8230	1	0.678571	0.857143	0.875	0.78125	0.965035	0.769231	0.873199	0.831806
8240	1	0.678571	0.857143	0.9375	0.78125	0.944056	0.769231	0.867435	0.823511
8250	1	0.696429	0.928571	1	0.8125	0.944056	0.769231	0.881844	0.842828
8260	1	0.660714	1	1	0.796875	0.958042	0.692308	0.878963	0.840054
8270	1	0.696429	0.928571	1	0.8125	0.944056	0.769231	0.881844	0.842939
8280	1	0.607143	0.928571	0.9375	0.796875	0.93007	0.769231	0.855908	0.807901
8290	1	0.678571	0.928571	1	0.78125	0.965035	0.769231	0.881844	0.844182
8300	1	0.625	0.928571	0.9375	0.796875	0.951049	0.692308	0.864553	0.82012
8310	1	0.607143	0.857143	0.9375	0.828125	0.972028	0.769231	0.876081	0.836693
8320	1	0.660714	0.928571	1	0.8125	0.958042	0.769231	0.881844	0.843547
8330	1	0.642857	0.928571	1	0.8125	0.958042	0.692308	0.876081	0.835947
8340	1	0.678571	0.928571	1	0.828125	0.944056	0.615385	0.876081	0.834812
8350	1	0.642857	0.928571	0.9375	0.78125	0.965035	0.769231	0.873199	0.833042
8360	1	0.678571	0.928571	0.9375	0.8125	0.937063	0.769231	0.873199	0.830735
8370	1	0.625	1	0.875	0.796875	0.958042	0.769231	0.870317	0.828705
8380	1	0.660714	0.928571	1	0.78125	0.965035	0.846154	0.881844	0.844256
8390	1	0.678571	0.928571	1	0.828125	0.93007	0.769231	0.876081	0.834529
8400	1	0.642857	0.857143	1	0.796875	0.958042	0.769231	0.873199	0.832128
8410	1	0.678571	0.928571	0.8125	0.828125	0.965035	0.769231	0.881844	0.843203
8420	1	0.660714	0.928571	0.9375	0.765625	0.958042	0.769231	0.870317	0.828734
8430	1	0.642857	0.928571	1	0.8125	0.951049	0.769231	0.876081	0.835866
8440	1	0.642857	0.928571	1	0.78125	0.972028	0.846154	0.881844	0.845093
8450	1	0.696429	0.928571	1	0.796875	0.958042	0.769231	0.884726	0.847382
8460	1	0.642857	0.857143	0.9375	0.828125	0.965035	0.692308	0.876081	0.835742
8470	1	0.696429	0.928571	1	0.78125	0.972028	0.769231	0.887608	0.851904
8480	1	0.696429	0.928571	1	0.859375	0.958042	0.846154	0.899135	0.866265
8490	1	0.678571	0.928571	1	0.796875	0.958042	0.846154	0.884726	0.847579
8500	1	0.696429	0.714286	0.9375	0.796875	0.972028	0.769231	0.878963	0.839496
8510	1	0.678571	0.928571	1	0.828125	0.958042	0.846154	0.89049	0.854871
8520	1	0.678571	0.928571	0.875	0.828125	0.951049	0.769231	0.878963	0.838945
8530	1	0.660714	0.928571	0.9375	0.78125	0.937063	0.769231	0.864553	0.819757
8540	1	0.660714	0.928571	0.9375	0.796875	0.979021	0.769231	0.884726	0.848688
8550	1	0.625	0.928571	1	0.78125	0.951049	0.769231	0.867435	0.824747
8560	1	0.660714	0.928571	1	0.8125	0.958042	0.769231	0.881844	0.843547
8570	1	0.660714	0.928571	1	0.796875	0.951049	0.769231	0.876081	0.835636
8580	1	0.642857	0.857143	1	0.78125	0.951049	0.769231	0.867435	0.82424
8590	1	0.642857	1	1	0.8125	0.958042	0.769231	0.881844	0.844131
8600	1	0.714286	1	0.9375	0.8125	0.965035	0.769231	0.893372	0.859208
8610	1	0.696429	0.857143	0.9375	0.8125	0.965035	0.769231	0.884726	0.847106
8620	1	0.678571	0.928571	1	0.8125	0.937063	0.923077	0.881844	0.842813
8630	1	0.696429	1	1	0.796875	0.972028	0.846154	0.896254	0.863868
8640	1	0.660714	1	1	0.796875	0.972028	0.923077	0.893372	0.860514
8650	1	0.678571	0.928571	1	0.796875	0.972028	0.769231	0.887608	0.85202
8660	1	0.678571	0.928571	0.875	0.796875	0.965035	0.692308	0.876081	0.835915
8670	1	0.696429	0.857143	0.9375	0.8125	0.958042	0.846154	0.884726	0.846997
8680	1	0.660714	0.928571	1	0.78125	0.958042	0.769231	0.876081	0.836254
8690	1	0.660714	1	0.9375	0.78125	0.958042	0.769231	0.876081	0.836611
8700	1	0.625	0.928571	1	0.796875	0.958042	0.769231	0.873199	0.832704
8710	1	0.696429	0.785714	0.9375	0.796875	0.965035	0.769231	0.878963	0.839016
8720	1	0.660714	0.928571	0.875	0.796875	0.979021	0.769231	0.881844	0.844838
8730	1	0.660714	0.928571	0.9375	0.796875	0.951049	0.769231	0.873199	0.831719
8740	1	0.714286	0.857143	0.9375	0.78125	0.944056	0.769231	0.873199	0.831023
8750	1	0.642857	0.928571	0.9375	0.8125	0.951049	0.769231	0.873199	0.831849
8760	1	0.696429	0.928571	1	0.8125	0.958042	0.769231	0.887608	0.850917
8770	1	0.660714	0.928571	1	0.796875	0.965035	0.692308	0.878963	0.840379
8780	1	0.642857	0.928571	1	0.8125	0.951049	0.769231	0.876081	0.835702
8790	1	0.571429	0.857143	1	0.828125	0.951049	0.769231	0.864553	0.820763
8800	1	0.678571	0.928571	1	0.8125	0.958042	0.846154	0.887608	0.851231
8810	1	0.696429	0.857143	1	0.828125	0.986014	0.846154	0.902017	0.871345
8820	1	0.678571	0.928571	0.9375	0.859375	0.972028	0.769231	0.896254	0.863123
8830	1	0.696429	1	1	0.765625	0.93007	0.769231	0.870317	0.827306
8840	1	0.660714	0.928571	0.9375	0.796875	0.951049	0.769231	0.873199	0.831936
8850	1	0.625	0.785714	0.9375	0.765625	0.944056	0.769231	0.853026	0.804445
8860	1	0.678571	0.928571	1	0.796875	0.944056	0.769231	0.876081	0.835171
8870	1	0.607143	0.928571	1	0.796875	0.958042	0.692308	0.867435	0.824856
8880	1	0.696429	0.928571	0.9375	0.796875	0.958042	0.769231	0.881844	0.843301
8890	1	0.660714	0.785714	1	0.796875	0.944056	0.846154	0.870317	0.827333
8900	1	0.642857	0.928571	1	0.796875	0.958042	0.769231	0.876081	0.836078
8910	1	0.642857	1	1	0.796875	0.951049	0.692308	0.873199	0.832108
8920	1	0.678571	0.928571	0.9375	0.765625	0.944056	0.769231	0.867435	0.823724
8930	1	0.678571	1	0.875	0.8125	0.958042	0.769231	0.881844	0.843815
8940	1	0.696429	0.928571	1	0.8125	0.951049	0.769231	0.884726	0.846982
8950	1	0.625	1	0.9375	0.796875	0.965035	0.846154	0.878963	0.840882
8960	1	0.642857	0.928571	0.9375	0.796875	0.958042	0.846154	0.876081	0.83613
8970	1	0.696429	0.928571	0.9375	0.796875	0.951049	0.769231	0.878963	0.839117
8980	1	0.696429	1	1	0.796875	0.937063	0.769231	0.878963	0.839081
8990	1	0.696429	0.928571	0.9375	0.796875	0.965035	0.769231	0.884726	0.847522
9000	1	0.660714	1	1	0.8125	0.958042	0.692308	0.881844	0.843709
9010	1	0.660714	0.928571	1	0.8125	0.958042	0.846154	0.884726	0.847615
9020	1	0.625	0.928571	1	0.796875	0.965035	0.769231	0.876081	0.836683
9030	1	0.678571	0.928571	0.9375	0.78125	0.951049	0.769231	0.873199	0.831719
9040	1	0.678571	0.928571	1	0.8125	0.951049	0.769231	0.881844	0.843291
9050	1	0.714286	0.928571	1	0.765625	0.951049	0.692308	0.876081	0.835649
9060	1	0.625	0.857143	0.9375	0.828125	0.951049	0.692308	0.867435	0.823748
9070	1	0.678571	0.928571	1	0.765625	0.944056	0.846154	0.873199	0.831786
9080	1	0.660714	0.857143	0.9375	0.8125	0.958042	0.769231	0.876081	0.835408
9090	1	0.660714	0.928571	1	0.796875	0.958042	0.692308	0.876081	0.835717
9100	1	0.660714	0.928571	1	0.84375	0.958042	0.692308	0.884726	0.84712
9110	1	0.642857	1	0.875	0.84375	0.951049	0.769231	0.878963	0.839595
9120	1	0.696429	0.928571	0.9375	0.78125	0.965035	0.769231	0.881844	0.843784
9130	1	0.660714	0.928571	0.9375	0.796875	0.965035	0.846154	0.881844	0.844393
9140	1	0.696429	0.928571	1	0.796875	0.958042	0.846154	0.887608	0.851134
9150	1	0.642857	0.928571	1	0.8125	0.951049	0.769231	0.876081	0.835702
9160	1	0.642857	0.928571	1	0.828125	0.937063	0.769231	0.873199	0.831288
9170	1	0.678571	0.857143	0.875	0.796875	0.958042	0.769231	0.873199	0.831781
9180	1	0.642857	1	0.9375	0.78125	0.958042	0.769231	0.873199	0.832557
9190	1	0.607143	0.857143	1	0.796875	0.958042	0.769231	0.867435	0.824563
9200	1	0.642857	0.928571	0.875	0.765625	0.965035	0.769231	0.867435	0.825154
9210	1	0.696429	0.928571	0.9375	0.8125	0.951049	0.692308	0.878963	0.838851
9220	1	0.660714	0.928571	0.8125	0.796875	0.951049	0.846154	0.870317	0.827761
9230	1	0.678571	0.857143	0.9375	0.8125	0.958042	0.769231	0.878963	0.839497
9240	1	0.625	0.928571	0.9375	0.796875	0.958042	0.846154	0.873199	0.832713
9250	1	0.696429	0.857143	1	0.796875	0.944056	0.692308	0.873199	0.831118
9260	1	0.642857	0.928571	1	0.78125	0.944056	0.769231	0.867435	0.823756
9270	1	0.678571	0.857143	1	0.828125	0.944056	0.769231	0.878963	0.838638
9280	1	0.642857	0.928571	0.9375	0.828125	0.944056	0.692308	0.870317	0.827431
9290	1	0.660714	0.928571	1	0.8125	0.965035	0.692308	0.881844	0.844051
9300	1	0.625	1	1	0.8125	0.944056	0.692308	0.870317	0.827994
9310	1	0.678571	0.928571	1	0.8125	0.958042	0.769231	0.884726	0.847454
9320	1	0.642857	0.928571	1	0.78125	0.965035	0.769231	0.876081	0.836962
9330	1	0.660714	0.928571	1	0.8125	0.944056	0.692308	0.873199	0.831157
9340	1	0.660714	0.857143	1	0.796875	0.965035	0.846154	0.881844	0.843992
9350	0.97561	0.678571	0.928571	1	0.8125	0.958042	0.846154	0.884726	0.84732
9360	1	0.625	0.857143	1	0.828125	0.937063	0.769231	0.867435	0.823309
9370	1	0.660714	0.857143	1	0.8125	0.951049	0.846154	0.878963	0.839381
9380	1	0.660714	0.857143	1	0.78125	0.965035	0.769231	0.876081	0.836385
9390	1	0.678571	0.857143	0.9375	0.78125	0.972028	0.769231	0.878963	0.840401
9400	1	0.660714	0.928571	1	0.78125	0.951049	0.769231	0.873199	0.831941
9410	1	0.607143	1	0.9375	0.78125	0.937063	0.769231	0.85879	0.812745
9420	1	0.678571	0.857143	1	0.828125	0.972028	0.769231	0.89049	0.855503
9430	1	0.678571	1	0.875	0.796875	0.951049	0.769231	0.876081	0.835314
9440	1	0.625	0.928571	0.9375	0.8125	0.944056	0.769231	0.867435	0.823794
9450	1	0.642857	0.785714	0.9375	0.8125	0.951049	0.846154	0.870317	0.827576
9460	1	0.678571	1	1	0.8125	0.944056	0.846154	0.884726	0.847092
9470	1	0.678571	0.928571	1	0.78125	0.937063	0.769231	0.870317	0.827281
9480	1	0.660714	0.928571	0.9375	0.8125	0.951049	0.769231	0.876081	0.835481
9490	1	0.678571	0.857143	0.9375	0.8125	0.965035	0.769231	0.881844	0.843453
9500	1	0.642857	0.928571	0.9375	0.796875	0.958042	0.846154	0.876081	0.836103
9510	1	0.678571	0.857143	1	0.796875	0.979021	0.769231	0.887608	0.852339
9520	1	0.642857	0.928571	1	0.796875	0.979021	0.846154	0.887608	0.85288
9530	1	0.642857	0.928571	0.9375	0.8125	0.951049	0.769231	0.873199	0.831877
9540	1	0.678571	0.857143	0.9375	0.8125	0.965035	0.769231	0.881844	0.843195
9550	1	0.696429	0.928571	1	0.8125	0.972028	0.692308	0.89049	0.855411
9560	1	0.642857	0.928571	1	0.8125	0.951049	0.769231	0.876081	0.835866
9570	1	0.660714	0.857143	0.875	0.796875	0.972028	0.769231	0.876081	0.836414
9580	1	0.660714	0.928571	0.9375	0.78125	0.965035	0.769231	0.876081	0.836519
9590	1	0.660714	1	1	0.8125	0.972028	0.769231	0.89049	0.856342
9600	1	0.660714	0.928571	1	0.8125	0.965035	0.769231	0.884726	0.847816
9610	1	0.625	0.928571	0.9375	0.78125	0.965035	0.692308	0.867435	0.825131
9620	1	0.660714	0.785714	0.9375	0.796875	0.944056	0.769231	0.864553	0.819253
9630	1	0.660714	0.857143	0.9375	0.828125	0.951049	0.846154	0.878963	0.839228
9640	1	0.660714	0.928571	0.9375	0.8125	0.965035	0.769231	0.881844	0.843899
9650	1	0.625	0.857143	1	0.78125	0.958042	0.846154	0.870317	0.828806
9660	1	0.607143	0.928571	0.9375	0.796875	0.951049	0.769231	0.864553	0.820836
9670	1	0.696429	0.928571	1	0.78125	0.972028	0.692308	0.884726	0.848274
9680	1	0.642857	0.857143	1	0.8125	0.958042	0.769231	0.876081	0.835733
9690	1	0.696429	0.928571	1	0.828125	0.965035	0.846154	0.896254	0.862961
9700	1	0.625	0.928571	0.9375	0.8125	0.965035	0.769231	0.876081	0.836848
9710	1	0.589286	0.857143	0.9375	0.78125	0.965035	0.769231	0.861671	0.817879
9720	1	0.642857	0.857143	0.875	0.8125	0.951049	0.846154	0.870317	0.827257
9730	1	0.625	0.785714	1	0.796875	0.951049	0.615385	0.85879	0.812202
9740	1	0.642857	0.928571	1	0.796875	0.972028	0.769231	0.881844	0.84493
9750	1	0.678571	0.928571	0.9375	0.796875	0.972028	0.769231	0.884726	0.84777
9760	1	0.642857	0.928571	0.875	0.796875	0.923077	0.769231	0.855908	0.807361
9770	1	0.625	0.857143	1	0.78125	0.951049	0.769231	0.864553	0.820261
9780	1	0.660714	0.928571	1	0.828125	0.951049	0.846154	0.884726	0.847031
9790	1	0.660714	0.928571	0.9375	0.796875	0.958042	0.769231	0.876081	0.835635
9800	1	0.625	1	1	0.8125	0.972028	0.769231	0.884726	0.848938
9810	1	0.678571	0.857143	1	0.8125	0.951049	0.769231	0.878963	0.839195
9820	1	0.678571	0.857143	0.875	0.796875	0.965035	0.769231	0.876081	0.83551
9830	1	0.625	0.928571	1	0.78125	0.972028	0.846154	0.878963	0.841234
9840	1	0.625	0.857143	0.875	0.8125	0.965035	0.769231	0.870317	0.828339
9850	1	0.625	0.928571	0.875	0.78125	0.965035	0.846154	0.870317	0.828895
9860	1	0.642857	0.928571	1	0.8125	0.958042	0.846154	0.881844	0.843977
9870	1	0.660714	1	1	0.75	0.972028	0.846154	0.881844	0.845396
9880	1	0.714286	0.928571	0.9375	0.796875	0.958042	0.846154	0.887608	0.850895
9890	1	0.642857	0.928571	1	0.796875	0.972028	0.769231	0.881844	0.844891
9900	1	0.660714	0.857143	0.9375	0.78125	0.93007	0.692308	0.855908	0.80754
9910	1	0.589286	0.928571	1	0.78125	0.944056	0.769231	0.85879	0.812811
9920	1	0.660714	0.928571	0.9375	0.796875	0.951049	0.769231	0.873199	0.831433
9930	1	0.642857	0.857143	0.9375	0.796875	0.965035	0.923077	0.878963	0.840415
9940	1	0.625	0.928571	0.9375	0.8125	0.972028	0.769231	0.878963	0.840834
9950	1	0.642857	0.928571	0.9375	0.84375	0.958042	0.769231	0.881844	0.843547
9960	1	0.678571	0.857143	1	0.796875	0.958042	0.846154	0.881844	0.843663
9970	1	0.571429	0.857143	1	0.796875	0.958042	0.769231	0.861671	0.817704
9980	1	0.589286	0.857143	0.9375	0.828125	0.979021	0.769231	0.876081	0.836791
9990	1	0.625	0.928571	1	0.796875	0.965035	0.846154	0.878963	0.840816
10000	1	0.678571	0.928571	0.9375	0.8125	0.965035	0.769231	0.884726	0.847948
10010	1	0.625	0.857143	0.9375	0.796875	0.944056	0.846154	0.864553	0.819814
10020	1	0.607143	0.928571	1	0.8125	0.958042	0.769231	0.873199	0.832857
10030	1	0.625	0.857143	1	0.8125	0.951049	0.769231	0.870317	0.827828
10040	1	0.660714	0.928571	1	0.8125	0.972028	0.769231	0.887608	0.852218
10050	1	0.642857	1	0.9375	0.78125	0.958042	0.769231	0.873199	0.83266
10060	1	0.678571	0.857143	1	0.796875	0.965035	0.846154	0.884726	0.847826
10070	1	0.696429	0.928571	0.9375	0.828125	0.972028	0.769231	0.893372	0.859458
10080	1	0.607143	0.857143	1	0.796875	0.972028	0.846154	0.876081	0.837207
10090	1	0.678571	0.857143	0.9375	0.796875	0.958042	0.769231	0.876081	0.835911
10100	1	0.732143	0.857143	0.9375	0.8125	0.965035	0.846154	0.893372	0.858612
10110	1	0.642857	0.857143	1	0.796875	0.965035	0.769231	0.876081	0.836304
10120	1	0.660714	0.928571	0.875	0.796875	0.951049	0.769231	0.870317	0.827711
10130	1	0.660714	0.928571	0.9375	0.765625	0.951049	0.846154	0.870317	0.828184
10140	1	0.678571	0.928571	1	0.796875	0.958042	0.692308	0.878963	0.839633
10150	1	0.678571	0.714286	0.9375	0.8125	0.965035	0.692308	0.873199	0.831154
10160	1	0.642857	0.928571	0.8125	0.78125	0.965035	0.692308	0.864553	0.820895
10170	1	0.642857	0.785714	0.9375	0.765625	0.965035	0.692308	0.861671	0.817023
10180	1	0.660714	0.857143	0.875	0.796875	0.951049	0.769231	0.867435	0.82364
10190	1	0.714286	0.928571	1	0.796875	0.944056	0.846154	0.884726	0.846766
10200	0.97561	0.642857	0.928571	1	0.796875	0.937063	0.769231	0.864553	0.819705
10210	1	0.678571	0.928571	0.9375	0.796875	0.965035	0.692308	0.878963	0.839433
10220	1	0.607143	0.928571	0.9375	0.796875	0.958042	0.692308	0.864553	0.821072
10230	1	0.642857	0.857143	1	0.78125	0.951049	0.769231	0.867435	0.824007
10240	1	0.660714	0.857143	0.9375	0.828125	0.944056	0.769231	0.873199	0.83086
10250	1	0.660714	1	0.875	0.796875	0.937063	0.769231	0.867435	0.823533
10260	1	0.678571	0.928571	0.9375	0.796875	0.951049	0.769231	0.876081	0.835609
10270	1	0.714286	0.928571	1	0.84375	0.965035	0.692308	0.896254	0.862482
10280	1	0.642857	0.928571	1	0.78125	0.951049	0.769231	0.870317	0.828433
10290	1	0.642857	0.928571	1	0.8125	0.965035	0.692308	0.878963	0.840137
10300	1	0.660714	0.857143	1	0.796875	0.937063	0.692308	0.864553	0.819662
10310	1	0.625	0.857143	1	0.796875	0.958042	0.846154	0.873199	0.832435
10320	1	0.660714	0.857143	0.9375	0.78125	0.958042	0.769231	0.870317	0.828251
10330	1	0.660714	0.928571	0.9375	0.796875	0.951049	0.692308	0.870317	0.8276
10340	1	0.607143	0.928571	0.9375	0.8125	0.951049	0.769231	0.867435	0.824465
10350	1	0.660714	0.928571	1	0.8125	0.972028	0.692308	0.884726	0.848332
10360	1	0.625	0.928571	0.9375	0.8125	0.944056	0.769231	0.867435	0.823965
10370	1	0.660714	0.928571	1	0.796875	0.972028	0.769231	0.884726	0.848473
10380	1	0.642857	0.928571	0.8125	0.78125	0.944056	0.692308	0.855908	0.808177
10390	1	0.678571	0.928571	0.9375	0.78125	0.958042	0.769231	0.876081	0.835867
10400	1	0.714286	1	0.9375	0.78125	0.958042	0.769231	0.884726	0.847697
10410	1	0.607143	1	0.9375	0.78125	0.951049	0.769231	0.864553	0.820772
10420	1	0.660714	0.928571	0.875	0.796875	0.958042	0.769231	0.873199	0.831781
10430	1	0.660714	0.928571	0.9375	0.765625	0.951049	0.769231	0.867435	0.824546
10440	1	0.642857	0.928571	1	0.796875	0.951049	0.846154	0.876081	0.835995
10450	1	0.642857	0.857143	0.9375	0.78125	0.965035	0.692308	0.867435	0.82481
10460	1	0.696429	0.928571	0.875	0.765625	0.965035	0.769231	0.876081	0.836207
10470	1	0.625	0.857143	0.9375	0.8125	0.951049	0.769231	0.867435	0.823986
10480	1	0.642857	0.857143	0.9375	0.796875	0.944056	0.846154	0.867435	0.82383
10490	1	0.660714	1	0.9375	0.8125	0.958042	0.769231	0.881844	0.84355
10500	1	0.660714	0.928571	0.9375	0.8125	0.958042	0.769231	0.878963	0.839645
10510	1	0.642857	0.857143	0.9375	0.8125	0.972028	0.692308	0.876081	0.83665
10520	1	0.696429	0.857143	1	0.796875	0.965035	0.846154	0.887608	0.851362
10530	1	0.678571	0.785714	1	0.828125	0.972028	0.769231	0.887608	0.851389
10540	1	0.642857	0.928571	0.875	0.796875	0.972028	0.769231	0.876081	0.836425
10550	1	0.625	0.928571	0.9375	0.78125	0.951049	0.769231	0.864553	0.820321
10560	1	0.678571	0.928571	0.9375	0.8125	0.93007	0.769231	0.870317	0.826793
10570	1	0.678571	1	1	0.796875	0.972028	0.846154	0.893372	0.860135
10580	1	0.678571	0.928571	1	0.78125	0.958042	0.769231	0.878963	0.839807
10590	1	0.696429	0.928571	0.8125	0.765625	0.951049	0.769231	0.867435	0.823796
10600	1	0.642857	1	1	0.796875	0.951049	0.692308	0.873199	0.832104
10610	1	0.678571	0.857143	1	0.796875	0.937063	0.769231	0.870317	0.827129
10620	1	0.660714	0.857143	0.875	0.8125	0.944056	0.692308	0.864553	0.819575
10630	1	0.607143	0.857143	1	0.796875	0.951049	0.769231	0.864553	0.82037
10640	1	0.607143	1	1	0.8125	0.958042	0.769231	0.876081	0.836669
10650	1	0.642857	1	0.9375	0.78125	0.944056	0.769231	0.867435	0.824404
10660	1	0.678571	1	0.9375	0.78125	0.944056	0.692308	0.870317	0.827371
10670	1	0.678571	0.928571	0.9375	0.828125	0.958042	0.769231	0.884726	0.847157
10680	1	0.696429	0.857143	0.875	0.828125	0.979021	0.846154	0.893372	0.859508
10690	1	0.642857	0.928571	1	0.796875	0.972028	0.769231	0.881844	0.844591
10700	1	0.625	0.857143	0.9375	0.796875	0.958042	0.769231	0.867435	0.824054
10710	1	0.625	1	0.9375	0.8125	0.965035	0.769231	0.878963	0.840903
10720	1	0.678571	0.928571	1	0.796875	0.944056	0.846154	0.878963	0.839069
10730	1	0.589286	0.928571	0.9375	0.796875	0.944056	0.846154	0.861671	0.816591
10740	1	0.678571	0.928571	1	0.796875	0.937063	0.692308	0.870317	0.827011
10750	1	0.625	0.785714	1	0.796875	0.937063	0.692308	0.855908	0.808
10760	1	0.625	0.928571	1	0.78125	0.965035	0.923077	0.878963	0.84115
10770	1	0.607143	0.928571	1	0.78125	0.951049	0.846154	0.867435	0.824729
10780	1	0.625	0.857143	1	0.8125	0.958042	0.769231	0.873199	0.83224
10790	1	0.678571	0.857143	0.8125	0.796875	0.965035	0.769231	0.873199	0.83201
10800	1	0.660714	0.857143	0.875	0.8125	0.944056	0.692308	0.864553	0.819264
10810	1	0.660714	0.785714	1	0.8125	0.958042	0.692308	0.873199	0.831617
10820	1	0.607143	0.928571	0.9375	0.78125	0.965035	0.769231	0.867435	0.825405
10830	1	0.660714	0.928571	0.875	0.796875	0.958042	0.692308	0.870317	0.828352
10840	1	0.660714	0.928571	0.9375	0.765625	0.951049	0.692308	0.864553	0.820343
10850	1	0.642857	0.928571	1	0.796875	0.944056	0.769231	0.870317	0.827696
10860	1	0.678571	0.928571	0.9375	0.8125	0.958042	0.846154	0.884726	0.847025
10870	1	0.660714	0.928571	0.9375	0.78125	0.951049	0.769231	0.870317	0.827757
10880	1	0.660714	0.857143	0.875	0.78125	0.965035	0.769231	0.870317	0.828377
10890	1	0.642857	0.928571	1	0.796875	0.951049	0.846154	0.876081	0.836011
10900	1	0.696429	0.785714	0.875	0.78125	0.958042	0.769231	0.870317	0.827494
10910	1	0.642857	0.857143	0.8125	0.8125	0.944056	0.692308	0.85879	0.811364
10920	1	0.678571	0.928571	1	0.796875	0.951049	0.846154	0.881844	0.843453
10930	1	0.625	0.857143	1	0.8125	0.979021	0.615385	0.876081	0.836736
10940	1	0.660714	0.928571	1	0.796875	0.937063	0.692308	0.867435	0.823297
10950	1	0.678571	0.928571	0.875	0.78125	0.944056	0.692308	0.864553	0.819224
10960	1	0.642857	1	1	0.796875	0.965035	0.846154	0.884726	0.84873
10970	1	0.660714	0.928571	1	0.78125	0.972028	0.692308	0.878963	0.840851
10980	1	0.660714	0.857143	1	0.78125	0.951049	0.769231	0.870317	0.827905
10990	1	0.660714	0.857143	0.9375	0.828125	0.958042	0.615385	0.873199	0.831608
11000	1	0.589286	0.857143	0.875	0.78125	0.958042	0.846154	0.85879	0.813016
11010	1	0.589286	0.857143	0.9375	0.796875	0.958042	0.769231	0.861671	0.816994
11020	1	0.678571	0.928571	1	0.8125	0.972028	0.769231	0.89049	0.85561
11030	1	0.589286	0.928571	0.9375	0.8125	0.965035	0.846154	0.873199	0.833119
11040	1	0.660714	0.857143	1	0.796875	0.965035	0.769231	0.878963	0.840285
11050	1	0.660714	0.857143	0.9375	0.796875	0.979021	0.769231	0.881844	0.844667
11060	1	0.625	0.928571	0.9375	0.796875	0.937063	0.615385	0.855908	0.807635
11070	1	0.678571	1	1	0.8125	0.951049	0.692308	0.881844	0.843473
11080	1	0.696429	0.857143	1	0.8125	0.958042	0.769231	0.884726	0.846736
11090	1	0.607143	0.928571	0.9375	0.78125	0.944056	0.769231	0.85879	0.812575
11100	1	0.625	0.928571	0.9375	0.78125	0.951049	0.846154	0.867435	0.82432
11110	1	0.642857	1	0.8125	0.796875	0.965035	0.846154	0.876081	0.837041
11120	1	0.625	0.857143	0.9375	0.796875	0.965035	0.846154	0.873199	0.833121
11130	1	0.625	0.928571	1	0.796875	0.958042	0.692308	0.870317	0.828468
11140	1	0.642857	0.928571	0.875	0.8125	0.951049	0.692308	0.867435	0.824287
11150	1	0.642857	0.857143	0.8125	0.8125	0.965035	0.692308	0.867435	0.82406
11160	1	0.642857	0.857143	0.9375	0.796875	0.965035	0.769231	0.873199	0.832358
11170	1	0.678571	0.928571	1	0.796875	0.944056	0.615385	0.870317	0.82735
11180	1	0.678571	0.928571	1	0.796875	0.951049	0.769231	0.878963	0.839398
11190	1	0.642857	0.857143	0.9375	0.8125	0.965035	0.769231	0.876081	0.836156
11200	1	0.642857	0.928571	0.9375	0.828125	0.951049	0.692308	0.873199	0.831754
11210	1	0.571429	0.928571	1	0.765625	0.937063	0.692308	0.847262	0.797507
11220	1	0.642857	0.857143	0.9375	0.796875	0.958042	0.615385	0.864553	0.820168
11230	1	0.642857	0.857143	1	0.8125	0.958042	0.846154	0.878963	0.839846
11240	1	0.660714	0.857143	0.9375	0.8125	0.965035	0.615385	0.873199	0.831605
11250	1	0.696429	0.857143	1	0.796875	0.951049	0.615385	0.873199	0.831177
11260	1	0.642857	1	0.9375	0.796875	0.958042	0.692308	0.873199	0.83226
11270	1	0.642857	0.785714	0.875	0.78125	0.944056	0.769231	0.855908	0.808256
11280	1	0.642857	0.857143	0.9375	0.796875	0.958042	0.846154	0.873199	0.831935
11290	1	0.678571	0.785714	0.9375	0.796875	0.958042	0.615385	0.867435	0.823433
11300	1	0.625	0.857143	1	0.78125	0.965035	0.692308	0.867435	0.824822
11310	1	0.660714	0.857143	0.9375	0.8125	0.958042	0.846154	0.878963	0.839491
11320	1	0.642857	0.785714	1	0.8125	0.951049	0.769231	0.870317	0.827789
11330	1	0.678571	0.928571	0.9375	0.8125	0.951049	0.769231	0.878963	0.839142
11340	1	0.660714	0.928571	0.9375	0.796875	0.965035	0.769231	0.878963	0.84017
11350	1	0.678571	0.857143	0.9375	0.796875	0.937063	0.692308	0.864553	0.819209
11360	1	0.660714	0.857143	0.9375	0.78125	0.958042	0.692308	0.867435	0.824091
11370	1	0.607143	0.857143	0.9375	0.8125	0.958042	0.769231	0.867435	0.824651
11380	1	0.678571	0.857143	0.9375	0.8125	0.958042	0.769231	0.878963	0.839389
11390	1	0.642857	0.857143	1	0.796875	0.958042	0.846154	0.876081	0.836194
11400	1	0.571429	0.714286	1	0.8125	0.965035	0.692308	0.85879	0.813419
11410	1	0.607143	0.928571	0.8125	0.828125	0.972028	0.769231	0.873199	0.832956
11420	1	0.678571	0.857143	0.9375	0.828125	0.965035	0.769231	0.884726	0.847308
11430	1	0.660714	0.857143	1	0.796875	0.958042	0.692308	0.873199	0.83216
11440	1	0.660714	0.928571	0.8125	0.796875	0.944056	0.692308	0.861671	0.815266
11450	1	0.642857	0.785714	0.875	0.8125	0.986014	0.692308	0.876081	0.837055
11460	1	0.607143	1	1	0.8125	0.972028	0.769231	0.881844	0.845543
11470	1	0.678571	0.928571	1	0.796875	0.958042	0.692308	0.878963	0.83938
11480	1	0.678571	0.928571	0.9375	0.828125	0.944056	0.769231	0.878963	0.838861
11490	1	0.589286	0.928571	0.9375	0.796875	0.972028	0.846154	0.873199	0.833801
11500	1	0.642857	0.785714	0.9375	0.796875	0.965035	0.692308	0.867435	0.824184
11510	1	0.678571	0.928571	1	0.8125	0.951049	0.769231	0.881844	0.843058
11520	1	0.625	0.928571	0.9375	0.796875	0.93007	0.769231	0.85879	0.81186
11530	1	0.678571	0.928571	0.8125	0.828125	0.965035	0.846154	0.884726	0.847606
11540	1	0.678571	0.785714	0.9375	0.78125	0.958042	0.769231	0.870317	0.827836
11550	1	0.660714	0.785714	1	0.78125	0.965035	0.769231	0.873199	0.832551
11560	1	0.660714	0.928571	0.9375	0.796875	0.93007	0.692308	0.861671	0.815397
11570	1	0.660714	0.785714	0.875	0.765625	0.958042	0.615385	0.855908	0.808104
11580	1	0.625	0.928571	0.9375	0.8125	0.958042	0.769231	0.873199	0.832064
11590	1	0.642857	0.857143	0.9375	0.796875	0.965035	0.769231	0.873199	0.832801
11600	1	0.625	0.785714	1	0.796875	0.965035	0.846154	0.873199	0.832616
11610	1	0.660714	0.928571	0.875	0.765625	0.979021	0.692308	0.873199	0.833499
11620	1	0.660714	0.928571	0.8125	0.8125	0.958042	0.769231	0.873199	0.831645
11630	1	0.660714	0.928571	0.9375	0.765625	0.972028	0.846154	0.878963	0.841336
11640	1	0.642857	0.928571	0.9375	0.78125	0.958042	0.846154	0.873199	0.832204
11650	1	0.642857	0.928571	0.875	0.796875	0.965035	0.769231	0.873199	0.832259
11660	1	0.607143	1	0.875	0.78125	0.965035	0.692308	0.864553	0.821666
11670	1	0.642857	0.785714	0.875	0.765625	0.958042	0.692308	0.855908	0.808312
11680	1	0.625	0.857143	0.9375	0.796875	0.951049	0.769231	0.864553	0.820178
11690	1	0.642857	0.714286	0.9375	0.78125	0.951049	0.692308	0.855908	0.807834
11700	1	0.642857	0.928571	0.875	0.796875	0.93007	0.769231	0.85879	0.81154
11710	1	0.642857	0.928571	1	0.796875	0.972028	0.769231	0.881844	0.84493
11720	1	0.660714	0.928571	1	0.8125	0.958042	0.769231	0.881844	0.843718
11730	1	0.660714	0.928571	0.8125	0.78125	0.951049	0.692308	0.861671	0.816019
11740	1	0.696429	0.785714	0.875	0.75	0.965035	0.769231	0.867435	0.823899
11750	1	0.642857	0.928571	0.875	0.78125	0.972028	0.846154	0.876081	0.836882
11760	1	0.642857	0.857143	0.9375	0.796875	0.972028	0.769231	0.876081	0.836897
11770	1	0.642857	0.928571	0.9375	0.796875	0.951049	0.769231	0.870317	0.827822
11780	1	0.660714	0.714286	0.9375	0.8125	0.951049	0.769231	0.867435	0.823507
11790	1	0.642857	0.928571	0.9375	0.78125	0.951049	0.846154	0.870317	0.828113
11800	1	0.678571	0.928571	0.875	0.78125	0.958042	0.769231	0.873199	0.831703
11810	1	0.678571	0.857143	1	0.84375	0.965035	0.692308	0.887608	0.850949
11820	1	0.660714	0.785714	0.9375	0.8125	0.965035	0.769231	0.876081	0.835693
11830	1	0.660714	0.857143	0.9375	0.8125	0.958042	0.769231	0.876081	0.835611
11840	1	0.607143	0.785714	0.9375	0.8125	0.965035	0.692308	0.864553	0.820295
11850	1	0.696429	0.785714	1	0.765625	0.951049	0.769231	0.870317	0.827718
11860	1	0.660714	0.785714	0.9375	0.796875	0.958042	0.846154	0.873199	0.831781
11870	1	0.625	0.857143	0.875	0.765625	0.958042	0.692308	0.855908	0.809206
11880	1	0.607143	0.857143	0.8125	0.78125	0.958042	0.846154	0.85879	0.813191
11890	1	0.660714	0.928571	0.9375	0.8125	0.937063	0.769231	0.870317	0.827041
11900	1	0.625	0.857143	1	0.765625	0.937063	0.692308	0.853026	0.804138
11910	1	0.642857	0.857143	0.9375	0.796875	0.944056	0.846154	0.867435	0.823633
11920	1	0.696429	0.928571	0.875	0.796875	0.937063	0.846154	0.873199	0.83083
11930	1	0.642857	0.857143	0.9375	0.78125	0.965035	0.769231	0.870317	0.828032
11940	1	0.696429	1	0.8125	0.796875	0.951049	0.615385	0.870317	0.827545
11950	1	0.678571	0.785714	1	0.796875	0.951049	0.846154	0.876081	0.835271
11960	1	0.625	0.928571	0.875	0.78125	0.958042	0.846154	0.867435	0.825082
11970	1	0.660714	0.928571	0.9375	0.796875	0.951049	0.846154	0.876081	0.835784
11980	1	0.625	0.857143	0.875	0.78125	0.937063	0.846154	0.855908	0.808162
11990	1	0.625	0.785714	0.9375	0.8125	0.958042	0.846154	0.870317	0.82803
12000	1	0.607143	0.857143	1	0.8125	0.965035	0.692308	0.870317	0.828676
12010	1	0.642857	0.857143	0.9375	0.796875	0.958042	0.692308	0.867435	0.824117
12020	1	0.642857	0.785714	0.875	0.796875	0.951049	0.769231	0.861671	0.815867
12030	1	0.553571	0.714286	0.9375	0.78125	0.965035	0.769231	0.850144	0.802177
12040	1	0.642857	0.928571	0.75	0.78125	0.951049	0.846154	0.861671	0.816722
12050	1	0.642857	0.928571	1	0.78125	0.972028	0.769231	0.878963	0.841253
12060	1	0.607143	0.785714	1	0.796875	0.958042	0.692308	0.861671	0.816424
12070	1	0.625	0.857143	0.875	0.8125	0.965035	0.769231	0.870317	0.828271
12080	1	0.660714	0.928571	0.875	0.796875	0.972028	0.615385	0.873199	0.832508
12090	1	0.642857	0.857143	0.9375	0.78125	0.951049	0.846154	0.867435	0.824103
12100	1	0.607143	0.857143	0.9375	0.78125	0.951049	0.769231	0.85879	0.812687
12110	1	0.660714	0.928571	0.875	0.828125	0.93007	0.692308	0.864553	0.818984
12120	1	0.625	0.785714	1	0.796875	0.958042	0.769231	0.867435	0.824371
12130	1	0.660714	0.928571	1	0.796875	0.958042	0.769231	0.878963	0.839881
12140	1	0.678571	0.857143	0.875	0.78125	0.972028	0.615385	0.870317	0.827812
12150	1	0.678571	0.928571	0.9375	0.796875	0.972028	0.769231	0.884726	0.848455
12160	1	0.589286	0.857143	0.9375	0.78125	0.965035	0.846154	0.864553	0.821864
12170	1	0.678571	0.857143	0.9375	0.828125	0.951049	0.692308	0.876081	0.835083
12180	1	0.660714	0.928571	1	0.78125	0.951049	0.769231	0.873199	0.831885
12190	1	0.625	0.928571	0.8125	0.78125	0.965035	0.692308	0.861671	0.817342
12200	1	0.696429	0.857143	0.9375	0.8125	0.972028	0.538462	0.878963	0.83934
12210	1	0.660714	0.857143	0.8125	0.78125	0.951049	0.692308	0.85879	0.812045
12220	1	0.660714	0.928571	0.8125	0.796875	0.979021	0.692308	0.876081	0.836637
12230	1	0.589286	0.928571	0.8125	0.8125	0.965035	0.769231	0.864553	0.821242
12240	1	0.625	0.642857	0.875	0.765625	0.958042	0.769231	0.850144	0.800193
12250	1	0.660714	0.857143	1	0.796875	0.965035	0.769231	0.878963	0.840061
12260	1	0.660714	0.928571	0.9375	0.78125	0.965035	0.769231	0.876081	0.836608
12270	1	0.625	0.714286	0.9375	0.796875	0.972028	0.615385	0.861671	0.816301
12280	1	0.642857	0.857143	1	0.78125	0.965035	0.769231	0.873199	0.83248
12290	1	0.642857	0.928571	0.875	0.765625	0.958042	0.769231	0.864553	0.820576
12300	1	0.589286	0.928571	0.875	0.796875	0.944056	0.692308	0.853026	0.8045
12310	1	0.571429	0.928571	0.875	0.8125	0.951049	0.769231	0.85879	0.813098
12320	1	0.625	1	1	0.78125	0.951049	0.692308	0.867435	0.824784
12330	1	0.714286	0.928571	0.75	0.84375	0.979021	0.615385	0.887608	0.851186
12340	1	0.660714	0.785714	0.9375	0.765625	0.972028	0.769231	0.870317	0.828546
12350	1	0.625	0.928571	1	0.796875	0.951049	0.769231	0.870317	0.82848
12360	1	0.660714	0.785714	0.9375	0.796875	0.965035	0.769231	0.873199	0.832012
12370	1	0.642857	0.857143	1	0.828125	0.951049	0.846154	0.878963	0.839456
12380	1	0.625	0.857143	1	0.78125	0.965035	0.692308	0.867435	0.824938
12390	1	0.625	0.928571	1	0.75	0.965035	0.769231	0.867435	0.826083
12400	1	0.642857	0.928571	0.875	0.796875	0.951049	0.769231	0.867435	0.824115
12410	1	0.660714	0.857143	0.9375	0.78125	0.972028	0.692308	0.873199	0.833368
12420	1	0.625	0.928571	0.875	0.796875	0.958042	0.923077	0.873199	0.83277
12430	1	0.607143	1	0.875	0.78125	0.937063	0.769231	0.855908	0.80842
12440	1	0.642857	0.785714	1	0.796875	0.944056	0.692308	0.861671	0.81577
12450	1	0.642857	0.857143	0.875	0.796875	0.958042	0.769231	0.867435	0.824328
12460	1	0.660714	1	0.875	0.796875	0.944056	0.692308	0.867435	0.823506
12470	1	0.642857	0.857143	0.75	0.796875	0.944056	0.769231	0.855908	0.807795
12480	1	0.607143	1	0.9375	0.765625	0.944056	0.846154	0.861671	0.817264
12490	1	0.625	0.785714	0.875	0.796875	0.958042	0.692308	0.85879	0.811696
12500	1	0.589286	1	1	0.796875	0.951049	0.692308	0.864553	0.821059
12510	1	0.660714	0.928571	1	0.8125	0.958042	0.692308	0.878963	0.839589
12520	1	0.642857	1	0.875	0.78125	0.965035	0.769231	0.873199	0.833093
12530	1	0.678571	1	0.875	0.796875	0.958042	0.692308	0.876081	0.835646
12540	1	0.678571	1	0.875	0.78125	0.951049	0.615385	0.867435	0.823708
12550	1	0.642857	0.714286	0.9375	0.828125	0.958042	0.769231	0.870317	0.82748
12560	1	0.642857	0.928571	1	0.796875	0.965035	0.692308	0.876081	0.836471
12570	1	0.642857	0.785714	0.9375	0.8125	0.951049	0.846154	0.870317	0.827669
12580	1	0.678571	0.857143	0.8125	0.78125	0.965035	0.846154	0.873199	0.832141
12590	1	0.642857	0.785714	0.875	0.8125	0.965035	0.769231	0.870317	0.82825
12600	1	0.642857	0.714286	0.9375	0.796875	0.958042	0.769231	0.864553	0.819792
12610	1	0.660714	0.857143	0.875	0.796875	0.951049	0.692308	0.864553	0.8194
12620	1	0.660714	0.857143	0.8125	0.828125	0.965035	0.692308	0.873199	0.831522
12630	1	0.625	0.857143	0.9375	0.78125	0.944056	0.615385	0.853026	0.804233
12640	1	0.642857	0.928571	0.875	0.796875	0.944056	0.769231	0.864553	0.81968
12650	1	0.678571	1	0.8125	0.765625	0.965035	0.615385	0.867435	0.824837
12660	1	0.642857	0.928571	0.875	0.796875	0.958042	0.846154	0.873199	0.831829
12670	1	0.678571	0.857143	0.875	0.8125	0.951049	0.769231	0.873199	0.831
12680	1	0.678571	0.857143	0.875	0.78125	0.958042	0.769231	0.870317	0.827875
12690	1	0.589286	0.928571	0.875	0.8125	0.958042	0.692308	0.861671	0.816988
12700	1	0.696429	0.928571	0.75	0.796875	0.979021	0.769231	0.881844	0.844303
12710	1	0.642857	0.857143	1	0.78125	0.944056	0.769231	0.864553	0.819901
12720	1	0.678571	0.928571	1	0.78125	0.972028	0.846154	0.887608	0.852293
12730	1	0.642857	0.857143	1	0.796875	0.972028	0.692308	0.876081	0.836505
12740	1	0.607143	0.928571	0.9375	0.796875	0.972028	0.769231	0.873199	0.833765
12750	1	0.642857	0.928571	0.875	0.796875	0.958042	0.692308	0.867435	0.824471
12760	1	0.660714	0.857143	0.875	0.828125	0.951049	0.692308	0.870317	0.827191
12770	1	0.607143	0.857143	0.875	0.78125	0.958042	0.769231	0.85879	0.812763
12780	1	0.607143	0.857143	0.8125	0.78125	0.965035	0.769231	0.85879	0.814101
12790	1	0.642857	0.857143	0.9375	0.78125	0.965035	0.692308	0.867435	0.82463
12800	1	0.607143	0.928571	1	0.796875	0.951049	0.769231	0.867435	0.824812
12810	1	0.625	0.857143	0.9375	0.796875	0.958042	0.769231	0.867435	0.82457
12820	1	0.589286	0.857143	0.875	0.796875	0.965035	0.692308	0.85879	0.813185
12830	1	0.642857	0.928571	0.875	0.765625	0.951049	0.615385	0.855908	0.808683
12840	1	0.642857	0.928571	0.9375	0.78125	0.965035	0.846154	0.876081	0.836761
12850	1	0.660714	0.928571	0.875	0.78125	0.965035	0.769231	0.873199	0.832573
12860	1	0.642857	0.857143	0.8125	0.78125	0.965035	0.769231	0.864553	0.821077
12870	1	0.678571	0.857143	0.8125	0.796875	0.965035	0.538462	0.864553	0.819664
12880	1	0.607143	0.857143	0.9375	0.765625	0.951049	0.769231	0.855908	0.808914
12890	1	0.607143	0.928571	0.9375	0.796875	0.951049	0.692308	0.861671	0.816588
12900	1	0.625	0.714286	0.9375	0.796875	0.951049	0.769231	0.85879	0.811608
12910	1	0.607143	0.928571	0.9375	0.796875	0.951049	0.692308	0.861671	0.816538
12920	1	0.696429	0.857143	0.875	0.8125	0.951049	0.769231	0.876081	0.834945
12930	1	0.660714	0.928571	1	0.796875	0.951049	0.692308	0.873199	0.831679
12940	1	0.678571	0.857143	1	0.78125	0.944056	0.769231	0.870317	0.827321
12950	1	0.678571	0.714286	0.9375	0.828125	0.965035	0.692308	0.876081	0.835347
12960	1	0.660714	0.928571	0.875	0.78125	0.979021	0.615385	0.873199	0.832718
12970	1	0.625	0.857143	1	0.78125	0.944056	0.769231	0.861671	0.816149
12980	1	0.696429	0.928571	0.9375	0.78125	0.951049	0.615385	0.870317	0.82769
12990	1	0.625	0.857143	0.875	0.796875	0.965035	0.692308	0.864553	0.820754
13000	1	0.660714	0.857143	0.875	0.8125	0.965035	0.769231	0.876081	0.835693
13010	1	0.607143	0.928571	0.9375	0.828125	0.937063	0.769231	0.864553	0.819809
13020	0.97561	0.714286	0.857143	1	0.78125	0.951049	0.692308	0.873199	0.831136
13030	1	0.678571	0.785714	0.875	0.796875	0.958042	0.692308	0.867435	0.823641
13040	1	0.660714	0.928571	0.875	0.796875	0.965035	0.769231	0.876081	0.83624
13050	1	0.660714	0.928571	0.875	0.8125	0.951049	0.769231	0.873199	0.831276
13060	1	0.696429	0.928571	1	0.78125	0.972028	0.692308	0.884726	0.847806
13070	1	0.678571	0.857143	0.9375	0.8125	0.944056	0.769231	0.873199	0.831216
13080	1	0.678571	0.857143	0.8125	0.796875	0.951049	0.769231	0.867435	0.823217
13090	1	0.642857	0.928571	0.9375	0.78125	0.965035	0.769231	0.873199	0.832657
13100	1	0.660714	0.857143	0.875	0.765625	0.937063	0.615385	0.850144	0.799655
13110	1	0.660714	0.928571	0.8125	0.765625	0.972028	0.692308	0.867435	0.824982
13120	1	0.660714	0.857143	0.875	0.8125	0.951049	0.615385	0.864553	0.819174
13130	1	0.678571	0.928571	0.9375	0.796875	0.937063	0.846154	0.873199	0.831105
13140	1	0.660714	0.928571	0.8125	0.8125	0.965035	0.769231	0.876081	0.835685
13150	1	0.607143	0.857143	0.875	0.78125	0.951049	0.615385	0.850144	0.800379
13160	1	0.660714	0.785714	0.875	0.796875	0.937063	0.769231	0.85879	0.811319
13170	1	0.642857	0.857143	0.9375	0.78125	0.972028	0.769231	0.873199	0.832903
13180	1	0.678571	0.857143	0.9375	0.828125	0.958042	0.846154	0.884726	0.846663
13190	1	0.642857	0.857143	0.8125	0.75	0.951049	0.769231	0.853026	0.80495
13200	1	0.625	1	0.8125	0.796875	0.965035	0.846154	0.873199	0.8332
13210	1	0.625	0.785714	0.9375	0.796875	0.965035	0.846154	0.870317	0.828872
13220	1	0.607143	0.714286	0.8125	0.796875	0.958042	0.769231	0.853026	0.804554
13230	1	0.625	0.642857	0.875	0.796875	0.958042	0.615385	0.850144	0.80011
13240	1	0.607143	0.857143	0.875	0.8125	0.951049	0.692308	0.85879	0.811959
13250	1	0.660714	0.928571	0.9375	0.8125	0.951049	0.769231	0.876081	0.835635
13260	1	0.642857	0.785714	0.9375	0.796875	0.951049	0.769231	0.864553	0.819796
13270	1	0.625	0.928571	0.9375	0.796875	0.944056	0.769231	0.864553	0.820139
13280	1	0.607143	0.857143	0.8125	0.75	0.944056	0.692308	0.841499	0.789154
13290	1	0.625	0.857143	0.875	0.8125	0.958042	0.615385	0.861671	0.815993
13300	1	0.678571	0.928571	0.875	0.8125	0.944056	0.692308	0.870317	0.827159
13310	1	0.625	0.857143	0.8125	0.78125	0.944056	0.692308	0.850144	0.800136
13320	1	0.625	0.928571	0.9375	0.78125	0.965035	0.692308	0.867435	0.824944
13330	1	0.642857	0.714286	0.9375	0.8125	0.951049	0.692308	0.861671	0.815814
13340	1	0.607143	0.785714	0.875	0.796875	0.951049	0.769231	0.855908	0.808328
13350	0.97561	0.642857	0.928571	0.8125	0.78125	0.944056	0.615385	0.850144	0.800561
13360	1	0.589286	0.928571	0.75	0.765625	0.972028	0.692308	0.853026	0.806633
13370	1	0.625	0.928571	0.875	0.765625	0.965035	0.692308	0.861671	0.817405
13380	1	0.642857	0.714286	0.9375	0.796875	0.951049	0.615385	0.855908	0.807697
13390	1	0.589286	0.928571	0.875	0.796875	0.965035	0.692308	0.861671	0.817856
13400	1	0.660714	0.785714	0.875	0.828125	0.944056	0.769231	0.867435	0.822917
13410	1	0.660714	0.857143	0.9375	0.796875	0.944056	0.692308	0.864553	0.819612
13420	1	0.553571	0.785714	0.9375	0.765625	0.965035	0.615385	0.84438	0.79441
13430	1	0.678571	0.928571	1	0.796875	0.937063	0.769231	0.873199	0.831208
13440	1	0.607143	0.928571	0.8125	0.796875	0.965035	0.846154	0.867435	0.82482
13450	1	0.678571	0.928571	0.875	0.796875	0.958042	0.692308	0.873199	0.831604
13460	1	0.625	0.857143	1	0.796875	0.951049	0.769231	0.867435	0.824345
13470	0.97561	0.642857	0.928571	0.875	0.8125	0.951049	0.769231	0.867435	0.823734
13480	1	0.571429	0.857143	0.875	0.78125	0.972028	0.692308	0.855908	0.810243
13490	1	0.571429	0.857143	1	0.796875	0.958042	0.769231	0.861671	0.817248
13500	1	0.696429	0.857143	0.875	0.78125	0.965035	0.692308	0.873199	0.831656
13510	1	0.642857	0.928571	0.875	0.8125	0.93007	0.692308	0.85879	0.811266
13520	1	0.571429	0.928571	0.9375	0.78125	0.972028	0.769231	0.864553	0.822383
13530	1	0.642857	0.857143	0.875	0.78125	0.944056	0.692308	0.855908	0.807402
13540	1	0.642857	0.928571	0.9375	0.796875	0.972028	0.769231	0.878963	0.840983
13550	1	0.642857	0.928571	0.8125	0.796875	0.944056	0.692308	0.85879	0.811721
13560	1	0.589286	0.857143	0.9375	0.796875	0.958042	0.769231	0.861671	0.816842
13570	1	0.625	1	0.8125	0.828125	0.972028	0.769231	0.878963	0.840707
13580	1	0.678571	0.785714	0.875	0.796875	0.958042	0.615385	0.864553	0.819488
13590	1	0.660714	0.928571	1	0.78125	0.965035	0.692308	0.876081	0.836231
13600	1	0.660714	0.857143	0.9375	0.796875	0.958042	0.692308	0.870317	0.8279
13610	1	0.642857	0.928571	0.9375	0.765625	0.958042	0.615385	0.861671	0.817031
13620	1	0.625	0.857143	1	0.78125	0.965035	0.692308	0.867435	0.825079
13630	1	0.625	0.857143	0.8125	0.78125	0.951049	0.846154	0.85879	0.812591
13640	1	0.607143	0.857143	0.875	0.8125	0.93007	0.769231	0.853026	0.803723
13650	1	0.660714	0.928571	0.875	0.8125	0.979021	0.846154	0.887608	0.852197
13660	1	0.660714	0.857143	0.875	0.796875	0.958042	0.846154	0.873199	0.831999
13670	1	0.607143	0.857143	1	0.765625	0.972028	0.615385	0.861671	0.81774
13680	0.97561	0.642857	0.785714	0.875	0.796875	0.951049	0.769231	0.85879	0.81206
13690	1	0.660714	0.928571	0.875	0.84375	0.965035	0.692308	0.881844	0.843502
13700	1	0.571429	0.785714	1	0.8125	0.937063	0.769231	0.853026	0.804377
13710	1	0.625	0.928571	0.9375	0.78125	0.972028	0.846154	0.876081	0.837904
13720	1	0.642857	0.857143	0.75	0.78125	0.958042	0.769231	0.85879	0.812402
13730	1	0.660714	0.928571	0.8125	0.8125	0.965035	0.769231	0.876081	0.83591
13740	1	0.660714	0.928571	0.9375	0.78125	0.944056	0.846154	0.870317	0.827722
13750	1	0.678571	0.928571	0.875	0.8125	0.958042	0.769231	0.878963	0.839162
13760	1	0.642857	0.714286	1	0.8125	0.965035	0.615385	0.867435	0.823847
13770	1	0.714286	0.857143	0.9375	0.8125	0.93007	0.692308	0.870317	0.8263
13780	1	0.625	0.785714	1	0.765625	0.958042	0.692308	0.85879	0.812456
13790	1	0.678571	0.857143	0.9375	0.78125	0.958042	0.692308	0.870317	0.827996
13800	1	0.696429	0.928571	1	0.8125	0.965035	0.769231	0.89049	0.855177
13810	1	0.660714	0.714286	0.9375	0.8125	0.958042	0.846154	0.873199	0.831531
13820	1	0.642857	0.785714	1	0.765625	0.958042	0.769231	0.864553	0.820471
13830	1	0.625	0.857143	1	0.796875	0.965035	0.692308	0.870317	0.828601
13840	1	0.696429	0.714286	0.875	0.78125	0.979021	0.692308	0.873199	0.831507
13850	1	0.642857	0.714286	0.875	0.796875	0.944056	0.692308	0.853026	0.803401
13860	1	0.660714	0.928571	0.9375	0.8125	0.958042	0.615385	0.873199	0.83185
13870	1	0.642857	0.928571	0.875	0.796875	0.965035	0.692308	0.870317	0.828229
13880	1	0.678571	0.857143	0.875	0.796875	0.93007	0.692308	0.85879	0.810999
13890	1	0.642857	0.857143	0.9375	0.796875	0.944056	0.769231	0.864553	0.819604
13900	1	0.625	0.857143	0.875	0.828125	0.972028	0.769231	0.876081	0.836551
13910	1	0.660714	0.857143	0.875	0.796875	0.951049	0.692308	0.864553	0.819599
13920	1	0.589286	0.928571	0.875	0.8125	0.979021	0.692308	0.870317	0.830134
13930	1	0.589286	0.785714	0.9375	0.828125	0.944056	0.769231	0.85879	0.812173
13940	1	0.625	0.928571	0.9375	0.796875	0.958042	0.769231	0.870317	0.828808
13950	1	0.642857	0.857143	0.9375	0.8125	0.958042	0.769231	0.873199	0.831646
13960	1	0.660714	0.857143	0.875	0.796875	0.937063	0.692308	0.85879	0.81135
13970	1	0.625	0.857143	0.9375	0.796875	0.965035	0.769231	0.870317	0.828814
13980	1	0.678571	0.928571	0.9375	0.8125	0.958042	0.769231	0.881844	0.843499
13990	1	0.625	0.785714	0.875	0.796875	0.944056	0.692308	0.853026	0.80386
14000	1	0.660714	0.928571	0.875	0.765625	0.944056	0.769231	0.861671	0.815858
14010	1	0.589286	0.857143	0.8125	0.796875	0.958042	0.615385	0.850144	0.801023
14020	1	0.642857	0.785714	0.75	0.8125	0.965035	0.692308	0.861671	0.816124
14030	1	0.625	0.857143	0.75	0.78125	0.951049	0.692308	0.850144	0.800936
14040	1	0.607143	0.857143	0.8125	0.78125	0.93007	0.769231	0.84438	0.791894
14050	1	0.625	0.785714	0.875	0.78125	0.965035	0.769231	0.861671	0.817279
14060	1	0.589286	0.714286	0.875	0.796875	0.965035	0.769231	0.855908	0.809405
14070	1	0.607143	0.785714	0.75	0.765625	0.972028	0.769231	0.853026	0.805418
14080	1	0.625	0.857143	0.9375	0.78125	0.93007	0.615385	0.847262	0.795948
14090	1	0.660714	0.714286	0.9375	0.78125	0.951049	0.615385	0.855908	0.807384
14100	1	0.589286	0.928571	0.875	0.765625	0.965035	0.692308	0.855908	0.810295
14110	1	0.589286	0.928571	0.75	0.75	0.944056	0.615385	0.835735	0.780977
14120	1	0.589286	0.785714	1	0.78125	0.972028	0.692308	0.861671	0.817695
14130	1	0.678571	0.785714	0.9375	0.8125	0.937063	0.769231	0.867435	0.822866
14140	1	0.660714	0.928571	0.9375	0.78125	0.951049	0.615385	0.864553	0.82012
14150	1	0.625	0.928571	0.875	0.796875	0.965035	0.692308	0.867435	0.824607
14160	1	0.589286	0.785714	1	0.796875	0.944056	0.615385	0.850144	0.80065
14170	1	0.589286	0.714286	0.9375	0.796875	0.944056	0.846154	0.853026	0.804436
14180	1	0.607143	0.785714	0.8125	0.765625	0.951049	0.769231	0.847262	0.796684
14190	1	0.696429	0.857143	0.9375	0.78125	0.965035	0.692308	0.876081	0.835535
14200	0.97561	0.642857	1	1	0.796875	0.972028	0.538462	0.873199	0.833229
14210	1	0.553571	0.857143	1	0.796875	0.944056	0.615385	0.847262	0.797005
14220	1	0.607143	0.928571	0.9375	0.734375	0.958042	0.692308	0.853026	0.805763
14230	1	0.607143	0.857143	0.9375	0.78125	0.965035	0.769231	0.864553	0.821204
14240	1	0.625	0.928571	0.9375	0.75	0.944056	0.846154	0.85879	0.813104
14250	1	0.589286	0.857143	0.9375	0.796875	0.944056	0.769231	0.855908	0.808601
14260	1	0.625	0.714286	0.75	0.765625	0.979021	0.769231	0.855908	0.810253
14270	1	0.571429	0.857143	1	0.78125	0.958042	0.769231	0.85879	0.813708
14280	1	0.607143	0.928571	0.8125	0.796875	0.958042	0.692308	0.85879	0.812721
14290	1	0.607143	0.857143	0.875	0.828125	0.944056	0.769231	0.861671	0.815993
14300	1	0.607143	0.714286	0.875	0.78125	0.965035	0.692308	0.853026	0.805275
14310	1	0.625	0.857143	0.875	0.78125	0.951049	0.846154	0.861671	0.816397
14320	1	0.660714	0.714286	0.875	0.75	0.951049	0.692308	0.850144	0.799895
14330	1	0.625	0.928571	0.8125	0.78125	0.958042	0.692308	0.85879	0.812721
14340	1	0.625	0.785714	0.875	0.796875	0.951049	0.538462	0.850144	0.799644
14350	1	0.589286	0.928571	0.9375	0.8125	0.972028	0.769231	0.873199	0.833183
14360	1	0.589286	1	0.75	0.765625	0.944056	0.769231	0.847262	0.797504
14370	1	0.607143	0.785714	0.8125	0.75	0.965035	0.769231	0.850144	0.802088
14380	1	0.660714	0.785714	0.875	0.828125	0.965035	0.615385	0.870317	0.827556
14390	1	0.589286	0.857143	1	0.796875	0.958042	0.846154	0.867435	0.825076
14400	1	0.607143	0.785714	0.9375	0.796875	0.958042	0.692308	0.85879	0.812699
14410	1	0.625	1	0.9375	0.8125	0.951049	0.692308	0.870317	0.828183
14420	1	0.660714	0.928571	0.8125	0.796875	0.951049	0.769231	0.867435	0.823405
14430	1	0.607143	0.857143	0.875	0.78125	0.951049	0.692308	0.853026	0.804392
14440	1	0.660714	0.642857	0.875	0.796875	0.951049	0.615385	0.853026	0.80339
14450	0.97561	0.589286	0.857143	0.8125	0.765625	0.951049	0.615385	0.838617	0.784898
14460	1	0.625	0.714286	0.9375	0.78125	0.944056	0.692308	0.850144	0.800168
14470	1	0.660714	0.857143	1	0.796875	0.944056	0.846154	0.873199	0.831284
14480	1	0.607143	0.857143	0.8125	0.796875	0.958042	0.846154	0.861671	0.816701
14490	1	0.642857	0.928571	0.875	0.796875	0.958042	0.692308	0.867435	0.82437
14500	1	0.642857	0.857143	0.9375	0.828125	0.965035	0.846154	0.881844	0.843674
14510	1	0.625	0.928571	0.8125	0.765625	0.972028	0.615385	0.85879	0.813778
14520	1	0.607143	0.857143	0.8125	0.78125	0.958042	0.692308	0.853026	0.804844
14530	1	0.642857	0.928571	1	0.796875	0.944056	0.615385	0.864553	0.819684
14540	1	0.625	0.785714	0.875	0.765625	0.958042	0.615385	0.850144	0.800914
14550	1	0.589286	1	0.875	0.78125	0.958042	0.692308	0.85879	0.81383
14560	1	0.660714	0.928571	0.8125	0.765625	0.944056	0.615385	0.853026	0.804095
14570	1	0.607143	0.785714	0.9375	0.796875	0.958042	0.769231	0.861671	0.816462
14580	1	0.642857	0.928571	0.9375	0.765625	0.965035	0.692308	0.867435	0.82509
14590	1	0.678571	0.928571	0.875	0.796875	0.958042	0.846154	0.878963	0.839726
14600	1	0.642857	0.714286	1	0.78125	0.965035	0.769231	0.867435	0.824782
14610	1	0.625	0.785714	0.9375	0.78125	0.965035	0.769231	0.864553	0.821098
14620	1	0.642857	0.714286	0.9375	0.8125	0.944056	0.615385	0.855908	0.807119
14630	1	0.642857	0.785714	0.875	0.8125	0.965035	0.769231	0.870317	0.828423
14640	1	0.571429	0.928571	0.6875	0.796875	0.958042	0.769231	0.850144	0.802364
14650	1	0.625	0.928571	0.875	0.8125	0.944056	0.692308	0.861671	0.815867
14660	1	0.589286	0.928571	0.8125	0.796875	0.951049	0.692308	0.853026	0.805046
14670	1	0.660714	1	0.875	0.78125	0.958042	0.769231	0.873199	0.832449
14680	1	0.678571	0.928571	0.875	0.796875	0.979021	0.692308	0.881844	0.844353
14690	1	0.660714	0.785714	0.875	0.78125	0.965035	0.692308	0.864553	0.820222
14700	1	0.660714	0.928571	0.9375	0.796875	0.951049	0.538462	0.864553	0.820012
14710	1	0.589286	0.857143	0.8125	0.796875	0.951049	0.769231	0.853026	0.804696
14720	1	0.625	0.928571	0.9375	0.765625	0.958042	0.692308	0.861671	0.817113
14730	1	0.607143	0.785714	0.8125	0.8125	0.951049	0.769231	0.855908	0.808036
14740	1	0.625	0.785714	0.875	0.796875	0.958042	0.692308	0.85879	0.812192
14750	1	0.642857	0.857143	0.875	0.8125	0.965035	0.846154	0.876081	0.836129
14760	1	0.589286	0.928571	0.9375	0.796875	0.958042	0.846154	0.867435	0.825245
14770	1	0.607143	0.857143	0.8125	0.765625	0.972028	0.769231	0.85879	0.813768
14780	1	0.589286	0.785714	0.875	0.765625	0.958042	0.769231	0.850144	0.801853
14790	1	0.714286	0.857143	0.875	0.796875	0.965035	0.769231	0.881844	0.84344
14800	1	0.589286	0.785714	0.9375	0.796875	0.965035	0.615385	0.855908	0.809337
14810	0.97561	0.642857	0.857143	0.875	0.765625	0.965035	0.769231	0.861671	0.816842
14820	1	0.607143	0.857143	0.875	0.765625	0.958042	0.692308	0.853026	0.804961
14830	1	0.642857	0.857143	0.875	0.78125	0.965035	0.692308	0.864553	0.820466
14840	1	0.607143	0.857143	1	0.8125	0.958042	0.692308	0.867435	0.82472
14850	1	0.642857	0.785714	0.875	0.78125	0.951049	0.769231	0.85879	0.812168
14860	1	0.625	0.857143	0.875	0.796875	0.972028	0.769231	0.870317	0.829096
14870	1	0.589286	0.785714	0.9375	0.796875	0.951049	0.769231	0.855908	0.808622
14880	1	0.607143	0.928571	0.8125	0.796875	0.944056	0.769231	0.855908	0.808629
14890	1	0.660714	0.857143	0.9375	0.8125	0.951049	0.692308	0.870317	0.827433
14900	1	0.589286	0.928571	0.9375	0.765625	0.965035	0.692308	0.85879	0.813635
14910	1	0.642857	0.857143	1	0.8125	0.951049	0.769231	0.873199	0.831557
14920	1	0.607143	0.785714	0.9375	0.8125	0.937063	0.692308	0.853026	0.803952
14930	1	0.660714	0.785714	0.875	0.78125	0.937063	0.615385	0.850144	0.799347
14940	1	0.660714	1	0.9375	0.75	0.958042	0.769231	0.870317	0.829217
14950	1	0.607143	0.785714	0.875	0.796875	0.965035	0.769231	0.861671	0.816775
14960	1	0.642857	0.857143	0.875	0.796875	0.965035	0.769231	0.870317	0.828417
14970	1	0.607143	0.857143	0.875	0.796875	0.944056	0.692308	0.853026	0.804338
14980	1	0.625	0.785714	0.8125	0.8125	0.944056	0.692308	0.853026	0.803813
14990	1	0.625	0.928571	0.9375	0.765625	0.972028	0.769231	0.870317	0.829359
15000	1	0.607143	0.928571	0.8125	0.796875	0.972028	0.692308	0.864553	0.821949
15010	1	0.607143	0.928571	0.875	0.78125	0.965035	0.769231	0.864553	0.821076
15020	1	0.642857	0.857143	0.875	0.765625	0.951049	0.692308	0.855908	0.8084
15030	1	0.607143	0.785714	0.75	0.78125	0.944056	0.769231	0.84438	0.792764
15040	1	0.642857	0.928571	0.75	0.796875	0.951049	0.769231	0.861671	0.816034
15050	1	0.678571	0.785714	0.9375	0.765625	0.951049	0.769231	0.864553	0.819816
15060	1	0.678571	0.785714	0.875	0.828125	0.944056	0.538462	0.861671	0.814674
15070	1	0.660714	0.785714	0.9375	0.8125	0.958042	0.615385	0.867435	0.823244
15080	1	0.660714	0.714286	0.875	0.796875	0.965035	0.769231	0.867435	0.824331
15090	1	0.642857	0.857143	0.9375	0.78125	0.972028	0.692308	0.870317	0.82877
15100	1	0.642857	0.785714	1	0.8125	0.958042	0.769231	0.873199	0.831573
15110	1	0.642857	1	0.875	0.796875	0.951049	0.769231	0.870317	0.828215
15120	1	0.553571	0.785714	0.75	0.8125	0.958042	0.769231	0.847262	0.797278
15130	1	0.625	0.857143	0.8125	0.765625	0.944056	0.692308	0.847262	0.79636
15140	1	0.642857	0.857143	0.875	0.78125	0.965035	0.846154	0.870317	0.828625
15150	1	0.625	0.714286	0.9375	0.765625	0.979021	0.692308	0.861671	0.817521
15160	1	0.607143	0.785714	0.8125	0.78125	0.958042	0.538462	0.84438	0.79297
15170	1	0.607143	0.928571	0.875	0.796875	0.972028	0.692308	0.867435	0.825785
15180	1	0.625	0.857143	0.875	0.796875	0.951049	0.769231	0.861671	0.816159
15190	1	0.607143	0.642857	0.875	0.8125	0.979021	0.615385	0.85879	0.812488
15200	1	0.553571	0.928571	0.875	0.796875	0.972028	0.692308	0.85879	0.814814
15210	1	0.642857	0.785714	0.9375	0.828125	0.965035	0.692308	0.873199	0.831906
15220	1	0.642857	0.857143	1	0.796875	0.972028	0.615385	0.873199	0.832717
15230	0.97561	0.678571	0.857143	0.875	0.8125	0.951049	0.769231	0.870317	0.826984
15240	1	0.625	0.857143	0.9375	0.828125	0.972028	0.692308	0.876081	0.836549
15250	1	0.625	0.857143	0.8125	0.796875	0.944056	0.769231	0.855908	0.8081
15260	0.97561	0.678571	0.928571	0.9375	0.78125	0.965035	0.615385	0.870317	0.828138
15270	1	0.660714	0.785714	1	0.78125	0.944056	0.692308	0.861671	0.815631
15280	1	0.625	0.928571	0.6875	0.796875	0.958042	0.615385	0.853026	0.80409
15290	1	0.589286	0.857143	1	0.765625	0.951049	0.615385	0.850144	0.801124
15300	1	0.642857	0.928571	0.875	0.75	0.958042	0.769231	0.861671	0.816862
15310	1	0.642857	0.857143	0.9375	0.78125	0.937063	0.769231	0.85879	0.811747
15320	0.97561	0.589286	0.857143	0.875	0.765625	0.965035	0.615385	0.847262	0.798047
15330	1	0.642857	0.785714	0.8125	0.765625	0.951049	0.769231	0.853026	0.804392
15340	1	0.607143	0.857143	0.875	0.765625	0.951049	0.615385	0.847262	0.797318
15350	1	0.642857	0.857143	0.875	0.78125	0.937063	0.692308	0.853026	0.803588
15360	1	0.607143	0.857143	0.9375	0.796875	0.93007	0.846154	0.855908	0.808092
15370	1	0.678571	0.785714	0.8125	0.75	0.951049	0.692308	0.853026	0.803918
15380	1	0.589286	0.785714	0.75	0.78125	0.958042	0.615385	0.841499	0.789293
15390	1	0.678571	0.857143	0.625	0.8125	0.965035	0.769231	0.867435	0.823906
15400	1	0.642857	0.785714	0.8125	0.8125	0.958042	0.538462	0.855908	0.807765
15410	1	0.642857	0.928571	1	0.78125	0.972028	0.692308	0.876081	0.837231
15420	1	0.678571	0.785714	0.8125	0.796875	0.944056	0.692308	0.85879	0.811117
15430	1	0.625	0.857143	0.9375	0.796875	0.965035	0.846154	0.873199	0.832364
15440	1	0.625	0.857143	0.875	0.765625	0.958042	0.692308	0.855908	0.809096
15450	1	0.660714	0.928571	0.9375	0.8125	0.958042	0.769231	0.878963	0.839645
15460	1	0.642857	0.928571	0.9375	0.8125	0.965035	0.769231	0.878963	0.840362
15470	1	0.607143	0.928571	0.8125	0.8125	0.944056	0.846154	0.861671	0.816377
15480	1	0.714286	0.785714	0.875	0.8125	0.965035	0.769231	0.881844	0.842961
15490	1	0.607143	0.785714	0.9375	0.765625	0.965035	0.769231	0.85879	0.813412
15500	1	0.625	0.714286	0.8125	0.8125	0.965035	0.769231	0.861671	0.816808
15510	0.97561	0.625	0.785714	0.875	0.796875	0.965035	0.692308	0.85879	0.813217
15520	1	0.607143	1	0.875	0.796875	0.958042	0.769231	0.867435	0.825166
15530	1	0.642857	0.928571	1	0.8125	0.965035	0.846154	0.884726	0.848076
15540	1	0.660714	0.785714	1	0.78125	0.958042	0.769231	0.870317	0.827974
15550	1	0.625	0.857143	0.8125	0.78125	0.979021	0.692308	0.864553	0.821213
15560	1	0.660714	0.928571	0.9375	0.78125	0.958042	0.769231	0.873199	0.832262
15570	1	0.642857	0.857143	0.875	0.765625	0.958042	0.692308	0.85879	0.812566
15580	1	0.660714	0.928571	0.875	0.78125	0.944056	0.615385	0.85879	0.811684
15590	1	0.589286	0.928571	0.9375	0.796875	0.965035	0.615385	0.861671	0.817644
15600	1	0.660714	0.785714	0.875	0.796875	0.944056	0.615385	0.855908	0.806954
15610	1	0.642857	0.857143	1	0.765625	0.937063	0.769231	0.85879	0.812096
15620	1	0.625	0.857143	0.9375	0.796875	0.965035	0.769231	0.870317	0.828881
15630	1	0.642857	0.857143	1	0.78125	0.951049	0.769231	0.867435	0.824003
15640	1	0.696429	0.928571	0.8125	0.796875	0.965035	0.769231	0.878963	0.839615
15650	0.97561	0.625	0.785714	0.75	0.8125	0.951049	0.615385	0.847262	0.795576
15660	1	0.678571	0.785714	0.625	0.78125	0.944056	0.615385	0.84438	0.791076
15670	1	0.625	0.714286	0.875	0.78125	0.944056	0.692308	0.847262	0.796063
15680	1	0.625	0.785714	0.9375	0.78125	0.965035	0.692308	0.861671	0.816554
15690	1	0.642857	0.928571	0.8125	0.796875	0.972028	0.692308	0.870317	0.828902
15700	1	0.589286	0.857143	0.8125	0.796875	0.937063	0.615385	0.841499	0.787926
15710	1	0.642857	0.857143	0.8125	0.765625	0.958042	0.769231	0.85879	0.812546
15720	1	0.642857	0.928571	0.8125	0.8125	0.965035	0.615385	0.867435	0.82428
15730	1	0.625	0.857143	0.6875	0.796875	0.958042	0.692308	0.853026	0.804824
15740	1	0.589286	0.857143	0.875	0.8125	0.944056	0.692308	0.853026	0.804561
15750	1	0.625	0.785714	0.625	0.78125	0.951049	0.692308	0.841499	0.788827
15760	1	0.589286	0.857143	1	0.765625	0.951049	0.615385	0.850144	0.801416
15770	1	0.625	0.928571	1	0.796875	0.965035	0.615385	0.870317	0.828664
15780	1	0.660714	0.857143	0.8125	0.78125	0.951049	0.692308	0.85879	0.811973
15790	1	0.571429	0.785714	0.8125	0.8125	0.979021	0.615385	0.855908	0.809652
15800	1	0.625	0.928571	0.75	0.78125	0.937063	0.692308	0.847262	0.796361
15810	1	0.607143	1	0.75	0.796875	0.944056	0.692308	0.853026	0.804213
15820	1	0.607143	0.785714	0.75	0.78125	0.979021	0.538462	0.850144	0.801762
15830	1	0.625	0.857143	0.8125	0.828125	0.965035	0.615385	0.864553	0.820063
15840	1	0.607143	0.714286	0.75	0.796875	0.951049	0.615385	0.841499	0.788452
15850	1	0.642857	0.785714	0.9375	0.796875	0.958042	0.615385	0.861671	0.815893
15860	1	0.625	0.785714	0.9375	0.78125	0.951049	0.692308	0.855908	0.807933
15870	0.97561	0.589286	0.928571	0.9375	0.8125	0.958042	0.692308	0.861671	0.817439
15880	1	0.660714	0.928571	0.9375	0.78125	0.951049	0.769231	0.870317	0.827898
15890	1	0.625	0.785714	0.75	0.75	0.951049	0.692308	0.841499	0.788752
15900	1	0.625	0.857143	0.8125	0.78125	0.944056	0.692308	0.850144	0.800136
15910	1	0.625	0.928571	0.8125	0.78125	0.951049	0.769231	0.85879	0.812537
15920	1	0.642857	0.857143	0.75	0.78125	0.958042	0.769231	0.85879	0.812348
15930	0.97561	0.625	0.857143	0.9375	0.765625	0.93007	0.692308	0.84438	0.791947
15940	1	0.642857	0.928571	0.8125	0.78125	0.951049	0.769231	0.861671	0.815911
15950	1	0.589286	0.714286	0.875	0.8125	0.958042	0.615385	0.850144	0.800289
15960	1	0.642857	0.857143	0.9375	0.796875	0.951049	0.769231	0.867435	0.823902
15970	1	0.642857	0.857143	0.875	0.765625	0.951049	0.769231	0.85879	0.812146
15980	1	0.625	0.928571	0.8125	0.8125	0.965035	0.615385	0.864553	0.819945
15990	1	0.642857	0.785714	0.875	0.796875	0.972028	0.769231	0.870317	0.828613
16000	1	0.571429	0.857143	0.875	0.828125	0.965035	0.615385	0.85879	0.812765
16010	1	0.642857	0.642857	0.9375	0.796875	0.951049	0.769231	0.85879	0.811538
16020	1	0.642857	0.714286	1	0.765625	0.958042	0.692308	0.85879	0.812265
16030	1	0.607143	0.857143	0.9375	0.78125	0.951049	0.615385	0.853026	0.80461
16040	1	0.607143	0.785714	0.75	0.828125	0.944056	0.538462	0.84438	0.791498
16050	1	0.642857	0.714286	0.875	0.75	0.944056	0.769231	0.847262	0.796187
16060	1	0.660714	0.857143	0.6875	0.796875	0.965035	0.692308	0.861671	0.816401
16070	1	0.642857	0.857143	0.875	0.796875	0.958042	0.538462	0.85879	0.812188
16080	1	0.660714	0.928571	0.75	0.75	0.944056	0.615385	0.847262	0.796524
16090	1	0.625	0.857143	0.875	0.8125	0.965035	0.769231	0.870317	0.82781
16100	1	0.571429	0.928571	0.8125	0.765625	0.944056	0.692308	0.841499	0.78899
16110	1	0.678571	0.714286	1	0.78125	0.951049	0.692308	0.864553	0.81935
16120	1	0.660714	0.928571	0.9375	0.78125	0.944056	0.615385	0.861671	0.815815
16130	1	0.571429	0.714286	0.875	0.765625	0.965035	0.615385	0.841499	0.789794
16140	1	0.625	1	0.8125	0.765625	0.951049	0.692308	0.855908	0.809167
16150	1	0.607143	0.857143	0.875	0.796875	0.965035	0.692308	0.861671	0.817048
16160	0.97561	0.625	0.857143	1	0.78125	0.93007	0.692308	0.850144	0.799938
16170	1	0.660714	0.857143	0.8125	0.828125	0.972028	0.615385	0.873199	0.831411
16180	1	0.642857	0.785714	0.9375	0.796875	0.965035	0.615385	0.864553	0.82054
16190	1	0.642857	0.857143	0.9375	0.75	0.958042	0.538462	0.853026	0.805227
16200	1	0.642857	0.857143	0.8125	0.78125	0.958042	0.769231	0.861671	0.816534
16210	1	0.678571	0.785714	0.875	0.78125	0.965035	0.846154	0.873199	0.83206
16220	1	0.607143	0.857143	0.9375	0.796875	0.965035	0.692308	0.864553	0.820612
16230	1	0.625	0.714286	0.8125	0.78125	0.951049	0.769231	0.850144	0.800399
16240	1	0.660714	0.857143	0.875	0.8125	0.958042	0.769231	0.873199	0.831632
16250	1	0.607143	0.785714	0.75	0.8125	0.958042	0.615385	0.850144	0.800848
16260	1	0.625	0.785714	0.8125	0.8125	0.965035	0.615385	0.85879	0.81249
16270	1	0.589286	0.642857	0.8125	0.796875	0.958042	0.615385	0.841499	0.78885
16280	1	0.553571	0.642857	0.9375	0.8125	0.972028	0.769231	0.855908	0.810174
16290	1	0.660714	0.928571	0.75	0.765625	0.951049	0.692308	0.855908	0.808203
16300	1	0.642857	0.785714	0.9375	0.8125	0.944056	0.615385	0.85879	0.811273
16310	1	0.642857	0.714286	0.75	0.78125	0.979021	0.692308	0.85879	0.812885
16320	1	0.535714	0.857143	0.75	0.78125	0.944056	0.692308	0.832853	0.777679
16330	1	0.660714	0.785714	0.8125	0.78125	0.951049	0.769231	0.85879	0.811562
16340	1	0.625	0.785714	0.9375	0.796875	0.965035	0.769231	0.867435	0.824373
16350	1	0.642857	0.785714	0.6875	0.796875	0.965035	0.615385	0.853026	0.804122
16360	1	0.642857	0.857143	0.75	0.765625	0.965035	0.846154	0.861671	0.817206
16370	0.97561	0.625	0.785714	0.875	0.796875	0.951049	0.692308	0.853026	0.804232
16380	1	0.607143	0.857143	0.875	0.765625	0.958042	0.615385	0.850144	0.801022
16390	1	0.660714	0.928571	0.9375	0.765625	0.979021	0.692308	0.876081	0.837385
16400	1	0.642857	0.785714	0.875	0.796875	0.937063	0.615385	0.850144	0.799493
16410	1	0.607143	0.928571	0.8125	0.78125	0.944056	0.846154	0.855908	0.808375
16420	1	0.714286	0.857143	1	0.78125	0.958042	0.615385	0.876081	0.835279
16430	1	0.625	0.857143	0.9375	0.796875	0.958042	0.615385	0.861671	0.815758
16440	1	0.589286	0.857143	1	0.78125	0.965035	0.769231	0.864553	0.821637
16450	1	0.696429	0.785714	0.875	0.765625	0.951049	0.769231	0.864553	0.819489
16460	1	0.625	0.928571	0.875	0.765625	0.958042	0.615385	0.855908	0.808841
16470	1	0.642857	0.571429	0.875	0.765625	0.951049	0.615385	0.841499	0.787847
16480	1	0.642857	0.857143	0.9375	0.765625	0.965035	0.692308	0.864553	0.820911
16490	1	0.625	0.714286	0.875	0.78125	0.951049	0.692308	0.850144	0.800102
16500	1	0.642857	0.857143	1	0.796875	0.972028	0.692308	0.876081	0.836933
16510	1	0.607143	0.928571	1	0.78125	0.958042	0.692308	0.864553	0.820866
16520	1	0.660714	1	0.875	0.796875	0.965035	0.692308	0.876081	0.836268
16530	1	0.607143	0.857143	0.9375	0.78125	0.958042	0.769231	0.861671	0.816526
16540	1	0.625	0.785714	0.8125	0.78125	0.951049	0.692308	0.850144	0.800482
16550	0.97561	0.625	0.714286	0.9375	0.765625	0.944056	0.846154	0.850144	0.800326
16560	1	0.642857	0.857143	0.8125	0.765625	0.965035	0.615385	0.855908	0.808523
16570	1	0.625	0.857143	0.875	0.78125	0.958042	0.615385	0.855908	0.809038
16580	1	0.589286	0.928571	0.75	0.765625	0.972028	0.615385	0.850144	0.802297
16590	1	0.607143	0.785714	1	0.796875	0.972028	0.692308	0.867435	0.825316
16600	1	0.642857	0.857143	0.875	0.78125	0.951049	0.615385	0.855908	0.808114
16610	1	0.607143	0.785714	0.8125	0.796875	0.951049	0.769231	0.853026	0.804732
16620	1	0.589286	0.785714	0.8125	0.765625	0.965035	0.615385	0.84438	0.793419
16630	1	0.607143	0.785714	0.9375	0.796875	0.958042	0.692308	0.85879	0.812832
16640	1	0.642857	0.928571	0.75	0.765625	0.965035	0.615385	0.855908	0.809434
16650	1	0.571429	0.857143	0.875	0.796875	0.951049	0.769231	0.853026	0.804594
16660	1	0.642857	0.785714	0.875	0.796875	0.972028	0.692308	0.867435	0.824836
16670	1	0.589286	0.785714	0.875	0.78125	0.958042	0.769231	0.853026	0.805524
16680	1	0.625	0.785714	0.9375	0.765625	0.972028	0.692308	0.861671	0.817897
16690	0.97561	0.660714	0.857143	0.875	0.765625	0.958042	0.692308	0.85879	0.812104
16700	1	0.589286	0.928571	0.8125	0.78125	0.958042	0.769231	0.855908	0.808853
16710	1	0.660714	0.857143	0.9375	0.796875	0.958042	0.692308	0.870317	0.827829
16720	1	0.625	0.785714	0.875	0.765625	0.965035	0.769231	0.85879	0.813729
16730	1	0.642857	0.857143	0.875	0.796875	0.951049	0.769231	0.864553	0.819517
16740	1	0.642857	0.928571	0.875	0.8125	0.972028	0.769231	0.878963	0.840464
16750	1	0.642857	0.857143	0.9375	0.78125	0.979021	0.692308	0.873199	0.832978
16760	1	0.607143	0.785714	0.8125	0.796875	0.972028	0.615385	0.855908	0.808842
16770	0.97561	0.660714	1	0.75	0.78125	0.958042	0.692308	0.861671	0.81693
16780	0.97561	0.660714	0.928571	0.8125	0.78125	0.965035	0.692308	0.864553	0.82084
16790	1	0.642857	0.714286	0.875	0.796875	0.951049	0.615385	0.853026	0.803823
16800	0.97561	0.607143	0.642857	0.9375	0.765625	0.965035	0.615385	0.84438	0.793047
16810	1	0.589286	0.857143	0.875	0.765625	0.972028	0.769231	0.85879	0.814254
16820	1	0.607143	0.785714	0.9375	0.765625	0.965035	0.692308	0.855908	0.809349
16830	1	0.660714	0.785714	0.8125	0.796875	0.965035	0.692308	0.864553	0.819571
16840	1	0.607143	0.714286	0.8125	0.765625	0.958042	0.692308	0.84438	0.792621
16850	1	0.642857	0.857143	0.9375	0.765625	0.965035	0.692308	0.864553	0.821026
16860	1	0.625	0.785714	0.8125	0.796875	0.958042	0.692308	0.855908	0.808408
16870	1	0.589286	0.857143	0.8125	0.828125	0.958042	0.692308	0.85879	0.812626
16880	1	0.642857	0.857143	0.8125	0.78125	0.972028	0.769231	0.867435	0.825328
16890	1	0.571429	0.714286	0.875	0.796875	0.93007	0.692308	0.835735	0.779872
16900	1	0.660714	0.785714	0.8125	0.828125	0.972028	0.692308	0.873199	0.831394
16910	1	0.625	0.857143	0.9375	0.8125	0.937063	0.615385	0.855908	0.807296
16920	1	0.571429	0.857143	0.875	0.796875	0.958042	0.692308	0.853026	0.805107
16930	1	0.678571	0.714286	0.75	0.765625	0.972028	0.538462	0.853026	0.804712
16940	1	0.625	0.857143	0.75	0.765625	0.972028	0.615385	0.853026	0.805589
16950	1	0.625	1	0.875	0.78125	0.951049	0.769231	0.864553	0.82063
16960	1	0.642857	0.785714	1	0.796875	0.951049	0.615385	0.861671	0.815788
16970	1	0.642857	0.857143	0.875	0.765625	0.965035	0.692308	0.861671	0.816621
16980	1	0.660714	0.785714	0.8125	0.78125	0.937063	0.769231	0.853026	0.803412
16990	0.97561	0.660714	0.642857	0.8125	0.78125	0.951049	0.692308	0.847262	0.795512
17000	1	0.642857	0.714286	0.875	0.78125	0.958042	0.692308	0.855908	0.808469
17010	1	0.571429	0.857143	0.75	0.8125	0.951049	0.692308	0.847262	0.796705
17020	1	0.589286	0.857143	0.875	0.796875	0.958042	0.846154	0.861671	0.817286
17030	1	0.642857	0.785714	0.8125	0.78125	0.972028	0.769231	0.864553	0.820935
17040	1	0.607143	0.928571	0.875	0.78125	0.972028	0.692308	0.864553	0.821837
17050	1	0.607143	0.714286	0.875	0.78125	0.965035	0.692308	0.853026	0.80515
17060	1	0.642857	0.857143	0.8125	0.796875	0.965035	0.692308	0.864553	0.821297
17070	0.97561	0.607143	0.857143	0.875	0.78125	0.958042	0.692308	0.853026	0.805275
17080	1	0.642857	0.642857	0.9375	0.78125	0.958042	0.615385	0.853026	0.803974
17090	1	0.642857	0.857143	0.9375	0.8125	0.965035	0.615385	0.870317	0.827958
17100	1	0.642857	0.857143	0.8125	0.75	0.965035	0.615385	0.853026	0.804833
17110	1	0.607143	0.857143	1	0.796875	0.937063	0.615385	0.853026	0.803964
17120	1	0.625	0.714286	0.75	0.796875	0.972028	0.538462	0.850144	0.800452
17130	1	0.678571	0.857143	0.875	0.796875	0.958042	0.769231	0.873199	0.831127
17140	1	0.607143	0.928571	0.875	0.78125	0.958042	0.692308	0.85879	0.813091
17150	1	0.589286	0.785714	0.9375	0.796875	0.951049	0.692308	0.853026	0.804617
17160	1	0.625	0.785714	0.8125	0.796875	0.965035	0.692308	0.85879	0.812546
17170	1	0.607143	0.714286	0.8125	0.78125	0.965035	0.615385	0.847262	0.79696
17180	1	0.678571	0.571429	0.8125	0.78125	0.958042	0.615385	0.850144	0.799389
17190	1	0.678571	0.857143	0.875	0.78125	0.958042	0.692308	0.867435	0.823579
17200	1	0.660714	0.714286	0.875	0.84375	0.944056	0.769231	0.867435	0.822805
17210	1	0.642857	0.714286	0.9375	0.8125	0.944056	0.769231	0.861671	0.815192
17220	1	0.678571	0.857143	0.8125	0.8125	0.944056	0.692308	0.864553	0.818964
17230	1	0.607143	0.857143	0.8125	0.78125	0.958042	0.769231	0.855908	0.808858
17240	0.97561	0.660714	0.785714	0.9375	0.8125	0.965035	0.692308	0.870317	0.827941
17250	1	0.625	0.785714	0.8125	0.78125	0.965035	0.615385	0.853026	0.805022
17260	1	0.589286	0.928571	0.8125	0.78125	0.951049	0.769231	0.853026	0.804925
17270	1	0.571429	0.785714	0.9375	0.78125	0.958042	0.615385	0.847262	0.797243
17280	1	0.625	0.857143	0.875	0.78125	0.965035	0.769231	0.864553	0.821128
17290	1	0.607143	0.785714	0.8125	0.75	0.944056	0.769231	0.841499	0.788785
17300	1	0.678571	0.785714	0.875	0.796875	0.965035	0.615385	0.867435	0.823452
17310	1	0.642857	0.642857	0.8125	0.8125	0.965035	0.538462	0.853026	0.80377
17320	1	0.642857	0.785714	0.9375	0.765625	0.958042	0.769231	0.861671	0.81652
17330	1	0.625	0.857143	0.8125	0.765625	0.951049	0.769231	0.853026	0.804516
17340	0.97561	0.571429	0.857143	0.6875	0.78125	0.965035	0.692308	0.841499	0.790164
17350	1	0.553571	0.857143	0.8125	0.796875	0.951049	0.615385	0.841499	0.789305
17360	1	0.625	0.642857	0.875	0.78125	0.958042	0.692308	0.850144	0.800275
17370	0.97561	0.625	0.785714	0.8125	0.796875	0.944056	0.692308	0.847262	0.795764
17380	1	0.589286	0.857143	0.8125	0.765625	0.951049	0.769231	0.847262	0.797341
17390	1	0.642857	0.785714	0.875	0.8125	0.972028	0.769231	0.873199	0.832088
17400	1	0.571429	0.857143	1	0.765625	0.93007	0.615385	0.838617	0.78483
17410	1	0.642857	0.785714	0.75	0.828125	0.958042	0.692308	0.861671	0.81547
17420	1	0.660714	0.857143	0.875	0.796875	0.951049	0.769231	0.867435	0.823398
17430	1	0.642857	0.714286	0.8125	0.796875	0.937063	0.692308	0.847262	0.795475
17440	1	0.642857	0.714286	0.9375	0.78125	0.958042	0.692308	0.85879	0.812135
17450	1	0.589286	0.857143	1	0.796875	0.965035	0.538462	0.85879	0.813224
17460	1	0.642857	0.928571	0.8125	0.8125	0.965035	0.692308	0.870317	0.828266
17470	1	0.607143	0.785714	0.875	0.8125	0.958042	0.769231	0.861671	0.816469
17480	1	0.589286	0.785714	0.75	0.796875	0.958042	0.692308	0.847262	0.79708
17490	1	0.571429	0.785714	0.875	0.75	0.965035	0.538462	0.838617	0.785856
17500	1	0.625	0.785714	0.8125	0.78125	0.951049	0.615385	0.847262	0.796378
17510	1	0.589286	0.785714	0.8125	0.796875	0.958042	0.615385	0.847262	0.796473
17520	1	0.553571	0.785714	0.875	0.765625	0.958042	0.692308	0.841499	0.789296
17530	1	0.642857	0.857143	0.75	0.765625	0.958042	0.615385	0.850144	0.800739
17540	1	0.589286	0.785714	0.8125	0.796875	0.958042	0.615385	0.847262	0.796844
17550	1	0.642857	0.857143	0.8125	0.78125	0.951049	0.692308	0.855908	0.807782
17560	1	0.625	0.857143	0.9375	0.796875	0.965035	0.769231	0.870317	0.828382
17570	1	0.660714	0.785714	0.9375	0.828125	0.951049	0.692308	0.870317	0.82737
17580	1	0.571429	0.714286	0.8125	0.78125	0.958042	0.692308	0.841499	0.789148
17590	1	0.678571	0.928571	0.9375	0.78125	0.965035	0.615385	0.873199	0.832026
17600	1	0.642857	0.857143	0.75	0.796875	0.951049	0.769231	0.85879	0.811977
17610	1	0.607143	0.714286	0.875	0.78125	0.965035	0.615385	0.850144	0.800545
17620	1	0.642857	0.857143	0.9375	0.796875	0.958042	0.692308	0.867435	0.823902
17630	1	0.625	0.928571	0.875	0.796875	0.951049	0.692308	0.861671	0.816191
17640	1	0.642857	0.857143	0.8125	0.8125	0.958042	0.692308	0.864553	0.819746
17650	1	0.625	0.785714	0.6875	0.8125	0.965035	0.461538	0.847262	0.795937
17660	0.97561	0.625	0.857143	0.9375	0.8125	0.972028	0.692308	0.870317	0.828773
17670	1	0.625	0.785714	0.9375	0.796875	0.944056	0.769231	0.85879	0.811972
17680	1	0.625	0.785714	0.8125	0.8125	0.965035	0.769231	0.864553	0.819727
17690	1	0.589286	0.857143	0.9375	0.8125	0.965035	0.615385	0.861671	0.817109
17700	1	0.660714	0.857143	0.9375	0.8125	0.965035	0.615385	0.873199	0.831778
17710	1	0.625	0.928571	0.75	0.765625	0.951049	0.692308	0.850144	0.801085
17720	1	0.607143	0.785714	0.75	0.796875	0.986014	0.538462	0.855908	0.810079
17730	1	0.642857	0.857143	0.75	0.75	0.958042	0.692308	0.850144	0.801138
17740	1	0.642857	0.857143	0.875	0.8125	0.965035	0.769231	0.873199	0.832283
17750	1	0.625	0.714286	0.75	0.78125	0.965035	0.692308	0.850144	0.800456
17760	1	0.696429	0.714286	0.9375	0.78125	0.951049	0.692308	0.864553	0.819556
17770	1	0.625	0.714286	0.8125	0.796875	0.972028	0.615385	0.855908	0.808967
17780	1	0.642857	0.857143	0.75	0.78125	0.958042	0.769231	0.85879	0.812191
17790	1	0.642857	0.785714	0.8125	0.78125	0.951049	0.692308	0.853026	0.803786
17800	1	0.660714	0.857143	0.75	0.78125	0.951049	0.538462	0.850144	0.800184
17810	1	0.607143	0.785714	0.75	0.75	0.951049	0.615385	0.835735	0.780786
17820	1	0.571429	0.857143	0.75	0.796875	0.979021	0.692308	0.855908	0.810972
17830	1	0.696429	0.714286	0.75	0.78125	0.965035	0.384615	0.850144	0.799251
17840	1	0.642857	0.785714	0.75	0.78125	0.965035	0.769231	0.85879	0.812641
17850	1	0.625	0.857143	0.875	0.765625	0.958042	0.769231	0.85879	0.812836
17860	1	0.625	0.785714	0.75	0.765625	0.979021	0.538462	0.850144	0.802105
17870	1	0.589286	0.714286	0.75	0.78125	0.951049	0.692308	0.838617	0.784328
17880	1	0.642857	0.785714	0.75	0.78125	0.958042	0.615385	0.850144	0.80002
17890	1	0.642857	0.714286	0.9375	0.8125	0.93007	0.692308	0.853026	0.803133
17900	1	0.589286	0.785714	1	0.8125	0.951049	0.615385	0.855908	0.808702
17910	1	0.589286	0.714286	0.8125	0.78125	0.958042	0.692308	0.84438	0.793386
17920	1	0.642857	0.857143	0.9375	0.828125	0.944056	0.692308	0.867435	0.823269
17930	1	0.642857	0.785714	1	0.8125	0.958042	0.615385	0.867435	0.82376
17940	0.97561	0.642857	0.857143	0.75	0.765625	0.965035	0.538462	0.847262	0.79727
17950	1	0.642857	0.857143	0.9375	0.796875	0.923077	0.692308	0.853026	0.803153
17960	1	0.696429	0.785714	0.875	0.765625	0.951049	0.692308	0.861671	0.814984
17970	1	0.660714	0.714286	0.9375	0.796875	0.951049	0.692308	0.861671	0.815413
17980	1	0.642857	0.857143	0.9375	0.75	0.951049	0.692308	0.855908	0.808406
17990	1	0.678571	0.857143	0.875	0.796875	0.958042	0.692308	0.870317	0.827198
18000	1	0.607143	0.714286	0.8125	0.78125	0.951049	0.769231	0.847262	0.796507
18010	1	0.607143	0.857143	0.8125	0.765625	0.958042	0.692308	0.850144	0.801026
18020	1	0.607143	0.857143	0.8125	0.765625	0.944056	0.615385	0.841499	0.788779
18030	1	0.589286	0.714286	0.875	0.78125	0.944056	0.538462	0.835735	0.780052
18040	1	0.607143	0.857143	0.9375	0.796875	0.951049	0.846154	0.864553	0.820361
18050	1	0.607143	0.785714	0.75	0.796875	0.951049	0.615385	0.84438	0.791928
18060	1	0.571429	0.857143	0.875	0.796875	0.979021	0.615385	0.85879	0.814559
18070	1	0.625	0.785714	0.875	0.765625	0.965035	0.769231	0.85879	0.813196
18080	1	0.625	0.857143	0.875	0.796875	0.965035	0.769231	0.867435	0.824825
18090	1	0.696429	0.857143	0.75	0.734375	0.944056	0.692308	0.850144	0.800098
18100	1	0.589286	0.785714	0.8125	0.765625	0.972028	0.692308	0.850144	0.801857
18110	0.97561	0.625	0.857143	0.625	0.796875	0.951049	0.615385	0.841499	0.788431
18120	1	0.589286	0.928571	1	0.765625	0.951049	0.692308	0.855908	0.809381
18130	0.97561	0.625	0.785714	0.9375	0.796875	0.951049	0.769231	0.85879	0.812344
18140	1	0.625	0.714286	0.875	0.78125	0.958042	0.769231	0.855908	0.808573
18150	1	0.625	0.714286	0.75	0.8125	0.965035	0.846154	0.861671	0.816025
18160	1	0.589286	0.785714	0.875	0.765625	0.965035	0.615385	0.847262	0.797133
18170	1	0.607143	0.785714	0.9375	0.78125	0.965035	0.538462	0.853026	0.804955
18180	1	0.642857	0.928571	0.6875	0.765625	0.958042	0.692308	0.853026	0.804788
18190	1	0.642857	0.714286	0.875	0.765625	0.944056	0.615385	0.84438	0.791989
18200	1	0.642857	0.571429	0.8125	0.78125	0.972028	0.846154	0.85879	0.812647
18210	1	0.642857	0.928571	0.875	0.78125	0.958042	0.692308	0.864553	0.820421
18220	1	0.660714	0.857143	0.9375	0.765625	0.965035	0.692308	0.867435	0.824657
18230	1	0.571429	0.714286	0.75	0.78125	0.972028	0.769231	0.847262	0.79782
18240	1	0.625	0.857143	0.8125	0.796875	0.951049	0.692308	0.855908	0.808481
18250	1	0.642857	0.785714	0.5625	0.796875	0.958042	0.769231	0.850144	0.800346
18260	1	0.642857	1	0.6875	0.78125	0.951049	0.615385	0.853026	0.804504
18270	1	0.660714	0.928571	0.875	0.765625	0.958042	0.692308	0.864553	0.820279
18280	0.97561	0.571429	0.857143	0.9375	0.734375	0.951049	0.692308	0.838617	0.786067
18290	1	0.589286	0.857143	0.875	0.78125	0.972028	0.692308	0.85879	0.813875
18300	1	0.625	0.857143	0.75	0.71875	0.93007	0.615385	0.827089	0.768752
18310	1	0.607143	0.857143	0.9375	0.765625	0.965035	0.538462	0.853026	0.805884
18320	1	0.625	0.785714	0.75	0.78125	0.944056	0.615385	0.841499	0.788067
18330	1	0.625	0.857143	0.875	0.796875	0.951049	0.769231	0.861671	0.816372
18340	1	0.642857	0.642857	0.8125	0.78125	0.972028	0.692308	0.855908	0.808786
18350	1	0.625	0.714286	0.6875	0.8125	0.958042	0.615385	0.847262	0.796393
18360	1	0.625	0.714286	0.75	0.78125	0.958042	0.769231	0.850144	0.800212
18370	1	0.607143	0.642857	0.875	0.765625	0.951049	0.769231	0.84438	0.792495
18380	0.97561	0.642857	0.857143	0.8125	0.765625	0.958042	0.692308	0.853026	0.804392
18390	1	0.625	0.785714	0.8125	0.8125	0.951049	0.692308	0.855908	0.808043
18400	1	0.660714	0.714286	0.8125	0.765625	0.944056	0.692308	0.847262	0.795978
18410	1	0.642857	0.714286	0.8125	0.78125	0.958042	0.846154	0.85879	0.812506
18420	1	0.589286	0.785714	0.9375	0.796875	0.958042	0.692308	0.855908	0.808715
18430	1	0.589286	0.785714	0.875	0.78125	0.951049	0.538462	0.841499	0.788565
18440	1	0.625	0.857143	0.6875	0.765625	0.965035	0.615385	0.847262	0.797146
18450	0.97561	0.589286	0.857143	0.9375	0.8125	0.937063	0.769231	0.853026	0.803892
18460	1	0.660714	0.928571	0.875	0.796875	0.965035	0.692308	0.873199	0.831971
18470	1	0.607143	0.785714	0.625	0.78125	0.951049	0.692308	0.838617	0.784682
18480	1	0.642857	0.714286	0.875	0.765625	0.951049	0.692308	0.850144	0.800718
18490	1	0.625	0.857143	0.6875	0.78125	0.958042	0.692308	0.850144	0.800805
18500	1	0.678571	0.857143	0.6875	0.734375	0.951049	0.538462	0.841499	0.788515
18510	1	0.589286	0.928571	0.8125	0.75	0.965035	0.692308	0.850144	0.802837
18520	1	0.607143	0.928571	0.8125	0.8125	0.951049	0.769231	0.861671	0.816714
18530	1	0.660714	0.857143	0.8125	0.78125	0.965035	0.615385	0.861671	0.816407
18540	1	0.625	0.785714	0.9375	0.828125	0.958042	0.769231	0.870317	0.828115
18550	1	0.678571	0.714286	0.8125	0.75	0.965035	0.692308	0.855908	0.807768
18560	1	0.625	0.714286	0.875	0.78125	0.951049	0.769231	0.853026	0.804046
18570	1	0.607143	0.785714	0.6875	0.765625	0.972028	0.615385	0.84438	0.793461
18580	1	0.625	0.857143	0.9375	0.8125	0.965035	0.615385	0.867435	0.824317
18590	1	0.678571	0.857143	0.875	0.796875	0.951049	0.692308	0.867435	0.823573
18600	1	0.625	0.714286	0.9375	0.8125	0.965035	0.615385	0.861671	0.816371
18610	1	0.589286	0.785714	0.8125	0.78125	0.972028	0.692308	0.853026	0.805936
18620	1	0.642857	0.928571	0.875	0.796875	0.958042	0.615385	0.864553	0.820377
18630	1	0.589286	0.785714	0.8125	0.765625	0.979021	0.692308	0.853026	0.806307
18640	1	0.589286	0.928571	0.75	0.765625	0.951049	0.692308	0.84438	0.792892
18650	1	0.625	0.714286	0.875	0.828125	0.965035	0.769231	0.867435	0.824463
18660	1	0.642857	0.857143	0.875	0.8125	0.944056	0.692308	0.861671	0.815443
18670	1	0.607143	0.571429	0.75	0.78125	0.958042	0.538462	0.832853	0.77651
18680	1	0.571429	0.857143	0.875	0.78125	0.972028	0.769231	0.85879	0.814619
18690	1	0.607143	0.714286	0.875	0.78125	0.937063	0.692308	0.841499	0.788147
18700	1	0.642857	0.857143	0.75	0.8125	0.965035	0.615385	0.861671	0.81625
18710	1	0.589286	0.857143	0.875	0.8125	0.965035	0.538462	0.855908	0.809167
18720	1	0.517857	0.785714	0.875	0.828125	0.979021	0.615385	0.853026	0.806469
18730	0.97561	0.589286	0.785714	0.875	0.765625	0.958042	0.769231	0.847262	0.797476
18740	1	0.625	0.714286	0.9375	0.8125	0.944056	0.692308	0.855908	0.807592
18750	1	0.607143	0.785714	0.8125	0.765625	0.958042	0.692308	0.847262	0.797037
18760	1	0.571429	0.785714	0.8125	0.796875	0.965035	0.615385	0.847262	0.797677
18770	1	0.571429	0.785714	0.875	0.78125	0.958042	0.615385	0.84438	0.793739
18780	1	0.625	0.642857	0.9375	0.796875	0.965035	0.615385	0.855908	0.808737
18790	1	0.642857	0.785714	0.9375	0.8125	0.965035	0.769231	0.873199	0.832014
18800	1	0.589286	0.857143	0.875	0.765625	0.972028	0.538462	0.850144	0.802303
18810	1	0.607143	0.785714	0.9375	0.78125	0.958042	0.615385	0.853026	0.80476
18820	1	0.625	0.714286	1	0.796875	0.944056	0.692308	0.855908	0.807755
18830	1	0.642857	0.857143	0.875	0.796875	0.958042	0.769231	0.867435	0.824191
18840	1	0.642857	0.785714	0.8125	0.71875	0.951049	0.538462	0.835735	0.780211
18850	1	0.696429	0.714286	0.8125	0.828125	0.958042	0.615385	0.867435	0.822946
18860	1	0.678571	0.785714	0.8125	0.75	0.937063	0.692308	0.847262	0.795525
18870	1	0.642857	0.928571	0.9375	0.78125	0.958042	0.615385	0.864553	0.820536
18880	1	0.625	0.785714	0.9375	0.78125	0.972028	0.769231	0.867435	0.825226
18890	1	0.625	0.785714	0.875	0.78125	0.965035	0.692308	0.85879	0.812713
18900	1	0.660714	0.857143	0.9375	0.796875	0.937063	0.615385	0.85879	0.811044
18910	1	0.571429	0.642857	0.75	0.796875	0.944056	0.615385	0.829971	0.772063
18920	1	0.589286	0.857143	0.75	0.796875	0.972028	0.615385	0.853026	0.805779
18930	1	0.607143	0.642857	0.9375	0.765625	0.965035	0.692308	0.850144	0.801389
18940	1	0.678571	0.857143	0.75	0.78125	0.951049	0.692308	0.85879	0.811273
18950	1	0.625	0.785714	0.875	0.78125	0.965035	0.692308	0.85879	0.813646
18960	1	0.660714	0.714286	0.75	0.796875	0.944056	0.769231	0.853026	0.803582
18970	1	0.607143	0.857143	0.875	0.765625	0.944056	0.692308	0.847262	0.797112
18980	1	0.696429	0.928571	0.6875	0.796875	0.951049	0.692308	0.864553	0.819322
18990	1	0.642857	0.857143	0.75	0.78125	0.944056	0.615385	0.847262	0.796399
19000	1	0.607143	0.857143	0.875	0.71875	0.958042	0.769231	0.847262	0.79801
19010	1	0.625	0.785714	0.8125	0.8125	0.944056	0.692308	0.853026	0.803736
19020	1	0.642857	0.714286	0.75	0.78125	0.958042	0.538462	0.84438	0.792308
19030	1	0.642857	0.785714	0.8125	0.78125	0.972028	0.615385	0.85879	0.812343
19040	1	0.589286	0.785714	0.875	0.8125	0.958042	0.846154	0.861671	0.816259
19050	1	0.642857	0.857143	0.9375	0.765625	0.958042	0.769231	0.864553	0.820608
19060	1	0.607143	0.928571	0.9375	0.75	0.951049	0.769231	0.855908	0.809453
19070	1	0.642857	0.785714	0.75	0.75	0.972028	0.615385	0.850144	0.801262
19080	1	0.642857	0.857143	0.8125	0.78125	0.951049	0.692308	0.855908	0.807586
19090	1	0.625	0.714286	0.6875	0.765625	0.958042	0.461538	0.832853	0.776657
19100	1	0.607143	0.714286	0.6875	0.8125	0.951049	0.692308	0.84438	0.792292
19110	0.97561	0.642857	0.642857	0.875	0.78125	0.944056	0.461538	0.835735	0.77988
19120	1	0.589286	0.642857	0.875	0.765625	0.965035	0.769231	0.847262	0.797561
19130	1	0.642857	0.642857	0.8125	0.796875	0.958042	0.692308	0.853026	0.804457
19140	1	0.589286	0.714286	0.875	0.796875	0.944056	0.615385	0.841499	0.788355
19150	1	0.625	0.857143	0.75	0.796875	0.972028	0.692308	0.861671	0.817513
19160	1	0.535714	0.857143	0.6875	0.796875	0.965035	0.615385	0.838617	0.787117
19170	1	0.642857	0.785714	0.8125	0.734375	0.965035	0.384615	0.838617	0.784976
19180	1	0.589286	0.785714	0.875	0.765625	0.958042	0.769231	0.850144	0.801418
19190	1	0.625	0.785714	0.875	0.75	0.972028	0.615385	0.853026	0.805727
19200	1	0.660714	0.857143	0.8125	0.8125	0.965035	0.846154	0.876081	0.835941
19210	1	0.571429	0.714286	0.875	0.796875	0.979021	0.538462	0.850144	0.802148
19220	1	0.589286	0.857143	0.625	0.765625	0.958042	0.615385	0.835735	0.781843
19230	1	0.589286	0.714286	1	0.78125	0.972028	0.615385	0.855908	0.809738
19240	1	0.625	0.785714	0.8125	0.78125	0.951049	0.769231	0.853026	0.804254
19250	1	0.642857	0.714286	0.875	0.765625	0.965035	0.769231	0.85879	0.812252
19260	1	0.589286	0.785714	0.8125	0.765625	0.965035	0.692308	0.847262	0.797532
19270	1	0.571429	0.857143	0.6875	0.796875	0.951049	0.538462	0.835735	0.78084
19280	1	0.607143	0.857143	0.875	0.765625	0.937063	0.538462	0.838617	0.784231
19290	1	0.660714	0.785714	0.8125	0.796875	0.944056	0.846154	0.861671	0.815181
19300	1	0.642857	0.785714	0.9375	0.796875	0.972028	0.692308	0.870317	0.828674
19310	1	0.571429	0.785714	0.8125	0.75	0.965035	0.769231	0.84438	0.794609
19320	1	0.625	0.785714	0.8125	0.796875	0.972028	0.769231	0.864553	0.820937
19330	1	0.607143	0.714286	0.8125	0.78125	0.944056	0.615385	0.838617	0.78441
19340	1	0.642857	0.785714	0.625	0.765625	0.937063	0.615385	0.832853	0.776013
19350	1	0.625	0.714286	0.8125	0.78125	0.951049	0.615385	0.84438	0.792485
19360	0.97561	0.660714	0.785714	0.6875	0.78125	0.937063	0.769231	0.84438	0.791795
19370	1	0.625	0.785714	0.8125	0.75	0.958042	0.769231	0.850144	0.801162
19380	1	0.625	0.857143	0.8125	0.796875	0.965035	0.615385	0.85879	0.812401
19390	1	0.625	0.857143	0.75	0.796875	0.958042	0.615385	0.853026	0.804646
19400	1	0.589286	0.714286	0.6875	0.78125	0.979021	0.538462	0.841499	0.790063
19410	1	0.660714	0.857143	0.75	0.796875	0.951049	0.692308	0.85879	0.811642
19420	1	0.589286	0.928571	0.8125	0.78125	0.958042	0.692308	0.853026	0.806029
19430	1	0.625	0.857143	0.8125	0.796875	0.965035	0.538462	0.855908	0.808833
19440	1	0.660714	0.928571	0.9375	0.78125	0.958042	0.538462	0.864553	0.820162
19450	1	0.607143	0.714286	0.6875	0.78125	0.944056	0.692308	0.835735	0.780413
19460	1	0.589286	0.714286	0.875	0.765625	0.958042	0.769231	0.847262	0.797112
19470	1	0.642857	0.857143	0.9375	0.75	0.972028	0.615385	0.861671	0.817324
19480	1	0.607143	0.714286	0.8125	0.796875	0.958042	0.538462	0.84438	0.792525
19490	1	0.625	0.785714	0.75	0.765625	0.944056	0.769231	0.84438	0.792555
19500	1	0.589286	0.928571	0.875	0.78125	0.958042	0.692308	0.855908	0.808945
19510	1	0.625	0.785714	0.75	0.765625	0.965035	0.769231	0.853026	0.804917
19520	1	0.642857	0.928571	0.8125	0.75	0.944056	0.692308	0.850144	0.800826
19530	1	0.607143	0.785714	0.8125	0.78125	0.965035	0.769231	0.855908	0.80932
19540	0.97561	0.625	0.785714	0.75	0.796875	0.965035	0.692308	0.853026	0.804434
19550	1	0.571429	0.785714	0.875	0.796875	0.951049	0.538462	0.841499	0.788818
19560	1	0.607143	0.785714	0.875	0.765625	0.951049	0.615385	0.84438	0.792788
19570	0.97561	0.625	0.714286	0.75	0.796875	0.944056	0.615385	0.838617	0.783619
19580	1	0.625	0.928571	0.875	0.8125	0.951049	0.692308	0.864553	0.819818
19590	0.97561	0.589286	0.857143	0.8125	0.796875	0.965035	0.769231	0.855908	0.809552
19600	1	0.642857	0.785714	0.875	0.765625	0.951049	0.769231	0.855908	0.808079
19610	1	0.589286	0.785714	0.8125	0.8125	0.958042	0.615385	0.850144	0.800539
19620	1	0.642857	0.857143	0.6875	0.8125	0.965035	0.615385	0.85879	0.812164
19630	1	0.642857	0.785714	0.875	0.796875	0.958042	0.692308	0.861671	0.816203
19640	1	0.589286	0.714286	0.5625	0.78125	0.958042	0.769231	0.835735	0.78145
19650	0.97561	0.607143	0.642857	1	0.796875	0.979021	0.692308	0.861671	0.817492
19660	1	0.625	0.785714	0.9375	0.796875	0.965035	0.538462	0.85879	0.812433
19670	1	0.571429	0.785714	0.875	0.796875	0.951049	0.615385	0.84438	0.792903
19680	1	0.642857	0.642857	0.8125	0.796875	0.951049	0.692308	0.850144	0.79999
19690	1	0.625	0.642857	0.875	0.78125	0.951049	0.692308	0.847262	0.796291
19700	1	0.625	0.785714	0.6875	0.75	0.944056	0.692308	0.835735	0.780684
19710	0.97561	0.625	0.785714	0.8125	0.765625	0.965035	0.615385	0.847262	0.797103
19720	1	0.660714	0.714286	0.9375	0.78125	0.951049	0.692308	0.85879	0.811804
19730	1	0.607143	0.785714	0.75	0.796875	0.965035	0.692308	0.853026	0.804797
19740	1	0.660714	0.857143	0.875	0.796875	0.944056	0.692308	0.861671	0.81557
19750	1	0.571429	0.642857	0.9375	0.78125	0.958042	0.615385	0.841499	0.789113
19760	1	0.625	0.857143	0.75	0.796875	0.937063	0.692308	0.847262	0.795649
19770	1	0.642857	0.785714	0.875	0.78125	0.965035	0.692308	0.861671	0.816251
19780	1	0.642857	0.857143	0.875	0.8125	0.958042	0.692308	0.867435	0.823755
19790	1	0.642857	0.785714	0.875	0.8125	0.958042	0.769231	0.867435	0.823925
19800	1	0.553571	0.714286	0.8125	0.796875	0.951049	0.615385	0.835735	0.781297
19810	1	0.625	0.857143	0.8125	0.78125	0.958042	0.769231	0.85879	0.812389
19820	1	0.696429	0.928571	0.8125	0.75	0.965035	0.615385	0.864553	0.820793
19830	1	0.589286	0.857143	0.8125	0.765625	0.944056	0.769231	0.84438	0.793326
19840	1	0.678571	0.714286	0.6875	0.8125	0.965035	0.538462	0.855908	0.807725
19850	1	0.642857	0.785714	0.8125	0.796875	0.951049	0.615385	0.853026	0.803602
19860	1	0.660714	0.785714	0.625	0.765625	0.937063	0.615385	0.835735	0.779214
19870	1	0.642857	0.714286	0.8125	0.765625	0.951049	0.769231	0.850144	0.799819
19880	1	0.660714	0.857143	0.75	0.765625	0.972028	0.615385	0.85879	0.812697
19890	1	0.660714	0.857143	0.875	0.8125	0.965035	0.692308	0.873199	0.831944
19900	1	0.625	0.785714	0.9375	0.828125	0.951049	0.769231	0.867435	0.823977
19910	1	0.625	0.785714	0.8125	0.8125	0.958042	0.692308	0.85879	0.812343
19920	1	0.607143	0.714286	0.8125	0.75	0.965035	0.846154	0.850144	0.801585
19930	1	0.678571	0.714286	0.9375	0.796875	0.965035	0.615385	0.867435	0.823375
19940	1	0.589286	0.785714	0.8125	0.765625	0.951049	0.615385	0.838617	0.784601
19950	1	0.553571	0.785714	0.8125	0.75	0.958042	0.692308	0.835735	0.782303
19960	1	0.642857	0.714286	0.9375	0.796875	0.958042	0.692308	0.861671	0.815693
19970	1	0.696429	0.785714	0.875	0.78125	0.965035	0.692308	0.870317	0.827487
19980	1	0.589286	0.785714	0.6875	0.796875	0.958042	0.538462	0.838617	0.785244
19990	1	0.607143	0.785714	0.75	0.796875	0.937063	0.538462	0.835735	0.780031
[truncated: 2,239 more rows]

## Sheet: Support vector machine
Number of features	G34	MES	MID	MYCN	RTK	RTK II	RTK III	Overall accuracy	MCC
10	1	0	0	1	0	0.993007	0	0.573487	0.441443
20	1	0.017857	0.071429	1	0.078125	0.951049	0	0.576369	0.434242
30	1	0.125	1	0.875	0.765625	0.923077	0.076923	0.743516	0.660187
40	1	0.232143	0.928571	0.9375	0.796875	0.909091	0.384615	0.772334	0.697587
50	1	0.267857	1	0.875	0.828125	0.937063	0.461538	0.798271	0.734331
60	1	0.321429	1	0.875	0.84375	0.909091	0.692308	0.806916	0.74302
70	1	0.357143	1	0.875	0.859375	0.888112	0.692308	0.806916	0.741797
80	1	0.267857	1	0.875	0.859375	0.881119	0.692308	0.789625	0.719208
90	1	0.339286	1	0.8125	0.859375	0.853147	0.692308	0.786744	0.713737
100	1	0.446429	1	0.8125	0.875	0.853147	0.692308	0.806916	0.740945
110	1	0.517857	1	0.9375	0.875	0.867133	0.692308	0.829971	0.772169
120	1	0.767857	1	0.9375	0.875	0.909091	0.846154	0.893372	0.857501
130	1	0.785714	1	0.9375	0.859375	0.909091	0.846154	0.893372	0.857559
140	1	0.75	1	0.9375	0.828125	0.916084	0.846154	0.884726	0.845925
150	1	0.767857	1	1	0.890625	0.888112	0.846154	0.89049	0.854026
160	1	0.75	1	1	0.875	0.888112	0.846154	0.884726	0.846102
170	1	0.767857	1	1	0.875	0.867133	0.846154	0.878963	0.838803
180	1	0.767857	1	1	0.90625	0.867133	0.846154	0.884726	0.846549
190	1	0.803571	1	0.9375	0.859375	0.895105	0.769231	0.887608	0.849954
200	1	0.803571	1	0.9375	0.875	0.881119	0.846154	0.887608	0.85026
210	1	0.785714	1	0.9375	0.859375	0.881119	0.846154	0.881844	0.842348
220	1	0.767857	1	0.9375	0.875	0.874126	0.846154	0.878963	0.838739
230	1	0.767857	1	0.9375	0.84375	0.888112	0.846154	0.878963	0.838321
240	1	0.767857	1	0.9375	0.84375	0.895105	0.769231	0.878963	0.838167
250	1	0.785714	1	0.9375	0.875	0.888112	0.769231	0.884726	0.846079
260	1	0.767857	1	0.9375	0.875	0.902098	0.846154	0.89049	0.853647
270	1	0.767857	1	0.9375	0.875	0.902098	0.846154	0.89049	0.85361
280	1	0.75	1	0.9375	0.875	0.902098	0.846154	0.887608	0.84972
290	1	0.785714	1	0.9375	0.875	0.944056	0.846154	0.910663	0.880876
300	1	0.821429	1	0.9375	0.890625	0.923077	0.846154	0.910663	0.88067
310	1	0.821429	1	1	0.875	0.923077	0.846154	0.910663	0.880685
320	1	0.821429	1	1	0.859375	0.944056	0.846154	0.916427	0.888561
330	1	0.821429	1	1	0.921875	0.951049	0.846154	0.930836	0.907765
340	1	0.821429	1	1	0.9375	0.93007	0.846154	0.925072	0.900012
350	1	0.821429	1	1	0.9375	0.937063	0.846154	0.927954	0.903858
360	1	0.821429	1	1	0.9375	0.923077	0.846154	0.92219	0.896198
370	1	0.803571	1	1	0.9375	0.923077	0.846154	0.919308	0.892308
380	1	0.821429	1	1	0.9375	0.909091	0.846154	0.916427	0.888653
390	1	0.821429	1	1	0.9375	0.909091	0.846154	0.916427	0.888653
400	1	0.857143	1	1	0.9375	0.93007	0.846154	0.930836	0.907791
410	1	0.875	1	1	0.9375	0.916084	0.846154	0.927954	0.904222
420	1	0.839286	1	1	0.9375	0.902098	0.846154	0.916427	0.888857
430	1	0.821429	1	1	0.9375	0.895105	0.846154	0.910663	0.881219
440	1	0.821429	1	1	0.9375	0.909091	0.846154	0.916427	0.888653
450	1	0.839286	1	1	0.9375	0.909091	0.846154	0.919308	0.892597
460	1	0.821429	1	1	0.921875	0.909091	0.846154	0.913545	0.884842
470	1	0.821429	1	1	0.921875	0.916084	0.846154	0.916427	0.888586
480	1	0.821429	1	1	0.921875	0.902098	0.846154	0.910663	0.881085
490	1	0.857143	1	1	0.90625	0.937063	0.846154	0.927954	0.903865
500	1	0.839286	1	1	0.90625	0.944056	0.846154	0.927954	0.903847
510	1	0.839286	1	1	0.90625	0.923077	0.846154	0.919308	0.892388
520	1	0.875	1	1	0.921875	0.93007	0.846154	0.930836	0.907887
530	1	0.857143	1	1	0.90625	0.944056	0.846154	0.930836	0.907807
540	1	0.839286	1	1	0.921875	0.944056	0.846154	0.930836	0.907703
550	1	0.821429	1	1	0.921875	0.937063	0.846154	0.925072	0.89999
560	1	0.839286	1	1	0.921875	0.937063	0.846154	0.927954	0.903865
570	1	0.857143	1	1	0.9375	0.937063	0.846154	0.933718	0.911594
580	1	0.839286	1	1	0.9375	0.937063	0.846154	0.930836	0.907719
590	1	0.839286	1	1	0.9375	0.944056	0.846154	0.933718	0.911572
600	1	0.821429	1	1	0.9375	0.944056	0.846154	0.930836	0.907732
610	1	0.839286	1	1	0.9375	0.937063	0.846154	0.930836	0.907719
620	1	0.839286	1	1	0.9375	0.93007	0.846154	0.927954	0.903908
630	1	0.857143	1	1	0.9375	0.937063	0.846154	0.933718	0.911606
640	1	0.839286	1	1	0.9375	0.937063	0.846154	0.930836	0.907742
650	1	0.857143	1	1	0.9375	0.93007	0.846154	0.930836	0.907793
660	1	0.839286	1	1	0.9375	0.937063	0.846154	0.930836	0.907742
670	1	0.839286	1	1	0.9375	0.944056	0.846154	0.933718	0.911605
680	1	0.875	1	1	0.9375	0.93007	0.846154	0.933718	0.911704
690	1	0.875	1	1	0.9375	0.93007	0.846154	0.933718	0.911692
700	1	0.875	1	1	0.9375	0.937063	0.846154	0.936599	0.915484
710	1	0.857143	1	1	0.921875	0.937063	0.846154	0.930836	0.907719
720	1	0.839286	1	1	0.921875	0.93007	0.846154	0.925072	0.900035
730	1	0.857143	1	1	0.9375	0.937063	0.846154	0.933718	0.911606
740	1	0.857143	1	1	0.9375	0.93007	0.923077	0.933718	0.911621
750	1	0.839286	1	1	0.9375	0.937063	0.846154	0.930836	0.907742
760	1	0.857143	1	1	0.9375	0.937063	0.923077	0.936599	0.915438
770	1	0.821429	1	1	0.9375	0.937063	0.923077	0.930836	0.907731
780	1	0.821429	1	1	0.921875	0.944056	0.846154	0.927954	0.903906
790	1	0.839286	1	1	0.921875	0.951049	0.846154	0.933718	0.911636
800	1	0.839286	1	1	0.921875	0.951049	0.923077	0.936599	0.915484
810	1	0.839286	1	1	0.921875	0.951049	0.923077	0.936599	0.915484
820	1	0.839286	1	1	0.921875	0.958042	0.923077	0.939481	0.919377
830	1	0.839286	1	1	0.921875	0.951049	0.846154	0.933718	0.911636
840	1	0.857143	1	1	0.921875	0.951049	0.846154	0.936599	0.915431
850	1	0.839286	1	1	0.921875	0.958042	0.846154	0.936599	0.915526
860	1	0.857143	1	1	0.921875	0.958042	0.846154	0.939481	0.919332
870	1	0.857143	1	1	0.921875	0.958042	0.846154	0.939481	0.919332
880	1	0.857143	1	1	0.9375	0.958042	0.846154	0.942363	0.923177
890	1	0.857143	1	1	0.9375	0.958042	0.846154	0.942363	0.923177
900	1	0.839286	1	1	0.921875	0.958042	0.846154	0.936599	0.915526
910	1	0.857143	1	1	0.9375	0.951049	0.846154	0.939481	0.919286
920	1	0.839286	1	1	0.921875	0.951049	0.846154	0.933718	0.911603
930	1	0.839286	1	1	0.921875	0.958042	0.846154	0.936599	0.915526
940	1	0.839286	1	1	0.921875	0.958042	0.846154	0.936599	0.915526
950	1	0.839286	1	1	0.9375	0.958042	0.846154	0.939481	0.919367
960	1	0.839286	1	1	0.9375	0.958042	0.846154	0.939481	0.919367
970	1	0.839286	1	1	0.9375	0.972028	0.846154	0.945245	0.927191
980	1	0.839286	1	1	0.9375	0.965035	0.846154	0.942363	0.923264
990	1	0.839286	1	1	0.9375	0.958042	0.846154	0.939481	0.919332
1000	1	0.839286	1	1	0.9375	0.965035	0.846154	0.942363	0.923264
1010	1	0.839286	1	1	0.9375	0.951049	0.846154	0.936599	0.915454
1020	1	0.839286	1	1	0.9375	0.958042	0.846154	0.939481	0.919367
1030	1	0.839286	1	1	0.9375	0.958042	0.846154	0.939481	0.919367
1040	1	0.839286	1	1	0.9375	0.965035	0.846154	0.942363	0.923264
1050	1	0.839286	1	1	0.9375	0.965035	0.846154	0.942363	0.923264
1060	1	0.839286	1	1	0.921875	0.958042	0.846154	0.936599	0.915526
1070	1	0.857143	1	1	0.921875	0.958042	0.846154	0.939481	0.919332
1080	1	0.857143	1	1	0.9375	0.951049	0.846154	0.939481	0.919286
1090	1	0.839286	1	1	0.921875	0.958042	0.846154	0.936599	0.915526
1100	1	0.821429	1	1	0.921875	0.958042	0.846154	0.933718	0.911733
1110	1	0.821429	1	1	0.921875	0.958042	0.846154	0.933718	0.911733
1120	1	0.821429	1	1	0.921875	0.965035	0.846154	0.936599	0.915664
1130	1	0.857143	1	1	0.921875	0.958042	0.846154	0.939481	0.919332
1140	1	0.857143	1	1	0.921875	0.958042	0.846154	0.939481	0.919332
1150	1	0.857143	1	1	0.921875	0.951049	0.846154	0.936599	0.915431
1160	1	0.857143	1	1	0.921875	0.958042	0.846154	0.939481	0.919332
1170	1	0.857143	1	1	0.921875	0.958042	0.846154	0.939481	0.919332
1180	1	0.857143	1	1	0.921875	0.958042	0.846154	0.939481	0.919332
1190	1	0.857143	1	1	0.921875	0.958042	0.846154	0.939481	0.919332
1200	1	0.857143	1	1	0.921875	0.958042	0.846154	0.939481	0.919332
1210	1	0.839286	1	1	0.921875	0.958042	0.846154	0.936599	0.915526
1220	1	0.857143	1	1	0.921875	0.951049	0.846154	0.936599	0.915431
1230	1	0.857143	1	1	0.921875	0.951049	0.846154	0.936599	0.915431
1240	1	0.857143	1	1	0.921875	0.951049	0.846154	0.936599	0.915431
1250	1	0.857143	1	1	0.921875	0.951049	0.846154	0.936599	0.915431
1260	1	0.857143	1	1	0.921875	0.937063	0.846154	0.930836	0.907719
1270	1	0.857143	1	1	0.921875	0.937063	0.846154	0.930836	0.907719
1280	1	0.857143	1	1	0.921875	0.944056	0.846154	0.933718	0.911559
1290	1	0.857143	1	1	0.9375	0.951049	0.846154	0.939481	0.919272
1300	1	0.839286	1	1	0.9375	0.937063	0.846154	0.930836	0.907742
1310	1	0.839286	1	1	0.9375	0.944056	0.846154	0.933718	0.911572
1320	1	0.839286	1	1	0.9375	0.944056	0.846154	0.933718	0.911572
1330	1	0.839286	1	1	0.9375	0.951049	0.846154	0.936599	0.915454
1340	1	0.839286	1	1	0.9375	0.944056	0.846154	0.933718	0.911572
1350	1	0.839286	1	1	0.9375	0.937063	0.846154	0.930836	0.907742
1360	1	0.839286	1	1	0.9375	0.937063	0.846154	0.930836	0.907742
1370	1	0.839286	1	1	0.9375	0.944056	0.846154	0.933718	0.911605
1380	1	0.839286	1	1	0.921875	0.944056	0.846154	0.930836	0.907732
1390	1	0.839286	1	1	0.921875	0.944056	0.846154	0.930836	0.907732
1400	1	0.857143	1	1	0.921875	0.937063	0.846154	0.930836	0.907719
1410	1	0.857143	1	1	0.921875	0.937063	0.846154	0.930836	0.907719
1420	1	0.857143	1	1	0.921875	0.937063	0.846154	0.930836	0.907719
1430	1	0.857143	1	1	0.921875	0.937063	0.846154	0.930836	0.907719
1440	1	0.857143	1	1	0.9375	0.937063	0.846154	0.933718	0.911606
1450	1	0.857143	1	1	0.9375	0.944056	0.846154	0.936599	0.915448
1460	1	0.857143	1	1	0.9375	0.944056	0.846154	0.936599	0.915448
1470	1	0.857143	1	1	0.9375	0.944056	0.846154	0.936599	0.915448
1480	1	0.857143	1	1	0.9375	0.937063	0.846154	0.933718	0.911606
1490	1	0.857143	1	1	0.90625	0.944056	0.846154	0.930836	0.90771
1500	1	0.857143	1	1	0.921875	0.937063	0.846154	0.930836	0.907719
1510	1	0.857143	1	1	0.90625	0.93007	0.846154	0.925072	0.900012
1520	1	0.857143	1	1	0.90625	0.93007	0.846154	0.925072	0.900012
1530	1	0.857143	1	1	0.921875	0.93007	0.846154	0.927954	0.903896
1540	1	0.857143	1	1	0.921875	0.93007	0.846154	0.927954	0.903896
1550	1	0.857143	1	1	0.9375	0.937063	0.846154	0.933718	0.911594
1560	1	0.857143	1	1	0.9375	0.937063	0.846154	0.933718	0.911594
1570	1	0.857143	1	1	0.9375	0.937063	0.846154	0.933718	0.911594
1580	1	0.857143	1	1	0.9375	0.937063	0.846154	0.933718	0.911594
1590	1	0.857143	1	1	0.9375	0.937063	0.846154	0.933718	0.911594
1600	1	0.857143	1	1	0.9375	0.937063	0.846154	0.933718	0.911594
1610	1	0.857143	1	1	0.921875	0.937063	0.846154	0.930836	0.907717
1620	1	0.892857	1	1	0.921875	0.937063	0.846154	0.936599	0.915498
1630	1	0.875	1	1	0.921875	0.937063	0.846154	0.933718	0.911601
1640	1	0.875	1	1	0.921875	0.93007	0.846154	0.930836	0.907809
1650	1	0.875	1	1	0.921875	0.937063	0.846154	0.933718	0.911601
1660	1	0.875	1	1	0.921875	0.937063	0.846154	0.933718	0.911601
1670	1	0.875	1	1	0.921875	0.93007	0.846154	0.930836	0.907809
1680	1	0.892857	1	1	0.921875	0.923077	0.846154	0.930836	0.907985
1690	1	0.892857	1	1	0.921875	0.93007	0.846154	0.933718	0.911728
1700	1	0.875	1	1	0.921875	0.937063	0.846154	0.933718	0.911601
1710	1	0.875	1	1	0.921875	0.923077	0.846154	0.927954	0.904046
1720	1	0.910714	1	1	0.921875	0.923077	0.846154	0.933718	0.911938
1730	1	0.910714	1	1	0.921875	0.923077	0.846154	0.933718	0.911938
1740	1	0.910714	1	1	0.921875	0.923077	0.846154	0.933718	0.911938
1750	1	0.910714	1	1	0.90625	0.923077	0.846154	0.930836	0.907985
1760	1	0.910714	1	1	0.90625	0.923077	0.846154	0.930836	0.907985
1770	1	0.910714	1	1	0.90625	0.93007	0.846154	0.933718	0.911776
1780	1	0.910714	1	1	0.90625	0.937063	0.846154	0.936599	0.915536
1790	1	0.892857	1	1	0.90625	0.937063	0.846154	0.933718	0.911629
1800	1	0.910714	1	1	0.921875	0.937063	0.846154	0.939481	0.919409
1810	1	0.910714	1	1	0.921875	0.937063	0.846154	0.939481	0.919409
1820	1	0.910714	1	1	0.921875	0.937063	0.846154	0.939481	0.919409
1830	1	0.910714	1	1	0.921875	0.937063	0.846154	0.939481	0.919409
1840	1	0.892857	1	1	0.921875	0.937063	0.846154	0.936599	0.915498
1850	1	0.892857	1	1	0.921875	0.944056	0.846154	0.939481	0.919325
1860	1	0.910714	1	1	0.921875	0.944056	0.846154	0.942363	0.923225
1870	1	0.910714	1	1	0.921875	0.944056	0.846154	0.942363	0.923225
1880	1	0.910714	1	1	0.921875	0.944056	0.846154	0.942363	0.923225
1890	1	0.892857	1	1	0.921875	0.944056	0.846154	0.939481	0.919325
1900	1	0.892857	1	1	0.921875	0.944056	0.846154	0.939481	0.919325
1910	1	0.875	1	1	0.921875	0.944056	0.846154	0.936599	0.915439
1920	1	0.875	1	1	0.921875	0.944056	0.846154	0.936599	0.915439
1930	1	0.875	1	1	0.921875	0.944056	0.846154	0.936599	0.915439
1940	1	0.875	1	1	0.921875	0.937063	0.846154	0.933718	0.911601
1950	1	0.875	1	1	0.921875	0.93007	0.846154	0.930836	0.907809
1960	1	0.875	1	1	0.921875	0.937063	0.846154	0.933718	0.911601
1970	1	0.892857	1	1	0.921875	0.937063	0.846154	0.936599	0.915498
1980	1	0.875	1	1	0.921875	0.937063	0.846154	0.933718	0.911601
1990	1	0.875	1	1	0.921875	0.944056	0.846154	0.936599	0.915439
2000	1	0.875	1	1	0.921875	0.937063	0.846154	0.933718	0.911629
2010	1	0.875	1	1	0.921875	0.951049	0.846154	0.939481	0.919279
2020	1	0.875	1	1	0.921875	0.951049	0.846154	0.939481	0.919279
2030	1	0.875	1	1	0.921875	0.944056	0.846154	0.936599	0.915422
2040	1	0.875	1	1	0.921875	0.944056	0.846154	0.936599	0.915439
2050	1	0.875	1	1	0.921875	0.937063	0.846154	0.933718	0.911601
2060	1	0.875	1	1	0.921875	0.93007	0.846154	0.930836	0.907809
2070	1	0.875	1	1	0.921875	0.944056	0.846154	0.936599	0.915422
2080	1	0.875	1	1	0.921875	0.951049	0.846154	0.939481	0.919279
2090	1	0.875	1	1	0.921875	0.944056	0.846154	0.936599	0.915439
2100	1	0.875	1	1	0.921875	0.944056	0.846154	0.936599	0.915439
2110	1	0.875	1	1	0.921875	0.951049	0.846154	0.939481	0.919279
2120	1	0.875	1	1	0.921875	0.944056	0.846154	0.936599	0.915439
2130	1	0.875	1	1	0.921875	0.944056	0.846154	0.936599	0.915439
2140	1	0.875	1	1	0.921875	0.951049	0.846154	0.939481	0.919279
2150	1	0.892857	1	1	0.921875	0.951049	0.846154	0.942363	0.923143
2160	1	0.892857	1	1	0.921875	0.944056	0.846154	0.939481	0.919325
2170	1	0.892857	1	1	0.921875	0.944056	0.846154	0.939481	0.919325
2180	1	0.892857	1	1	0.921875	0.944056	0.846154	0.939481	0.919325
2190	1	0.892857	1	1	0.921875	0.944056	0.846154	0.939481	0.919325
2200	1	0.892857	1	1	0.921875	0.944056	0.846154	0.939481	0.919325
2210	1	0.875	1	1	0.921875	0.944056	0.846154	0.936599	0.915439
2220	1	0.875	1	1	0.921875	0.944056	0.846154	0.936599	0.915439
2230	1	0.875	1	1	0.921875	0.944056	0.846154	0.936599	0.915439
2240	1	0.875	1	1	0.921875	0.944056	0.846154	0.936599	0.915439
2250	1	0.892857	1	1	0.921875	0.944056	0.846154	0.939481	0.919325
2260	1	0.892857	1	1	0.921875	0.951049	0.846154	0.942363	0.923143
2270	1	0.892857	1	1	0.921875	0.951049	0.846154	0.942363	0.923143
2280	1	0.892857	1	1	0.921875	0.951049	0.846154	0.942363	0.923143
2290	1	0.892857	1	1	0.921875	0.951049	0.846154	0.942363	0.923143
2300	1	0.875	1	1	0.921875	0.951049	0.846154	0.939481	0.919279
2310	1	0.875	1	1	0.921875	0.951049	0.846154	0.939481	0.919279
2320	1	0.875	1	1	0.921875	0.958042	0.846154	0.942363	0.923165
2330	1	0.892857	1	1	0.921875	0.951049	0.846154	0.942363	0.923181
2340	1	0.892857	1	1	0.921875	0.951049	0.846154	0.942363	0.923181
2350	1	0.892857	1	1	0.921875	0.951049	0.846154	0.942363	0.923181
2360	1	0.910714	1	1	0.921875	0.951049	0.846154	0.945245	0.927069
2370	1	0.910714	1	1	0.921875	0.951049	0.846154	0.945245	0.927069
2380	1	0.910714	1	1	0.921875	0.951049	0.846154	0.945245	0.927069
2390	1	0.892857	1	1	0.921875	0.951049	0.846154	0.942363	0.923181
2400	1	0.892857	1	1	0.921875	0.951049	0.846154	0.942363	0.923181
2410	1	0.892857	1	1	0.921875	0.951049	0.846154	0.942363	0.923181
2420	1	0.892857	1	1	0.921875	0.951049	0.846154	0.942363	0.923181
2430	1	0.910714	1	1	0.921875	0.951049	0.846154	0.945245	0.927069
2440	1	0.910714	1	1	0.921875	0.951049	0.846154	0.945245	0.927069
2450	1	0.910714	1	1	0.921875	0.944056	0.846154	0.942363	0.923225
2460	1	0.910714	1	1	0.921875	0.944056	0.846154	0.942363	0.923225
2470	1	0.910714	1	1	0.921875	0.951049	0.846154	0.945245	0.927022
2480	1	0.910714	1	1	0.921875	0.951049	0.846154	0.945245	0.927022
2490	1	0.910714	1	1	0.921875	0.951049	0.846154	0.945245	0.927022
2500	1	0.892857	1	1	0.921875	0.944056	0.846154	0.939481	0.919325
2510	1	0.892857	1	1	0.921875	0.937063	0.846154	0.936599	0.915536
2520	1	0.875	1	1	0.921875	0.937063	0.846154	0.933718	0.911629
2530	1	0.875	1	1	0.921875	0.937063	0.846154	0.933718	0.911629
2540	1	0.857143	1	1	0.921875	0.937063	0.846154	0.930836	0.907735
2550	1	0.857143	1	1	0.921875	0.937063	0.846154	0.930836	0.907735
2560	1	0.857143	1	1	0.921875	0.937063	0.846154	0.930836	0.907735
2570	1	0.857143	1	1	0.921875	0.937063	0.846154	0.930836	0.907735
2580	1	0.857143	1	1	0.921875	0.944056	0.846154	0.933718	0.911567
2590	1	0.857143	1	1	0.921875	0.937063	0.846154	0.930836	0.907717
2600	1	0.857143	1	1	0.921875	0.93007	0.846154	0.927954	0.903904
2610	1	0.857143	1	1	0.9375	0.93007	0.846154	0.930836	0.907791
2620	1	0.857143	1	1	0.9375	0.944056	0.846154	0.936599	0.915422
2630	1	0.857143	1	1	0.921875	0.937063	0.846154	0.930836	0.907717
2640	1	0.857143	1	1	0.921875	0.93007	0.846154	0.927954	0.903904
2650	1	0.857143	1	1	0.921875	0.93007	0.846154	0.927954	0.903904
2660	1	0.857143	1	1	0.921875	0.937063	0.846154	0.930836	0.907735
2670	1	0.857143	1	1	0.921875	0.937063	0.846154	0.930836	0.907717
2680	1	0.857143	1	1	0.921875	0.937063	0.846154	0.930836	0.907717
2690	1	0.857143	1	1	0.921875	0.937063	0.846154	0.930836	0.907717
2700	1	0.857143	1	1	0.921875	0.937063	0.846154	0.930836	0.907717
2710	1	0.857143	1	1	0.921875	0.944056	0.846154	0.933718	0.911567
2720	1	0.857143	1	1	0.921875	0.944056	0.846154	0.933718	0.911567
2730	1	0.857143	1	1	0.921875	0.944056	0.846154	0.933718	0.911567
2740	1	0.857143	1	1	0.921875	0.944056	0.846154	0.933718	0.911567
2750	1	0.857143	1	1	0.9375	0.944056	0.846154	0.936599	0.915422
2760	1	0.857143	1	1	0.921875	0.944056	0.846154	0.933718	0.911567
2770	1	0.857143	1	1	0.921875	0.944056	0.846154	0.933718	0.911567
2780	1	0.857143	1	1	0.9375	0.944056	0.846154	0.936599	0.915422
2790	1	0.857143	1	1	0.921875	0.951049	0.846154	0.936599	0.915445
2800	1	0.857143	1	1	0.921875	0.944056	0.846154	0.933718	0.911567
2810	1	0.857143	1	1	0.921875	0.951049	0.846154	0.936599	0.915445
2820	1	0.857143	1	1	0.921875	0.951049	0.846154	0.936599	0.915445
2830	1	0.857143	1	1	0.9375	0.951049	0.846154	0.939481	0.919279
2840	1	0.857143	1	1	0.9375	0.951049	0.846154	0.939481	0.919279
2850	1	0.857143	1	1	0.921875	0.951049	0.846154	0.936599	0.915445
2860	1	0.857143	1	1	0.921875	0.951049	0.846154	0.936599	0.915445
2870	1	0.857143	1	1	0.921875	0.951049	0.846154	0.936599	0.915445
2880	1	0.857143	1	1	0.90625	0.951049	0.846154	0.933718	0.911625
2890	1	0.875	1	1	0.90625	0.951049	0.846154	0.936599	0.915483
2900	1	0.875	1	1	0.921875	0.951049	0.846154	0.939481	0.919306
2910	1	0.875	1	1	0.90625	0.951049	0.846154	0.936599	0.915483
2920	1	0.875	1	1	0.90625	0.951049	0.846154	0.936599	0.915483
2930	1	0.875	1	1	0.921875	0.951049	0.846154	0.939481	0.919306
2940	1	0.875	1	1	0.921875	0.951049	0.846154	0.939481	0.919306
2950	1	0.875	1	1	0.921875	0.951049	0.846154	0.939481	0.919306
2960	1	0.875	1	1	0.921875	0.951049	0.846154	0.939481	0.919306
2970	1	0.875	1	1	0.921875	0.944056	0.846154	0.936599	0.915477
2980	1	0.857143	1	1	0.9375	0.951049	0.846154	0.939481	0.919279
2990	1	0.857143	1	1	0.9375	0.951049	0.846154	0.939481	0.919279
3000	1	0.875	1	1	0.9375	0.951049	0.846154	0.942363	0.923143
3010	1	0.875	1	1	0.9375	0.951049	0.846154	0.942363	0.923143
3020	1	0.875	1	1	0.921875	0.951049	0.846154	0.939481	0.919306
3030	1	0.875	1	1	0.921875	0.951049	0.846154	0.939481	0.919306
3040	1	0.892857	1	1	0.921875	0.951049	0.846154	0.942363	0.923181
3050	1	0.875	1	1	0.921875	0.951049	0.846154	0.939481	0.919306
3060	1	0.892857	1	1	0.921875	0.951049	0.846154	0.942363	0.923181
3070	1	0.875	1	1	0.921875	0.951049	0.846154	0.939481	0.919306
3080	1	0.875	1	1	0.921875	0.951049	0.846154	0.939481	0.919306
3090	1	0.875	1	1	0.921875	0.951049	0.846154	0.939481	0.919306
3100	1	0.875	1	1	0.921875	0.951049	0.846154	0.939481	0.919306
3110	1	0.857143	1	1	0.921875	0.951049	0.846154	0.936599	0.915445
3120	1	0.875	1	1	0.921875	0.951049	0.846154	0.939481	0.919306
3130	1	0.875	1	1	0.921875	0.951049	0.846154	0.939481	0.919306
3140	1	0.892857	1	1	0.921875	0.951049	0.846154	0.942363	0.923181
3150	1	0.892857	1	1	0.921875	0.951049	0.846154	0.942363	0.923181
3160	1	0.892857	1	1	0.921875	0.951049	0.846154	0.942363	0.923181
3170	1	0.892857	1	1	0.921875	0.951049	0.846154	0.942363	0.923181
3180	1	0.892857	1	1	0.921875	0.958042	0.846154	0.945245	0.927018
3190	1	0.875	1	1	0.921875	0.958042	0.846154	0.942363	0.923165
3200	1	0.875	1	1	0.921875	0.958042	0.846154	0.942363	0.923165
3210	1	0.875	1	1	0.921875	0.958042	0.846154	0.942363	0.923165
3220	1	0.857143	1	1	0.921875	0.958042	0.846154	0.939481	0.919325
3230	1	0.857143	1	1	0.921875	0.958042	0.846154	0.939481	0.919325
3240	1	0.857143	1	1	0.921875	0.958042	0.846154	0.939481	0.919325
3250	1	0.857143	1	1	0.921875	0.958042	0.846154	0.939481	0.919325
3260	1	0.857143	1	1	0.921875	0.958042	0.846154	0.939481	0.919325
3270	1	0.875	1	1	0.921875	0.958042	0.846154	0.942363	0.923165
3280	1	0.875	1	1	0.921875	0.958042	0.846154	0.942363	0.923165
3290	1	0.875	1	1	0.921875	0.958042	0.846154	0.942363	0.923165
3300	1	0.875	1	1	0.921875	0.958042	0.846154	0.942363	0.923165
3310	1	0.875	1	1	0.921875	0.958042	0.846154	0.942363	0.923165
3320	1	0.875	1	1	0.921875	0.965035	0.846154	0.945245	0.927053
3330	1	0.875	1	1	0.921875	0.965035	0.846154	0.945245	0.927053
3340	1	0.857143	1	1	0.921875	0.965035	0.846154	0.942363	0.923235
3350	1	0.857143	1	1	0.921875	0.965035	0.846154	0.942363	0.923235
3360	1	0.875	1	1	0.921875	0.965035	0.846154	0.945245	0.927053
3370	1	0.875	1	1	0.921875	0.965035	0.846154	0.945245	0.927053
3380	1	0.875	1	1	0.921875	0.965035	0.846154	0.945245	0.927053
3390	1	0.875	1	1	0.921875	0.965035	0.846154	0.945245	0.927053
3400	1	0.857143	1	1	0.921875	0.965035	0.846154	0.942363	0.923235
3410	1	0.857143	1	1	0.921875	0.965035	0.846154	0.942363	0.923235
3420	1	0.875	1	1	0.921875	0.972028	0.846154	0.948127	0.930988
3430	1	0.857143	1	1	0.921875	0.972028	0.846154	0.945245	0.927182
3440	1	0.857143	1	1	0.921875	0.972028	0.846154	0.945245	0.927182
3450	1	0.875	1	1	0.921875	0.972028	0.846154	0.948127	0.930988
3460	1	0.875	1	1	0.921875	0.972028	0.846154	0.948127	0.930988
3470	1	0.875	1	1	0.921875	0.972028	0.846154	0.948127	0.930988
3480	1	0.875	1	1	0.90625	0.972028	0.846154	0.945245	0.927208
3490	1	0.857143	1	1	0.90625	0.965035	0.846154	0.939481	0.919464
3500	1	0.875	1	1	0.921875	0.965035	0.846154	0.945245	0.92708
3510	1	0.875	1	1	0.921875	0.965035	0.846154	0.945245	0.92708
3520	1	0.875	1	1	0.90625	0.972028	0.846154	0.945245	0.927208
3530	1	0.875	1	1	0.921875	0.972028	0.846154	0.948127	0.930988
3540	1	0.875	1	1	0.921875	0.965035	0.846154	0.945245	0.92708
3550	1	0.875	1	1	0.921875	0.965035	0.846154	0.945245	0.92708
3560	1	0.857143	1	1	0.90625	0.972028	0.846154	0.942363	0.923406
3570	1	0.857143	1	1	0.921875	0.972028	0.846154	0.945245	0.927182
3580	1	0.857143	1	1	0.921875	0.972028	0.846154	0.945245	0.927182
3590	1	0.875	1	1	0.90625	0.972028	0.846154	0.945245	0.927208
3600	1	0.857143	1	1	0.90625	0.972028	0.846154	0.942363	0.923406
3610	1	0.857143	1	1	0.921875	0.972028	0.846154	0.945245	0.927182
3620	1	0.875	1	1	0.90625	0.972028	0.846154	0.945245	0.927208
3630	1	0.875	1	1	0.90625	0.972028	0.846154	0.945245	0.927208
3640	1	0.875	1	1	0.90625	0.972028	0.846154	0.945245	0.927208
3650	1	0.875	1	1	0.9375	0.972028	0.846154	0.951009	0.934781
3660	1	0.875	1	1	0.921875	0.972028	0.846154	0.948127	0.930988
3670	1	0.875	1	1	0.9375	0.972028	0.846154	0.951009	0.934781
3680	1	0.875	1	1	0.953125	0.972028	0.846154	0.95389	0.938589
3690	1	0.892857	1	1	0.9375	0.972028	0.846154	0.95389	0.938604
3700	1	0.892857	1	1	0.9375	0.972028	0.846154	0.95389	0.938604
3710	1	0.892857	1	1	0.921875	0.972028	0.846154	0.951009	0.934807
3720	1	0.875	1	1	0.921875	0.972028	0.846154	0.948127	0.930988
3730	1	0.892857	1	1	0.921875	0.972028	0.846154	0.951009	0.934807
3740	1	0.892857	1	1	0.921875	0.972028	0.846154	0.951009	0.934807
3750	1	0.892857	1	1	0.921875	0.972028	0.846154	0.951009	0.934807
3760	1	0.892857	1	1	0.921875	0.965035	0.846154	0.948127	0.930884
3770	1	0.892857	1	1	0.921875	0.965035	0.846154	0.948127	0.930884
3780	1	0.892857	1	1	0.921875	0.965035	0.846154	0.948127	0.930884
3790	1	0.892857	1	1	0.921875	0.965035	0.846154	0.948127	0.930884
3800	1	0.892857	1	1	0.921875	0.972028	0.846154	0.951009	0.934807
3810	1	0.892857	1	1	0.921875	0.965035	0.846154	0.948127	0.930921
3820	1	0.892857	1	1	0.921875	0.958042	0.846154	0.945245	0.927018
3830	1	0.892857	1	1	0.921875	0.965035	0.846154	0.948127	0.930921
3840	1	0.892857	1	1	0.921875	0.965035	0.846154	0.948127	0.930921
3850	1	0.892857	1	1	0.921875	0.965035	0.846154	0.948127	0.930921
3860	1	0.875	1	1	0.921875	0.965035	0.846154	0.945245	0.92708
3870	1	0.892857	1	1	0.921875	0.965035	0.846154	0.948127	0.930921
3880	1	0.892857	1	1	0.921875	0.965035	0.846154	0.948127	0.930921
3890	1	0.892857	1	1	0.921875	0.958042	0.846154	0.945245	0.927065
3900	1	0.892857	1	1	0.921875	0.972028	0.846154	0.951009	0.934807
3910	1	0.875	1	1	0.921875	0.972028	0.846154	0.948127	0.930988
3920	1	0.875	1	1	0.921875	0.972028	0.846154	0.948127	0.930988
3930	1	0.875	1	1	0.921875	0.965035	0.846154	0.945245	0.92708
3940	1	0.875	1	1	0.921875	0.965035	0.846154	0.945245	0.92708
3950	1	0.875	1	1	0.921875	0.965035	0.846154	0.945245	0.92708
3960	1	0.892857	1	1	0.921875	0.965035	0.846154	0.948127	0.930921
3970	1	0.892857	1	1	0.921875	0.965035	0.846154	0.948127	0.930921
3980	1	0.892857	1	1	0.921875	0.965035	0.846154	0.948127	0.930921
3990	1	0.875	1	1	0.921875	0.965035	0.846154	0.945245	0.92708
4000	1	0.875	1	1	0.921875	0.965035	0.846154	0.945245	0.92708
4010	1	0.875	1	1	0.90625	0.965035	0.846154	0.942363	0.923289
4020	1	0.875	1	1	0.90625	0.965035	0.846154	0.942363	0.923289
4030	1	0.875	1	1	0.90625	0.965035	0.846154	0.942363	0.923289
4040	1	0.875	1	1	0.90625	0.972028	0.846154	0.945245	0.927208
4050	1	0.875	1	1	0.921875	0.972028	0.846154	0.948127	0.930988
4060	1	0.892857	1	1	0.90625	0.972028	0.846154	0.948127	0.931025
4070	1	0.892857	1	1	0.90625	0.972028	0.846154	0.948127	0.931025
4080	1	0.892857	1	1	0.90625	0.965035	0.846154	0.945245	0.927127
4090	1	0.892857	1	1	0.90625	0.965035	0.923077	0.948127	0.930971
4100	1	0.892857	1	1	0.921875	0.972028	0.923077	0.95389	0.938651
4110	1	0.892857	1	1	0.921875	0.972028	0.923077	0.95389	0.938651
4120	1	0.892857	1	1	0.921875	0.972028	0.923077	0.95389	0.938651
4130	1	0.892857	1	1	0.921875	0.965035	0.923077	0.951009	0.934761
4140	1	0.892857	1	1	0.921875	0.965035	0.846154	0.948127	0.930921
4150	1	0.892857	1	1	0.90625	0.965035	0.846154	0.945245	0.927127
4160	1	0.892857	1	1	0.90625	0.965035	0.923077	0.948127	0.930971
4170	1	0.892857	1	1	0.90625	0.965035	0.923077	0.948127	0.930971
4180	1	0.892857	1	1	0.90625	0.965035	0.923077	0.948127	0.930971
4190	1	0.892857	1	1	0.90625	0.965035	0.923077	0.948127	0.930971
4200	1	0.892857	1	1	0.90625	0.965035	0.846154	0.945245	0.927127
4210	1	0.892857	1	1	0.90625	0.965035	0.923077	0.948127	0.930971
4220	1	0.892857	1	1	0.90625	0.965035	0.923077	0.948127	0.930971
4230	1	0.892857	1	1	0.90625	0.958042	0.923077	0.945245	0.927042
4240	1	0.892857	1	1	0.90625	0.958042	0.846154	0.942363	0.923202
4250	1	0.892857	1	1	0.90625	0.958042	0.846154	0.942363	0.923202
4260	1	0.892857	1	1	0.90625	0.958042	0.846154	0.942363	0.923202
4270	1	0.892857	1	1	0.921875	0.958042	0.846154	0.945245	0.927018
4280	1	0.892857	1	1	0.90625	0.958042	0.846154	0.942363	0.923202
4290	1	0.892857	1	1	0.921875	0.958042	0.846154	0.945245	0.927018
4300	1	0.892857	1	1	0.921875	0.958042	0.846154	0.945245	0.927018
4310	1	0.892857	1	1	0.921875	0.958042	0.846154	0.945245	0.927018
4320	1	0.892857	1	1	0.90625	0.958042	0.846154	0.942363	0.923202
4330	1	0.892857	1	1	0.921875	0.958042	0.846154	0.945245	0.927018
4340	1	0.892857	1	1	0.90625	0.958042	0.846154	0.942363	0.923202
4350	1	0.892857	1	1	0.90625	0.958042	0.846154	0.942363	0.923202
4360	1	0.892857	1	1	0.90625	0.958042	0.846154	0.942363	0.923202
4370	1	0.892857	1	1	0.90625	0.958042	0.846154	0.942363	0.923202
4380	1	0.892857	1	1	0.90625	0.958042	0.846154	0.942363	0.923202
4390	1	0.892857	1	1	0.90625	0.958042	0.846154	0.942363	0.923202
4400	1	0.892857	1	1	0.90625	0.958042	0.846154	0.942363	0.923202
4410	1	0.892857	1	1	0.90625	0.958042	0.846154	0.942363	0.923202
4420	1	0.892857	1	1	0.921875	0.965035	0.846154	0.948127	0.930884
4430	1	0.892857	1	1	0.921875	0.965035	0.846154	0.948127	0.930884
4440	1	0.892857	1	1	0.90625	0.972028	0.846154	0.948127	0.931025
4450	1	0.892857	1	1	0.921875	0.972028	0.846154	0.951009	0.934807
4460	1	0.892857	1	1	0.921875	0.972028	0.846154	0.951009	0.934807
4470	1	0.892857	1	1	0.921875	0.972028	0.846154	0.951009	0.934807
4480	1	0.892857	1	1	0.921875	0.972028	0.846154	0.951009	0.934807
4490	1	0.892857	1	1	0.921875	0.972028	0.846154	0.951009	0.934807
4500	1	0.892857	1	1	0.921875	0.972028	0.846154	0.951009	0.934807
4510	1	0.892857	1	1	0.921875	0.972028	0.846154	0.951009	0.934807
4520	1	0.892857	1	1	0.921875	0.965035	0.846154	0.948127	0.930921
4530	1	0.892857	1	1	0.921875	0.965035	0.846154	0.948127	0.930921
4540	1	0.892857	1	1	0.921875	0.965035	0.846154	0.948127	0.930921
4550	1	0.892857	1	1	0.921875	0.965035	0.846154	0.948127	0.930921
4560	1	0.892857	1	1	0.921875	0.965035	0.846154	0.948127	0.930921
4570	1	0.892857	1	1	0.921875	0.965035	0.846154	0.948127	0.930921
4580	1	0.892857	1	1	0.921875	0.965035	0.846154	0.948127	0.930921
4590	1	0.892857	1	1	0.921875	0.965035	0.846154	0.948127	0.930921
4600	1	0.892857	1	1	0.921875	0.965035	0.846154	0.948127	0.930921
4610	1	0.892857	1	1	0.921875	0.965035	0.846154	0.948127	0.930921
4620	1	0.892857	1	1	0.921875	0.958042	0.846154	0.945245	0.927065
4630	1	0.892857	1	1	0.921875	0.958042	0.846154	0.945245	0.927065
4640	1	0.892857	1	1	0.921875	0.958042	0.846154	0.945245	0.927065
4650	1	0.892857	1	1	0.921875	0.965035	0.846154	0.948127	0.930921
4660	1	0.892857	1	1	0.90625	0.965035	0.846154	0.945245	0.927127
4670	1	0.892857	1	1	0.90625	0.965035	0.846154	0.945245	0.927127
4680	1	0.892857	1	1	0.90625	0.965035	0.846154	0.945245	0.927127
4690	1	0.892857	1	1	0.90625	0.965035	0.846154	0.945245	0.927127
4700	1	0.892857	1	1	0.90625	0.965035	0.846154	0.945245	0.927127
4710	1	0.892857	1	1	0.90625	0.965035	0.846154	0.945245	0.927127
4720	1	0.892857	1	1	0.90625	0.965035	0.846154	0.945245	0.927127
4730	1	0.892857	1	1	0.90625	0.965035	0.846154	0.945245	0.927127
4740	1	0.892857	1	1	0.90625	0.965035	0.846154	0.945245	0.927127
4750	1	0.892857	1	1	0.90625	0.965035	0.846154	0.945245	0.927127
4760	1	0.892857	1	1	0.90625	0.965035	0.846154	0.945245	0.927127
4770	1	0.892857	1	1	0.90625	0.965035	0.846154	0.945245	0.927127
4780	1	0.892857	1	1	0.90625	0.958042	0.846154	0.942363	0.923202
4790	1	0.892857	1	1	0.90625	0.958042	0.846154	0.942363	0.923202
4800	1	0.892857	1	1	0.90625	0.958042	0.846154	0.942363	0.923202
4810	1	0.892857	1	1	0.90625	0.951049	0.923077	0.942363	0.92319
4820	1	0.892857	1	1	0.90625	0.951049	0.923077	0.942363	0.92319
4830	1	0.892857	1	1	0.90625	0.951049	0.846154	0.939481	0.919354
4840	1	0.892857	1	1	0.90625	0.951049	0.846154	0.939481	0.919354
4850	1	0.892857	1	1	0.90625	0.958042	0.923077	0.945245	0.927042
4860	1	0.892857	1	1	0.90625	0.951049	0.923077	0.942363	0.92319
4870	1	0.892857	1	1	0.90625	0.951049	0.923077	0.942363	0.92319
4880	1	0.892857	1	1	0.90625	0.958042	0.923077	0.945245	0.927042
4890	1	0.892857	1	1	0.90625	0.958042	0.923077	0.945245	0.927042
4900	1	0.892857	1	1	0.90625	0.958042	0.923077	0.945245	0.927042
4910	1	0.892857	1	1	0.90625	0.951049	0.923077	0.942363	0.92319
4920	1	0.892857	1	1	0.90625	0.951049	0.923077	0.942363	0.92319
4930	1	0.892857	1	1	0.90625	0.951049	0.923077	0.942363	0.92319
4940	1	0.892857	1	1	0.90625	0.951049	0.923077	0.942363	0.92319
4950	1	0.892857	1	1	0.90625	0.951049	0.923077	0.942363	0.92319
4960	1	0.892857	1	1	0.90625	0.951049	0.923077	0.942363	0.92319
4970	1	0.892857	1	1	0.90625	0.951049	0.846154	0.939481	0.919354
4980	1	0.892857	1	1	0.90625	0.951049	0.923077	0.942363	0.92319
4990	1	0.892857	1	1	0.90625	0.951049	0.923077	0.942363	0.92319
5000	1	0.892857	1	1	0.90625	0.958042	0.846154	0.942363	0.923202
5010	1	0.892857	1	1	0.90625	0.958042	0.923077	0.945245	0.927042
5020	1	0.892857	1	1	0.90625	0.958042	0.923077	0.945245	0.927042
5030	1	0.892857	1	1	0.90625	0.958042	0.923077	0.945245	0.927042
5040	1	0.892857	1	1	0.90625	0.958042	0.923077	0.945245	0.927042
5050	1	0.892857	1	1	0.90625	0.958042	0.923077	0.945245	0.927042
5060	1	0.892857	1	1	0.90625	0.958042	0.923077	0.945245	0.927042
5070	1	0.892857	1	1	0.90625	0.958042	0.923077	0.945245	0.927042
5080	1	0.892857	1	1	0.90625	0.958042	0.923077	0.945245	0.927042
5090	1	0.892857	1	1	0.90625	0.958042	0.923077	0.945245	0.927042
5100	1	0.892857	1	1	0.90625	0.958042	0.923077	0.945245	0.927042
5110	1	0.892857	1	1	0.90625	0.958042	0.923077	0.945245	0.927042
5120	1	0.892857	1	1	0.90625	0.958042	0.923077	0.945245	0.927042
5130	1	0.892857	1	1	0.90625	0.958042	0.923077	0.945245	0.927042
5140	1	0.892857	1	1	0.90625	0.958042	0.923077	0.945245	0.927042
5150	1	0.892857	1	1	0.90625	0.958042	0.923077	0.945245	0.927042
5160	1	0.892857	1	1	0.90625	0.958042	0.923077	0.945245	0.927042
5170	1	0.892857	1	1	0.90625	0.958042	0.923077	0.945245	0.927042
5180	1	0.892857	1	1	0.90625	0.958042	0.923077	0.945245	0.927042
5190	1	0.892857	1	1	0.90625	0.958042	0.923077	0.945245	0.927042
5200	1	0.892857	1	1	0.90625	0.958042	0.923077	0.945245	0.927042
5210	1	0.892857	1	1	0.90625	0.958042	0.923077	0.945245	0.927042
5220	1	0.892857	1	1	0.90625	0.958042	0.923077	0.945245	0.927042
5230	1	0.892857	1	1	0.90625	0.958042	0.923077	0.945245	0.927042
5240	1	0.892857	1	1	0.90625	0.958042	0.923077	0.945245	0.927042
5250	1	0.892857	1	1	0.90625	0.958042	0.923077	0.945245	0.927042
5260	1	0.892857	1	1	0.90625	0.958042	0.923077	0.945245	0.927042
5270	1	0.892857	1	1	0.90625	0.958042	0.923077	0.945245	0.927042
5280	1	0.892857	1	1	0.90625	0.958042	0.923077	0.945245	0.927042
5290	1	0.892857	1	1	0.90625	0.958042	0.923077	0.945245	0.927042
5300	1	0.892857	1	1	0.90625	0.958042	0.923077	0.945245	0.927042
5310	1	0.892857	1	1	0.90625	0.958042	0.923077	0.945245	0.927042
5320	1	0.892857	1	1	0.90625	0.958042	0.923077	0.945245	0.927042
5330	1	0.892857	1	1	0.90625	0.958042	0.923077	0.945245	0.927042
5340	1	0.892857	1	1	0.90625	0.958042	0.923077	0.945245	0.927042
5350	1	0.892857	1	1	0.90625	0.958042	0.923077	0.945245	0.927042
5360	1	0.892857	1	1	0.90625	0.958042	0.923077	0.945245	0.927042
5370	1	0.892857	1	1	0.90625	0.958042	0.923077	0.945245	0.927042
5380	1	0.892857	1	1	0.90625	0.958042	0.923077	0.945245	0.927042
5390	1	0.892857	1	1	0.90625	0.958042	0.923077	0.945245	0.927042
5400	1	0.892857	1	1	0.90625	0.958042	0.923077	0.945245	0.927042
5410	1	0.892857	1	1	0.90625	0.958042	0.923077	0.945245	0.927042
5420	1	0.892857	1	1	0.90625	0.958042	0.923077	0.945245	0.927042
5430	1	0.892857	1	1	0.90625	0.958042	0.923077	0.945245	0.927042
5440	1	0.892857	1	1	0.90625	0.958042	0.923077	0.945245	0.927042
5450	1	0.892857	1	1	0.90625	0.958042	0.923077	0.945245	0.927042
5460	1	0.892857	1	1	0.90625	0.958042	0.923077	0.945245	0.927042
5470	1	0.892857	1	1	0.90625	0.958042	0.923077	0.945245	0.927042
5480	1	0.892857	1	1	0.90625	0.958042	0.923077	0.945245	0.927042
5490	1	0.892857	1	1	0.90625	0.958042	0.923077	0.945245	0.927042
5500	1	0.892857	1	1	0.90625	0.958042	0.923077	0.945245	0.927042
5510	1	0.892857	1	1	0.90625	0.958042	0.923077	0.945245	0.927042
5520	1	0.892857	1	1	0.90625	0.958042	0.923077	0.945245	0.927042
5530	1	0.892857	1	1	0.90625	0.958042	0.923077	0.945245	0.927042
5540	1	0.892857	1	1	0.90625	0.958042	0.923077	0.945245	0.927042
5550	1	0.892857	1	1	0.90625	0.958042	0.923077	0.945245	0.927042
5560	1	0.892857	1	1	0.90625	0.958042	0.923077	0.945245	0.927042
5570	1	0.892857	1	1	0.90625	0.965035	0.923077	0.948127	0.930971
5580	1	0.892857	1	1	0.90625	0.965035	0.923077	0.948127	0.930971
5590	1	0.892857	1	1	0.90625	0.958042	0.923077	0.945245	0.927042
5600	1	0.892857	1	1	0.90625	0.958042	0.923077	0.945245	0.927042
5610	1	0.892857	1	1	0.90625	0.958042	0.923077	0.945245	0.927042
5620	1	0.892857	1	1	0.90625	0.958042	0.923077	0.945245	0.927042
5630	1	0.892857	1	1	0.90625	0.965035	0.923077	0.948127	0.930971
5640	1	0.892857	1	1	0.90625	0.965035	0.923077	0.948127	0.930971
5650	1	0.892857	1	1	0.90625	0.965035	0.923077	0.948127	0.930971
5660	1	0.892857	1	1	0.90625	0.958042	0.923077	0.945245	0.927042
5670	1	0.892857	1	1	0.90625	0.958042	0.923077	0.945245	0.927042
5680	1	0.892857	1	1	0.90625	0.958042	0.923077	0.945245	0.927042
5690	1	0.892857	1	1	0.90625	0.965035	0.923077	0.948127	0.930971
5700	1	0.892857	1	1	0.90625	0.965035	0.923077	0.948127	0.930971
5710	1	0.892857	1	1	0.90625	0.965035	0.923077	0.948127	0.930971
5720	1	0.892857	1	1	0.90625	0.958042	0.923077	0.945245	0.927042
5730	1	0.892857	1	1	0.90625	0.958042	0.923077	0.945245	0.927042
5740	1	0.892857	1	1	0.90625	0.958042	0.923077	0.945245	0.927042
5750	1	0.892857	1	1	0.90625	0.958042	0.923077	0.945245	0.927042
5760	1	0.892857	1	1	0.90625	0.958042	0.923077	0.945245	0.927042
5770	1	0.892857	1	1	0.90625	0.958042	0.923077	0.945245	0.927042
5780	1	0.892857	1	1	0.90625	0.958042	0.923077	0.945245	0.927042
5790	1	0.892857	1	1	0.90625	0.958042	0.923077	0.945245	0.927042
5800	1	0.892857	1	1	0.90625	0.958042	0.923077	0.945245	0.927042
5810	1	0.892857	1	1	0.90625	0.958042	0.923077	0.945245	0.927042
5820	1	0.892857	1	1	0.90625	0.958042	0.923077	0.945245	0.927042
5830	1	0.892857	1	1	0.90625	0.958042	0.923077	0.945245	0.927042
5840	1	0.892857	1	1	0.90625	0.958042	0.923077	0.945245	0.927042
5850	1	0.892857	1	1	0.90625	0.958042	0.923077	0.945245	0.927042
5860	1	0.892857	1	1	0.90625	0.958042	0.923077	0.945245	0.927042
5870	1	0.892857	1	1	0.90625	0.958042	0.923077	0.945245	0.927042
5880	1	0.892857	1	1	0.90625	0.958042	0.923077	0.945245	0.927042
5890	1	0.892857	1	1	0.90625	0.958042	0.923077	0.945245	0.927042
5900	1	0.892857	1	1	0.90625	0.958042	0.923077	0.945245	0.927042
5910	1	0.892857	1	1	0.90625	0.958042	0.923077	0.945245	0.927042
5920	1	0.892857	1	1	0.90625	0.958042	0.923077	0.945245	0.927042
5930	1	0.892857	1	1	0.90625	0.958042	0.923077	0.945245	0.927042
5940	1	0.892857	1	1	0.90625	0.958042	0.923077	0.945245	0.927042
5950	1	0.892857	1	1	0.90625	0.958042	0.923077	0.945245	0.927042
5960	1	0.892857	1	1	0.90625	0.958042	0.923077	0.945245	0.927042
5970	1	0.892857	1	1	0.90625	0.958042	0.923077	0.945245	0.927042
5980	1	0.892857	1	1	0.90625	0.958042	0.923077	0.945245	0.927042
5990	1	0.892857	1	1	0.90625	0.958042	0.923077	0.945245	0.927042
6000	1	0.892857	1	1	0.90625	0.958042	0.923077	0.945245	0.927042
6010	1	0.892857	1	1	0.90625	0.958042	0.923077	0.945245	0.927042
6020	1	0.892857	1	1	0.90625	0.958042	0.923077	0.945245	0.927042
6030	1	0.892857	1	1	0.90625	0.958042	0.923077	0.945245	0.927042
6040	1	0.892857	1	1	0.90625	0.958042	0.923077	0.945245	0.927042
6050	1	0.892857	1	1	0.90625	0.958042	0.923077	0.945245	0.927042
6060	1	0.892857	1	1	0.90625	0.958042	0.923077	0.945245	0.927042
6070	1	0.892857	1	1	0.90625	0.958042	0.923077	0.945245	0.927042
6080	1	0.892857	1	1	0.90625	0.958042	0.923077	0.945245	0.927042
6090	1	0.892857	1	1	0.90625	0.958042	0.923077	0.945245	0.927042
6100	1	0.892857	1	1	0.90625	0.958042	0.923077	0.945245	0.927042
6110	1	0.892857	1	1	0.90625	0.958042	0.923077	0.945245	0.927042
6120	1	0.892857	1	1	0.90625	0.958042	0.923077	0.945245	0.927042
6130	1	0.892857	1	1	0.90625	0.958042	0.923077	0.945245	0.927042
6140	1	0.892857	1	1	0.90625	0.958042	0.923077	0.945245	0.927042
6150	1	0.892857	1	1	0.90625	0.958042	0.923077	0.945245	0.927042
6160	1	0.892857	1	1	0.90625	0.958042	0.923077	0.945245	0.927042
6170	1	0.892857	1	1	0.90625	0.958042	0.923077	0.945245	0.927042
6180	1	0.892857	1	1	0.90625	0.958042	0.923077	0.945245	0.927042
6190	1	0.892857	1	1	0.90625	0.958042	0.923077	0.945245	0.927042
6200	1	0.892857	1	1	0.90625	0.958042	0.923077	0.945245	0.927042
6210	1	0.892857	1	1	0.90625	0.958042	0.923077	0.945245	0.927042
6220	1	0.892857	1	1	0.90625	0.958042	0.923077	0.945245	0.927042
6230	1	0.892857	1	1	0.90625	0.958042	0.923077	0.945245	0.927042
6240	1	0.892857	1	1	0.90625	0.958042	0.923077	0.945245	0.927042
6250	1	0.892857	1	1	0.90625	0.958042	0.923077	0.945245	0.927042
6260	1	0.892857	1	1	0.90625	0.958042	0.923077	0.945245	0.927042
6270	1	0.892857	1	1	0.90625	0.958042	0.923077	0.945245	0.927042
6280	1	0.892857	1	1	0.90625	0.958042	0.923077	0.945245	0.927042
6290	1	0.892857	1	1	0.90625	0.958042	0.923077	0.945245	0.927042
6300	1	0.892857	1	1	0.90625	0.958042	0.923077	0.945245	0.927042
6310	1	0.892857	1	1	0.90625	0.958042	0.923077	0.945245	0.927042
6320	1	0.892857	1	1	0.90625	0.958042	0.923077	0.945245	0.927042
6330	1	0.892857	1	1	0.90625	0.958042	0.923077	0.945245	0.927042
6340	1	0.892857	1	1	0.90625	0.958042	0.923077	0.945245	0.927042
6350	1	0.892857	1	1	0.90625	0.958042	0.923077	0.945245	0.927042
6360	1	0.892857	1	1	0.90625	0.958042	0.923077	0.945245	0.927042
6370	1	0.892857	1	1	0.90625	0.958042	0.923077	0.945245	0.927042
6380	1	0.892857	1	1	0.90625	0.958042	0.923077	0.945245	0.927042
6390	1	0.892857	1	1	0.90625	0.958042	0.923077	0.945245	0.927042
6400	1	0.892857	1	1	0.90625	0.958042	0.923077	0.945245	0.927042
6410	1	0.892857	1	1	0.90625	0.958042	0.923077	0.945245	0.927042
6420	1	0.892857	1	1	0.90625	0.958042	0.923077	0.945245	0.927042
6430	1	0.892857	1	1	0.90625	0.958042	0.923077	0.945245	0.927042
6440	1	0.892857	1	1	0.90625	0.958042	0.923077	0.945245	0.927042
6450	1	0.892857	1	1	0.90625	0.958042	0.923077	0.945245	0.927042
6460	1	0.892857	1	1	0.90625	0.958042	0.923077	0.945245	0.927042
6470	1	0.892857	1	1	0.90625	0.958042	0.923077	0.945245	0.927042
6480	1	0.892857	1	1	0.90625	0.958042	0.923077	0.945245	0.927042
6490	1	0.892857	1	1	0.90625	0.958042	0.923077	0.945245	0.927042
6500	1	0.892857	1	1	0.90625	0.958042	0.923077	0.945245	0.927042
6510	1	0.875	1	1	0.90625	0.958042	0.923077	0.942363	0.923196
6520	1	0.875	1	1	0.90625	0.958042	0.923077	0.942363	0.923196
6530	1	0.875	1	1	0.90625	0.958042	0.923077	0.942363	0.923196
6540	1	0.875	1	1	0.90625	0.958042	0.923077	0.942363	0.923196
6550	1	0.875	1	1	0.90625	0.958042	0.923077	0.942363	0.923196
6560	1	0.875	1	1	0.90625	0.958042	0.923077	0.942363	0.923196
6570	1	0.875	1	1	0.90625	0.958042	0.923077	0.942363	0.923196
6580	1	0.875	1	1	0.90625	0.958042	0.923077	0.942363	0.923196
6590	1	0.875	1	1	0.90625	0.958042	0.923077	0.942363	0.923196
6600	1	0.875	1	1	0.90625	0.958042	0.923077	0.942363	0.923196
6610	1	0.875	1	1	0.90625	0.958042	0.923077	0.942363	0.923196
6620	1	0.875	1	1	0.90625	0.958042	0.923077	0.942363	0.923196
6630	1	0.875	1	1	0.90625	0.958042	0.923077	0.942363	0.923196
6640	1	0.875	1	1	0.90625	0.958042	0.923077	0.942363	0.923196
6650	1	0.875	1	1	0.90625	0.958042	0.923077	0.942363	0.923196
6660	1	0.875	1	1	0.90625	0.958042	0.923077	0.942363	0.923196
6670	1	0.875	1	1	0.90625	0.958042	0.923077	0.942363	0.923196
6680	1	0.875	1	1	0.90625	0.958042	0.923077	0.942363	0.923196
6690	1	0.875	1	1	0.90625	0.958042	0.923077	0.942363	0.923196
6700	1	0.875	1	1	0.90625	0.958042	0.923077	0.942363	0.923196
6710	1	0.875	1	1	0.90625	0.958042	0.923077	0.942363	0.923196
6720	1	0.875	1	1	0.90625	0.958042	0.923077	0.942363	0.923196
6730	1	0.875	1	1	0.90625	0.958042	0.923077	0.942363	0.923196
6740	1	0.875	1	1	0.90625	0.958042	0.923077	0.942363	0.923196
6750	1	0.875	1	1	0.90625	0.958042	0.923077	0.942363	0.923196
6760	1	0.875	1	1	0.90625	0.958042	0.923077	0.942363	0.923196
6770	1	0.875	1	1	0.90625	0.958042	0.923077	0.942363	0.923196
6780	1	0.875	1	1	0.90625	0.958042	0.923077	0.942363	0.923196
6790	1	0.875	1	1	0.90625	0.958042	0.923077	0.942363	0.923196
6800	1	0.875	1	1	0.90625	0.958042	0.923077	0.942363	0.923196
6810	1	0.875	1	1	0.90625	0.958042	0.923077	0.942363	0.923196
6820	1	0.875	1	1	0.90625	0.958042	0.923077	0.942363	0.923196
6830	1	0.875	1	1	0.90625	0.958042	0.923077	0.942363	0.923196
6840	1	0.875	1	1	0.90625	0.958042	0.923077	0.942363	0.923196
6850	1	0.875	1	1	0.90625	0.958042	0.923077	0.942363	0.923196
6860	1	0.875	1	1	0.90625	0.958042	0.923077	0.942363	0.923196
6870	1	0.875	1	1	0.90625	0.958042	0.923077	0.942363	0.923196
6880	1	0.875	1	1	0.90625	0.958042	0.923077	0.942363	0.923196
6890	1	0.875	1	1	0.90625	0.958042	0.923077	0.942363	0.923196
6900	1	0.875	1	1	0.90625	0.958042	0.923077	0.942363	0.923196
6910	1	0.875	1	1	0.90625	0.958042	0.923077	0.942363	0.923196
6920	1	0.875	1	1	0.90625	0.958042	0.923077	0.942363	0.923196
6930	1	0.875	1	1	0.90625	0.958042	0.923077	0.942363	0.923196
6940	1	0.875	1	1	0.90625	0.958042	0.923077	0.942363	0.923196
6950	1	0.875	1	1	0.90625	0.958042	0.923077	0.942363	0.923196
6960	1	0.875	1	1	0.90625	0.958042	0.923077	0.942363	0.923196
6970	1	0.875	1	1	0.90625	0.958042	0.923077	0.942363	0.923196
6980	1	0.875	1	1	0.90625	0.958042	0.923077	0.942363	0.923196
6990	1	0.875	1	1	0.90625	0.958042	0.923077	0.942363	0.923196
7000	1	0.875	1	1	0.90625	0.958042	0.923077	0.942363	0.923196
7010	1	0.875	1	1	0.90625	0.958042	0.923077	0.942363	0.923196
7020	1	0.875	1	1	0.90625	0.958042	0.923077	0.942363	0.923196
7030	1	0.875	1	1	0.90625	0.958042	0.923077	0.942363	0.923196
7040	1	0.875	1	1	0.90625	0.958042	0.923077	0.942363	0.923196
7050	1	0.875	1	1	0.90625	0.958042	0.923077	0.942363	0.923196
7060	1	0.875	1	1	0.90625	0.958042	0.923077	0.942363	0.923196
7070	1	0.875	1	1	0.90625	0.958042	0.923077	0.942363	0.923196
7080	1	0.875	1	1	0.90625	0.958042	0.923077	0.942363	0.923196
7090	1	0.875	1	1	0.90625	0.958042	0.923077	0.942363	0.923196
7100	1	0.875	1	1	0.90625	0.958042	0.923077	0.942363	0.923196
7110	1	0.875	1	1	0.90625	0.958042	0.923077	0.942363	0.923196
7120	1	0.875	1	1	0.90625	0.958042	0.923077	0.942363	0.923196
7130	1	0.875	1	1	0.90625	0.958042	0.923077	0.942363	0.923196
7140	1	0.875	1	1	0.90625	0.958042	0.923077	0.942363	0.923196
7150	1	0.875	1	1	0.90625	0.958042	0.923077	0.942363	0.923196
7160	1	0.875	1	1	0.90625	0.958042	0.923077	0.942363	0.923196
7170	1	0.875	1	1	0.90625	0.958042	0.923077	0.942363	0.923196
7180	1	0.875	1	1	0.90625	0.958042	0.923077	0.942363	0.923196
7190	1	0.875	1	1	0.90625	0.958042	0.923077	0.942363	0.923196
7200	1	0.875	1	1	0.90625	0.958042	0.923077	0.942363	0.923196
7210	1	0.875	1	1	0.90625	0.958042	0.923077	0.942363	0.923196
7220	1	0.875	1	1	0.90625	0.958042	0.923077	0.942363	0.923196
7230	1	0.875	1	1	0.90625	0.958042	0.923077	0.942363	0.923196
7240	1	0.875	1	1	0.90625	0.958042	0.923077	0.942363	0.923196
7250	1	0.875	1	1	0.90625	0.958042	0.923077	0.942363	0.923196
7260	1	0.875	1	1	0.90625	0.958042	0.923077	0.942363	0.923196
7270	1	0.875	1	1	0.90625	0.958042	0.923077	0.942363	0.923196
7280	1	0.875	1	1	0.90625	0.958042	0.923077	0.942363	0.923196
7290	1	0.875	1	1	0.90625	0.958042	0.923077	0.942363	0.923196
7300	1	0.875	1	1	0.90625	0.958042	0.923077	0.942363	0.923196
7310	1	0.875	1	1	0.90625	0.958042	0.923077	0.942363	0.923196
7320	1	0.875	1	1	0.90625	0.958042	0.923077	0.942363	0.923196
7330	1	0.875	1	1	0.90625	0.958042	0.923077	0.942363	0.923196
7340	1	0.875	1	1	0.90625	0.958042	0.923077	0.942363	0.923196
7350	1	0.875	1	1	0.90625	0.958042	0.923077	0.942363	0.923196
7360	1	0.875	1	1	0.90625	0.958042	0.923077	0.942363	0.923196
7370	1	0.875	1	1	0.90625	0.958042	0.923077	0.942363	0.923196
7380	1	0.875	1	1	0.90625	0.958042	0.923077	0.942363	0.923196
7390	1	0.875	1	1	0.90625	0.958042	0.923077	0.942363	0.923196
7400	1	0.875	1	1	0.90625	0.958042	0.923077	0.942363	0.923196
7410	1	0.875	1	1	0.90625	0.958042	0.923077	0.942363	0.923196
7420	1	0.875	1	1	0.90625	0.958042	0.923077	0.942363	0.923196
7430	1	0.875	1	1	0.90625	0.958042	0.923077	0.942363	0.923196
7440	1	0.875	1	1	0.90625	0.958042	0.923077	0.942363	0.923196
7450	1	0.875	1	1	0.90625	0.958042	0.923077	0.942363	0.923196
7460	1	0.875	1	1	0.90625	0.958042	0.923077	0.942363	0.923196
7470	1	0.875	1	1	0.90625	0.958042	0.923077	0.942363	0.923196
7480	1	0.875	1	1	0.90625	0.958042	0.923077	0.942363	0.923196
7490	1	0.875	1	1	0.90625	0.958042	0.923077	0.942363	0.923196
7500	1	0.875	1	1	0.90625	0.958042	0.923077	0.942363	0.923196
7510	1	0.875	1	1	0.90625	0.958042	0.923077	0.942363	0.923196
7520	1	0.875	1	1	0.90625	0.958042	0.923077	0.942363	0.923196
7530	1	0.875	1	1	0.90625	0.958042	0.923077	0.942363	0.923196
7540	1	0.875	1	1	0.90625	0.958042	0.923077	0.942363	0.923196
7550	1	0.875	1	1	0.90625	0.958042	0.923077	0.942363	0.923196
7560	1	0.875	1	1	0.90625	0.958042	0.923077	0.942363	0.923196
7570	1	0.875	1	1	0.90625	0.958042	0.923077	0.942363	0.923196
7580	1	0.875	1	1	0.90625	0.958042	0.923077	0.942363	0.923196
7590	1	0.875	1	1	0.90625	0.958042	0.923077	0.942363	0.923196
7600	1	0.875	1	1	0.90625	0.958042	0.923077	0.942363	0.923196
7610	1	0.875	1	1	0.90625	0.958042	0.923077	0.942363	0.923196
7620	1	0.875	1	1	0.90625	0.958042	0.923077	0.942363	0.923196
7630	1	0.875	1	1	0.90625	0.958042	0.923077	0.942363	0.923196
7640	1	0.875	1	1	0.90625	0.958042	0.923077	0.942363	0.923196
7650	1	0.875	1	1	0.90625	0.958042	0.923077	0.942363	0.923196
7660	1	0.875	1	1	0.90625	0.958042	0.923077	0.942363	0.923196
7670	1	0.875	1	1	0.90625	0.958042	0.923077	0.942363	0.923196
7680	1	0.875	1	1	0.90625	0.958042	0.923077	0.942363	0.923196
7690	1	0.875	1	1	0.90625	0.958042	0.923077	0.942363	0.923196
7700	1	0.875	1	1	0.90625	0.958042	0.923077	0.942363	0.923196
7710	1	0.875	1	1	0.90625	0.958042	0.923077	0.942363	0.923196
7720	1	0.875	1	1	0.90625	0.958042	0.923077	0.942363	0.923196
7730	1	0.875	1	1	0.90625	0.958042	0.923077	0.942363	0.923196
7740	1	0.875	1	1	0.90625	0.958042	0.923077	0.942363	0.923196
7750	1	0.875	1	1	0.90625	0.958042	0.923077	0.942363	0.923196
7760	1	0.875	1	1	0.90625	0.958042	0.923077	0.942363	0.923196
7770	1	0.875	1	1	0.90625	0.958042	0.923077	0.942363	0.923196
7780	1	0.875	1	1	0.90625	0.958042	0.923077	0.942363	0.923196
7790	1	0.875	1	1	0.90625	0.958042	0.923077	0.942363	0.923196
7800	1	0.875	1	1	0.90625	0.958042	0.923077	0.942363	0.923196
7810	1	0.875	1	1	0.90625	0.958042	0.923077	0.942363	0.923196
7820	1	0.875	1	1	0.90625	0.958042	0.923077	0.942363	0.923196
7830	1	0.875	1	1	0.90625	0.958042	0.923077	0.942363	0.923196
7840	1	0.875	1	1	0.90625	0.958042	0.923077	0.942363	0.923196
7850	1	0.875	1	1	0.90625	0.958042	0.923077	0.942363	0.923196
7860	1	0.875	1	1	0.90625	0.958042	0.923077	0.942363	0.923196
7870	1	0.875	1	1	0.90625	0.958042	0.923077	0.942363	0.923196
7880	1	0.875	1	1	0.90625	0.958042	0.923077	0.942363	0.923196
7890	1	0.875	1	1	0.90625	0.958042	0.923077	0.942363	0.923196
7900	1	0.875	1	1	0.90625	0.958042	0.923077	0.942363	0.923196
7910	1	0.875	1	1	0.90625	0.958042	0.923077	0.942363	0.923196
7920	1	0.875	1	1	0.90625	0.958042	0.923077	0.942363	0.923196
7930	1	0.875	1	1	0.90625	0.958042	0.923077	0.942363	0.923196
7940	1	0.875	1	1	0.90625	0.958042	0.923077	0.942363	0.923196
7950	1	0.875	1	1	0.90625	0.958042	0.923077	0.942363	0.923196
7960	1	0.875	1	1	0.90625	0.958042	0.923077	0.942363	0.923196
7970	1	0.875	1	1	0.90625	0.958042	0.923077	0.942363	0.923196
7980	1	0.875	1	1	0.90625	0.958042	0.923077	0.942363	0.923196
7990	1	0.875	1	1	0.90625	0.958042	0.923077	0.942363	0.923196
8000	1	0.875	1	1	0.90625	0.958042	0.923077	0.942363	0.923196
8010	1	0.875	1	1	0.90625	0.958042	0.923077	0.942363	0.923196
8020	1	0.875	1	1	0.90625	0.958042	0.923077	0.942363	0.923196
8030	1	0.875	1	1	0.90625	0.958042	0.923077	0.942363	0.923196
8040	1	0.875	1	1	0.90625	0.958042	0.923077	0.942363	0.923196
8050	1	0.857143	1	1	0.90625	0.958042	0.923077	0.939481	0.919364
8060	1	0.875	1	1	0.90625	0.958042	0.923077	0.942363	0.923196
8070	1	0.875	1	1	0.90625	0.958042	0.923077	0.942363	0.923196
8080	1	0.875	1	1	0.90625	0.958042	0.923077	0.942363	0.923196
8090	1	0.875	1	1	0.90625	0.958042	0.923077	0.942363	0.923196
8100	1	0.875	1	1	0.90625	0.951049	0.923077	0.939481	0.919322
8110	1	0.875	1	1	0.90625	0.951049	0.923077	0.939481	0.919322
8120	1	0.875	1	1	0.90625	0.951049	0.923077	0.939481	0.919322
8130	1	0.875	1	1	0.90625	0.951049	0.923077	0.939481	0.919322
8140	1	0.875	1	1	0.90625	0.951049	0.923077	0.939481	0.919322
8150	1	0.875	1	1	0.90625	0.951049	0.923077	0.939481	0.919322
8160	1	0.875	1	1	0.90625	0.951049	0.923077	0.939481	0.919322
8170	1	0.875	1	1	0.90625	0.958042	0.923077	0.942363	0.923244
8180	1	0.875	1	1	0.90625	0.951049	0.923077	0.939481	0.919322
8190	1	0.875	1	1	0.90625	0.958042	0.923077	0.942363	0.923244
8200	1	0.875	1	1	0.90625	0.958042	0.923077	0.942363	0.923244
8210	1	0.875	1	1	0.90625	0.958042	0.923077	0.942363	0.923244
8220	1	0.875	1	1	0.90625	0.951049	0.923077	0.939481	0.919322
8230	1	0.875	1	1	0.90625	0.951049	0.923077	0.939481	0.919322
8240	1	0.875	1	1	0.90625	0.951049	0.923077	0.939481	0.919322
8250	1	0.875	1	1	0.90625	0.951049	0.923077	0.939481	0.919322
8260	1	0.875	1	1	0.90625	0.951049	0.923077	0.939481	0.919322
8270	1	0.875	1	1	0.90625	0.958042	0.923077	0.942363	0.923244
8280	1	0.875	1	1	0.90625	0.958042	0.923077	0.942363	0.923244
8290	1	0.875	1	1	0.90625	0.965035	0.923077	0.945245	0.927137
8300	1	0.875	1	1	0.90625	0.965035	0.923077	0.945245	0.927137
8310	1	0.875	1	1	0.90625	0.965035	0.923077	0.945245	0.927137
8320	1	0.875	1	1	0.90625	0.965035	0.923077	0.945245	0.927137
8330	1	0.875	1	1	0.90625	0.965035	0.923077	0.945245	0.927137
8340	1	0.875	1	1	0.90625	0.958042	0.923077	0.942363	0.923244
8350	1	0.875	1	1	0.90625	0.958042	0.923077	0.942363	0.923244
8360	1	0.875	1	1	0.90625	0.965035	0.923077	0.945245	0.927137
8370	1	0.875	1	1	0.90625	0.965035	0.923077	0.945245	0.927137
8380	1	0.875	1	1	0.90625	0.965035	0.923077	0.945245	0.927137
8390	1	0.875	1	1	0.90625	0.958042	0.923077	0.942363	0.923244
8400	1	0.875	1	1	0.90625	0.958042	0.923077	0.942363	0.923244
8410	1	0.875	1	1	0.90625	0.965035	0.923077	0.945245	0.927137
8420	1	0.875	1	1	0.90625	0.965035	0.923077	0.945245	0.927137
8430	1	0.875	1	1	0.90625	0.965035	0.923077	0.945245	0.927137
8440	1	0.875	1	1	0.90625	0.965035	0.923077	0.945245	0.927137
8450	1	0.875	1	1	0.90625	0.965035	0.923077	0.945245	0.927137
8460	1	0.875	1	1	0.90625	0.972028	0.923077	0.948127	0.93106
8470	1	0.875	1	1	0.90625	0.972028	0.923077	0.948127	0.93106
8480	1	0.875	1	1	0.90625	0.972028	0.923077	0.948127	0.93106
8490	1	0.875	1	1	0.90625	0.965035	0.923077	0.945245	0.927137
8500	1	0.875	1	1	0.90625	0.965035	0.923077	0.945245	0.927137
8510	1	0.875	1	1	0.90625	0.965035	0.923077	0.945245	0.927137
8520	1	0.875	1	1	0.90625	0.972028	0.923077	0.948127	0.93106
8530	1	0.875	1	1	0.90625	0.972028	0.923077	0.948127	0.93106
8540	1	0.875	1	1	0.90625	0.972028	0.923077	0.948127	0.93106
8550	1	0.875	1	1	0.90625	0.972028	0.923077	0.948127	0.93106
8560	1	0.875	1	1	0.90625	0.972028	0.923077	0.948127	0.93106
8570	1	0.875	1	1	0.90625	0.965035	0.923077	0.945245	0.927137
8580	1	0.875	1	1	0.90625	0.972028	0.923077	0.948127	0.93106
8590	1	0.875	1	1	0.90625	0.972028	0.923077	0.948127	0.93106
8600	1	0.875	1	1	0.90625	0.972028	0.923077	0.948127	0.93106
8610	1	0.875	1	1	0.90625	0.972028	0.923077	0.948127	0.93106
8620	1	0.875	1	1	0.90625	0.965035	0.923077	0.945245	0.927137
8630	1	0.875	1	1	0.90625	0.965035	0.923077	0.945245	0.927137
8640	1	0.857143	1	1	0.90625	0.965035	0.923077	0.942363	0.923316
8650	1	0.857143	1	1	0.90625	0.965035	0.923077	0.942363	0.923316
8660	1	0.875	1	1	0.90625	0.965035	0.923077	0.945245	0.927137
8670	1	0.857143	1	1	0.90625	0.965035	0.923077	0.942363	0.923316
8680	1	0.857143	1	1	0.90625	0.965035	0.923077	0.942363	0.923316
8690	1	0.857143	1	1	0.90625	0.965035	0.923077	0.942363	0.923316
8700	1	0.857143	1	1	0.90625	0.965035	0.923077	0.942363	0.923316
8710	1	0.857143	1	1	0.90625	0.965035	0.923077	0.942363	0.923316
8720	1	0.857143	1	1	0.90625	0.965035	0.923077	0.942363	0.923316
8730	1	0.857143	1	1	0.90625	0.965035	0.923077	0.942363	0.923316
8740	1	0.857143	1	1	0.90625	0.965035	0.923077	0.942363	0.923316
8750	1	0.857143	1	1	0.90625	0.965035	0.923077	0.942363	0.923316
8760	1	0.857143	1	1	0.90625	0.965035	0.923077	0.942363	0.923316
8770	1	0.857143	1	1	0.90625	0.965035	0.923077	0.942363	0.923316
8780	1	0.857143	1	1	0.90625	0.965035	0.923077	0.942363	0.923316
8790	1	0.857143	1	1	0.90625	0.965035	0.923077	0.942363	0.923316
8800	1	0.857143	1	1	0.90625	0.965035	0.923077	0.942363	0.923316
8810	1	0.857143	1	1	0.90625	0.965035	0.923077	0.942363	0.923316
8820	1	0.857143	1	1	0.90625	0.965035	0.923077	0.942363	0.923316
8830	1	0.857143	1	1	0.90625	0.965035	0.923077	0.942363	0.923316
8840	1	0.857143	1	1	0.90625	0.965035	0.923077	0.942363	0.923316
8850	1	0.857143	1	1	0.90625	0.965035	0.923077	0.942363	0.923316
8860	1	0.857143	1	1	0.90625	0.965035	0.923077	0.942363	0.923316
8870	1	0.857143	1	1	0.90625	0.965035	0.923077	0.942363	0.923316
8880	1	0.857143	1	1	0.90625	0.965035	0.923077	0.942363	0.923316
8890	1	0.857143	1	1	0.90625	0.965035	0.923077	0.942363	0.923316
8900	1	0.857143	1	1	0.90625	0.965035	0.923077	0.942363	0.923316
8910	1	0.857143	1	1	0.90625	0.965035	0.923077	0.942363	0.923316
8920	1	0.857143	1	1	0.90625	0.965035	0.923077	0.942363	0.923316
8930	1	0.857143	1	1	0.90625	0.965035	0.923077	0.942363	0.923316
8940	1	0.857143	1	1	0.90625	0.965035	0.923077	0.942363	0.923316
8950	1	0.857143	1	1	0.90625	0.965035	0.923077	0.942363	0.923316
8960	1	0.857143	1	1	0.90625	0.965035	0.923077	0.942363	0.923316
8970	1	0.857143	1	1	0.90625	0.965035	0.923077	0.942363	0.923316
8980	1	0.857143	1	1	0.90625	0.965035	0.923077	0.942363	0.923316
8990	1	0.857143	1	1	0.90625	0.965035	0.923077	0.942363	0.923316
9000	1	0.857143	1	1	0.90625	0.965035	0.923077	0.942363	0.923316
9010	1	0.857143	1	1	0.90625	0.965035	0.923077	0.942363	0.923316
9020	1	0.857143	1	1	0.90625	0.965035	0.923077	0.942363	0.923316
9030	1	0.857143	1	1	0.90625	0.965035	0.923077	0.942363	0.923316
9040	1	0.857143	1	1	0.90625	0.965035	0.923077	0.942363	0.923316
9050	1	0.857143	1	1	0.90625	0.965035	0.923077	0.942363	0.923316
9060	1	0.857143	1	1	0.90625	0.965035	0.923077	0.942363	0.923316
9070	1	0.857143	1	1	0.90625	0.965035	0.923077	0.942363	0.923316
9080	1	0.857143	1	1	0.90625	0.965035	0.923077	0.942363	0.923316
9090	1	0.857143	1	1	0.90625	0.965035	0.923077	0.942363	0.923316
9100	1	0.857143	1	1	0.90625	0.965035	0.923077	0.942363	0.923316
9110	1	0.857143	1	1	0.90625	0.965035	0.923077	0.942363	0.923316
9120	1	0.857143	1	1	0.90625	0.965035	0.923077	0.942363	0.923316
9130	1	0.857143	1	1	0.90625	0.965035	0.923077	0.942363	0.923316
9140	1	0.857143	1	1	0.90625	0.965035	0.923077	0.942363	0.923316
9150	1	0.857143	1	1	0.90625	0.965035	0.923077	0.942363	0.923316
9160	1	0.857143	1	1	0.90625	0.965035	0.923077	0.942363	0.923316
9170	1	0.857143	1	1	0.90625	0.965035	0.923077	0.942363	0.923316
9180	1	0.857143	1	1	0.90625	0.965035	0.923077	0.942363	0.923316
9190	1	0.857143	1	1	0.90625	0.965035	0.923077	0.942363	0.923316
9200	1	0.857143	1	1	0.90625	0.965035	0.923077	0.942363	0.923316
9210	1	0.857143	1	1	0.90625	0.965035	0.923077	0.942363	0.923316
9220	1	0.857143	1	1	0.90625	0.965035	0.923077	0.942363	0.923316
9230	1	0.857143	1	1	0.90625	0.965035	0.923077	0.942363	0.923316
9240	1	0.857143	1	1	0.90625	0.965035	0.923077	0.942363	0.923316
9250	1	0.857143	1	1	0.90625	0.965035	0.923077	0.942363	0.923316
9260	1	0.857143	1	1	0.90625	0.965035	0.923077	0.942363	0.923316
9270	1	0.857143	1	1	0.90625	0.965035	0.923077	0.942363	0.923316
9280	1	0.857143	1	1	0.90625	0.965035	0.923077	0.942363	0.923316
9290	1	0.857143	1	1	0.90625	0.965035	0.923077	0.942363	0.923316
9300	1	0.857143	1	1	0.90625	0.972028	0.923077	0.945245	0.927262
9310	1	0.857143	1	1	0.90625	0.972028	0.923077	0.945245	0.927262
9320	1	0.857143	1	1	0.90625	0.972028	0.923077	0.945245	0.927262
9330	1	0.857143	1	1	0.90625	0.972028	0.923077	0.945245	0.927262
9340	1	0.857143	1	1	0.90625	0.972028	0.923077	0.945245	0.927262
9350	1	0.857143	1	1	0.90625	0.965035	0.923077	0.942363	0.923316
9360	1	0.857143	1	1	0.90625	0.972028	0.923077	0.945245	0.927262
9370	1	0.857143	1	1	0.90625	0.972028	0.923077	0.945245	0.927262
9380	1	0.857143	1	1	0.90625	0.972028	0.923077	0.945245	0.927262
9390	1	0.857143	1	1	0.90625	0.972028	0.923077	0.945245	0.927262
9400	1	0.857143	1	1	0.90625	0.972028	0.923077	0.945245	0.927262
9410	1	0.857143	1	1	0.90625	0.972028	0.923077	0.945245	0.927262
9420	1	0.857143	1	1	0.90625	0.972028	0.923077	0.945245	0.927262
9430	1	0.857143	1	1	0.90625	0.972028	0.923077	0.945245	0.927262
9440	1	0.857143	1	1	0.90625	0.972028	0.923077	0.945245	0.927262
9450	1	0.857143	1	1	0.90625	0.972028	0.923077	0.945245	0.927262
9460	1	0.857143	1	1	0.90625	0.972028	0.923077	0.945245	0.927262
9470	1	0.875	1	1	0.90625	0.972028	0.923077	0.948127	0.93106
9480	1	0.875	1	1	0.90625	0.972028	0.923077	0.948127	0.93106
9490	1	0.875	1	1	0.90625	0.972028	0.923077	0.948127	0.93106
9500	1	0.875	1	1	0.90625	0.972028	0.923077	0.948127	0.93106
9510	1	0.875	1	1	0.90625	0.965035	0.923077	0.945245	0.927137
9520	1	0.857143	1	1	0.90625	0.965035	0.923077	0.942363	0.923316
9530	1	0.875	1	1	0.90625	0.972028	0.923077	0.948127	0.93106
9540	1	0.875	1	1	0.90625	0.972028	0.923077	0.948127	0.93106
9550	1	0.875	1	1	0.90625	0.972028	0.923077	0.948127	0.93106
9560	1	0.875	1	1	0.90625	0.972028	0.923077	0.948127	0.93106
9570	1	0.857143	1	1	0.90625	0.972028	0.923077	0.945245	0.927262
9580	1	0.875	1	1	0.90625	0.972028	0.923077	0.948127	0.93106
9590	1	0.875	1	1	0.90625	0.972028	0.923077	0.948127	0.93106
9600	1	0.875	1	1	0.90625	0.972028	0.923077	0.948127	0.93106
9610	1	0.875	1	1	0.90625	0.972028	0.923077	0.948127	0.93106
9620	1	0.875	1	1	0.90625	0.972028	0.923077	0.948127	0.93106
9630	1	0.875	1	1	0.90625	0.972028	0.923077	0.948127	0.93106
9640	1	0.875	1	1	0.90625	0.972028	0.923077	0.948127	0.93106
9650	1	0.875	1	1	0.90625	0.965035	0.923077	0.945245	0.927137
9660	1	0.875	1	1	0.90625	0.965035	0.923077	0.945245	0.927137
9670	1	0.875	1	1	0.90625	0.965035	0.923077	0.945245	0.927137
9680	1	0.875	1	1	0.90625	0.965035	0.923077	0.945245	0.927137
9690	1	0.875	1	1	0.90625	0.965035	0.923077	0.945245	0.927137
9700	1	0.875	1	1	0.90625	0.965035	0.923077	0.945245	0.927137
9710	1	0.875	1	1	0.90625	0.965035	0.923077	0.945245	0.927137
9720	1	0.875	1	1	0.90625	0.965035	0.923077	0.945245	0.927137
9730	1	0.875	1	1	0.90625	0.965035	0.923077	0.945245	0.927137
9740	1	0.875	1	1	0.90625	0.965035	0.923077	0.945245	0.927137
9750	1	0.875	1	1	0.90625	0.965035	0.923077	0.945245	0.927137
9760	1	0.875	1	1	0.90625	0.965035	0.923077	0.945245	0.927137
9770	1	0.875	1	1	0.90625	0.965035	0.923077	0.945245	0.927137
9780	1	0.875	1	1	0.90625	0.965035	0.923077	0.945245	0.927137
9790	1	0.875	1	1	0.90625	0.965035	0.923077	0.945245	0.927137
9800	1	0.875	1	1	0.90625	0.965035	0.923077	0.945245	0.927137
9810	1	0.875	1	1	0.90625	0.965035	0.923077	0.945245	0.927137
9820	1	0.875	1	1	0.90625	0.965035	0.923077	0.945245	0.927137
9830	1	0.875	1	1	0.90625	0.965035	0.923077	0.945245	0.927137
9840	1	0.857143	1	1	0.90625	0.965035	0.923077	0.942363	0.923316
9850	1	0.857143	1	1	0.90625	0.965035	0.923077	0.942363	0.923316
9860	1	0.857143	1	1	0.90625	0.965035	0.923077	0.942363	0.923316
9870	1	0.857143	1	1	0.90625	0.965035	0.923077	0.942363	0.923316
9880	1	0.857143	1	1	0.90625	0.965035	0.923077	0.942363	0.923316
9890	1	0.857143	1	1	0.90625	0.965035	0.923077	0.942363	0.923316
9900	1	0.857143	1	1	0.90625	0.965035	0.923077	0.942363	0.923316
9910	1	0.857143	1	1	0.90625	0.965035	0.923077	0.942363	0.923316
9920	1	0.857143	1	1	0.90625	0.965035	0.923077	0.942363	0.923316
9930	1	0.857143	1	1	0.90625	0.965035	0.923077	0.942363	0.923316
9940	1	0.857143	1	1	0.90625	0.965035	0.923077	0.942363	0.923316
9950	1	0.857143	1	1	0.90625	0.965035	0.923077	0.942363	0.923316
9960	1	0.857143	1	1	0.90625	0.965035	0.923077	0.942363	0.923316
9970	1	0.857143	1	1	0.90625	0.965035	0.923077	0.942363	0.923316
9980	1	0.857143	1	1	0.90625	0.965035	0.923077	0.942363	0.923316
9990	1	0.857143	1	1	0.90625	0.965035	0.923077	0.942363	0.923316
10000	1	0.857143	1	1	0.90625	0.965035	0.923077	0.942363	0.923316
10010	1	0.857143	1	1	0.90625	0.965035	0.923077	0.942363	0.923316
10020	1	0.857143	1	1	0.90625	0.965035	0.923077	0.942363	0.923316
10030	1	0.857143	1	1	0.90625	0.965035	0.923077	0.942363	0.923316
10040	1	0.857143	1	1	0.90625	0.965035	0.923077	0.942363	0.923316
10050	1	0.857143	1	1	0.90625	0.965035	0.923077	0.942363	0.923316
10060	1	0.857143	1	1	0.90625	0.965035	0.923077	0.942363	0.923316
10070	1	0.857143	1	1	0.90625	0.965035	0.923077	0.942363	0.923316
10080	1	0.857143	1	1	0.90625	0.965035	0.923077	0.942363	0.923316
10090	1	0.857143	1	1	0.90625	0.965035	0.923077	0.942363	0.923316
10100	1	0.857143	1	1	0.90625	0.965035	0.923077	0.942363	0.923316
10110	1	0.857143	1	1	0.90625	0.965035	0.923077	0.942363	0.923316
10120	1	0.857143	1	1	0.90625	0.965035	0.923077	0.942363	0.923316
10130	1	0.857143	1	1	0.90625	0.965035	0.923077	0.942363	0.923316
10140	1	0.857143	1	1	0.90625	0.965035	0.923077	0.942363	0.923316
10150	1	0.857143	1	1	0.90625	0.965035	0.923077	0.942363	0.923316
10160	1	0.857143	1	1	0.90625	0.965035	0.923077	0.942363	0.923316
10170	1	0.857143	1	1	0.90625	0.965035	0.923077	0.942363	0.923316
10180	1	0.857143	1	1	0.90625	0.965035	0.923077	0.942363	0.923316
10190	1	0.857143	1	1	0.90625	0.965035	0.923077	0.942363	0.923316
10200	1	0.857143	1	1	0.90625	0.965035	0.923077	0.942363	0.923316
10210	1	0.857143	1	1	0.90625	0.965035	0.923077	0.942363	0.923316
10220	1	0.857143	1	1	0.90625	0.965035	0.923077	0.942363	0.923316
10230	1	0.857143	1	1	0.90625	0.965035	0.923077	0.942363	0.923316
10240	1	0.857143	1	1	0.90625	0.965035	0.923077	0.942363	0.923316
10250	1	0.857143	1	1	0.90625	0.965035	0.923077	0.942363	0.923316
10260	1	0.857143	1	1	0.90625	0.965035	0.923077	0.942363	0.923316
10270	1	0.857143	1	1	0.90625	0.965035	0.923077	0.942363	0.923316
10280	1	0.857143	1	1	0.90625	0.965035	0.923077	0.942363	0.923316
10290	1	0.857143	1	1	0.90625	0.965035	0.923077	0.942363	0.923316
10300	1	0.857143	1	1	0.90625	0.965035	0.923077	0.942363	0.923316
10310	1	0.857143	1	1	0.90625	0.965035	0.923077	0.942363	0.923316
10320	1	0.857143	1	1	0.90625	0.965035	0.923077	0.942363	0.923316
10330	1	0.857143	1	1	0.90625	0.965035	0.923077	0.942363	0.923316
10340	1	0.857143	1	1	0.90625	0.965035	0.923077	0.942363	0.923316
10350	1	0.857143	1	1	0.90625	0.965035	0.923077	0.942363	0.923316
10360	1	0.857143	1	1	0.90625	0.965035	0.923077	0.942363	0.923316
10370	1	0.857143	1	1	0.90625	0.965035	0.923077	0.942363	0.923316
10380	1	0.857143	1	1	0.90625	0.965035	0.923077	0.942363	0.923316
10390	1	0.857143	1	1	0.90625	0.965035	0.923077	0.942363	0.923316
10400	1	0.857143	1	1	0.90625	0.965035	0.923077	0.942363	0.923316
10410	1	0.857143	1	1	0.90625	0.965035	0.923077	0.942363	0.923316
10420	1	0.857143	1	1	0.90625	0.965035	0.923077	0.942363	0.923316
10430	1	0.857143	1	1	0.90625	0.965035	0.923077	0.942363	0.923316
10440	1	0.857143	1	1	0.90625	0.965035	0.923077	0.942363	0.923316
10450	1	0.857143	1	1	0.90625	0.965035	0.923077	0.942363	0.923316
10460	1	0.857143	1	1	0.90625	0.965035	0.923077	0.942363	0.923316
10470	1	0.857143	1	1	0.90625	0.965035	0.923077	0.942363	0.923316
10480	1	0.857143	1	1	0.90625	0.965035	0.923077	0.942363	0.923316
10490	1	0.857143	1	1	0.90625	0.965035	0.923077	0.942363	0.923316
10500	1	0.857143	1	1	0.90625	0.965035	0.923077	0.942363	0.923316
10510	1	0.857143	1	1	0.90625	0.965035	0.923077	0.942363	0.923316
10520	1	0.857143	1	1	0.90625	0.965035	0.923077	0.942363	0.923316
10530	1	0.857143	1	1	0.90625	0.965035	0.923077	0.942363	0.923316
10540	1	0.857143	1	1	0.90625	0.965035	0.923077	0.942363	0.923316
10550	1	0.857143	1	1	0.90625	0.965035	0.923077	0.942363	0.923316
10560	1	0.857143	1	1	0.90625	0.965035	0.923077	0.942363	0.923316
10570	1	0.857143	1	1	0.90625	0.965035	0.923077	0.942363	0.923316
10580	1	0.857143	1	1	0.90625	0.965035	0.923077	0.942363	0.923316
10590	1	0.857143	1	1	0.90625	0.965035	0.923077	0.942363	0.923316
10600	1	0.857143	1	1	0.90625	0.965035	0.923077	0.942363	0.923316
10610	1	0.857143	1	1	0.90625	0.965035	0.923077	0.942363	0.923316
10620	1	0.857143	1	1	0.90625	0.965035	0.923077	0.942363	0.923316
10630	1	0.857143	1	1	0.90625	0.965035	0.923077	0.942363	0.923316
10640	1	0.857143	1	1	0.90625	0.965035	0.923077	0.942363	0.923316
10650	1	0.857143	1	1	0.90625	0.965035	0.923077	0.942363	0.923316
10660	1	0.857143	1	1	0.90625	0.965035	0.923077	0.942363	0.923316
10670	1	0.857143	1	1	0.90625	0.965035	0.923077	0.942363	0.923316
10680	1	0.857143	1	1	0.90625	0.965035	0.923077	0.942363	0.923316
10690	1	0.857143	1	1	0.90625	0.965035	0.923077	0.942363	0.923316
10700	1	0.857143	1	1	0.90625	0.965035	0.923077	0.942363	0.923316
10710	1	0.857143	1	1	0.90625	0.965035	0.923077	0.942363	0.923316
10720	1	0.857143	1	1	0.90625	0.965035	0.923077	0.942363	0.923316
10730	1	0.857143	1	1	0.90625	0.965035	0.923077	0.942363	0.923316
10740	1	0.857143	1	1	0.90625	0.965035	0.923077	0.942363	0.923316
10750	1	0.857143	1	1	0.90625	0.965035	0.923077	0.942363	0.923316
10760	1	0.857143	1	1	0.90625	0.965035	0.923077	0.942363	0.923316
10770	1	0.857143	1	1	0.90625	0.965035	0.923077	0.942363	0.923316
10780	1	0.857143	1	1	0.90625	0.965035	0.923077	0.942363	0.923316
10790	1	0.857143	1	1	0.90625	0.965035	0.923077	0.942363	0.923316
10800	1	0.857143	1	1	0.90625	0.965035	0.923077	0.942363	0.923316
10810	1	0.857143	1	1	0.90625	0.965035	0.923077	0.942363	0.923316
10820	1	0.857143	1	1	0.90625	0.965035	0.923077	0.942363	0.923316
10830	1	0.857143	1	1	0.90625	0.965035	0.923077	0.942363	0.923316
10840	1	0.857143	1	1	0.90625	0.965035	0.923077	0.942363	0.923316
10850	1	0.857143	1	1	0.90625	0.965035	0.923077	0.942363	0.923316
10860	1	0.857143	1	1	0.90625	0.965035	0.923077	0.942363	0.923316
10870	1	0.857143	1	1	0.90625	0.965035	0.923077	0.942363	0.923316
10880	1	0.857143	1	1	0.90625	0.965035	0.923077	0.942363	0.923316
10890	1	0.857143	1	1	0.90625	0.965035	0.923077	0.942363	0.923316
10900	1	0.857143	1	1	0.90625	0.965035	0.923077	0.942363	0.923316
10910	1	0.857143	1	1	0.90625	0.965035	0.923077	0.942363	0.923316
10920	1	0.857143	1	1	0.90625	0.965035	0.923077	0.942363	0.923316
10930	1	0.857143	1	1	0.90625	0.965035	0.923077	0.942363	0.923316
10940	1	0.857143	1	1	0.90625	0.965035	0.923077	0.942363	0.923316
10950	1	0.857143	1	1	0.90625	0.965035	0.923077	0.942363	0.923316
10960	1	0.857143	1	1	0.90625	0.965035	0.923077	0.942363	0.923316
10970	1	0.857143	1	1	0.90625	0.965035	0.923077	0.942363	0.923316
10980	1	0.857143	1	1	0.90625	0.965035	0.923077	0.942363	0.923316
10990	1	0.857143	1	1	0.90625	0.965035	0.923077	0.942363	0.923316
11000	1	0.857143	1	1	0.90625	0.965035	0.923077	0.942363	0.923316
11010	1	0.857143	1	1	0.90625	0.965035	0.923077	0.942363	0.923316
11020	1	0.857143	1	1	0.90625	0.965035	0.923077	0.942363	0.923316
11030	1	0.857143	1	1	0.90625	0.965035	0.923077	0.942363	0.923316
11040	1	0.857143	1	1	0.90625	0.965035	0.923077	0.942363	0.923316
11050	1	0.857143	1	1	0.90625	0.965035	0.923077	0.942363	0.923316
11060	1	0.857143	1	1	0.90625	0.965035	0.923077	0.942363	0.923316
11070	1	0.857143	1	1	0.90625	0.965035	0.923077	0.942363	0.923316
11080	1	0.857143	1	1	0.90625	0.965035	0.923077	0.942363	0.923316
11090	1	0.857143	1	1	0.90625	0.965035	0.923077	0.942363	0.923316
11100	1	0.857143	1	1	0.90625	0.965035	0.923077	0.942363	0.923316
11110	1	0.857143	1	1	0.90625	0.965035	0.923077	0.942363	0.923316
11120	1	0.857143	1	1	0.90625	0.965035	0.923077	0.942363	0.923316
11130	1	0.857143	1	1	0.90625	0.965035	0.923077	0.942363	0.923316
11140	1	0.857143	1	1	0.90625	0.965035	0.923077	0.942363	0.923316
11150	1	0.857143	1	1	0.90625	0.965035	0.923077	0.942363	0.923316
11160	1	0.857143	1	1	0.90625	0.965035	0.923077	0.942363	0.923316
11170	1	0.857143	1	1	0.90625	0.965035	0.923077	0.942363	0.923316
11180	1	0.857143	1	1	0.90625	0.965035	0.923077	0.942363	0.923316
11190	1	0.857143	1	1	0.90625	0.965035	0.923077	0.942363	0.923316
11200	1	0.857143	1	1	0.90625	0.965035	0.923077	0.942363	0.923316
11210	1	0.857143	1	1	0.90625	0.965035	0.923077	0.942363	0.923316
11220	1	0.857143	1	1	0.90625	0.958042	0.923077	0.939481	0.919364
11230	1	0.857143	1	1	0.90625	0.958042	0.923077	0.939481	0.919364
11240	1	0.857143	1	1	0.90625	0.958042	0.923077	0.939481	0.919364
11250	1	0.857143	1	1	0.90625	0.958042	0.923077	0.939481	0.919364
11260	1	0.857143	1	1	0.90625	0.965035	0.923077	0.942363	0.923316
11270	1	0.857143	1	1	0.90625	0.958042	0.923077	0.939481	0.919364
11280	1	0.857143	1	1	0.90625	0.965035	0.923077	0.942363	0.923316
11290	1	0.857143	1	1	0.90625	0.965035	0.923077	0.942363	0.923316
11300	1	0.857143	1	1	0.90625	0.965035	0.923077	0.942363	0.923316
11310	1	0.857143	1	1	0.90625	0.972028	0.923077	0.945245	0.927262
11320	1	0.857143	1	1	0.90625	0.972028	0.923077	0.945245	0.927262
11330	1	0.857143	1	1	0.90625	0.965035	0.923077	0.942363	0.923316
11340	1	0.857143	1	1	0.90625	0.972028	0.923077	0.945245	0.927262
11350	1	0.857143	1	1	0.90625	0.965035	0.923077	0.942363	0.923316
11360	1	0.857143	1	1	0.90625	0.965035	0.923077	0.942363	0.923316
11370	1	0.857143	1	1	0.90625	0.965035	0.923077	0.942363	0.923316
11380	1	0.857143	1	1	0.90625	0.965035	0.923077	0.942363	0.923316
11390	1	0.857143	1	1	0.90625	0.965035	0.923077	0.942363	0.923316
11400	1	0.857143	1	1	0.90625	0.965035	0.923077	0.942363	0.923316
11410	1	0.857143	1	1	0.90625	0.965035	0.923077	0.942363	0.923316
11420	1	0.857143	1	1	0.90625	0.965035	0.923077	0.942363	0.923316
11430	1	0.857143	1	1	0.90625	0.965035	0.923077	0.942363	0.923316
11440	1	0.857143	1	1	0.90625	0.972028	0.923077	0.945245	0.927262
11450	1	0.857143	1	1	0.90625	0.965035	0.923077	0.942363	0.923316
11460	1	0.857143	1	1	0.90625	0.965035	0.923077	0.942363	0.923316
11470	1	0.857143	1	1	0.90625	0.972028	0.923077	0.945245	0.927262
11480	1	0.857143	1	1	0.90625	0.965035	0.923077	0.942363	0.92329
11490	1	0.857143	1	1	0.90625	0.958042	0.923077	0.939481	0.919364
11500	1	0.857143	1	1	0.90625	0.965035	0.923077	0.942363	0.923316
11510	1	0.857143	1	1	0.90625	0.965035	0.923077	0.942363	0.92329
11520	1	0.857143	1	1	0.90625	0.972028	0.923077	0.945245	0.927262
11530	1	0.857143	1	1	0.90625	0.965035	0.923077	0.942363	0.92329
11540	1	0.857143	1	1	0.90625	0.972028	0.923077	0.945245	0.927262
11550	1	0.857143	1	1	0.90625	0.972028	0.923077	0.945245	0.927262
11560	1	0.857143	1	1	0.90625	0.972028	0.923077	0.945245	0.927262
11570	1	0.857143	1	1	0.90625	0.972028	0.923077	0.945245	0.927262
11580	1	0.857143	1	1	0.90625	0.972028	0.923077	0.945245	0.927262
11590	1	0.857143	1	1	0.90625	0.972028	0.923077	0.945245	0.927262
11600	1	0.857143	1	1	0.90625	0.972028	0.923077	0.945245	0.927262
11610	1	0.857143	1	1	0.90625	0.972028	0.923077	0.945245	0.927262
11620	1	0.857143	1	1	0.90625	0.972028	0.923077	0.945245	0.927262
11630	1	0.857143	1	1	0.90625	0.972028	0.923077	0.945245	0.927262
11640	1	0.857143	1	1	0.90625	0.972028	0.923077	0.945245	0.927262
11650	1	0.857143	1	1	0.90625	0.972028	0.923077	0.945245	0.927262
11660	1	0.857143	1	1	0.90625	0.972028	0.923077	0.945245	0.927262
11670	1	0.857143	1	1	0.90625	0.972028	0.923077	0.945245	0.927262
11680	1	0.857143	1	1	0.90625	0.972028	0.923077	0.945245	0.927262
11690	1	0.857143	1	1	0.90625	0.972028	0.923077	0.945245	0.927262
11700	1	0.857143	1	1	0.90625	0.979021	0.923077	0.948127	0.931239
11710	1	0.857143	1	1	0.90625	0.972028	0.923077	0.945245	0.927262
11720	1	0.857143	1	1	0.90625	0.972028	0.923077	0.945245	0.927262
11730	1	0.857143	1	1	0.90625	0.972028	0.923077	0.945245	0.927262
11740	1	0.857143	1	1	0.90625	0.972028	0.923077	0.945245	0.927262
11750	1	0.857143	1	1	0.90625	0.972028	0.923077	0.945245	0.927262
11760	1	0.857143	1	1	0.90625	0.972028	0.923077	0.945245	0.927262
11770	1	0.857143	1	1	0.90625	0.972028	0.923077	0.945245	0.927262
11780	1	0.857143	1	1	0.90625	0.972028	0.923077	0.945245	0.927262
11790	1	0.857143	1	1	0.90625	0.972028	0.923077	0.945245	0.927262
11800	1	0.857143	1	1	0.90625	0.972028	0.923077	0.945245	0.927262
11810	1	0.857143	1	1	0.90625	0.972028	0.923077	0.945245	0.927262
11820	1	0.857143	1	1	0.90625	0.972028	0.923077	0.945245	0.927262
11830	1	0.857143	1	1	0.90625	0.972028	0.923077	0.945245	0.927262
11840	1	0.857143	1	1	0.90625	0.972028	0.923077	0.945245	0.927262
11850	1	0.857143	1	1	0.90625	0.972028	0.923077	0.945245	0.927262
11860	1	0.857143	1	1	0.90625	0.972028	0.923077	0.945245	0.927262
11870	1	0.857143	1	1	0.90625	0.965035	0.923077	0.942363	0.923316
11880	1	0.857143	1	1	0.90625	0.965035	0.923077	0.942363	0.923316
11890	1	0.839286	1	1	0.90625	0.965035	0.923077	0.939481	0.91951
11900	1	0.839286	1	1	0.90625	0.965035	0.923077	0.939481	0.91951
11910	1	0.839286	1	1	0.90625	0.965035	0.923077	0.939481	0.91951
11920	1	0.839286	1	1	0.90625	0.965035	0.923077	0.939481	0.91951
11930	1	0.839286	1	1	0.90625	0.972028	0.923077	0.942363	0.923478
11940	1	0.839286	1	1	0.90625	0.972028	0.923077	0.942363	0.923478
11950	1	0.839286	1	1	0.90625	0.972028	0.923077	0.942363	0.923478
11960	1	0.839286	1	1	0.90625	0.972028	0.923077	0.942363	0.923478
11970	1	0.839286	1	1	0.90625	0.972028	0.923077	0.942363	0.923478
11980	1	0.839286	1	1	0.90625	0.965035	0.923077	0.939481	0.91951
11990	1	0.839286	1	1	0.90625	0.972028	0.923077	0.942363	0.923478
12000	1	0.839286	1	1	0.90625	0.972028	0.923077	0.942363	0.923478
12010	1	0.839286	1	1	0.90625	0.965035	0.923077	0.939481	0.91951
12020	1	0.839286	1	1	0.90625	0.965035	0.923077	0.939481	0.91951
12030	1	0.839286	1	1	0.90625	0.965035	0.923077	0.939481	0.91951
12040	1	0.839286	1	1	0.90625	0.958042	0.923077	0.936599	0.915573
12050	1	0.839286	1	1	0.90625	0.958042	0.923077	0.936599	0.915573
12060	1	0.839286	1	1	0.90625	0.958042	0.923077	0.936599	0.915573
12070	1	0.839286	1	1	0.90625	0.958042	0.923077	0.936599	0.915573
12080	1	0.821429	1	1	0.90625	0.965035	0.923077	0.936599	0.915716
12090	1	0.821429	1	1	0.90625	0.965035	0.923077	0.936599	0.915716
12100	1	0.821429	1	1	0.90625	0.965035	0.923077	0.936599	0.915716
12110	1	0.821429	1	1	0.90625	0.965035	0.923077	0.936599	0.915716
12120	1	0.821429	1	1	0.90625	0.965035	0.923077	0.936599	0.915716
12130	1	0.821429	1	1	0.90625	0.965035	0.923077	0.936599	0.915716
12140	1	0.821429	1	1	0.90625	0.965035	0.923077	0.936599	0.915716
12150	1	0.821429	1	1	0.90625	0.965035	0.923077	0.936599	0.915716
12160	1	0.821429	1	1	0.90625	0.965035	0.923077	0.936599	0.915716
12170	1	0.821429	1	1	0.90625	0.965035	0.923077	0.936599	0.915716
12180	1	0.821429	1	1	0.90625	0.965035	0.923077	0.936599	0.915716
12190	1	0.821429	1	1	0.90625	0.965035	0.923077	0.936599	0.915716
12200	1	0.821429	1	1	0.90625	0.965035	0.923077	0.936599	0.915716
12210	1	0.821429	1	1	0.90625	0.965035	0.923077	0.936599	0.915716
12220	1	0.821429	1	1	0.90625	0.965035	0.923077	0.936599	0.915716
12230	1	0.821429	1	1	0.90625	0.965035	0.923077	0.936599	0.915716
12240	1	0.821429	1	1	0.90625	0.965035	0.923077	0.936599	0.915716
12250	1	0.821429	1	1	0.90625	0.965035	0.923077	0.936599	0.915716
12260	1	0.839286	1	1	0.90625	0.965035	0.923077	0.939481	0.91951
12270	1	0.839286	1	1	0.90625	0.965035	0.923077	0.939481	0.91951
12280	1	0.839286	1	1	0.90625	0.965035	0.923077	0.939481	0.91951
12290	1	0.839286	1	1	0.90625	0.965035	0.923077	0.939481	0.91951
12300	1	0.839286	1	1	0.90625	0.965035	0.923077	0.939481	0.91951
12310	1	0.839286	1	1	0.90625	0.965035	0.923077	0.939481	0.91951
12320	1	0.839286	1	1	0.90625	0.965035	0.923077	0.939481	0.91951
12330	1	0.839286	1	1	0.90625	0.965035	0.923077	0.939481	0.91951
12340	1	0.839286	1	1	0.90625	0.965035	0.923077	0.939481	0.91951
12350	1	0.839286	1	1	0.90625	0.965035	0.923077	0.939481	0.91951
12360	1	0.839286	1	1	0.90625	0.965035	0.923077	0.939481	0.91951
12370	1	0.839286	1	1	0.90625	0.965035	0.923077	0.939481	0.91951
12380	1	0.839286	1	1	0.90625	0.965035	0.923077	0.939481	0.91951
12390	1	0.839286	1	1	0.90625	0.965035	0.923077	0.939481	0.91951
12400	1	0.839286	1	1	0.90625	0.965035	0.923077	0.939481	0.91951
12410	1	0.839286	1	1	0.90625	0.965035	0.923077	0.939481	0.91951
12420	1	0.839286	1	1	0.90625	0.965035	0.923077	0.939481	0.91951
12430	1	0.839286	1	1	0.90625	0.965035	0.923077	0.939481	0.91951
12440	1	0.839286	1	1	0.90625	0.965035	0.923077	0.939481	0.91951
12450	1	0.839286	1	1	0.90625	0.965035	0.923077	0.939481	0.91951
12460	1	0.839286	1	1	0.90625	0.965035	0.923077	0.939481	0.91951
12470	1	0.839286	1	1	0.90625	0.965035	0.923077	0.939481	0.91951
12480	1	0.839286	1	1	0.90625	0.965035	0.923077	0.939481	0.91951
12490	1	0.839286	1	1	0.90625	0.965035	0.923077	0.939481	0.91951
12500	1	0.839286	1	1	0.90625	0.965035	0.923077	0.939481	0.91951
12510	1	0.839286	1	1	0.90625	0.965035	0.923077	0.939481	0.91951
12520	1	0.839286	1	1	0.90625	0.965035	0.923077	0.939481	0.91951
12530	1	0.839286	1	1	0.90625	0.965035	0.923077	0.939481	0.91951
12540	1	0.839286	1	1	0.90625	0.965035	0.923077	0.939481	0.91951
12550	1	0.839286	1	1	0.90625	0.965035	0.923077	0.939481	0.91951
12560	1	0.839286	1	1	0.90625	0.965035	0.923077	0.939481	0.91951
12570	1	0.839286	1	1	0.90625	0.965035	0.923077	0.939481	0.91951
12580	1	0.839286	1	1	0.90625	0.965035	0.923077	0.939481	0.91951
12590	1	0.839286	1	1	0.90625	0.965035	0.923077	0.939481	0.91951
12600	1	0.839286	1	1	0.90625	0.965035	0.923077	0.939481	0.91951
12610	1	0.839286	1	1	0.90625	0.965035	0.923077	0.939481	0.91951
12620	1	0.839286	1	1	0.90625	0.965035	0.923077	0.939481	0.91951
12630	1	0.839286	1	1	0.90625	0.965035	0.923077	0.939481	0.91951
12640	1	0.839286	1	1	0.90625	0.965035	0.923077	0.939481	0.91951
12650	1	0.839286	1	1	0.90625	0.965035	0.923077	0.939481	0.91951
12660	1	0.839286	1	1	0.90625	0.965035	0.923077	0.939481	0.91951
12670	1	0.839286	1	1	0.90625	0.965035	0.923077	0.939481	0.91951
12680	1	0.839286	1	1	0.90625	0.965035	0.923077	0.939481	0.91951
12690	1	0.839286	1	1	0.90625	0.965035	0.923077	0.939481	0.91951
12700	1	0.821429	1	1	0.90625	0.965035	0.923077	0.936599	0.915716
12710	1	0.821429	1	1	0.90625	0.965035	0.923077	0.936599	0.915716
12720	1	0.821429	1	1	0.90625	0.965035	0.923077	0.936599	0.915716
12730	1	0.821429	1	1	0.90625	0.965035	0.923077	0.936599	0.915716
12740	1	0.821429	1	1	0.90625	0.965035	0.923077	0.936599	0.915716
12750	1	0.821429	1	1	0.90625	0.965035	0.923077	0.936599	0.915716
12760	1	0.821429	1	1	0.90625	0.965035	0.923077	0.936599	0.915716
12770	1	0.821429	1	1	0.90625	0.965035	0.923077	0.936599	0.915716
12780	1	0.821429	1	1	0.90625	0.965035	0.923077	0.936599	0.915716
12790	1	0.821429	1	1	0.90625	0.965035	0.923077	0.936599	0.915716
12800	1	0.821429	1	1	0.90625	0.965035	0.923077	0.936599	0.915716
12810	1	0.821429	1	1	0.90625	0.965035	0.923077	0.936599	0.915716
12820	1	0.821429	1	1	0.90625	0.965035	0.923077	0.936599	0.915716
12830	1	0.821429	1	1	0.90625	0.965035	0.923077	0.936599	0.915716
12840	1	0.821429	1	1	0.90625	0.965035	0.923077	0.936599	0.915716
12850	1	0.821429	1	1	0.90625	0.965035	0.923077	0.936599	0.915716
12860	1	0.821429	1	1	0.90625	0.965035	0.923077	0.936599	0.915716
12870	1	0.821429	1	1	0.90625	0.965035	0.923077	0.936599	0.915716
12880	1	0.821429	1	1	0.90625	0.965035	0.923077	0.936599	0.915716
12890	1	0.821429	1	1	0.90625	0.965035	0.923077	0.936599	0.915716
12900	1	0.821429	1	1	0.90625	0.965035	0.923077	0.936599	0.915716
12910	1	0.821429	1	1	0.90625	0.965035	0.923077	0.936599	0.915716
12920	1	0.821429	1	1	0.90625	0.965035	0.923077	0.936599	0.915716
12930	1	0.821429	1	1	0.90625	0.965035	0.923077	0.936599	0.915716
12940	1	0.821429	1	1	0.90625	0.965035	0.923077	0.936599	0.915716
12950	1	0.821429	1	1	0.90625	0.965035	0.923077	0.936599	0.915716
12960	1	0.821429	1	1	0.90625	0.965035	0.923077	0.936599	0.915716
12970	1	0.821429	1	1	0.90625	0.965035	0.923077	0.936599	0.915716
12980	1	0.821429	1	1	0.90625	0.965035	0.923077	0.936599	0.915716
12990	1	0.821429	1	1	0.90625	0.965035	0.923077	0.936599	0.915716
13000	1	0.821429	1	1	0.90625	0.965035	0.923077	0.936599	0.915716
13010	1	0.821429	1	1	0.90625	0.965035	0.923077	0.936599	0.915716
13020	1	0.821429	1	1	0.90625	0.965035	0.923077	0.936599	0.915716
13030	1	0.821429	1	1	0.90625	0.965035	0.923077	0.936599	0.915716
13040	1	0.821429	1	1	0.90625	0.965035	0.923077	0.936599	0.915716
13050	1	0.821429	1	1	0.90625	0.965035	0.923077	0.936599	0.915716
13060	1	0.821429	1	1	0.90625	0.965035	0.923077	0.936599	0.915716
13070	1	0.821429	1	1	0.90625	0.965035	0.923077	0.936599	0.915716
13080	1	0.821429	1	1	0.90625	0.965035	0.923077	0.936599	0.915716
13090	1	0.821429	1	1	0.90625	0.965035	0.923077	0.936599	0.915716
13100	1	0.821429	1	1	0.90625	0.965035	0.923077	0.936599	0.915716
13110	1	0.821429	1	1	0.90625	0.965035	0.923077	0.936599	0.915716
13120	1	0.821429	1	1	0.90625	0.965035	0.923077	0.936599	0.915716
13130	1	0.821429	1	1	0.90625	0.965035	0.923077	0.936599	0.915716
13140	1	0.821429	1	1	0.90625	0.965035	0.923077	0.936599	0.915716
13150	1	0.821429	1	1	0.90625	0.965035	0.923077	0.936599	0.915716
13160	1	0.821429	1	1	0.90625	0.965035	0.923077	0.936599	0.915716
13170	1	0.821429	1	1	0.90625	0.965035	0.923077	0.936599	0.915716
13180	1	0.839286	1	1	0.90625	0.965035	0.923077	0.939481	0.91951
13190	1	0.821429	1	1	0.90625	0.965035	0.923077	0.936599	0.915716
13200	1	0.821429	1	1	0.90625	0.965035	0.923077	0.936599	0.915716
13210	1	0.821429	1	1	0.90625	0.965035	0.923077	0.936599	0.915716
13220	1	0.821429	1	1	0.90625	0.965035	0.923077	0.936599	0.915716
13230	1	0.821429	1	1	0.90625	0.965035	0.923077	0.936599	0.915716
13240	1	0.821429	1	1	0.90625	0.965035	0.923077	0.936599	0.915716
13250	1	0.821429	1	1	0.90625	0.965035	0.923077	0.936599	0.915716
13260	1	0.821429	1	1	0.90625	0.965035	0.923077	0.936599	0.915716
13270	1	0.821429	1	1	0.90625	0.965035	0.923077	0.936599	0.915716
13280	1	0.821429	1	1	0.90625	0.965035	0.923077	0.936599	0.915716
13290	1	0.839286	1	1	0.90625	0.965035	0.923077	0.939481	0.91951
13300	1	0.839286	1	1	0.90625	0.965035	0.923077	0.939481	0.91951
13310	1	0.839286	1	1	0.90625	0.965035	0.923077	0.939481	0.91951
13320	1	0.821429	1	1	0.90625	0.965035	0.923077	0.936599	0.915716
13330	1	0.821429	1	1	0.90625	0.965035	0.923077	0.936599	0.915716
13340	1	0.821429	1	1	0.90625	0.965035	0.923077	0.936599	0.915716
13350	1	0.821429	1	1	0.90625	0.965035	0.923077	0.936599	0.915716
13360	1	0.821429	1	1	0.90625	0.965035	0.923077	0.936599	0.915716
13370	1	0.821429	1	1	0.90625	0.965035	0.923077	0.936599	0.915716
13380	1	0.821429	1	1	0.90625	0.965035	0.923077	0.936599	0.915716
13390	1	0.821429	1	1	0.90625	0.965035	0.923077	0.936599	0.915716
13400	1	0.821429	1	1	0.90625	0.965035	0.923077	0.936599	0.915716
13410	1	0.821429	1	1	0.90625	0.972028	0.923077	0.939481	0.919706
13420	1	0.821429	1	1	0.90625	0.972028	0.923077	0.939481	0.919706
13430	1	0.821429	1	1	0.90625	0.972028	0.923077	0.939481	0.919706
13440	1	0.821429	1	1	0.90625	0.972028	0.923077	0.939481	0.919706
13450	1	0.821429	1	1	0.90625	0.965035	0.923077	0.936599	0.915716
13460	1	0.821429	1	1	0.90625	0.965035	0.923077	0.936599	0.915716
13470	1	0.821429	1	1	0.90625	0.965035	0.923077	0.936599	0.915716
13480	1	0.821429	1	1	0.90625	0.965035	0.923077	0.936599	0.915716
13490	1	0.821429	1	1	0.90625	0.965035	0.923077	0.936599	0.915716
13500	1	0.821429	1	1	0.90625	0.965035	0.923077	0.936599	0.915716
13510	1	0.821429	1	1	0.90625	0.965035	0.923077	0.936599	0.915716
13520	1	0.821429	1	1	0.90625	0.965035	0.923077	0.936599	0.915716
13530	1	0.821429	1	1	0.90625	0.965035	0.923077	0.936599	0.915716
13540	1	0.821429	1	1	0.90625	0.965035	0.923077	0.936599	0.915716
13550	1	0.821429	1	1	0.90625	0.965035	0.923077	0.936599	0.915716
13560	1	0.821429	1	1	0.90625	0.965035	0.923077	0.936599	0.915716
13570	1	0.821429	1	1	0.90625	0.965035	0.923077	0.936599	0.915716
13580	1	0.821429	1	1	0.90625	0.965035	0.923077	0.936599	0.915716
13590	1	0.821429	1	1	0.90625	0.965035	0.923077	0.936599	0.915716
13600	1	0.821429	1	1	0.90625	0.965035	0.923077	0.936599	0.915716
13610	1	0.821429	1	1	0.90625	0.965035	0.923077	0.936599	0.915716
13620	1	0.821429	1	1	0.90625	0.965035	0.923077	0.936599	0.915716
13630	1	0.821429	1	1	0.90625	0.965035	0.923077	0.936599	0.915716
13640	1	0.821429	1	1	0.90625	0.965035	0.923077	0.936599	0.915716
13650	1	0.821429	1	1	0.90625	0.965035	0.923077	0.936599	0.915716
13660	1	0.821429	1	1	0.90625	0.965035	0.923077	0.936599	0.915716
13670	1	0.821429	1	1	0.90625	0.965035	0.923077	0.936599	0.915716
13680	1	0.821429	1	1	0.90625	0.965035	0.923077	0.936599	0.915716
13690	1	0.821429	1	1	0.90625	0.965035	0.923077	0.936599	0.915716
13700	1	0.821429	1	1	0.90625	0.965035	0.923077	0.936599	0.915716
13710	1	0.821429	1	1	0.90625	0.965035	0.923077	0.936599	0.915716
13720	1	0.821429	1	1	0.90625	0.965035	0.923077	0.936599	0.915716
13730	1	0.821429	1	1	0.90625	0.965035	0.923077	0.936599	0.915716
13740	1	0.821429	1	1	0.90625	0.965035	0.923077	0.936599	0.915716
13750	1	0.821429	1	1	0.90625	0.965035	0.923077	0.936599	0.915716
13760	1	0.821429	1	1	0.90625	0.965035	0.923077	0.936599	0.915716
13770	1	0.821429	1	1	0.90625	0.965035	0.923077	0.936599	0.915716
13780	1	0.821429	1	1	0.90625	0.965035	0.923077	0.936599	0.915716
13790	1	0.821429	1	1	0.90625	0.965035	0.923077	0.936599	0.915716
13800	1	0.821429	1	1	0.90625	0.965035	0.923077	0.936599	0.915716
13810	1	0.821429	1	1	0.90625	0.965035	0.923077	0.936599	0.915716
13820	1	0.821429	1	1	0.90625	0.965035	0.923077	0.936599	0.915716
13830	1	0.821429	1	1	0.90625	0.965035	0.923077	0.936599	0.915716
13840	1	0.821429	1	1	0.90625	0.965035	0.923077	0.936599	0.915716
13850	1	0.821429	1	1	0.90625	0.965035	0.923077	0.936599	0.915716
13860	1	0.821429	1	1	0.90625	0.965035	0.923077	0.936599	0.915716
13870	1	0.821429	1	1	0.90625	0.965035	0.923077	0.936599	0.915716
13880	1	0.821429	1	1	0.90625	0.965035	0.923077	0.936599	0.915716
13890	1	0.821429	1	1	0.90625	0.965035	0.923077	0.936599	0.915716
13900	1	0.821429	1	1	0.90625	0.965035	0.923077	0.936599	0.915716
13910	1	0.821429	1	1	0.90625	0.965035	0.923077	0.936599	0.915716
13920	1	0.821429	1	1	0.90625	0.965035	0.923077	0.936599	0.915716
13930	1	0.821429	1	1	0.90625	0.965035	0.923077	0.936599	0.915716
13940	1	0.821429	1	1	0.90625	0.965035	0.923077	0.936599	0.915716
13950	1	0.821429	1	1	0.90625	0.965035	0.923077	0.936599	0.915716
13960	1	0.821429	1	1	0.90625	0.965035	0.923077	0.936599	0.915716
13970	1	0.821429	1	1	0.90625	0.965035	0.923077	0.936599	0.915716
13980	1	0.821429	1	1	0.90625	0.965035	0.923077	0.936599	0.915716
13990	1	0.821429	1	1	0.90625	0.965035	0.923077	0.936599	0.915716
14000	1	0.821429	1	1	0.90625	0.965035	0.923077	0.936599	0.915716
14010	1	0.821429	1	1	0.90625	0.965035	0.923077	0.936599	0.915716
14020	1	0.821429	1	1	0.90625	0.965035	0.923077	0.936599	0.915716
14030	1	0.821429	1	1	0.90625	0.965035	0.923077	0.936599	0.915716
14040	1	0.821429	1	1	0.90625	0.965035	0.923077	0.936599	0.915716
14050	1	0.821429	1	1	0.90625	0.965035	0.923077	0.936599	0.915716
14060	1	0.821429	1	1	0.90625	0.965035	0.923077	0.936599	0.915716
14070	1	0.821429	1	1	0.90625	0.965035	0.923077	0.936599	0.915716
14080	1	0.821429	1	1	0.90625	0.965035	0.923077	0.936599	0.915716
14090	1	0.821429	1	1	0.90625	0.965035	0.923077	0.936599	0.915716
14100	1	0.821429	1	1	0.90625	0.965035	0.923077	0.936599	0.915716
14110	1	0.821429	1	1	0.90625	0.965035	0.923077	0.936599	0.915716
14120	1	0.821429	1	1	0.90625	0.965035	0.923077	0.936599	0.915716
14130	1	0.821429	1	1	0.90625	0.965035	0.923077	0.936599	0.915716
14140	1	0.821429	1	1	0.90625	0.965035	0.923077	0.936599	0.915716
14150	1	0.821429	1	1	0.90625	0.965035	0.923077	0.936599	0.915716
14160	1	0.821429	1	1	0.90625	0.965035	0.923077	0.936599	0.915716
14170	1	0.821429	1	1	0.90625	0.965035	0.923077	0.936599	0.915716
14180	1	0.821429	1	1	0.90625	0.965035	0.923077	0.936599	0.915716
14190	1	0.821429	1	1	0.90625	0.958042	0.923077	0.933718	0.911757
14200	1	0.821429	1	1	0.90625	0.958042	0.923077	0.933718	0.911757
14210	1	0.821429	1	1	0.90625	0.958042	0.923077	0.933718	0.911757
14220	1	0.821429	1	1	0.90625	0.965035	0.923077	0.936599	0.915716
14230	1	0.821429	1	1	0.90625	0.958042	0.923077	0.933718	0.911757
14240	1	0.821429	1	1	0.90625	0.958042	0.923077	0.933718	0.911757
14250	1	0.821429	1	1	0.90625	0.958042	0.923077	0.933718	0.911757
14260	1	0.821429	1	1	0.90625	0.958042	0.923077	0.933718	0.911757
14270	1	0.821429	1	1	0.90625	0.965035	0.923077	0.936599	0.915716
14280	1	0.821429	1	1	0.90625	0.965035	0.923077	0.936599	0.915716
14290	1	0.821429	1	1	0.90625	0.958042	0.923077	0.933718	0.911757
14300	1	0.821429	1	1	0.90625	0.958042	0.923077	0.933718	0.911757
14310	1	0.821429	1	1	0.90625	0.958042	0.923077	0.933718	0.911757
14320	1	0.821429	1	1	0.90625	0.965035	0.923077	0.936599	0.915716
14330	1	0.821429	1	1	0.90625	0.958042	0.923077	0.933718	0.911757
14340	1	0.821429	1	1	0.90625	0.958042	0.923077	0.933718	0.911757
14350	1	0.821429	1	1	0.90625	0.958042	0.923077	0.933718	0.911757
14360	1	0.821429	1	1	0.90625	0.958042	0.923077	0.933718	0.911757
14370	1	0.821429	1	1	0.90625	0.958042	0.923077	0.933718	0.911757
14380	1	0.821429	1	1	0.90625	0.958042	0.923077	0.933718	0.911757
14390	1	0.821429	1	1	0.90625	0.958042	0.923077	0.933718	0.911757
14400	1	0.821429	1	1	0.90625	0.958042	0.923077	0.933718	0.911757
14410	1	0.821429	1	1	0.90625	0.958042	0.923077	0.933718	0.911757
14420	1	0.821429	1	1	0.90625	0.958042	0.923077	0.933718	0.911757
14430	1	0.821429	1	1	0.90625	0.958042	0.923077	0.933718	0.911757
14440	1	0.821429	1	1	0.90625	0.958042	0.923077	0.933718	0.911757
14450	1	0.821429	1	1	0.90625	0.958042	0.923077	0.933718	0.911757
14460	1	0.821429	1	1	0.90625	0.958042	0.923077	0.933718	0.911757
14470	1	0.821429	1	1	0.90625	0.958042	0.923077	0.933718	0.911757
14480	1	0.821429	1	1	0.90625	0.958042	0.923077	0.933718	0.911757
14490	1	0.821429	1	1	0.90625	0.958042	0.923077	0.933718	0.911757
14500	1	0.821429	1	1	0.90625	0.958042	0.923077	0.933718	0.911757
14510	1	0.821429	1	1	0.90625	0.958042	0.923077	0.933718	0.911757
14520	1	0.821429	1	1	0.90625	0.958042	0.923077	0.933718	0.911757
14530	1	0.821429	1	1	0.90625	0.958042	0.923077	0.933718	0.911757
14540	1	0.821429	1	1	0.90625	0.958042	0.923077	0.933718	0.911757
14550	1	0.821429	1	1	0.90625	0.958042	0.923077	0.933718	0.911757
14560	1	0.821429	1	1	0.90625	0.958042	0.923077	0.933718	0.911757
14570	1	0.821429	1	1	0.90625	0.958042	0.923077	0.933718	0.911757
14580	1	0.821429	1	1	0.90625	0.958042	0.923077	0.933718	0.911757
14590	1	0.821429	1	1	0.90625	0.958042	0.923077	0.933718	0.911757
14600	1	0.821429	1	1	0.90625	0.958042	0.923077	0.933718	0.911757
14610	1	0.821429	1	1	0.90625	0.958042	0.923077	0.933718	0.911757
14620	1	0.821429	1	1	0.90625	0.958042	0.923077	0.933718	0.911757
14630	1	0.821429	1	1	0.90625	0.958042	0.923077	0.933718	0.911757
14640	1	0.821429	1	1	0.90625	0.958042	0.923077	0.933718	0.911757
14650	1	0.821429	1	1	0.90625	0.958042	0.923077	0.933718	0.911757
14660	1	0.821429	1	1	0.90625	0.958042	0.923077	0.933718	0.911757
14670	1	0.821429	1	1	0.90625	0.958042	0.923077	0.933718	0.911757
14680	1	0.821429	1	1	0.90625	0.958042	0.923077	0.933718	0.911757
14690	1	0.821429	1	1	0.90625	0.958042	0.923077	0.933718	0.911757
14700	1	0.821429	1	1	0.90625	0.958042	0.923077	0.933718	0.911757
14710	1	0.821429	1	1	0.90625	0.958042	0.923077	0.933718	0.911757
14720	1	0.821429	1	1	0.90625	0.958042	0.923077	0.933718	0.911757
14730	1	0.821429	1	1	0.90625	0.958042	0.923077	0.933718	0.911757
14740	1	0.821429	1	1	0.90625	0.958042	0.923077	0.933718	0.911757
14750	1	0.821429	1	1	0.90625	0.958042	0.923077	0.933718	0.911757
14760	1	0.821429	1	1	0.90625	0.958042	0.923077	0.933718	0.911757
14770	1	0.821429	1	1	0.90625	0.958042	0.923077	0.933718	0.911757
14780	1	0.821429	1	1	0.90625	0.958042	0.923077	0.933718	0.911757
14790	1	0.821429	1	1	0.90625	0.958042	0.923077	0.933718	0.911757
14800	1	0.821429	1	1	0.90625	0.958042	0.923077	0.933718	0.911757
14810	1	0.821429	1	1	0.90625	0.958042	0.923077	0.933718	0.911757
14820	1	0.821429	1	1	0.90625	0.958042	0.923077	0.933718	0.911757
14830	1	0.821429	1	1	0.90625	0.958042	0.923077	0.933718	0.911757
14840	1	0.821429	1	1	0.90625	0.958042	0.923077	0.933718	0.911757
14850	1	0.821429	1	1	0.90625	0.958042	0.923077	0.933718	0.911757
14860	1	0.821429	1	1	0.90625	0.958042	0.923077	0.933718	0.911757
14870	1	0.821429	1	1	0.90625	0.958042	0.923077	0.933718	0.911757
14880	1	0.821429	1	1	0.90625	0.958042	0.923077	0.933718	0.911757
14890	1	0.821429	1	1	0.90625	0.958042	0.923077	0.933718	0.911757
14900	1	0.821429	1	1	0.90625	0.958042	0.923077	0.933718	0.911757
14910	1	0.821429	1	1	0.90625	0.965035	0.923077	0.936599	0.915716
14920	1	0.821429	1	1	0.90625	0.958042	0.923077	0.933718	0.911757
14930	1	0.821429	1	1	0.90625	0.958042	0.923077	0.933718	0.911757
14940	1	0.821429	1	1	0.90625	0.958042	0.923077	0.933718	0.911757
14950	1	0.821429	1	1	0.90625	0.958042	0.923077	0.933718	0.911757
14960	1	0.821429	1	1	0.90625	0.965035	0.923077	0.936599	0.915716
14970	1	0.821429	1	1	0.90625	0.965035	0.923077	0.936599	0.915716
14980	1	0.821429	1	1	0.90625	0.965035	0.923077	0.936599	0.915716
14990	1	0.821429	1	1	0.90625	0.958042	0.923077	0.933718	0.911757
15000	1	0.821429	1	1	0.90625	0.965035	0.923077	0.936599	0.915716
15010	1	0.821429	1	1	0.90625	0.965035	0.923077	0.936599	0.915716
15020	1	0.821429	1	1	0.90625	0.965035	0.923077	0.936599	0.915716
15030	1	0.821429	1	1	0.90625	0.958042	0.923077	0.933718	0.911757
15040	1	0.821429	1	1	0.90625	0.958042	0.923077	0.933718	0.911757
15050	1	0.821429	1	1	0.90625	0.958042	0.923077	0.933718	0.911757
15060	1	0.821429	1	1	0.90625	0.965035	0.923077	0.936599	0.915716
15070	1	0.821429	1	1	0.90625	0.965035	0.923077	0.936599	0.915716
15080	1	0.821429	1	1	0.90625	0.958042	0.923077	0.933718	0.911757
15090	1	0.821429	1	1	0.90625	0.965035	0.923077	0.936599	0.915716
15100	1	0.821429	1	1	0.90625	0.958042	0.923077	0.933718	0.911757
15110	1	0.821429	1	1	0.90625	0.965035	0.923077	0.936599	0.915716
15120	1	0.821429	1	1	0.90625	0.965035	0.923077	0.936599	0.915716
15130	1	0.821429	1	1	0.90625	0.958042	0.923077	0.933718	0.911757
15140	1	0.821429	1	1	0.90625	0.958042	0.923077	0.933718	0.911757
15150	1	0.821429	1	1	0.90625	0.958042	0.923077	0.933718	0.911757
15160	1	0.821429	1	1	0.90625	0.965035	0.923077	0.936599	0.915716
15170	1	0.821429	1	1	0.90625	0.965035	0.923077	0.936599	0.915716
15180	1	0.821429	1	1	0.90625	0.965035	0.923077	0.936599	0.915716
15190	1	0.821429	1	1	0.90625	0.965035	0.923077	0.936599	0.915716
15200	1	0.821429	1	1	0.90625	0.958042	0.923077	0.933718	0.911757
15210	1	0.821429	1	1	0.90625	0.958042	0.923077	0.933718	0.911757
15220	1	0.821429	1	1	0.90625	0.958042	0.923077	0.933718	0.911757
15230	1	0.821429	1	1	0.90625	0.958042	0.923077	0.933718	0.911757
15240	1	0.821429	1	1	0.90625	0.958042	0.923077	0.933718	0.911757
15250	1	0.821429	1	1	0.90625	0.958042	0.923077	0.933718	0.911757
15260	1	0.821429	1	1	0.90625	0.958042	0.923077	0.933718	0.911757
15270	1	0.821429	1	1	0.90625	0.965035	0.923077	0.936599	0.915716
15280	1	0.821429	1	1	0.90625	0.965035	0.923077	0.936599	0.915716
15290	1	0.821429	1	1	0.90625	0.958042	0.923077	0.933718	0.911757
15300	1	0.821429	1	1	0.90625	0.958042	0.923077	0.933718	0.911757
15310	1	0.821429	1	1	0.90625	0.958042	0.923077	0.933718	0.911757
15320	1	0.821429	1	1	0.90625	0.965035	0.923077	0.936599	0.915716
15330	1	0.821429	1	1	0.90625	0.965035	0.923077	0.936599	0.915716
15340	1	0.821429	1	1	0.90625	0.965035	0.923077	0.936599	0.915716
15350	1	0.821429	1	1	0.90625	0.958042	0.923077	0.933718	0.911757
15360	1	0.821429	1	1	0.90625	0.965035	0.923077	0.936599	0.915716
15370	1	0.821429	1	1	0.90625	0.958042	0.923077	0.933718	0.911757
15380	1	0.821429	1	1	0.90625	0.958042	0.923077	0.933718	0.911757
15390	1	0.821429	1	1	0.90625	0.965035	0.923077	0.936599	0.915716
15400	1	0.821429	1	1	0.90625	0.958042	0.923077	0.933718	0.911757
15410	1	0.821429	1	1	0.90625	0.958042	0.923077	0.933718	0.911757
15420	1	0.821429	1	1	0.90625	0.965035	0.923077	0.936599	0.915716
15430	1	0.821429	1	1	0.90625	0.965035	0.923077	0.936599	0.915716
15440	1	0.821429	1	1	0.90625	0.965035	0.923077	0.936599	0.915716
15450	1	0.821429	1	1	0.90625	0.965035	0.923077	0.936599	0.915716
15460	1	0.821429	1	1	0.90625	0.965035	0.923077	0.936599	0.915716
15470	1	0.821429	1	1	0.90625	0.965035	0.923077	0.936599	0.915716
15480	1	0.821429	1	1	0.90625	0.965035	0.923077	0.936599	0.915716
15490	1	0.821429	1	1	0.90625	0.965035	0.923077	0.936599	0.915716
15500	1	0.821429	1	1	0.90625	0.965035	0.923077	0.936599	0.915716
15510	1	0.821429	1	1	0.90625	0.965035	0.923077	0.936599	0.915716
15520	1	0.821429	1	1	0.90625	0.965035	0.923077	0.936599	0.915716
15530	1	0.821429	1	1	0.90625	0.965035	0.923077	0.936599	0.915716
15540	1	0.821429	1	1	0.90625	0.965035	0.923077	0.936599	0.915716
15550	1	0.821429	1	1	0.90625	0.965035	0.923077	0.936599	0.915716
15560	1	0.821429	1	1	0.90625	0.965035	0.923077	0.936599	0.915716
15570	1	0.821429	1	1	0.90625	0.965035	0.923077	0.936599	0.915716
15580	1	0.821429	1	1	0.90625	0.965035	0.923077	0.936599	0.915716
15590	1	0.821429	1	1	0.90625	0.965035	0.923077	0.936599	0.915716
15600	1	0.821429	1	1	0.90625	0.965035	0.923077	0.936599	0.915716
15610	1	0.821429	1	1	0.90625	0.965035	0.923077	0.936599	0.915716
15620	1	0.821429	1	1	0.90625	0.965035	0.923077	0.936599	0.915716
15630	1	0.821429	1	1	0.90625	0.972028	0.923077	0.939481	0.919706
15640	1	0.821429	1	1	0.90625	0.972028	0.923077	0.939481	0.919706
15650	1	0.821429	1	1	0.90625	0.958042	0.923077	0.933718	0.911757
15660	1	0.821429	1	1	0.90625	0.958042	0.923077	0.933718	0.911757
15670	1	0.821429	1	1	0.90625	0.965035	0.923077	0.936599	0.915716
15680	1	0.821429	1	1	0.90625	0.965035	0.923077	0.936599	0.915716
15690	1	0.821429	1	1	0.90625	0.958042	0.923077	0.933718	0.911757
15700	1	0.821429	1	1	0.90625	0.958042	0.923077	0.933718	0.911757
15710	1	0.821429	1	1	0.90625	0.965035	0.923077	0.936599	0.915716
15720	1	0.821429	1	1	0.90625	0.965035	0.923077	0.936599	0.915716
15730	1	0.821429	1	1	0.90625	0.965035	0.923077	0.936599	0.915716
15740	1	0.821429	1	1	0.90625	0.965035	0.923077	0.936599	0.915716
15750	1	0.821429	1	1	0.90625	0.965035	0.923077	0.936599	0.915716
15760	1	0.821429	1	1	0.90625	0.965035	0.923077	0.936599	0.915716
15770	1	0.821429	1	1	0.90625	0.965035	0.923077	0.936599	0.915716
15780	1	0.821429	1	1	0.90625	0.958042	0.923077	0.933718	0.911757
15790	1	0.821429	1	1	0.90625	0.965035	0.923077	0.936599	0.915716
15800	1	0.821429	1	1	0.90625	0.965035	0.923077	0.936599	0.915716
15810	1	0.821429	1	1	0.90625	0.965035	0.923077	0.936599	0.915716
15820	1	0.821429	1	1	0.90625	0.965035	0.923077	0.936599	0.915716
15830	1	0.821429	1	1	0.90625	0.965035	0.923077	0.936599	0.915716
15840	1	0.821429	1	1	0.90625	0.965035	0.923077	0.936599	0.915716
15850	1	0.821429	1	1	0.90625	0.958042	0.923077	0.933718	0.911757
15860	1	0.821429	1	1	0.90625	0.958042	0.923077	0.933718	0.911757
15870	1	0.821429	1	1	0.90625	0.965035	0.923077	0.936599	0.915716
15880	1	0.821429	1	1	0.90625	0.965035	0.923077	0.936599	0.915716
15890	1	0.821429	1	1	0.90625	0.965035	0.923077	0.936599	0.915716
15900	1	0.821429	1	1	0.90625	0.958042	0.923077	0.933718	0.911757
15910	1	0.821429	1	1	0.90625	0.965035	0.923077	0.936599	0.915716
15920	1	0.821429	1	1	0.90625	0.972028	0.923077	0.939481	0.919706
15930	1	0.821429	1	1	0.90625	0.958042	0.923077	0.933718	0.911757
15940	1	0.821429	1	1	0.90625	0.958042	0.923077	0.933718	0.911757
15950	1	0.821429	1	1	0.90625	0.958042	0.923077	0.933718	0.911757
15960	1	0.821429	1	1	0.90625	0.958042	0.923077	0.933718	0.911757
15970	1	0.821429	1	1	0.90625	0.958042	0.923077	0.933718	0.911757
15980	1	0.821429	1	1	0.90625	0.965035	0.923077	0.936599	0.915716
15990	1	0.821429	1	1	0.90625	0.965035	0.923077	0.936599	0.915716
16000	1	0.821429	1	1	0.90625	0.965035	0.923077	0.936599	0.915716
16010	1	0.821429	1	1	0.90625	0.965035	0.923077	0.936599	0.915716
16020	1	0.821429	1	1	0.90625	0.965035	0.923077	0.936599	0.915716
16030	1	0.821429	1	1	0.90625	0.965035	0.923077	0.936599	0.915716
16040	1	0.821429	1	1	0.90625	0.965035	0.923077	0.936599	0.915716
16050	1	0.821429	1	1	0.90625	0.965035	0.923077	0.936599	0.915716
16060	1	0.821429	1	1	0.90625	0.965035	0.923077	0.936599	0.915716
16070	1	0.821429	1	1	0.90625	0.965035	0.923077	0.936599	0.915716
16080	1	0.821429	1	1	0.90625	0.965035	0.923077	0.936599	0.915716
16090	1	0.821429	1	1	0.90625	0.965035	0.923077	0.936599	0.915716
16100	1	0.821429	1	1	0.90625	0.965035	0.923077	0.936599	0.915716
16110	1	0.821429	1	1	0.90625	0.965035	0.923077	0.936599	0.915716
16120	1	0.821429	1	1	0.90625	0.965035	0.923077	0.936599	0.915716
16130	1	0.821429	1	1	0.90625	0.965035	0.923077	0.936599	0.915716
16140	1	0.821429	1	1	0.90625	0.965035	0.923077	0.936599	0.915716
16150	1	0.821429	1	1	0.90625	0.965035	0.923077	0.936599	0.915716
16160	1	0.821429	1	1	0.90625	0.965035	0.923077	0.936599	0.915716
16170	1	0.821429	1	1	0.90625	0.965035	0.923077	0.936599	0.915716
16180	1	0.821429	1	1	0.90625	0.965035	0.923077	0.936599	0.915716
16190	1	0.821429	1	1	0.90625	0.958042	0.923077	0.933718	0.911757
16200	1	0.821429	1	1	0.90625	0.965035	0.923077	0.936599	0.915716
16210	1	0.821429	1	1	0.90625	0.965035	0.923077	0.936599	0.915716
16220	1	0.821429	1	1	0.90625	0.965035	0.923077	0.936599	0.915716
16230	1	0.821429	1	1	0.90625	0.958042	0.923077	0.933718	0.911757
16240	1	0.821429	1	1	0.90625	0.965035	0.923077	0.936599	0.915716
16250	1	0.821429	1	1	0.90625	0.972028	0.923077	0.939481	0.919706
16260	1	0.821429	1	1	0.90625	0.958042	0.923077	0.933718	0.911757
16270	1	0.821429	1	1	0.90625	0.965035	0.923077	0.936599	0.915716
16280	1	0.821429	1	1	0.90625	0.965035	0.923077	0.936599	0.915716
16290	1	0.821429	1	1	0.90625	0.965035	0.923077	0.936599	0.915716
16300	1	0.821429	1	1	0.90625	0.965035	0.923077	0.936599	0.915716
16310	1	0.821429	1	1	0.90625	0.965035	0.923077	0.936599	0.915716
16320	1	0.821429	1	1	0.90625	0.972028	0.923077	0.939481	0.919706
16330	1	0.821429	1	1	0.90625	0.972028	0.923077	0.939481	0.919706
16340	1	0.821429	1	1	0.90625	0.972028	0.923077	0.939481	0.919706
16350	1	0.839286	1	1	0.90625	0.965035	0.923077	0.939481	0.91951
16360	1	0.839286	1	1	0.90625	0.965035	0.923077	0.939481	0.91951
16370	1	0.839286	1	1	0.90625	0.972028	0.923077	0.942363	0.923478
16380	1	0.839286	1	1	0.90625	0.972028	0.923077	0.942363	0.923478
16390	1	0.839286	1	1	0.90625	0.972028	0.923077	0.942363	0.923478
16400	1	0.839286	1	1	0.90625	0.972028	0.923077	0.942363	0.923478
16410	1	0.839286	1	1	0.90625	0.972028	0.923077	0.942363	0.923478
16420	1	0.821429	1	1	0.90625	0.972028	0.923077	0.939481	0.919706
16430	1	0.839286	1	1	0.90625	0.972028	0.923077	0.942363	0.923478
16440	1	0.839286	1	1	0.90625	0.972028	0.923077	0.942363	0.923478
16450	1	0.839286	1	1	0.90625	0.972028	0.923077	0.942363	0.923478
16460	1	0.839286	1	1	0.90625	0.972028	0.923077	0.942363	0.923478
16470	1	0.839286	1	1	0.90625	0.972028	0.923077	0.942363	0.923478
16480	1	0.839286	1	1	0.90625	0.972028	0.923077	0.942363	0.923478
16490	1	0.839286	1	1	0.90625	0.972028	0.923077	0.942363	0.923478
16500	1	0.839286	1	1	0.90625	0.972028	0.923077	0.942363	0.923478
16510	1	0.839286	1	1	0.90625	0.965035	0.923077	0.939481	0.91951
16520	1	0.839286	1	1	0.90625	0.965035	0.923077	0.939481	0.91951
16530	1	0.821429	1	1	0.90625	0.965035	0.923077	0.936599	0.915716
16540	1	0.839286	1	1	0.90625	0.965035	0.923077	0.939481	0.91951
16550	1	0.839286	1	1	0.90625	0.965035	0.923077	0.939481	0.91951
16560	1	0.839286	1	1	0.90625	0.965035	0.923077	0.939481	0.91951
16570	1	0.839286	1	1	0.90625	0.965035	0.923077	0.939481	0.91951
16580	1	0.839286	1	1	0.90625	0.965035	0.923077	0.939481	0.91951
16590	1	0.839286	1	1	0.90625	0.965035	0.923077	0.939481	0.91951
16600	1	0.839286	1	1	0.90625	0.965035	0.923077	0.939481	0.91951
16610	1	0.839286	1	1	0.90625	0.965035	0.923077	0.939481	0.91951
16620	1	0.839286	1	1	0.90625	0.965035	0.923077	0.939481	0.91951
16630	1	0.839286	1	1	0.90625	0.965035	0.923077	0.939481	0.91951
16640	1	0.839286	1	1	0.90625	0.965035	0.923077	0.939481	0.91951
16650	1	0.839286	1	1	0.90625	0.965035	0.923077	0.939481	0.91951
16660	1	0.839286	1	1	0.90625	0.965035	0.923077	0.939481	0.91951
16670	1	0.839286	1	1	0.90625	0.965035	0.923077	0.939481	0.91951
16680	1	0.839286	1	1	0.90625	0.965035	0.923077	0.939481	0.91951
16690	1	0.839286	1	1	0.90625	0.965035	0.923077	0.939481	0.91951
16700	1	0.839286	1	1	0.90625	0.965035	0.923077	0.939481	0.91951
16710	1	0.839286	1	1	0.90625	0.965035	0.923077	0.939481	0.91951
16720	1	0.839286	1	1	0.90625	0.965035	0.923077	0.939481	0.91951
16730	1	0.839286	1	1	0.90625	0.965035	0.923077	0.939481	0.91951
16740	1	0.839286	1	1	0.90625	0.965035	0.923077	0.939481	0.91951
16750	1	0.839286	1	1	0.90625	0.965035	0.923077	0.939481	0.91951
16760	1	0.839286	1	1	0.90625	0.965035	0.923077	0.939481	0.91951
16770	1	0.839286	1	1	0.90625	0.965035	0.923077	0.939481	0.91951
16780	1	0.839286	1	1	0.90625	0.965035	0.923077	0.939481	0.91951
16790	1	0.839286	1	1	0.90625	0.965035	0.923077	0.939481	0.91951
16800	1	0.839286	1	1	0.90625	0.965035	0.923077	0.939481	0.91951
16810	1	0.839286	1	1	0.90625	0.965035	0.923077	0.939481	0.91951
16820	1	0.839286	1	1	0.90625	0.965035	0.923077	0.939481	0.91951
16830	1	0.839286	1	1	0.90625	0.965035	0.923077	0.939481	0.91951
16840	1	0.839286	1	1	0.90625	0.965035	0.923077	0.939481	0.91951
16850	1	0.839286	1	1	0.90625	0.965035	0.923077	0.939481	0.91951
16860	1	0.839286	1	1	0.90625	0.965035	0.923077	0.939481	0.91951
16870	1	0.839286	1	1	0.90625	0.965035	0.923077	0.939481	0.91951
16880	1	0.839286	1	1	0.90625	0.965035	0.923077	0.939481	0.91951
16890	1	0.839286	1	1	0.90625	0.965035	0.923077	0.939481	0.91951
16900	1	0.839286	1	1	0.90625	0.965035	0.923077	0.939481	0.91951
16910	1	0.839286	1	1	0.90625	0.965035	0.923077	0.939481	0.91951
16920	1	0.839286	1	1	0.90625	0.965035	0.923077	0.939481	0.91951
16930	1	0.839286	1	1	0.90625	0.965035	0.923077	0.939481	0.91951
16940	1	0.839286	1	1	0.90625	0.965035	0.923077	0.939481	0.91951
16950	1	0.839286	1	1	0.90625	0.965035	0.923077	0.939481	0.91951
16960	1	0.839286	1	1	0.90625	0.965035	0.923077	0.939481	0.91951
16970	1	0.839286	1	1	0.90625	0.965035	0.923077	0.939481	0.91951
16980	1	0.839286	1	1	0.90625	0.965035	0.923077	0.939481	0.91951
16990	1	0.839286	1	1	0.90625	0.965035	0.923077	0.939481	0.91951
17000	1	0.839286	1	1	0.90625	0.965035	0.923077	0.939481	0.91951
17010	1	0.821429	1	1	0.90625	0.965035	0.923077	0.936599	0.915716
17020	1	0.821429	1	1	0.90625	0.965035	0.923077	0.936599	0.915716
17030	1	0.821429	1	1	0.90625	0.965035	0.923077	0.936599	0.915716
17040	1	0.821429	1	1	0.90625	0.965035	0.923077	0.936599	0.915716
17050	1	0.821429	1	1	0.90625	0.965035	0.923077	0.936599	0.915716
17060	1	0.821429	1	1	0.90625	0.965035	0.923077	0.936599	0.915716
17070	1	0.821429	1	1	0.90625	0.965035	0.923077	0.936599	0.915716
17080	1	0.821429	1	1	0.90625	0.965035	0.923077	0.936599	0.915716
17090	1	0.839286	1	1	0.90625	0.965035	0.923077	0.939481	0.91951
17100	1	0.839286	1	1	0.90625	0.965035	0.923077	0.939481	0.91951
17110	1	0.821429	1	1	0.90625	0.965035	0.923077	0.936599	0.915716
17120	1	0.821429	1	1	0.90625	0.965035	0.923077	0.936599	0.915716
17130	1	0.821429	1	1	0.90625	0.965035	0.923077	0.936599	0.915716
17140	1	0.821429	1	1	0.90625	0.965035	0.923077	0.936599	0.915716
17150	1	0.821429	1	1	0.90625	0.965035	0.923077	0.936599	0.915716
17160	1	0.821429	1	1	0.90625	0.965035	0.923077	0.936599	0.915716
17170	1	0.821429	1	1	0.90625	0.965035	0.923077	0.936599	0.915716
17180	1	0.821429	1	1	0.90625	0.965035	0.923077	0.936599	0.915716
17190	1	0.821429	1	1	0.90625	0.965035	0.923077	0.936599	0.915716
17200	1	0.839286	1	1	0.90625	0.965035	0.923077	0.939481	0.91951
17210	1	0.839286	1	1	0.90625	0.965035	0.923077	0.939481	0.91951
17220	1	0.839286	1	1	0.90625	0.965035	0.923077	0.939481	0.91951
17230	1	0.839286	1	1	0.90625	0.965035	0.923077	0.939481	0.91951
17240	1	0.839286	1	1	0.90625	0.965035	0.923077	0.939481	0.91951
17250	1	0.839286	1	1	0.90625	0.965035	0.923077	0.939481	0.91951
17260	1	0.839286	1	1	0.90625	0.965035	0.923077	0.939481	0.91951
17270	1	0.839286	1	1	0.90625	0.965035	0.923077	0.939481	0.91951
17280	1	0.839286	1	1	0.90625	0.965035	0.923077	0.939481	0.91951
17290	1	0.839286	1	1	0.90625	0.965035	0.923077	0.939481	0.91951
17300	1	0.839286	1	1	0.90625	0.965035	0.923077	0.939481	0.91951
17310	1	0.839286	1	1	0.90625	0.965035	0.923077	0.939481	0.91951
17320	1	0.839286	1	1	0.90625	0.965035	0.923077	0.939481	0.91951
17330	1	0.839286	1	1	0.90625	0.965035	0.923077	0.939481	0.91951
17340	1	0.839286	1	1	0.90625	0.965035	0.923077	0.939481	0.91951
17350	1	0.839286	1	1	0.90625	0.965035	0.923077	0.939481	0.91951
17360	1	0.839286	1	1	0.90625	0.965035	0.923077	0.939481	0.91951
17370	1	0.839286	1	1	0.90625	0.965035	0.923077	0.939481	0.91951
17380	1	0.821429	1	1	0.90625	0.965035	0.923077	0.936599	0.915716
17390	1	0.821429	1	1	0.90625	0.965035	0.923077	0.936599	0.915716
17400	1	0.821429	1	1	0.90625	0.965035	0.923077	0.936599	0.915716
17410	1	0.821429	1	1	0.90625	0.965035	0.923077	0.936599	0.915716
17420	1	0.821429	1	1	0.90625	0.965035	0.923077	0.936599	0.915716
17430	1	0.821429	1	1	0.90625	0.965035	0.923077	0.936599	0.915716
17440	1	0.821429	1	1	0.90625	0.965035	0.923077	0.936599	0.915716
17450	1	0.821429	1	1	0.90625	0.965035	0.923077	0.936599	0.915716
17460	1	0.821429	1	1	0.90625	0.965035	0.923077	0.936599	0.915716
17470	1	0.821429	1	1	0.90625	0.965035	0.923077	0.936599	0.915716
17480	1	0.821429	1	1	0.90625	0.965035	0.923077	0.936599	0.915716
17490	1	0.821429	1	1	0.90625	0.965035	0.923077	0.936599	0.915716
17500	1	0.821429	1	1	0.90625	0.965035	0.923077	0.936599	0.915716
17510	1	0.821429	1	1	0.90625	0.965035	0.923077	0.936599	0.915716
17520	1	0.821429	1	1	0.90625	0.965035	0.923077	0.936599	0.915716
17530	1	0.821429	1	1	0.90625	0.965035	0.923077	0.936599	0.915716
17540	1	0.821429	1	1	0.90625	0.965035	0.923077	0.936599	0.915716
17550	1	0.821429	1	1	0.90625	0.965035	0.923077	0.936599	0.915716
17560	1	0.821429	1	1	0.90625	0.965035	0.923077	0.936599	0.915716
17570	1	0.821429	1	1	0.90625	0.965035	0.923077	0.936599	0.915716
17580	1	0.821429	1	1	0.90625	0.965035	0.923077	0.936599	0.915716
17590	1	0.821429	1	1	0.90625	0.965035	0.923077	0.936599	0.915716
17600	1	0.821429	1	1	0.90625	0.965035	0.923077	0.936599	0.915716
17610	1	0.821429	1	1	0.90625	0.965035	0.923077	0.936599	0.915716
17620	1	0.821429	1	1	0.90625	0.965035	0.923077	0.936599	0.915716
17630	1	0.821429	1	1	0.90625	0.965035	0.923077	0.936599	0.915716
17640	1	0.821429	1	1	0.90625	0.965035	0.923077	0.936599	0.915716
17650	1	0.821429	1	1	0.90625	0.965035	0.923077	0.936599	0.915716
17660	1	0.821429	1	1	0.90625	0.965035	0.923077	0.936599	0.915716
17670	1	0.821429	1	1	0.90625	0.965035	0.923077	0.936599	0.915716
17680	1	0.821429	1	1	0.90625	0.965035	0.923077	0.936599	0.915716
17690	1	0.821429	1	1	0.90625	0.965035	0.923077	0.936599	0.915716
17700	1	0.821429	1	1	0.90625	0.965035	0.923077	0.936599	0.915716
17710	1	0.821429	1	1	0.90625	0.965035	0.923077	0.936599	0.915716
17720	1	0.821429	1	1	0.90625	0.965035	0.923077	0.936599	0.915716
17730	1	0.821429	1	1	0.90625	0.958042	0.923077	0.933718	0.911757
17740	1	0.821429	1	1	0.90625	0.965035	0.923077	0.936599	0.915716
17750	1	0.821429	1	1	0.90625	0.965035	0.923077	0.936599	0.915716
17760	1	0.821429	1	1	0.90625	0.965035	0.923077	0.936599	0.915716
17770	1	0.821429	1	1	0.90625	0.965035	0.923077	0.936599	0.915716
17780	1	0.821429	1	1	0.90625	0.965035	0.923077	0.936599	0.915716
17790	1	0.821429	1	1	0.90625	0.965035	0.923077	0.936599	0.915716
17800	1	0.821429	1	1	0.90625	0.972028	0.923077	0.939481	0.919706
17810	1	0.821429	1	1	0.90625	0.972028	0.923077	0.939481	0.919706
17820	1	0.821429	1	1	0.90625	0.972028	0.923077	0.939481	0.919706
17830	1	0.821429	1	1	0.90625	0.972028	0.923077	0.939481	0.919706
17840	1	0.821429	1	1	0.90625	0.972028	0.923077	0.939481	0.919706
17850	1	0.821429	1	1	0.90625	0.972028	0.923077	0.939481	0.919706
17860	1	0.821429	1	1	0.90625	0.972028	0.923077	0.939481	0.919706
17870	1	0.821429	1	1	0.90625	0.965035	0.923077	0.936599	0.915716
17880	1	0.821429	1	1	0.90625	0.972028	0.923077	0.939481	0.919706
17890	1	0.821429	1	1	0.90625	0.965035	0.923077	0.936599	0.915716
17900	1	0.821429	1	1	0.90625	0.965035	0.923077	0.936599	0.915716
17910	1	0.821429	1	1	0.90625	0.965035	0.923077	0.936599	0.915716
17920	1	0.821429	1	1	0.90625	0.965035	0.923077	0.936599	0.915716
17930	1	0.821429	1	1	0.90625	0.965035	0.923077	0.936599	0.915716
17940	1	0.821429	1	1	0.90625	0.965035	0.923077	0.936599	0.915716
17950	1	0.821429	1	1	0.90625	0.965035	0.923077	0.936599	0.915716
17960	1	0.821429	1	1	0.90625	0.965035	0.923077	0.936599	0.915716
17970	1	0.821429	1	1	0.90625	0.965035	0.923077	0.936599	0.915716
17980	1	0.821429	1	1	0.90625	0.965035	0.923077	0.936599	0.915716
17990	1	0.821429	1	1	0.90625	0.965035	0.923077	0.936599	0.915716
18000	1	0.821429	1	1	0.90625	0.965035	0.923077	0.936599	0.915716
18010	1	0.821429	1	1	0.90625	0.965035	0.923077	0.936599	0.915716
18020	1	0.821429	1	1	0.90625	0.965035	0.923077	0.936599	0.915716
18030	1	0.821429	1	1	0.90625	0.965035	0.923077	0.936599	0.915716
18040	1	0.821429	1	1	0.90625	0.965035	0.923077	0.936599	0.915716
18050	1	0.821429	1	1	0.90625	0.965035	0.923077	0.936599	0.915716
18060	1	0.821429	1	1	0.90625	0.965035	0.923077	0.936599	0.915716
18070	1	0.821429	1	1	0.90625	0.965035	0.923077	0.936599	0.915716
18080	1	0.821429	1	1	0.90625	0.965035	0.923077	0.936599	0.915716
18090	1	0.821429	1	1	0.90625	0.965035	0.923077	0.936599	0.915716
18100	1	0.821429	1	1	0.90625	0.965035	0.923077	0.936599	0.915716
18110	1	0.821429	1	1	0.90625	0.965035	0.923077	0.936599	0.915716
18120	1	0.821429	1	1	0.90625	0.965035	0.923077	0.936599	0.915716
18130	1	0.821429	1	1	0.90625	0.965035	0.923077	0.936599	0.915716
18140	1	0.821429	1	1	0.90625	0.965035	0.923077	0.936599	0.915716
18150	1	0.821429	1	1	0.90625	0.965035	0.923077	0.936599	0.915716
18160	1	0.821429	1	1	0.90625	0.965035	0.923077	0.936599	0.915716
18170	1	0.821429	1	1	0.90625	0.965035	0.923077	0.936599	0.915716
18180	1	0.821429	1	1	0.90625	0.965035	0.923077	0.936599	0.915716
18190	1	0.821429	1	1	0.90625	0.965035	0.923077	0.936599	0.915716
18200	1	0.821429	1	1	0.90625	0.965035	0.923077	0.936599	0.915716
18210	1	0.821429	1	1	0.90625	0.965035	0.923077	0.936599	0.915716
18220	1	0.821429	1	1	0.90625	0.965035	0.923077	0.936599	0.915716
18230	1	0.821429	1	1	0.90625	0.965035	0.923077	0.936599	0.915716
18240	1	0.821429	1	1	0.90625	0.965035	0.923077	0.936599	0.915716
18250	1	0.821429	1	1	0.90625	0.965035	0.923077	0.936599	0.915716
18260	1	0.821429	1	1	0.90625	0.965035	0.923077	0.936599	0.915716
18270	1	0.821429	1	1	0.90625	0.965035	0.923077	0.936599	0.915716
18280	1	0.821429	1	1	0.90625	0.965035	0.923077	0.936599	0.915716
18290	1	0.821429	1	1	0.90625	0.965035	0.923077	0.936599	0.915716
18300	1	0.821429	1	1	0.90625	0.965035	0.923077	0.936599	0.915716
18310	1	0.821429	1	1	0.90625	0.965035	0.923077	0.936599	0.915716
18320	1	0.821429	1	1	0.90625	0.965035	0.923077	0.936599	0.915716
18330	1	0.821429	1	1	0.90625	0.965035	0.923077	0.936599	0.915716
18340	1	0.821429	1	1	0.90625	0.965035	0.923077	0.936599	0.915716
18350	1	0.821429	1	1	0.90625	0.965035	0.923077	0.936599	0.915716
18360	1	0.821429	1	1	0.90625	0.965035	0.923077	0.936599	0.915716
18370	1	0.821429	1	1	0.90625	0.965035	0.923077	0.936599	0.915716
18380	1	0.821429	1	1	0.90625	0.965035	0.923077	0.936599	0.915716
18390	1	0.821429	1	1	0.90625	0.965035	0.923077	0.936599	0.915716
18400	1	0.821429	1	1	0.90625	0.965035	0.923077	0.936599	0.915716
18410	1	0.821429	1	1	0.90625	0.965035	0.923077	0.936599	0.915716
18420	1	0.821429	1	1	0.90625	0.965035	0.923077	0.936599	0.915716
18430	1	0.821429	1	1	0.90625	0.965035	0.923077	0.936599	0.915716
18440	1	0.821429	1	1	0.90625	0.965035	0.923077	0.936599	0.915716
18450	1	0.821429	1	1	0.90625	0.965035	0.923077	0.936599	0.915716
18460	1	0.821429	1	1	0.90625	0.965035	0.923077	0.936599	0.915716
18470	1	0.821429	1	1	0.90625	0.965035	0.923077	0.936599	0.915716
18480	1	0.821429	1	1	0.90625	0.965035	0.923077	0.936599	0.915716
18490	1	0.821429	1	1	0.90625	0.965035	0.923077	0.936599	0.915716
18500	1	0.821429	1	1	0.90625	0.965035	0.923077	0.936599	0.915716
18510	1	0.821429	1	1	0.90625	0.965035	0.923077	0.936599	0.915716
18520	1	0.821429	1	1	0.90625	0.965035	0.923077	0.936599	0.915716
18530	1	0.821429	1	1	0.90625	0.965035	0.923077	0.936599	0.915716
18540	1	0.821429	1	1	0.90625	0.965035	0.923077	0.936599	0.915716
18550	1	0.821429	1	1	0.90625	0.965035	0.923077	0.936599	0.915716
18560	1	0.821429	1	1	0.90625	0.965035	0.923077	0.936599	0.915716
18570	1	0.821429	1	1	0.90625	0.965035	0.923077	0.936599	0.915716
18580	1	0.821429	1	1	0.90625	0.965035	0.923077	0.936599	0.915716
18590	1	0.821429	1	1	0.90625	0.965035	0.923077	0.936599	0.915716
18600	1	0.821429	1	1	0.90625	0.965035	0.923077	0.936599	0.915716
18610	1	0.821429	1	1	0.90625	0.965035	0.923077	0.936599	0.915716
18620	1	0.821429	1	1	0.90625	0.965035	0.923077	0.936599	0.915716
18630	1	0.821429	1	1	0.90625	0.965035	0.923077	0.936599	0.915716
18640	1	0.821429	1	1	0.90625	0.965035	0.923077	0.936599	0.915716
18650	1	0.821429	1	1	0.90625	0.965035	0.923077	0.936599	0.915716
18660	1	0.821429	1	1	0.90625	0.965035	0.923077	0.936599	0.915716
18670	1	0.821429	1	1	0.90625	0.965035	0.923077	0.936599	0.915716
18680	1	0.821429	1	1	0.90625	0.965035	0.923077	0.936599	0.915716
18690	1	0.821429	1	1	0.90625	0.965035	0.923077	0.936599	0.915716
18700	1	0.821429	1	1	0.90625	0.965035	0.923077	0.936599	0.915716
18710	1	0.821429	1	1	0.90625	0.965035	0.923077	0.936599	0.915716
18720	1	0.821429	1	1	0.90625	0.965035	0.923077	0.936599	0.915716
18730	1	0.821429	1	1	0.90625	0.965035	0.923077	0.936599	0.915716
18740	1	0.821429	1	1	0.90625	0.965035	0.923077	0.936599	0.915716
18750	1	0.821429	1	1	0.90625	0.965035	0.923077	0.936599	0.915716
18760	1	0.821429	1	1	0.90625	0.965035	0.923077	0.936599	0.915716
18770	1	0.821429	1	1	0.90625	0.965035	0.923077	0.936599	0.915716
18780	1	0.821429	1	1	0.90625	0.965035	0.923077	0.936599	0.915716
18790	1	0.821429	1	1	0.90625	0.965035	0.923077	0.936599	0.915716
18800	1	0.821429	1	1	0.90625	0.965035	0.923077	0.936599	0.915716
18810	1	0.821429	1	1	0.90625	0.965035	0.923077	0.936599	0.915716
18820	1	0.821429	1	1	0.90625	0.965035	0.923077	0.936599	0.915716
18830	1	0.821429	1	1	0.90625	0.965035	0.923077	0.936599	0.915716
18840	1	0.821429	1	1	0.90625	0.965035	0.923077	0.936599	0.915716
18850	1	0.821429	1	1	0.90625	0.965035	0.923077	0.936599	0.915716
18860	1	0.821429	1	1	0.90625	0.965035	0.923077	0.936599	0.915716
18870	1	0.821429	1	1	0.90625	0.965035	0.923077	0.936599	0.915716
18880	1	0.821429	1	1	0.90625	0.965035	0.923077	0.936599	0.915716
18890	1	0.821429	1	1	0.90625	0.965035	0.923077	0.936599	0.915716
18900	1	0.821429	1	1	0.90625	0.965035	0.923077	0.936599	0.915716
18910	1	0.821429	1	1	0.90625	0.965035	0.923077	0.936599	0.915716
18920	1	0.821429	1	1	0.90625	0.965035	0.923077	0.936599	0.915716
18930	1	0.821429	1	1	0.90625	0.965035	0.923077	0.936599	0.915716
18940	1	0.821429	1	1	0.90625	0.965035	0.923077	0.936599	0.915716
18950	1	0.821429	1	1	0.90625	0.965035	0.923077	0.936599	0.915716
18960	1	0.821429	1	1	0.90625	0.965035	0.923077	0.936599	0.915716
18970	1	0.821429	1	1	0.90625	0.965035	0.923077	0.936599	0.915716
18980	1	0.821429	1	1	0.90625	0.965035	0.923077	0.936599	0.915716
18990	1	0.821429	1	1	0.90625	0.965035	0.923077	0.936599	0.915716
19000	1	0.821429	1	1	0.90625	0.965035	0.923077	0.936599	0.915716
19010	1	0.821429	1	1	0.90625	0.965035	0.923077	0.936599	0.915716
19020	1	0.821429	1	1	0.90625	0.965035	0.923077	0.936599	0.915716
19030	1	0.821429	1	1	0.90625	0.965035	0.923077	0.936599	0.915716
19040	1	0.821429	1	1	0.90625	0.965035	0.923077	0.936599	0.915716
19050	1	0.821429	1	1	0.90625	0.965035	0.923077	0.936599	0.915716
19060	1	0.821429	1	1	0.90625	0.965035	0.923077	0.936599	0.915716
19070	1	0.821429	1	1	0.90625	0.965035	0.923077	0.936599	0.915716
19080	1	0.821429	1	1	0.90625	0.965035	0.923077	0.936599	0.915716
19090	1	0.821429	1	1	0.90625	0.965035	0.923077	0.936599	0.915716
19100	1	0.821429	1	1	0.90625	0.965035	0.923077	0.936599	0.915716
19110	1	0.821429	1	1	0.90625	0.965035	0.923077	0.936599	0.915716
19120	1	0.821429	1	1	0.90625	0.965035	0.923077	0.936599	0.915716
19130	1	0.821429	1	1	0.90625	0.965035	0.923077	0.936599	0.915716
19140	1	0.821429	1	1	0.90625	0.965035	0.923077	0.936599	0.915716
19150	1	0.821429	1	1	0.90625	0.965035	0.923077	0.936599	0.915716
19160	1	0.821429	1	1	0.90625	0.965035	0.923077	0.936599	0.915716
19170	1	0.821429	1	1	0.90625	0.965035	0.923077	0.936599	0.915716
19180	1	0.821429	1	1	0.90625	0.965035	0.923077	0.936599	0.915716
19190	1	0.821429	1	1	0.90625	0.965035	0.923077	0.936599	0.915716
19200	1	0.821429	1	1	0.90625	0.965035	0.923077	0.936599	0.915716
19210	1	0.821429	1	1	0.90625	0.965035	0.923077	0.936599	0.915716
19220	1	0.821429	1	1	0.90625	0.965035	0.923077	0.936599	0.915716
19230	1	0.821429	1	1	0.90625	0.965035	0.923077	0.936599	0.915716
19240	1	0.821429	1	1	0.90625	0.965035	0.923077	0.936599	0.915716
19250	1	0.821429	1	1	0.90625	0.965035	0.923077	0.936599	0.915716
19260	1	0.821429	1	1	0.90625	0.965035	0.923077	0.936599	0.915716
19270	1	0.821429	1	1	0.90625	0.965035	0.923077	0.936599	0.915716
19280	1	0.821429	1	1	0.90625	0.965035	0.923077	0.936599	0.915716
19290	1	0.821429	1	1	0.90625	0.965035	0.923077	0.936599	0.915716
19300	1	0.821429	1	1	0.90625	0.965035	0.923077	0.936599	0.915716
19310	1	0.821429	1	1	0.90625	0.965035	0.923077	0.936599	0.915716
19320	1	0.821429	1	1	0.90625	0.965035	0.923077	0.936599	0.915716
19330	1	0.821429	1	1	0.90625	0.965035	0.923077	0.936599	0.915716
19340	1	0.821429	1	1	0.90625	0.965035	0.923077	0.936599	0.915716
19350	1	0.821429	1	1	0.90625	0.965035	0.923077	0.936599	0.915716
19360	1	0.821429	1	1	0.90625	0.965035	0.923077	0.936599	0.915716
19370	1	0.821429	1	1	0.90625	0.965035	0.923077	0.936599	0.915716
19380	1	0.821429	1	1	0.90625	0.965035	0.923077	0.936599	0.915716
19390	1	0.821429	1	1	0.90625	0.965035	0.923077	0.936599	0.915716
19400	1	0.821429	1	1	0.90625	0.965035	0.923077	0.936599	0.915716
19410	1	0.821429	1	1	0.90625	0.965035	0.923077	0.936599	0.915716
19420	1	0.821429	1	1	0.90625	0.965035	0.923077	0.936599	0.915716
19430	1	0.821429	1	1	0.90625	0.965035	0.923077	0.936599	0.915716
19440	1	0.821429	1	1	0.90625	0.965035	0.923077	0.936599	0.915716
19450	1	0.821429	1	1	0.90625	0.965035	0.923077	0.936599	0.915716
19460	1	0.821429	1	1	0.90625	0.965035	0.923077	0.936599	0.915716
19470	1	0.821429	1	1	0.90625	0.965035	0.923077	0.936599	0.915716
19480	1	0.821429	1	1	0.90625	0.965035	0.923077	0.936599	0.915716
19490	1	0.821429	1	1	0.90625	0.965035	0.923077	0.936599	0.915716
19500	1	0.821429	1	1	0.90625	0.965035	0.923077	0.936599	0.915716
19510	1	0.821429	1	1	0.90625	0.965035	0.923077	0.936599	0.915716
19520	1	0.821429	1	1	0.90625	0.965035	0.923077	0.936599	0.915716
19530	1	0.821429	1	1	0.90625	0.965035	0.923077	0.936599	0.915716
19540	1	0.821429	1	1	0.90625	0.965035	0.923077	0.936599	0.915716
19550	1	0.821429	1	1	0.90625	0.965035	0.923077	0.936599	0.915716
19560	1	0.821429	1	1	0.90625	0.965035	0.923077	0.936599	0.915716
19570	1	0.821429	1	1	0.90625	0.965035	0.923077	0.936599	0.915716
19580	1	0.821429	1	1	0.90625	0.965035	0.923077	0.936599	0.915716
19590	1	0.821429	1	1	0.90625	0.965035	0.923077	0.936599	0.915716
19600	1	0.821429	1	1	0.90625	0.965035	0.923077	0.936599	0.915716
19610	1	0.821429	1	1	0.90625	0.965035	0.923077	0.936599	0.915716
19620	1	0.821429	1	1	0.90625	0.965035	0.923077	0.936599	0.915716
19630	1	0.821429	1	1	0.90625	0.965035	0.923077	0.936599	0.915716
19640	1	0.821429	1	1	0.90625	0.965035	0.923077	0.936599	0.915716
19650	1	0.821429	1	1	0.90625	0.965035	0.923077	0.936599	0.915716
19660	1	0.821429	1	1	0.90625	0.965035	0.923077	0.936599	0.915716
19670	1	0.821429	1	1	0.90625	0.965035	0.923077	0.936599	0.915716
19680	1	0.821429	1	1	0.90625	0.965035	0.923077	0.936599	0.915716
19690	1	0.821429	1	1	0.90625	0.965035	0.923077	0.936599	0.915716
19700	1	0.821429	1	1	0.90625	0.965035	0.923077	0.936599	0.915716
19710	1	0.821429	1	1	0.90625	0.965035	0.923077	0.936599	0.915716
19720	1	0.821429	1	1	0.90625	0.965035	0.923077	0.936599	0.915716
19730	1	0.821429	1	1	0.90625	0.965035	0.923077	0.936599	0.915716
19740	1	0.821429	1	1	0.90625	0.965035	0.923077	0.936599	0.915716
19750	1	0.821429	1	1	0.90625	0.965035	0.923077	0.936599	0.915716
19760	1	0.821429	1	1	0.90625	0.965035	0.923077	0.936599	0.915716
19770	1	0.821429	1	1	0.90625	0.965035	0.923077	0.936599	0.915716
19780	1	0.821429	1	1	0.90625	0.965035	0.923077	0.936599	0.915716
19790	1	0.821429	1	1	0.90625	0.972028	0.923077	0.939481	0.919706
19800	1	0.821429	1	1	0.90625	0.965035	0.923077	0.936599	0.915716
19810	1	0.821429	1	1	0.90625	0.972028	0.923077	0.939481	0.919706
19820	1	0.821429	1	1	0.90625	0.972028	0.923077	0.939481	0.919706
19830	1	0.821429	1	1	0.90625	0.972028	0.923077	0.939481	0.919706
19840	1	0.821429	1	1	0.90625	0.972028	0.923077	0.939481	0.919706
19850	1	0.821429	1	1	0.90625	0.972028	0.923077	0.939481	0.919706
19860	1	0.821429	1	1	0.90625	0.972028	0.923077	0.939481	0.919706
19870	1	0.821429	1	1	0.90625	0.972028	0.923077	0.939481	0.919706
19880	1	0.821429	1	1	0.90625	0.972028	0.923077	0.939481	0.919706
19890	1	0.821429	1	1	0.90625	0.972028	0.923077	0.939481	0.919706
19900	1	0.821429	1	1	0.90625	0.972028	0.923077	0.939481	0.919706
19910	1	0.821429	1	1	0.90625	0.972028	0.923077	0.939481	0.919706
19920	1	0.821429	1	1	0.90625	0.972028	0.923077	0.939481	0.919706
19930	1	0.821429	1	1	0.90625	0.972028	0.923077	0.939481	0.919706
19940	1	0.821429	1	1	0.90625	0.972028	0.923077	0.939481	0.919706
19950	1	0.821429	1	1	0.90625	0.972028	0.923077	0.939481	0.919706
19960	1	0.821429	1	1	0.90625	0.972028	0.923077	0.939481	0.919706
19970	1	0.821429	1	1	0.90625	0.972028	0.923077	0.939481	0.919706
19980	1	0.821429	1	1	0.90625	0.972028	0.923077	0.939481	0.919706
19990	1	0.821429	1	1	0.90625	0.972028	0.923077	0.939481	0.919706
[truncated: 2,239 more rows]

## Sheet: RIPPER
Number of features	G34	MES	MID	MYCN	RTK	RTK II	RTK III	Overall accuracy	MCC
10	0.97561	0.107143	0.571429	0.125	0.21875	0.867133	0.384615	0.573487	0.410333
20	0.97561	0.375	0.714286	0.1875	0.15625	0.741259	0.615385	0.570605	0.413054
30	0.97561	0.428571	0.714286	0.375	0.78125	0.769231	0.461538	0.708934	0.60693
40	0.926829	0.607143	0.642857	0.5	0.828125	0.797203	0.538462	0.757925	0.675635
50	0.926829	0.607143	0.571429	0.6875	0.78125	0.846154	0.307692	0.766571	0.68482
60	0.902439	0.571429	0.357143	0.5	0.796875	0.818182	0.461538	0.737752	0.646768
70	0.95122	0.553571	0.571429	0.5625	0.75	0.797203	0.692308	0.743516	0.653938
80	0.878049	0.446429	0.571429	0.6875	0.78125	0.755245	0.384615	0.700288	0.595409
90	0.902439	0.5	0.571429	0.5	0.734375	0.804196	0.538462	0.720461	0.622398
100	0.926829	0.464286	0.357143	0.4375	0.71875	0.811189	0.307692	0.697406	0.588806
110	0.926829	0.589286	0.571429	0.4375	0.703125	0.846154	0.538462	0.746398	0.657215
120	0.902439	0.696429	0.428571	0.5	0.8125	0.853147	0.538462	0.78098	0.70573
130	0.878049	0.589286	0.5	0.5625	0.796875	0.867133	0.461538	0.766571	0.683784
140	0.853659	0.625	0.428571	0.625	0.78125	0.853147	0.538462	0.763689	0.681807
150	0.95122	0.678571	0.642857	0.625	0.765625	0.804196	0.461538	0.766571	0.687087
160	0.97561	0.678571	0.571429	0.375	0.734375	0.811189	0.307692	0.746398	0.659708
170	0.926829	0.696429	0.571429	0.625	0.796875	0.818182	0.384615	0.772334	0.694996
180	0.878049	0.607143	0.5	0.625	0.828125	0.804196	0.615385	0.757925	0.674116
190	0.95122	0.571429	0.5	0.4375	0.828125	0.811189	0.384615	0.746398	0.658166
200	0.878049	0.607143	0.571429	0.5625	0.734375	0.804196	0.461538	0.73487	0.64445
210	0.926829	0.589286	0.571429	0.5	0.75	0.797203	0.461538	0.73487	0.64235
220	0.853659	0.607143	0.428571	0.625	0.828125	0.839161	0.615385	0.766571	0.685844
230	0.926829	0.660714	0.357143	0.8125	0.71875	0.825175	0.538462	0.760807	0.678418
240	0.902439	0.660714	0.571429	0.5	0.796875	0.846154	0.538462	0.775216	0.698187
250	0.878049	0.660714	0.285714	0.625	0.78125	0.783217	0.615385	0.740634	0.654057
260	0.902439	0.607143	0.357143	0.5	0.703125	0.825175	0.615385	0.73487	0.64092
270	0.926829	0.571429	0.428571	0.6875	0.796875	0.797203	0.461538	0.743516	0.65651
280	0.902439	0.732143	0.357143	0.5	0.6875	0.846154	0.538462	0.757925	0.67178
290	0.902439	0.589286	0.428571	0.625	0.71875	0.846154	0.615385	0.752161	0.664796
300	0.878049	0.714286	0.357143	0.375	0.78125	0.804196	0.538462	0.746398	0.658907
310	0.902439	0.535714	0.5	0.375	0.78125	0.818182	0.615385	0.73487	0.641942
320	0.926829	0.660714	0.571429	0.5625	0.71875	0.846154	0.307692	0.757925	0.672364
330	0.829268	0.571429	0.428571	0.4375	0.8125	0.86014	0.615385	0.755043	0.668763
340	0.878049	0.571429	0.5	0.6875	0.75	0.86014	0.461538	0.757925	0.672865
350	0.926829	0.625	0.571429	0.5	0.765625	0.839161	0.538462	0.763689	0.681376
360	0.926829	0.589286	0.428571	0.625	0.734375	0.832168	0.461538	0.746398	0.657487
370	0.878049	0.660714	0.5	0.4375	0.765625	0.832168	0.538462	0.755043	0.669325
380	0.926829	0.607143	0.428571	0.5	0.734375	0.874126	0.307692	0.755043	0.666986
390	0.902439	0.803571	0.5	0.5	0.71875	0.818182	0.307692	0.760807	0.679071
400	0.878049	0.607143	0.642857	0.5	0.65625	0.825175	0.461538	0.729107	0.636011
410	0.926829	0.625	0.285714	0.5625	0.78125	0.783217	0.769231	0.743516	0.656454
420	0.878049	0.803571	0.285714	0.5625	0.75	0.832168	0.384615	0.766571	0.68775
430	0.902439	0.553571	0.571429	0.5	0.640625	0.811189	0.615385	0.717579	0.617112
440	0.902439	0.678571	0.571429	0.6875	0.671875	0.797203	0.461538	0.740634	0.652278
450	0.926829	0.696429	0.642857	0.75	0.671875	0.79021	0.538462	0.752161	0.667668
460	0.902439	0.625	0.5	0.5	0.640625	0.825175	0.692308	0.73487	0.642829
470	0.878049	0.642857	0.5	0.375	0.734375	0.832168	0.615385	0.746398	0.659001
480	0.853659	0.607143	0.571429	0.5	0.78125	0.846154	0.538462	0.757925	0.67484
490	0.853659	0.571429	0.642857	0.5	0.703125	0.818182	0.538462	0.729107	0.635194
500	0.902439	0.660714	0.642857	0.6875	0.765625	0.825175	0.384615	0.766571	0.684468
510	0.97561	0.696429	0.5	0.375	0.703125	0.846154	0.615385	0.766571	0.684758
520	0.95122	0.767857	0.428571	0.625	0.78125	0.839161	0.615385	0.795389	0.725208
530	0.878049	0.625	0.642857	0.75	0.78125	0.797203	0.461538	0.755043	0.672609
540	0.902439	0.714286	0.571429	0.6875	0.6875	0.79021	0.384615	0.743516	0.656397
550	0.853659	0.571429	0.571429	0.625	0.734375	0.783217	0.692308	0.729107	0.634622
560	0.902439	0.571429	0.714286	0.6875	0.734375	0.839161	0.615385	0.763689	0.681268
570	0.878049	0.607143	0.785714	0.625	0.6875	0.825175	0.615385	0.752161	0.666867
580	0.878049	0.642857	0.571429	0.75	0.75	0.776224	0.692308	0.74928	0.666021
590	0.902439	0.660714	0.5	0.6875	0.71875	0.748252	0.692308	0.731988	0.643303
600	0.902439	0.642857	0.714286	0.4375	0.6875	0.748252	0.615385	0.717579	0.623435
610	0.878049	0.642857	0.5	0.625	0.734375	0.818182	0.692308	0.755043	0.669422
620	0.926829	0.678571	0.571429	0.5625	0.75	0.804196	0.692308	0.763689	0.682472
630	0.853659	0.625	0.714286	0.6875	0.734375	0.776224	0.538462	0.737752	0.649695
640	0.902439	0.625	0.642857	0.6875	0.796875	0.783217	0.692308	0.760807	0.679644
650	0.902439	0.625	0.714286	0.625	0.75	0.853147	0.538462	0.775216	0.695433
660	0.780488	0.660714	0.714286	0.5625	0.71875	0.804196	0.769231	0.746398	0.659322
670	0.97561	0.571429	0.642857	0.625	0.703125	0.846154	0.769231	0.769452	0.687892
680	0.902439	0.678571	0.714286	0.6875	0.703125	0.832168	0.538462	0.769452	0.689594
690	0.804878	0.625	0.428571	0.6875	0.71875	0.797203	0.461538	0.723343	0.626801
700	0.902439	0.589286	0.714286	0.6875	0.71875	0.783217	0.692308	0.743516	0.655611
710	0.902439	0.642857	0.5	0.5625	0.703125	0.811189	0.538462	0.740634	0.651703
720	0.926829	0.696429	0.642857	0.625	0.734375	0.825175	0.692308	0.778098	0.700654
730	0.95122	0.625	0.857143	0.5	0.671875	0.825175	0.538462	0.755043	0.668665
740	0.878049	0.660714	0.5	0.625	0.703125	0.811189	0.692308	0.74928	0.664242
750	0.95122	0.660714	0.642857	0.625	0.75	0.783217	0.384615	0.74928	0.662702
760	0.878049	0.678571	0.571429	0.75	0.6875	0.818182	0.692308	0.760807	0.678815
770	0.95122	0.571429	0.5	0.625	0.75	0.804196	0.538462	0.743516	0.654324
780	0.804878	0.607143	0.428571	0.375	0.765625	0.804196	0.615385	0.723343	0.628145
790	0.878049	0.5	0.571429	0.4375	0.765625	0.825175	0.846154	0.740634	0.650175
800	0.878049	0.660714	0.642857	0.5	0.671875	0.832168	0.538462	0.746398	0.657931
810	0.926829	0.607143	0.571429	0.625	0.734375	0.818182	0.538462	0.752161	0.666737
820	0.902439	0.678571	0.714286	0.625	0.75	0.783217	0.538462	0.755043	0.672439
830	0.902439	0.678571	0.714286	0.625	0.6875	0.825175	0.615385	0.763689	0.68303
840	0.95122	0.678571	0.5	0.4375	0.71875	0.818182	0.461538	0.74928	0.662679
850	0.853659	0.625	0.5	0.5625	0.734375	0.734266	0.538462	0.706052	0.609297
860	0.878049	0.625	0.785714	0.8125	0.765625	0.783217	0.538462	0.757925	0.676804
870	0.878049	0.589286	0.571429	0.6875	0.6875	0.811189	0.615385	0.737752	0.64891
880	0.926829	0.553571	0.714286	0.625	0.71875	0.818182	0.692308	0.752161	0.666143
890	0.853659	0.625	0.642857	0.4375	0.703125	0.832168	0.615385	0.743516	0.653233
900	0.853659	0.553571	0.642857	0.625	0.78125	0.818182	0.384615	0.740634	0.648636
910	0.902439	0.642857	0.642857	0.5625	0.703125	0.818182	0.538462	0.74928	0.66217
920	0.95122	0.482143	0.428571	0.625	0.671875	0.832168	0.846154	0.73487	0.642019
930	0.902439	0.571429	0.5	0.5625	0.828125	0.832168	0.384615	0.755043	0.668347
940	0.829268	0.625	0.571429	0.6875	0.71875	0.797203	0.461538	0.731988	0.640407
950	0.878049	0.625	0.5	0.5	0.71875	0.762238	0.307692	0.706052	0.604636
960	0.878049	0.660714	0.571429	0.6875	0.78125	0.748252	0.307692	0.729107	0.63889
970	0.97561	0.75	0.5	0.5625	0.65625	0.846154	0.461538	0.769452	0.688598
980	0.853659	0.625	0.785714	0.75	0.75	0.741259	0.538462	0.731988	0.6434
990	0.878049	0.589286	0.857143	0.625	0.765625	0.79021	0.538462	0.74928	0.662298
1000	0.878049	0.589286	0.714286	0.5625	0.734375	0.755245	0.692308	0.726225	0.632539
1010	0.853659	0.571429	0.714286	0.5625	0.734375	0.853147	0.692308	0.760807	0.67721
1020	0.95122	0.642857	0.714286	0.625	0.703125	0.769231	0.692308	0.746398	0.661673
1030	0.853659	0.678571	0.571429	0.625	0.703125	0.846154	0.692308	0.766571	0.685122
1040	0.902439	0.75	0.642857	0.625	0.578125	0.881119	0.384615	0.766571	0.684585
1050	0.902439	0.553571	0.571429	0.4375	0.703125	0.832168	0.615385	0.73487	0.640617
1060	0.902439	0.625	0.571429	0.75	0.75	0.762238	0.538462	0.737752	0.650431
1070	0.902439	0.642857	0.642857	0.625	0.78125	0.79021	0.615385	0.757925	0.674623
1080	0.902439	0.625	0.142857	0.6875	0.734375	0.804196	0.461538	0.729107	0.634883
1090	0.878049	0.517857	0.642857	0.5	0.78125	0.804196	0.384615	0.726225	0.631078
1100	0.95122	0.660714	0.642857	0.5625	0.703125	0.832168	0.615385	0.766571	0.6849
1110	0.853659	0.571429	0.5	0.5	0.796875	0.79021	0.461538	0.726225	0.632305
1120	0.853659	0.589286	0.714286	0.625	0.765625	0.832168	0.692308	0.763689	0.681758
1130	0.853659	0.660714	0.642857	0.5625	0.734375	0.811189	0.692308	0.755043	0.671193
1140	0.902439	0.732143	0.5	0.5	0.75	0.811189	0.461538	0.757925	0.674675
1150	0.902439	0.607143	0.5	0.6875	0.734375	0.797203	0.615385	0.743516	0.655516
1160	0.878049	0.607143	0.5	0.5625	0.703125	0.804196	0.461538	0.726225	0.631623
1170	0.902439	0.553571	0.642857	0.5	0.71875	0.832168	0.615385	0.743516	0.653515
1180	0.926829	0.785714	0.785714	0.625	0.765625	0.818182	0.769231	0.804035	0.737344
1190	0.902439	0.642857	0.571429	0.625	0.734375	0.762238	0.615385	0.73487	0.647787
1200	0.926829	0.607143	0.571429	0.5625	0.765625	0.762238	0.461538	0.729107	0.636386
1210	0.829268	0.642857	0.642857	0.5	0.6875	0.825175	0.692308	0.743516	0.654972
1220	0.95122	0.714286	0.571429	0.625	0.734375	0.783217	0.384615	0.752161	0.667608
1230	0.95122	0.642857	0.5	0.5	0.625	0.832168	0.384615	0.731988	0.63788
1240	0.878049	0.732143	0.571429	0.4375	0.734375	0.825175	0.538462	0.760807	0.676915
1250	0.926829	0.625	0.642857	0.5625	0.765625	0.769231	0.538462	0.740634	0.652704
1260	0.95122	0.696429	0.714286	0.5	0.703125	0.776224	0.615385	0.74928	0.663113
1270	0.95122	0.714286	0.642857	0.6875	0.71875	0.783217	0.615385	0.763689	0.684723
1280	0.853659	0.714286	0.428571	0.625	0.75	0.804196	0.538462	0.752161	0.667718
1290	0.926829	0.625	0.5	0.625	0.71875	0.818182	0.538462	0.74928	0.661186
1300	0.902439	0.625	0.571429	0.5625	0.796875	0.79021	0.615385	0.752161	0.667032
1310	0.902439	0.589286	0.642857	0.8125	0.78125	0.79021	0.615385	0.757925	0.675631
1320	0.878049	0.553571	0.642857	0.4375	0.75	0.797203	0.384615	0.720461	0.621058
1330	0.853659	0.553571	0.642857	0.625	0.734375	0.839161	0.461538	0.743516	0.653451
1340	0.95122	0.678571	0.5	0.5625	0.640625	0.797203	0.538462	0.73487	0.643919
1350	0.902439	0.696429	0.5	0.625	0.703125	0.818182	0.538462	0.755043	0.672714
1360	0.926829	0.660714	0.5	0.5625	0.703125	0.818182	0.538462	0.74928	0.660795
1370	0.853659	0.607143	0.642857	0.375	0.640625	0.804196	0.461538	0.708934	0.60673
1380	0.926829	0.696429	0.571429	0.5625	0.59375	0.811189	0.384615	0.729107	0.636
1390	0.902439	0.571429	0.5	0.5625	0.75	0.769231	0.692308	0.726225	0.632992
1400	0.878049	0.642857	0.642857	0.625	0.78125	0.79021	0.384615	0.746398	0.658966
1410	0.926829	0.714286	0.571429	0.625	0.671875	0.846154	0.538462	0.769452	0.689417
1420	0.853659	0.571429	0.5	0.6875	0.703125	0.79021	0.538462	0.720461	0.624311
1430	0.878049	0.642857	0.642857	0.75	0.75	0.804196	0.461538	0.755043	0.67165
1440	0.878049	0.642857	0.5	0.5	0.71875	0.818182	0.538462	0.740634	0.651796
1450	0.878049	0.642857	0.785714	0.5625	0.6875	0.825175	0.538462	0.752161	0.666012
1460	0.926829	0.732143	0.571429	0.625	0.71875	0.741259	0.384615	0.731988	0.644889
1470	0.878049	0.696429	0.642857	0.5	0.734375	0.811189	0.461538	0.752161	0.667739
1480	0.902439	0.625	0.714286	0.5	0.671875	0.797203	0.538462	0.731988	0.638353
1490	0.902439	0.553571	0.714286	0.5	0.734375	0.783217	0.692308	0.731988	0.639196
1500	0.926829	0.625	0.428571	0.625	0.703125	0.825175	0.461538	0.743516	0.655186
1510	0.95122	0.642857	0.5	0.625	0.703125	0.79021	0.461538	0.737752	0.647082
1520	0.926829	0.553571	0.5	0.5	0.75	0.762238	0.615385	0.717579	0.621103
1530	0.902439	0.642857	0.642857	0.375	0.71875	0.783217	0.769231	0.737752	0.648599
1540	0.878049	0.660714	0.642857	0.625	0.671875	0.797203	0.538462	0.737752	0.648584
1550	0.926829	0.607143	0.642857	0.75	0.625	0.762238	0.692308	0.723343	0.631468
1560	0.853659	0.5	0.642857	0.6875	0.65625	0.804196	0.538462	0.711816	0.610836
1570	0.853659	0.607143	0.428571	0.5	0.6875	0.79021	0.461538	0.708934	0.607864
1580	0.878049	0.642857	0.428571	0.5625	0.71875	0.776224	0.461538	0.720461	0.625259
1590	0.926829	0.678571	0.5	0.5625	0.703125	0.776224	0.461538	0.731988	0.639619
1600	0.902439	0.571429	0.714286	0.625	0.703125	0.769231	0.307692	0.714697	0.616405
1610	0.829268	0.446429	0.714286	0.1875	0.5625	0.734266	0.692308	0.639769	0.516315
1620	0.853659	0.678571	0.428571	0.625	0.609375	0.769231	0.615385	0.708934	0.612222
1630	0.878049	0.660714	0.642857	0.6875	0.71875	0.797203	0.615385	0.752161	0.667903
1640	0.756098	0.660714	0.5	0.75	0.71875	0.776224	0.538462	0.723343	0.631043
1650	0.902439	0.553571	0.571429	0.4375	0.765625	0.755245	0.461538	0.708934	0.608518
1660	0.829268	0.660714	0.642857	0.4375	0.703125	0.741259	0.615385	0.708934	0.615709
1670	0.878049	0.607143	0.714286	0.375	0.796875	0.783217	0.538462	0.737752	0.648575
1680	0.902439	0.625	0.714286	0.625	0.6875	0.762238	0.615385	0.729107	0.639258
1690	0.853659	0.696429	0.642857	0.75	0.71875	0.811189	0.461538	0.757925	0.679326
1700	0.853659	0.732143	0.571429	0.625	0.640625	0.762238	0.769231	0.731988	0.645807
1710	0.902439	0.660714	0.642857	0.5	0.734375	0.755245	0.538462	0.729107	0.641935
1720	0.829268	0.553571	0.428571	0.5	0.640625	0.727273	0.538462	0.665706	0.557229
1730	0.804878	0.571429	0.857143	0.5625	0.84375	0.776224	0.538462	0.743516	0.658766
1740	0.780488	0.678571	0.714286	0.5625	0.640625	0.713287	0.461538	0.685879	0.587763
1750	0.878049	0.553571	0.5	0.75	0.71875	0.713287	0.692308	0.700288	0.603331
1760	0.853659	0.625	0.642857	0.625	0.703125	0.762238	0.615385	0.723343	0.633193
1770	0.902439	0.642857	0.642857	0.625	0.703125	0.755245	0.384615	0.720461	0.626397
1780	0.829268	0.642857	0.714286	0.4375	0.75	0.748252	0.538462	0.717579	0.623645
1790	0.878049	0.589286	0.714286	0.5625	0.65625	0.727273	0.538462	0.694524	0.593776
1800	0.829268	0.678571	0.642857	0.5625	0.65625	0.748252	0.615385	0.711816	0.617974
1810	0.853659	0.660714	0.714286	0.5	0.765625	0.769231	0.692308	0.743516	0.659214
1820	0.804878	0.5	0.5	0.4375	0.75	0.776224	0.692308	0.700288	0.599107
1830	0.804878	0.714286	0.571429	0.5625	0.671875	0.811189	0.461538	0.73487	0.646732
1840	0.829268	0.625	0.571429	0.5625	0.734375	0.804196	0.692308	0.740634	0.654759
1850	0.902439	0.642857	0.642857	0.6875	0.75	0.713287	0.538462	0.720461	0.631579
1860	0.878049	0.571429	0.571429	0.625	0.65625	0.79021	0.461538	0.711816	0.612559
1870	0.902439	0.607143	0.428571	0.4375	0.65625	0.79021	0.615385	0.711816	0.614635
1880	0.804878	0.571429	0.5	0.6875	0.703125	0.797203	0.307692	0.708934	0.611265
1890	0.780488	0.517857	0.642857	0.4375	0.703125	0.748252	0.615385	0.682997	0.574669
1900	0.853659	0.696429	0.357143	0.6875	0.71875	0.727273	0.538462	0.711816	0.619355
1910	0.878049	0.714286	0.642857	0.5	0.71875	0.79021	0.384615	0.740634	0.652231
1920	0.853659	0.571429	0.571429	0.375	0.78125	0.769231	0.615385	0.717579	0.62433
1930	0.853659	0.678571	0.714286	0.625	0.671875	0.755245	0.461538	0.720461	0.628179
1940	0.902439	0.625	0.5	0.3125	0.703125	0.755245	0.692308	0.708934	0.609836
1950	0.756098	0.678571	0.357143	0.5625	0.65625	0.776224	0.538462	0.700288	0.602987
1960	0.878049	0.625	0.785714	0.75	0.71875	0.755245	0.538462	0.73487	0.647792
1970	0.902439	0.517857	0.714286	0.5625	0.671875	0.79021	0.692308	0.720461	0.627735
1980	0.853659	0.625	0.714286	0.375	0.8125	0.741259	0.615385	0.726225	0.639865
1990	0.829268	0.553571	0.571429	0.3125	0.734375	0.741259	0.538462	0.685879	0.583416
2000	0.804878	0.678571	0.571429	0.5	0.65625	0.804196	0.615385	0.726225	0.634536
2010	0.780488	0.642857	0.714286	0.4375	0.734375	0.762238	0.461538	0.711816	0.619095
2020	0.853659	0.625	0.857143	0.4375	0.671875	0.783217	0.615385	0.726225	0.63421
2030	0.878049	0.517857	0.571429	0.375	0.65625	0.846154	0.538462	0.717579	0.61776
2040	0.878049	0.696429	0.571429	0.5625	0.6875	0.72028	0.538462	0.708934	0.615586
2050	0.829268	0.607143	0.571429	0.625	0.71875	0.79021	0.538462	0.726225	0.634598
2060	0.707317	0.660714	0.785714	0.625	0.703125	0.72028	0.692308	0.70317	0.611262
2070	0.756098	0.607143	0.357143	0.5625	0.703125	0.818182	0.769231	0.723343	0.630373
2080	0.804878	0.714286	0.785714	0.4375	0.71875	0.783217	0.461538	0.73487	0.650499
2090	0.829268	0.660714	0.571429	0.4375	0.703125	0.769231	0.461538	0.711816	0.613855
2100	0.853659	0.517857	0.714286	0.625	0.6875	0.748252	0.615385	0.700288	0.601642
2110	0.853659	0.625	0.5	0.5	0.703125	0.755245	0.461538	0.70317	0.606286
2120	0.878049	0.535714	0.428571	0.375	0.75	0.804196	0.692308	0.720461	0.623387
2130	0.829268	0.660714	0.428571	0.625	0.734375	0.804196	0.692308	0.743516	0.661291
2140	0.829268	0.410714	0.642857	0.5625	0.828125	0.769231	0.692308	0.711816	0.612649
2150	0.853659	0.607143	0.714286	0.5625	0.734375	0.769231	0.615385	0.729107	0.641854
2160	0.780488	0.589286	0.642857	0.3125	0.703125	0.741259	0.307692	0.674352	0.564897
2170	0.829268	0.678571	0.5	0.5625	0.75	0.741259	0.538462	0.717579	0.627658
2180	0.804878	0.625	0.571429	0.6875	0.71875	0.762238	0.846154	0.729107	0.639752
2190	0.853659	0.75	0.571429	0.6875	0.71875	0.79021	0.230769	0.743516	0.659232
2200	0.829268	0.571429	0.714286	0.625	0.796875	0.769231	0.692308	0.737752	0.651722
2210	0.853659	0.767857	0.571429	0.625	0.671875	0.769231	0.538462	0.737752	0.652449
2220	0.804878	0.625	0.571429	0.5	0.859375	0.748252	0.384615	0.723343	0.635194
2230	0.853659	0.625	0.5	0.6875	0.765625	0.706294	0.538462	0.706052	0.612009
2240	0.902439	0.660714	0.714286	0.5625	0.71875	0.79021	0.615385	0.74928	0.665899
2250	0.926829	0.660714	0.571429	0.625	0.703125	0.769231	0.538462	0.73487	0.647019
2260	0.853659	0.607143	0.642857	0.625	0.703125	0.755245	0.461538	0.711816	0.618694
2270	0.804878	0.75	0.642857	0.5625	0.734375	0.79021	0.538462	0.74928	0.670671
2280	0.829268	0.696429	0.571429	0.4375	0.703125	0.79021	0.538462	0.729107	0.637729
2290	0.804878	0.625	0.5	0.625	0.671875	0.699301	0.538462	0.677233	0.572738
2300	0.829268	0.625	0.714286	0.375	0.6875	0.727273	0.615385	0.694524	0.596119
2310	0.780488	0.625	0.642857	0.6875	0.703125	0.741259	0.615385	0.708934	0.615998
2320	0.804878	0.589286	0.642857	0.5	0.671875	0.86014	0.692308	0.743516	0.655205
2330	0.804878	0.696429	0.571429	0.5625	0.578125	0.734266	0.692308	0.691643	0.594014
2340	0.853659	0.696429	0.428571	0.625	0.71875	0.79021	0.615385	0.740634	0.654523
2350	0.804878	0.625	0.571429	0.625	0.6875	0.734266	0.615385	0.700288	0.603711
2360	0.853659	0.696429	0.642857	0.625	0.6875	0.734266	0.461538	0.714697	0.624916
2370	0.780488	0.732143	0.571429	0.5	0.84375	0.776224	0.615385	0.755043	0.677168
2380	0.853659	0.696429	0.357143	0.75	0.78125	0.776224	0.461538	0.743516	0.659482
2390	0.829268	0.571429	0.428571	0.8125	0.703125	0.734266	0.615385	0.700288	0.605474
2400	0.853659	0.660714	0.642857	0.625	0.71875	0.783217	0.538462	0.737752	0.651363
2410	0.878049	0.642857	0.642857	0.75	0.71875	0.797203	0.769231	0.757925	0.677962
2420	0.804878	0.607143	0.571429	0.625	0.78125	0.72028	0.615385	0.708934	0.618439
2430	0.829268	0.625	0.428571	0.625	0.71875	0.741259	0.615385	0.706052	0.610713
2440	0.780488	0.642857	0.571429	0.6875	0.65625	0.734266	0.692308	0.700288	0.604943
2450	0.804878	0.696429	0.5	0.625	0.71875	0.755245	0.769231	0.729107	0.642218
2460	0.878049	0.696429	0.571429	0.625	0.640625	0.804196	0.615385	0.740634	0.654039
2470	0.804878	0.571429	0.642857	0.5	0.71875	0.797203	0.615385	0.720461	0.62514
2480	0.829268	0.696429	0.714286	0.5625	0.703125	0.762238	0.461538	0.726225	0.638387
2490	0.829268	0.571429	0.571429	0.375	0.703125	0.797203	0.538462	0.708934	0.609922
2500	0.829268	0.642857	0.571429	0.625	0.671875	0.783217	0.615385	0.723343	0.629201
2510	0.804878	0.589286	0.428571	0.625	0.765625	0.776224	0.615385	0.720461	0.626693
2520	0.878049	0.732143	0.714286	0.6875	0.75	0.755245	0.538462	0.752161	0.67527
2530	0.853659	0.678571	0.571429	0.375	0.703125	0.657343	0.615385	0.674352	0.577168
2540	0.878049	0.589286	0.642857	0.6875	0.703125	0.734266	0.615385	0.711816	0.618495
2550	0.902439	0.607143	0.642857	0.5625	0.703125	0.755245	0.692308	0.723343	0.632168
2560	0.780488	0.678571	0.642857	0.8125	0.71875	0.755245	0.461538	0.726225	0.638638
2570	0.97561	0.589286	0.714286	0.5	0.703125	0.748252	0.538462	0.720461	0.628313
2580	0.902439	0.517857	0.5	0.625	0.796875	0.804196	0.538462	0.737752	0.647057
2590	0.853659	0.660714	0.5	0.625	0.703125	0.762238	0.538462	0.720461	0.628994
2600	0.926829	0.553571	0.571429	0.3125	0.625	0.72028	0.692308	0.674352	0.566746
2610	0.804878	0.607143	0.5	0.5625	0.671875	0.776224	0.538462	0.70317	0.603048
2620	0.902439	0.607143	0.5	0.6875	0.703125	0.769231	0.461538	0.720461	0.629876
2630	0.829268	0.571429	0.642857	0.5	0.734375	0.783217	0.461538	0.714697	0.617807
2640	0.853659	0.607143	0.714286	0.6875	0.734375	0.811189	0.692308	0.755043	0.672409
2650	0.829268	0.660714	0.571429	0.625	0.71875	0.769231	0.615385	0.729107	0.640282
2660	0.902439	0.607143	0.642857	0.6875	0.71875	0.776224	0.384615	0.729107	0.637918
2670	0.902439	0.607143	0.642857	0.625	0.6875	0.762238	0.538462	0.720461	0.627908
2680	0.926829	0.625	0.571429	0.625	0.6875	0.762238	0.307692	0.714697	0.618823
2690	0.829268	0.678571	0.571429	0.6875	0.78125	0.783217	0.692308	0.755043	0.674548
2700	0.853659	0.642857	0.5	0.6875	0.703125	0.783217	0.615385	0.731988	0.641434
2710	0.902439	0.589286	0.714286	0.5625	0.703125	0.755245	0.538462	0.717579	0.623539
2720	0.829268	0.660714	0.5	0.625	0.78125	0.79021	0.461538	0.740634	0.657037
2730	0.878049	0.732143	0.5	0.5625	0.65625	0.776224	0.615385	0.731988	0.645512
2740	0.829268	0.625	0.5	0.25	0.75	0.762238	0.461538	0.700288	0.598715
2750	0.926829	0.678571	0.357143	0.5	0.765625	0.734266	0.538462	0.720461	0.629156
2760	0.829268	0.660714	0.642857	0.4375	0.703125	0.734266	0.538462	0.70317	0.605694
2770	0.878049	0.553571	0.428571	0.8125	0.640625	0.755245	0.538462	0.697406	0.595719
2780	0.926829	0.589286	0.5	0.5625	0.78125	0.776224	0.769231	0.743516	0.659041
2790	0.853659	0.607143	0.642857	0.5625	0.734375	0.769231	0.615385	0.726225	0.635824
2800	0.853659	0.678571	0.714286	0.75	0.6875	0.699301	0.538462	0.708934	0.61917
2810	0.829268	0.607143	0.714286	0.6875	0.703125	0.776224	0.692308	0.731988	0.644007
2820	0.756098	0.696429	0.571429	0.5	0.71875	0.776224	0.615385	0.723343	0.63316
2830	0.853659	0.767857	0.428571	0.75	0.78125	0.755245	0.692308	0.757925	0.683238
2840	0.829268	0.660714	0.642857	0.625	0.671875	0.783217	0.615385	0.729107	0.640242
2850	0.902439	0.642857	0.642857	0.5	0.71875	0.776224	0.615385	0.73487	0.648544
2860	0.829268	0.589286	0.5	0.625	0.6875	0.755245	0.692308	0.706052	0.609516
2870	0.829268	0.696429	0.642857	0.5625	0.71875	0.762238	0.461538	0.726225	0.634901
2880	0.829268	0.625	0.714286	0.625	0.765625	0.769231	0.692308	0.740634	0.654362
2890	0.95122	0.714286	0.428571	0.375	0.703125	0.748252	0.384615	0.714697	0.620632
2900	0.829268	0.607143	0.428571	0.6875	0.671875	0.79021	0.692308	0.720461	0.6279
2910	0.853659	0.571429	0.571429	0.3125	0.71875	0.797203	0.615385	0.714697	0.616748
2920	0.780488	0.642857	0.357143	0.5	0.8125	0.804196	0.615385	0.737752	0.650555
2930	0.829268	0.678571	0.571429	0.5	0.625	0.783217	0.461538	0.708934	0.611247
2940	0.829268	0.696429	0.428571	0.75	0.640625	0.727273	0.538462	0.700288	0.60477
2950	0.804878	0.589286	0.571429	0.6875	0.75	0.79021	0.615385	0.731988	0.641681
2960	0.829268	0.607143	0.642857	0.75	0.703125	0.741259	0.307692	0.70317	0.606582
2970	0.829268	0.696429	0.571429	0.5625	0.6875	0.818182	0.615385	0.746398	0.663715
2980	0.878049	0.535714	0.5	0.5625	0.703125	0.748252	0.461538	0.691643	0.588064
2990	0.829268	0.607143	0.642857	0.5	0.734375	0.762238	0.769231	0.723343	0.632299
3000	0.853659	0.589286	0.571429	0.6875	0.71875	0.818182	0.692308	0.746398	0.660162
3010	0.804878	0.642857	0.571429	0.625	0.765625	0.783217	0.538462	0.73487	0.647626
3020	0.853659	0.625	0.571429	0.75	0.640625	0.706294	0.615385	0.691643	0.591982
3030	0.853659	0.642857	0.357143	0.625	0.65625	0.748252	0.538462	0.697406	0.599378
3040	0.926829	0.642857	0.714286	0.4375	0.671875	0.811189	0.615385	0.743516	0.657118
3050	0.756098	0.642857	0.571429	0.625	0.75	0.769231	0.692308	0.726225	0.639249
3060	0.780488	0.571429	0.5	0.375	0.625	0.79021	0.538462	0.682997	0.575846
3070	0.878049	0.660714	0.571429	0.5625	0.734375	0.734266	0.538462	0.717579	0.625399
3080	0.902439	0.535714	0.642857	0.625	0.71875	0.79021	0.461538	0.723343	0.630064
3090	0.902439	0.696429	0.642857	0.625	0.703125	0.776224	0.615385	0.746398	0.661309
3100	0.780488	0.607143	0.642857	0.5	0.6875	0.734266	0.461538	0.685879	0.587759
3110	0.780488	0.625	0.642857	0.625	0.703125	0.769231	0.769231	0.723343	0.634546
3120	0.853659	0.678571	0.428571	0.5625	0.765625	0.825175	0.538462	0.755043	0.671561
3130	0.853659	0.660714	0.642857	0.5	0.6875	0.776224	0.692308	0.729107	0.641257
3140	0.829268	0.589286	0.714286	0.625	0.703125	0.783217	0.384615	0.717579	0.622747
3150	0.853659	0.589286	0.642857	0.5625	0.671875	0.727273	0.538462	0.691643	0.591765
3160	0.902439	0.589286	0.642857	0.75	0.734375	0.776224	0.384615	0.731988	0.641081
3170	0.902439	0.553571	0.571429	0.5625	0.765625	0.755245	0.615385	0.720461	0.627062
3180	0.829268	0.589286	0.642857	0.4375	0.765625	0.769231	0.384615	0.711816	0.617213
3190	0.829268	0.571429	0.571429	0.5	0.625	0.769231	0.538462	0.688761	0.58503
3200	0.829268	0.589286	0.642857	0.6875	0.703125	0.748252	0.615385	0.711816	0.617174
3210	0.878049	0.589286	0.714286	0.5625	0.71875	0.797203	0.307692	0.726225	0.633302
3220	0.902439	0.696429	0.642857	0.5625	0.78125	0.755245	0.769231	0.755043	0.674309
3230	0.95122	0.571429	0.5	0.5625	0.75	0.769231	0.538462	0.726225	0.631991
3240	0.902439	0.625	0.5	0.625	0.734375	0.755245	0.461538	0.720461	0.626958
3250	0.804878	0.642857	0.714286	0.375	0.703125	0.804196	0.615385	0.729107	0.636149
3260	0.926829	0.678571	0.571429	0.5625	0.734375	0.769231	0.615385	0.743516	0.659348
3270	0.878049	0.660714	0.642857	0.625	0.71875	0.797203	0.461538	0.743516	0.655339
3280	0.853659	0.678571	0.357143	0.4375	0.8125	0.762238	0.384615	0.723343	0.632287
3290	0.878049	0.696429	0.714286	0.3125	0.625	0.762238	0.692308	0.714697	0.617919
3300	0.853659	0.589286	0.428571	0.375	0.796875	0.783217	0.384615	0.714697	0.615016
3310	0.878049	0.678571	0.642857	0.5625	0.6875	0.79021	0.692308	0.743516	0.657264
3320	0.902439	0.607143	0.642857	0.5625	0.75	0.755245	0.461538	0.723343	0.632049
3330	0.95122	0.696429	0.571429	0.4375	0.734375	0.783217	0.384615	0.740634	0.653588
3340	0.95122	0.714286	0.571429	0.5625	0.859375	0.804196	0.615385	0.789625	0.721307
3350	0.902439	0.696429	0.5	0.375	0.765625	0.79021	0.692308	0.74928	0.666229
3360	0.878049	0.589286	0.5	0.375	0.765625	0.797203	0.615385	0.729107	0.633612
3370	0.902439	0.642857	0.714286	0.5625	0.703125	0.783217	0.538462	0.737752	0.646343
3380	0.878049	0.625	0.642857	0.6875	0.6875	0.832168	0.461538	0.74928	0.662759
3390	0.804878	0.589286	0.428571	0.625	0.65625	0.706294	0.692308	0.674352	0.56839
3400	0.902439	0.714286	0.428571	0.5	0.765625	0.769231	0.538462	0.740634	0.654413
3410	0.97561	0.607143	0.642857	0.4375	0.6875	0.811189	0.384615	0.73487	0.641452
3420	0.853659	0.714286	0.428571	0.6875	0.78125	0.804196	0.538462	0.760807	0.681928
3430	0.780488	0.589286	0.571429	0.5	0.703125	0.727273	0.615385	0.685879	0.580453
3440	0.878049	0.642857	0.571429	0.5625	0.75	0.727273	0.769231	0.723343	0.634938
3450	0.878049	0.642857	0.571429	0.5625	0.75	0.79021	0.461538	0.737752	0.649053
3460	0.853659	0.642857	0.642857	0.5	0.765625	0.783217	0.615385	0.740634	0.653173
3470	0.804878	0.732143	0.5	0.4375	0.71875	0.811189	0.538462	0.740634	0.652382
3480	0.853659	0.660714	0.642857	0.5	0.765625	0.811189	0.769231	0.760807	0.679815
3490	0.926829	0.607143	0.5	0.6875	0.703125	0.825175	0.692308	0.755043	0.670484
3500	0.853659	0.767857	0.5	0.625	0.75	0.846154	0.538462	0.78098	0.706831
3510	0.878049	0.607143	0.714286	0.8125	0.671875	0.804196	0.461538	0.740634	0.652736
3520	0.853659	0.571429	0.357143	0.75	0.671875	0.776224	0.538462	0.706052	0.606554
3530	0.95122	0.660714	0.5	0.625	0.671875	0.741259	0.692308	0.723343	0.631222
3540	0.878049	0.642857	0.571429	0.4375	0.6875	0.818182	0.615385	0.737752	0.646262
3550	0.878049	0.714286	0.357143	0.5625	0.796875	0.783217	0.461538	0.746398	0.660762
3560	0.902439	0.607143	0.714286	0.625	0.71875	0.783217	0.769231	0.746398	0.659891
3570	0.853659	0.714286	0.357143	0.5625	0.640625	0.748252	0.615385	0.706052	0.6074
3580	0.902439	0.642857	0.428571	0.5625	0.734375	0.79021	0.538462	0.73487	0.644406
3590	0.878049	0.732143	0.642857	0.625	0.75	0.727273	0.384615	0.729107	0.645724
3600	0.853659	0.732143	0.642857	0.625	0.75	0.797203	0.692308	0.766571	0.688936
3610	0.878049	0.642857	0.5	0.6875	0.78125	0.769231	0.384615	0.73487	0.646881
3620	0.95122	0.642857	0.642857	0.6875	0.765625	0.804196	0.615385	0.769452	0.688713
3630	0.878049	0.678571	0.5	0.5	0.703125	0.741259	0.461538	0.708934	0.611308
3640	0.829268	0.75	0.5	0.6875	0.625	0.769231	0.384615	0.717579	0.626564
3650	0.878049	0.678571	0.571429	0.6875	0.71875	0.783217	0.538462	0.743516	0.657452
3660	0.829268	0.625	0.571429	0.625	0.734375	0.783217	0.538462	0.729107	0.639035
3670	0.878049	0.678571	0.428571	0.375	0.671875	0.811189	0.461538	0.723343	0.629307
3680	0.926829	0.607143	0.5	0.375	0.765625	0.818182	0.615385	0.746398	0.658006
3690	0.926829	0.642857	0.642857	0.5625	0.796875	0.769231	0.615385	0.752161	0.669346
3700	0.829268	0.696429	0.285714	0.6875	0.578125	0.797203	0.615385	0.711816	0.615585
3710	0.878049	0.642857	0.5	0.5625	0.734375	0.811189	0.461538	0.740634	0.651901
3720	0.878049	0.696429	0.642857	0.625	0.734375	0.741259	0.538462	0.731988	0.642705
3730	0.878049	0.642857	0.714286	0.6875	0.65625	0.776224	0.538462	0.729107	0.63907
3740	0.902439	0.625	0.5	0.5	0.703125	0.783217	0.615385	0.726225	0.630467
3750	0.902439	0.607143	0.571429	0.3125	0.75	0.804196	0.461538	0.729107	0.633919
3760	0.878049	0.535714	0.714286	0.5625	0.71875	0.818182	0.769231	0.743516	0.656349
3770	0.829268	0.660714	0.5	0.5	0.75	0.741259	0.615385	0.714697	0.619971
3780	0.853659	0.678571	0.571429	0.625	0.78125	0.755245	0.692308	0.743516	0.66093
3790	0.926829	0.767857	0.142857	0.6875	0.75	0.762238	0.615385	0.746398	0.664561
3800	0.829268	0.607143	0.571429	0.75	0.734375	0.79021	0.769231	0.743516	0.657942
3810	0.829268	0.625	0.642857	0.75	0.703125	0.825175	0.615385	0.752161	0.667348
3820	0.804878	0.607143	0.642857	0.375	0.71875	0.755245	0.384615	0.694524	0.590409
3830	0.878049	0.642857	0.5	0.6875	0.734375	0.741259	0.615385	0.723343	0.635083
3840	0.902439	0.732143	0.642857	0.4375	0.6875	0.741259	0.384615	0.717579	0.62538
3850	0.926829	0.5	0.5	0.4375	0.765625	0.783217	0.769231	0.723343	0.6271
3860	0.853659	0.642857	0.357143	0.5625	0.75	0.741259	0.615385	0.711816	0.6174
3870	0.926829	0.678571	0.571429	0.75	0.703125	0.762238	0.230769	0.729107	0.639163
3880	0.97561	0.553571	0.642857	0.625	0.765625	0.72028	0.461538	0.714697	0.618018
3890	0.878049	0.678571	0.714286	0.75	0.765625	0.755245	0.538462	0.74928	0.666102
3900	0.853659	0.589286	0.5	0.5625	0.734375	0.804196	0.384615	0.723343	0.626169
3910	0.829268	0.589286	0.571429	0.625	0.71875	0.699301	0.692308	0.691643	0.595141
3920	0.95122	0.696429	0.714286	0.6875	0.765625	0.755245	0.615385	0.760807	0.681499
3930	0.829268	0.642857	0.571429	0.625	0.765625	0.769231	0.538462	0.731988	0.643733
3940	0.853659	0.625	0.357143	0.625	0.5625	0.776224	0.384615	0.682997	0.574975
3950	0.926829	0.696429	0.642857	0.625	0.703125	0.79021	0.538462	0.752161	0.669066
3960	0.878049	0.625	0.642857	0.5625	0.6875	0.797203	0.461538	0.729107	0.636024
3970	0.731707	0.553571	0.357143	0.5	0.703125	0.804196	0.615385	0.697406	0.594189
3980	0.853659	0.589286	0.428571	0.625	0.75	0.804196	0.538462	0.731988	0.640178
3990	0.902439	0.660714	0.571429	0.625	0.78125	0.748252	0.461538	0.73487	0.645835
4000	0.926829	0.660714	0.5	0.375	0.75	0.832168	0.615385	0.757925	0.672647
4010	0.926829	0.660714	0.5	0.5625	0.71875	0.86014	0.615385	0.772334	0.691879
4020	0.829268	0.678571	0.642857	0.625	0.6875	0.811189	0.538462	0.743516	0.657445
4030	0.902439	0.678571	0.642857	0.4375	0.703125	0.846154	0.538462	0.760807	0.6784
4040	0.902439	0.535714	0.5	0.5	0.796875	0.776224	0.461538	0.720461	0.623342
4050	0.829268	0.589286	0.714286	0.625	0.65625	0.755245	0.692308	0.708934	0.610406
4060	0.878049	0.660714	0.714286	0.5	0.703125	0.818182	0.461538	0.746398	0.659257
4070	0.829268	0.678571	0.285714	0.8125	0.75	0.797203	0.615385	0.746398	0.66218
4080	0.878049	0.696429	0.571429	0.4375	0.71875	0.804196	0.615385	0.746398	0.659067
4090	0.878049	0.625	0.5	0.6875	0.703125	0.734266	0.615385	0.711816	0.617294
4100	0.853659	0.607143	0.571429	0.375	0.734375	0.79021	0.461538	0.717579	0.620804
4110	0.902439	0.589286	0.714286	0.25	0.71875	0.811189	0.769231	0.737752	0.646429
4120	0.878049	0.625	0.5	0.5625	0.765625	0.755245	0.846154	0.73487	0.646665
4130	0.829268	0.678571	0.5	0.6875	0.609375	0.769231	0.615385	0.711816	0.61383
4140	0.780488	0.660714	0.5	0.5625	0.640625	0.727273	0.615385	0.685879	0.584464
4150	0.853659	0.571429	0.428571	0.6875	0.75	0.741259	0.692308	0.711816	0.614184
4160	0.878049	0.785714	0.642857	0.5	0.65625	0.748252	0.846154	0.740634	0.655588
4170	0.902439	0.642857	0.5	0.625	0.78125	0.776224	0.461538	0.740634	0.655203
4180	0.878049	0.678571	0.785714	0.5625	0.734375	0.671329	0.692308	0.708934	0.621019
4190	0.878049	0.678571	0.428571	0.4375	0.71875	0.769231	0.307692	0.711816	0.612518
4200	0.902439	0.589286	0.714286	0.5625	0.8125	0.79021	0.692308	0.757925	0.676206
4210	0.853659	0.607143	0.571429	0.6875	0.75	0.727273	0.769231	0.720461	0.629108
4220	0.878049	0.696429	0.642857	0.5625	0.6875	0.748252	0.538462	0.723343	0.629722
4230	0.926829	0.571429	0.571429	0.4375	0.671875	0.804196	0.461538	0.717579	0.617843
4240	0.804878	0.553571	0.428571	0.375	0.78125	0.741259	0.461538	0.685879	0.579659
4250	0.902439	0.589286	0.571429	0.4375	0.703125	0.818182	0.384615	0.726225	0.630818
4260	0.804878	0.607143	0.428571	0.6875	0.625	0.846154	0.384615	0.720461	0.621408
4270	0.829268	0.660714	0.571429	0.6875	0.640625	0.79021	0.769231	0.731988	0.64237
4280	0.829268	0.732143	0.5	0.75	0.6875	0.727273	0.384615	0.711816	0.616261
4290	0.95122	0.625	0.428571	0.75	0.734375	0.79021	0.461538	0.743516	0.654619
4300	0.829268	0.607143	0.357143	0.5625	0.765625	0.755245	0.461538	0.706052	0.607461
4310	0.902439	0.607143	0.642857	0.5625	0.703125	0.776224	0.384615	0.720461	0.625347
4320	0.926829	0.589286	0.571429	0.375	0.734375	0.818182	0.461538	0.73487	0.642722
4330	0.853659	0.732143	0.5	0.5	0.765625	0.72028	0.615385	0.723343	0.637588
4340	0.902439	0.696429	0.571429	0.6875	0.671875	0.734266	0.461538	0.717579	0.625168
4350	0.926829	0.678571	0.428571	0.625	0.65625	0.825175	0.615385	0.74928	0.664167
4360	0.878049	0.696429	0.571429	0.6875	0.640625	0.776224	0.461538	0.726225	0.635769
4370	0.878049	0.553571	0.571429	0.6875	0.765625	0.804196	0.692308	0.746398	0.661038
4380	0.853659	0.589286	0.714286	0.5	0.796875	0.776224	0.538462	0.73487	0.644743
4390	0.878049	0.589286	0.428571	0.5625	0.734375	0.797203	0.461538	0.723343	0.626133
4400	0.853659	0.678571	0.642857	0.375	0.75	0.804196	0.461538	0.740634	0.651312
4410	0.829268	0.625	0.642857	0.6875	0.765625	0.769231	0.384615	0.729107	0.639438
4420	0.829268	0.678571	0.785714	0.625	0.78125	0.776224	0.692308	0.757925	0.677948
4430	0.95122	0.553571	0.357143	0.75	0.71875	0.797203	0.615385	0.73487	0.643717
4440	0.902439	0.625	0.5	0.5625	0.71875	0.839161	0.461538	0.74928	0.662837
4450	0.878049	0.714286	0.785714	0.5	0.78125	0.79021	0.615385	0.766571	0.689842
4460	0.926829	0.553571	0.571429	0.6875	0.78125	0.741259	0.307692	0.714697	0.617345
4470	0.902439	0.642857	0.642857	0.625	0.75	0.818182	0.692308	0.766571	0.688877
4480	0.853659	0.642857	0.428571	0.625	0.640625	0.783217	0.615385	0.714697	0.617041
4490	0.829268	0.660714	0.571429	0.5625	0.6875	0.783217	0.615385	0.726225	0.633237
4500	0.878049	0.642857	0.571429	0.5	0.734375	0.811189	0.692308	0.74928	0.663857
4510	0.902439	0.625	0.714286	0.625	0.75	0.727273	0.461538	0.720461	0.627064
4520	0.926829	0.660714	0.357143	0.625	0.65625	0.713287	0.615385	0.697406	0.598497
4530	0.853659	0.625	0.214286	0.5	0.734375	0.755245	0.538462	0.700288	0.60007
4540	0.853659	0.660714	0.571429	0.5	0.703125	0.776224	0.307692	0.714697	0.619045
4550	0.926829	0.642857	0.5	0.5625	0.703125	0.776224	0.307692	0.720461	0.626645
4560	0.853659	0.660714	0.5	0.6875	0.734375	0.811189	0.384615	0.743516	0.656207
4570	0.878049	0.571429	0.642857	0.625	0.84375	0.811189	0.461538	0.757925	0.673354
4580	0.853659	0.714286	0.357143	0.5625	0.65625	0.811189	0.692308	0.737752	0.648087
4590	0.853659	0.625	0.785714	0.5	0.71875	0.797203	0.461538	0.73487	0.643886
4600	0.926829	0.642857	0.357143	0.6875	0.6875	0.769231	0.615385	0.726225	0.637006
4610	0.902439	0.642857	0.285714	0.6875	0.71875	0.811189	0.307692	0.731988	0.640568
4620	0.926829	0.625	0.5	0.6875	0.703125	0.734266	0.384615	0.708934	0.612211
4630	0.853659	0.75	0.571429	0.6875	0.6875	0.776224	0.384615	0.737752	0.65222
4640	0.878049	0.642857	0.571429	0.5	0.6875	0.762238	0.461538	0.711816	0.613744
4650	0.926829	0.696429	0.571429	0.625	0.640625	0.818182	0.538462	0.74928	0.663464
4660	0.878049	0.660714	0.571429	0.4375	0.734375	0.748252	0.615385	0.720461	0.626555
4670	0.902439	0.589286	0.571429	0.4375	0.765625	0.699301	0.538462	0.694524	0.59502
4680	0.902439	0.625	0.642857	0.8125	0.671875	0.776224	0.615385	0.737752	0.649107
4690	0.95122	0.625	0.642857	0.4375	0.78125	0.783217	0.307692	0.737752	0.647407
4700	0.926829	0.660714	0.5	0.6875	0.78125	0.783217	0.461538	0.752161	0.670537
4710	0.829268	0.75	0.428571	0.5625	0.640625	0.804196	0.307692	0.723343	0.630137
4720	0.878049	0.589286	0.357143	0.5	0.78125	0.79021	0.461538	0.723343	0.627615
4730	0.878049	0.714286	0.571429	0.375	0.703125	0.706294	0.538462	0.700288	0.605054
4740	0.902439	0.571429	0.428571	0.5625	0.65625	0.776224	0.692308	0.708934	0.609137
4750	0.926829	0.589286	0.5	0.4375	0.65625	0.678322	0.384615	0.659942	0.55009
4760	0.878049	0.642857	0.5	0.625	0.75	0.741259	0.538462	0.720461	0.628285
4770	0.853659	0.767857	0.5	0.4375	0.765625	0.769231	0.692308	0.74928	0.668728
4780	0.878049	0.553571	0.642857	0.6875	0.78125	0.699301	0.692308	0.708934	0.612912
4790	0.804878	0.625	0.428571	0.5625	0.640625	0.804196	0.615385	0.711816	0.614627
4800	0.902439	0.571429	0.357143	0.75	0.796875	0.79021	0.615385	0.743516	0.656777
4810	0.902439	0.625	0.642857	0.6875	0.6875	0.755245	0.538462	0.723343	0.633484
4820	0.829268	0.678571	0.428571	0.625	0.703125	0.741259	0.692308	0.714697	0.623556
4830	0.97561	0.732143	0.428571	0.625	0.6875	0.818182	0.307692	0.755043	0.670245
4840	0.926829	0.696429	0.571429	0.75	0.71875	0.825175	0.538462	0.772334	0.694423
4850	0.95122	0.660714	0.428571	0.5625	0.796875	0.783217	0.615385	0.755043	0.67072
4860	0.926829	0.642857	0.571429	0.5625	0.75	0.769231	0.384615	0.731988	0.641875
4870	0.902439	0.571429	0.5	0.4375	0.75	0.776224	0.461538	0.714697	0.61553
4880	0.853659	0.482143	0.642857	0.6875	0.703125	0.783217	0.538462	0.708934	0.609765
4890	0.853659	0.660714	0.571429	0.5625	0.734375	0.811189	0.615385	0.74928	0.663863
4900	0.804878	0.660714	0.5	0.5625	0.75	0.818182	0.769231	0.752161	0.666951
4910	0.902439	0.625	0.714286	0.4375	0.796875	0.783217	0.461538	0.743516	0.655121
4920	0.878049	0.553571	0.785714	0.4375	0.71875	0.818182	0.307692	0.726225	0.629723
4930	0.853659	0.535714	0.5	0.5625	0.734375	0.755245	0.615385	0.70317	0.59974
4940	0.878049	0.660714	0.5	0.375	0.703125	0.713287	0.538462	0.691643	0.587614
4950	0.853659	0.517857	0.5	0.625	0.71875	0.818182	0.538462	0.723343	0.625829
4960	0.926829	0.678571	0.571429	0.625	0.640625	0.741259	0.538462	0.714697	0.62305
4970	0.902439	0.642857	0.428571	0.5625	0.6875	0.755245	0.461538	0.708934	0.608512
4980	0.853659	0.607143	0.428571	0.6875	0.75	0.776224	0.307692	0.717579	0.620062
4990	0.829268	0.642857	0.642857	0.6875	0.703125	0.804196	0.615385	0.743516	0.655513
5000	0.878049	0.625	0.642857	0.5625	0.78125	0.804196	0.307692	0.743516	0.657049
5010	0.878049	0.589286	0.428571	0.3125	0.6875	0.769231	0.384615	0.688761	0.580304
5020	0.829268	0.714286	0.5	0.4375	0.65625	0.797203	0.615385	0.726225	0.631697
5030	0.829268	0.678571	0.5	0.625	0.765625	0.79021	0.384615	0.737752	0.648837
5040	0.878049	0.696429	0.571429	0.6875	0.734375	0.776224	0.461538	0.743516	0.657924
5050	0.829268	0.696429	0.642857	0.5625	0.765625	0.846154	0.846154	0.783862	0.710869
5060	0.902439	0.589286	0.571429	0.75	0.65625	0.839161	0.538462	0.746398	0.6584
5070	0.926829	0.75	0.428571	0.4375	0.75	0.748252	0.461538	0.731988	0.645005
5080	0.878049	0.571429	0.428571	0.5	0.6875	0.839161	0.461538	0.726225	0.628355
5090	0.853659	0.642857	0.571429	0.4375	0.796875	0.797203	0.538462	0.743516	0.657932
5100	0.829268	0.696429	0.571429	0.6875	0.703125	0.748252	0.615385	0.726225	0.636684
5110	0.878049	0.642857	0.5	0.5625	0.625	0.811189	0.538462	0.723343	0.628141
5120	0.97561	0.607143	0.428571	0.5	0.796875	0.804196	0.461538	0.74928	0.661429
5130	0.926829	0.642857	0.571429	0.625	0.71875	0.783217	0.461538	0.737752	0.648867
5140	0.878049	0.571429	0.428571	0.75	0.78125	0.776224	0.538462	0.731988	0.639966
5150	0.829268	0.589286	0.285714	0.375	0.796875	0.734266	0.461538	0.688761	0.583782
5160	0.853659	0.714286	0.785714	0.5625	0.671875	0.762238	0.538462	0.731988	0.643511
5170	0.780488	0.607143	0.5	0.4375	0.734375	0.755245	0.538462	0.697406	0.594959
5180	0.829268	0.571429	0.571429	0.5	0.734375	0.713287	0.615385	0.688761	0.584936
5190	0.780488	0.660714	0.571429	0.75	0.765625	0.797203	0.384615	0.740634	0.653497
5200	0.902439	0.625	0.5	0.6875	0.65625	0.748252	0.615385	0.711816	0.614723
5210	0.853659	0.660714	0.571429	0.4375	0.734375	0.755245	0.384615	0.711816	0.61607
5220	0.902439	0.482143	0.571429	0.5	0.71875	0.818182	0.538462	0.720461	0.621449
5230	0.829268	0.625	0.5	0.4375	0.75	0.762238	0.846154	0.723343	0.630802
5240	0.878049	0.607143	0.285714	0.6875	0.796875	0.762238	0.692308	0.731988	0.643171
5250	0.878049	0.607143	0.5	0.3125	0.71875	0.818182	0.615385	0.729107	0.635116
5260	0.926829	0.589286	0.642857	0.5	0.765625	0.797203	0.615385	0.746398	0.659163
5270	0.902439	0.535714	0.5	0.625	0.734375	0.797203	0.384615	0.720461	0.623554
5280	0.926829	0.571429	0.428571	0.6875	0.671875	0.832168	0.692308	0.743516	0.65427
5290	0.804878	0.625	0.714286	0.375	0.78125	0.818182	0.615385	0.746398	0.659076
5300	0.902439	0.571429	0.642857	0.6875	0.8125	0.72028	0.692308	0.729107	0.642231
5310	0.902439	0.767857	0.5	0.5625	0.734375	0.811189	0.615385	0.769452	0.691115
5320	0.878049	0.678571	0.5	0.6875	0.640625	0.776224	0.384615	0.717579	0.622277
5330	0.804878	0.553571	0.5	0.5625	0.703125	0.832168	0.615385	0.726225	0.631055
5340	0.902439	0.696429	0.714286	0.5	0.796875	0.797203	0.538462	0.766571	0.688521
5350	0.902439	0.482143	0.571429	0.5625	0.734375	0.762238	0.692308	0.708934	0.608194
5360	0.878049	0.714286	0.642857	0.375	0.71875	0.755245	0.769231	0.73487	0.647056
5370	0.756098	0.625	0.571429	0.5625	0.71875	0.818182	0.615385	0.731988	0.64142
5380	0.878049	0.571429	0.714286	0.5	0.71875	0.755245	0.461538	0.708934	0.61062
5390	0.926829	0.642857	0.428571	0.6875	0.671875	0.769231	0.538462	0.723343	0.628956
5400	0.829268	0.625	0.428571	0.5625	0.765625	0.769231	0.461538	0.717579	0.624497
5410	0.926829	0.642857	0.642857	0.375	0.734375	0.72028	0.538462	0.708934	0.612876
5420	0.853659	0.625	0.5	0.4375	0.734375	0.818182	0.461538	0.731988	0.639017
5430	0.853659	0.625	0.571429	0.625	0.71875	0.804196	0.461538	0.73487	0.643193
5440	0.902439	0.553571	0.714286	0.6875	0.75	0.762238	0.769231	0.737752	0.65046
5450	0.878049	0.660714	0.571429	0.5625	0.75	0.818182	0.461538	0.752161	0.668256
5460	0.878049	0.535714	0.5	0.6875	0.6875	0.811189	0.538462	0.723343	0.626285
5470	0.902439	0.642857	0.5	0.75	0.765625	0.79021	0.307692	0.743516	0.657007
5480	0.902439	0.660714	0.642857	0.375	0.6875	0.79021	0.615385	0.731988	0.639698
5490	0.878049	0.660714	0.571429	0.25	0.703125	0.797203	0.461538	0.720461	0.625146
5500	0.95122	0.678571	0.714286	0.75	0.71875	0.755245	0.461538	0.746398	0.661171
5510	0.878049	0.660714	0.5	0.6875	0.6875	0.818182	0.615385	0.74928	0.664011
5520	0.95122	0.571429	0.357143	0.5	0.6875	0.769231	0.384615	0.700288	0.59504
5530	0.853659	0.678571	0.571429	0.5625	0.671875	0.811189	0.615385	0.740634	0.650977
5540	0.95122	0.607143	0.642857	0.5	0.734375	0.776224	0.461538	0.731988	0.641193
5550	0.902439	0.714286	0.5	0.625	0.765625	0.706294	0.615385	0.726225	0.640667
5560	0.902439	0.660714	0.642857	0.375	0.6875	0.797203	0.538462	0.731988	0.639741
5570	0.95122	0.678571	0.5	0.625	0.703125	0.769231	0.692308	0.743516	0.655133
5580	0.804878	0.625	0.714286	0.75	0.78125	0.797203	0.615385	0.755043	0.675584
5590	0.902439	0.660714	0.571429	0.5	0.703125	0.769231	0.538462	0.726225	0.632633
5600	0.926829	0.660714	0.5	0.5625	0.671875	0.741259	0.769231	0.720461	0.626844
5610	0.878049	0.607143	0.5	0.625	0.828125	0.846154	0.615385	0.775216	0.697921
5620	0.902439	0.732143	0.428571	0.5625	0.75	0.804196	0.461538	0.755043	0.67419
5630	0.902439	0.607143	0.642857	0.6875	0.75	0.776224	0.538462	0.740634	0.653741
5640	0.878049	0.696429	0.5	0.4375	0.734375	0.748252	0.615385	0.723343	0.631995
5650	0.829268	0.714286	0.642857	0.8125	0.703125	0.762238	0.384615	0.73487	0.64644
5660	0.853659	0.660714	0.571429	0.5625	0.65625	0.804196	0.692308	0.73487	0.64238
5670	0.853659	0.660714	0.571429	0.5625	0.640625	0.846154	0.461538	0.740634	0.651208
5680	0.878049	0.678571	0.5	0.5625	0.765625	0.839161	0.615385	0.769452	0.690472
5690	0.878049	0.642857	0.642857	0.6875	0.6875	0.783217	0.769231	0.743516	0.657834
5700	0.926829	0.75	0.571429	0.375	0.734375	0.783217	0.461538	0.746398	0.660737
5710	0.829268	0.642857	0.571429	0.4375	0.6875	0.741259	0.692308	0.70317	0.602466
5720	0.853659	0.535714	0.642857	0.5	0.734375	0.804196	0.846154	0.73487	0.643689
5730	0.902439	0.642857	0.428571	0.625	0.75	0.783217	0.384615	0.731988	0.641222
5740	0.97561	0.607143	0.428571	0.5625	0.75	0.79021	0.307692	0.731988	0.638095
5750	0.804878	0.625	0.571429	0.5625	0.625	0.706294	0.538462	0.67147	0.563764
5760	0.829268	0.660714	0.357143	0.5	0.71875	0.783217	0.615385	0.720461	0.627822
5770	0.926829	0.589286	0.5	0.75	0.71875	0.776224	0.538462	0.731988	0.641438
5780	0.878049	0.678571	0.5	0.4375	0.703125	0.769231	0.538462	0.720461	0.627569
5790	0.902439	0.678571	0.642857	0.5	0.734375	0.762238	0.615385	0.737752	0.652353
5800	0.853659	0.678571	0.571429	0.625	0.75	0.79021	0.461538	0.743516	0.659378
5810	0.878049	0.642857	0.642857	0.375	0.734375	0.797203	0.615385	0.737752	0.64759
5820	0.878049	0.714286	0.357143	0.5	0.75	0.804196	0.615385	0.74928	0.665223
5830	0.95122	0.571429	0.357143	0.5	0.78125	0.811189	0.538462	0.740634	0.649874
5840	0.926829	0.553571	0.714286	0.6875	0.765625	0.818182	0.461538	0.755043	0.669877
5850	0.95122	0.696429	0.571429	0.625	0.640625	0.769231	0.461538	0.729107	0.636642
5860	0.926829	0.642857	0.357143	0.5	0.796875	0.811189	0.538462	0.752161	0.666362
5870	0.878049	0.732143	0.428571	0.6875	0.703125	0.776224	0.615385	0.743516	0.657981
5880	0.878049	0.589286	0.571429	0.5625	0.703125	0.783217	0.461538	0.717579	0.619996
5890	0.829268	0.678571	0.714286	0.625	0.703125	0.748252	0.461538	0.720461	0.629084
5900	0.853659	0.732143	0.571429	0.5625	0.703125	0.769231	0.769231	0.743516	0.658888
5910	0.878049	0.589286	0.642857	0.625	0.640625	0.769231	0.615385	0.711816	0.612554
5920	0.902439	0.607143	0.714286	0.6875	0.765625	0.783217	0.615385	0.752161	0.66701
5930	0.804878	0.625	0.428571	0.625	0.734375	0.839161	0.692308	0.74928	0.662272
5940	0.878049	0.625	0.642857	0.5625	0.671875	0.769231	0.692308	0.723343	0.630562
5950	0.95122	0.553571	0.5	0.6875	0.78125	0.748252	0.615385	0.729107	0.636563
5960	0.878049	0.571429	0.571429	0.5	0.78125	0.783217	0.615385	0.731988	0.640506
5970	0.926829	0.571429	0.5	0.75	0.6875	0.762238	0.615385	0.720461	0.62595
5980	0.878049	0.625	0.571429	0.375	0.625	0.741259	0.615385	0.688761	0.584632
5990	0.853659	0.589286	0.5	0.625	0.703125	0.776224	0.461538	0.711816	0.612717
6000	0.878049	0.732143	0.428571	0.625	0.71875	0.79021	0.538462	0.746398	0.660636
6010	0.878049	0.696429	0.714286	0.75	0.8125	0.797203	0.461538	0.775216	0.700564
6020	0.95122	0.714286	0.785714	0.5	0.734375	0.79021	0.384615	0.757925	0.675981
6030	0.878049	0.678571	0.571429	0.625	0.734375	0.755245	0.538462	0.731988	0.643405
6040	0.853659	0.660714	0.571429	0.5625	0.6875	0.734266	0.538462	0.706052	0.609982
6050	0.902439	0.642857	0.571429	0.5	0.734375	0.804196	0.615385	0.746398	0.661514
6060	0.902439	0.642857	0.714286	0.625	0.703125	0.769231	0.461538	0.731988	0.641435
6070	0.902439	0.660714	0.642857	0.625	0.78125	0.776224	0.538462	0.752161	0.669753
6080	0.853659	0.625	0.785714	0.6875	0.75	0.755245	0.615385	0.737752	0.653523
6090	0.804878	0.714286	0.642857	0.5625	0.71875	0.734266	0.615385	0.720461	0.629278
6100	0.878049	0.660714	0.5	0.5625	0.8125	0.72028	0.615385	0.726225	0.638546
6110	0.804878	0.589286	0.571429	0.625	0.671875	0.727273	0.615385	0.688761	0.585125
6120	0.95122	0.714286	0.642857	0.5625	0.6875	0.734266	0.615385	0.731988	0.643694
6130	0.804878	0.589286	0.714286	0.5625	0.71875	0.727273	0.692308	0.70317	0.604387
6140	0.95122	0.589286	0.642857	0.375	0.75	0.797203	0.615385	0.740634	0.650622
6150	0.829268	0.589286	0.5	0.4375	0.828125	0.79021	0.692308	0.737752	0.647216
6160	0.926829	0.660714	0.571429	0.5	0.765625	0.762238	0.461538	0.73487	0.646902
6170	0.853659	0.607143	0.5	0.625	0.75	0.748252	0.538462	0.714697	0.616806
6180	0.878049	0.714286	0.571429	0.5	0.796875	0.79021	0.538462	0.757925	0.675492
6190	0.878049	0.607143	0.714286	0.5	0.71875	0.769231	0.538462	0.723343	0.628415
6200	0.926829	0.642857	0.428571	0.5625	0.703125	0.734266	0.538462	0.708934	0.612181
6210	0.926829	0.589286	0.5	0.625	0.625	0.776224	0.538462	0.708934	0.606931
6220	0.829268	0.642857	0.5	0.625	0.734375	0.804196	0.384615	0.731988	0.639518
6230	0.95122	0.696429	0.642857	0.625	0.640625	0.762238	0.461538	0.729107	0.638476
6240	0.902439	0.625	0.5	0.5	0.734375	0.741259	0.615385	0.714697	0.61945
6250	0.926829	0.678571	0.785714	0.375	0.671875	0.811189	0.538462	0.746398	0.659845
6260	0.902439	0.696429	0.714286	0.4375	0.6875	0.811189	0.538462	0.74928	0.662682
6270	0.878049	0.767857	0.5	0.5	0.640625	0.825175	0.538462	0.74928	0.663799
6280	0.926829	0.625	0.571429	0.6875	0.734375	0.811189	0.692308	0.760807	0.67883
6290	0.926829	0.625	0.5	0.5625	0.78125	0.797203	0.538462	0.74928	0.662564
6300	0.902439	0.678571	0.714286	0.75	0.65625	0.769231	0.461538	0.73487	0.644722
6310	0.902439	0.660714	0.642857	0.625	0.765625	0.783217	0.538462	0.752161	0.669384
6320	0.853659	0.5	0.571429	0.625	0.8125	0.86014	0.615385	0.760807	0.676888
6330	0.926829	0.535714	0.714286	0.5625	0.765625	0.776224	0.307692	0.723343	0.625404
6340	0.878049	0.589286	0.571429	0.5625	0.734375	0.797203	0.692308	0.737752	0.648483
6350	0.902439	0.607143	0.642857	0.5	0.6875	0.748252	0.461538	0.706052	0.606711
6360	0.878049	0.75	0.571429	0.5625	0.796875	0.79021	0.461538	0.763689	0.685164
6370	0.878049	0.589286	0.642857	0.625	0.84375	0.776224	0.769231	0.757925	0.676852
6380	0.878049	0.607143	0.642857	0.5625	0.625	0.748252	0.538462	0.697406	0.594157
6390	0.853659	0.732143	0.5	0.1875	0.75	0.783217	0.692308	0.73487	0.64433
6400	0.878049	0.571429	0.714286	0.75	0.765625	0.832168	0.461538	0.760807	0.679263
6410	0.853659	0.642857	0.571429	0.5625	0.59375	0.755245	0.461538	0.691643	0.586354
6420	0.878049	0.571429	0.571429	0.5	0.734375	0.832168	0.615385	0.743516	0.653826
6430	0.853659	0.571429	0.5	0.6875	0.765625	0.832168	0.384615	0.743516	0.653151
6440	0.926829	0.660714	0.357143	0.5	0.71875	0.762238	0.615385	0.723343	0.630026
6450	0.926829	0.642857	0.428571	0.4375	0.703125	0.804196	0.538462	0.731988	0.637204
6460	0.95122	0.696429	0.5	0.4375	0.71875	0.769231	0.538462	0.73487	0.645941
6470	0.853659	0.625	0.857143	0.5625	0.65625	0.769231	0.615385	0.723343	0.63067
6480	0.926829	0.571429	0.571429	0.625	0.71875	0.769231	0.384615	0.717579	0.622981
6490	0.804878	0.553571	0.428571	0.4375	0.734375	0.762238	0.384615	0.685879	0.57967
6500	0.878049	0.678571	0.428571	0.5625	0.6875	0.804196	0.769231	0.743516	0.654507
6510	0.829268	0.732143	0.214286	0.625	0.75	0.776224	0.461538	0.729107	0.639359
6520	0.878049	0.625	0.428571	0.625	0.75	0.797203	0.615385	0.740634	0.651736
6530	0.902439	0.625	0.428571	0.375	0.75	0.804196	0.461538	0.729107	0.632418
6540	0.853659	0.517857	0.214286	0.5625	0.671875	0.825175	0.461538	0.700288	0.595306
6550	0.95122	0.553571	0.642857	0.625	0.71875	0.832168	0.461538	0.74928	0.660898
6560	0.878049	0.732143	0.714286	0.625	0.6875	0.741259	0.615385	0.73487	0.648776
6570	0.902439	0.75	0.357143	0.5625	0.78125	0.783217	0.538462	0.755043	0.672871
6580	0.804878	0.660714	0.5	0.375	0.765625	0.797203	0.692308	0.73487	0.645071
6590	0.902439	0.625	0.428571	0.4375	0.71875	0.804196	0.461538	0.726225	0.629795
6600	0.829268	0.642857	0.357143	0.625	0.671875	0.692308	0.615385	0.677233	0.573476
6610	0.902439	0.571429	0.428571	0.625	0.734375	0.853147	0.538462	0.752161	0.664478
6620	0.804878	0.714286	0.428571	0.75	0.703125	0.797203	0.538462	0.740634	0.653337
6630	0.853659	0.642857	0.714286	0.625	0.609375	0.797203	0.461538	0.720461	0.626437
6640	0.878049	0.607143	0.357143	0.4375	0.75	0.748252	0.461538	0.700288	0.596403
6650	0.902439	0.571429	0.5	0.625	0.671875	0.783217	0.538462	0.714697	0.615075
6660	0.902439	0.607143	0.5	0.4375	0.625	0.762238	0.615385	0.697406	0.59175
6670	0.829268	0.589286	0.714286	0.625	0.734375	0.825175	0.615385	0.74928	0.66213
6680	0.902439	0.607143	0.428571	0.4375	0.6875	0.713287	0.538462	0.682997	0.578662
6690	0.902439	0.607143	0.642857	0.625	0.671875	0.804196	0.615385	0.737752	0.64642
6700	0.804878	0.553571	0.5	0.625	0.671875	0.762238	0.692308	0.697406	0.594717
6710	0.829268	0.714286	0.5	0.625	0.734375	0.783217	0.692308	0.746398	0.661421
6720	0.853659	0.732143	0.571429	0.625	0.796875	0.734266	0.692308	0.746398	0.665518
6730	0.853659	0.714286	0.428571	0.5	0.65625	0.811189	0.307692	0.723343	0.626642
6740	0.902439	0.714286	0.714286	0.625	0.703125	0.762238	0.461538	0.740634	0.65444
6750	0.926829	0.589286	0.571429	0.5625	0.6875	0.748252	0.538462	0.708934	0.610703
6760	0.829268	0.553571	0.357143	0.5	0.6875	0.727273	0.538462	0.67147	0.559698
6770	0.902439	0.642857	0.714286	0.5	0.71875	0.79021	0.538462	0.740634	0.6515
6780	0.902439	0.714286	0.642857	0.75	0.796875	0.776224	0.769231	0.778098	0.705464
6790	0.829268	0.589286	0.5	0.6875	0.71875	0.783217	0.384615	0.714697	0.615761
6800	0.853659	0.589286	0.642857	0.375	0.640625	0.755245	0.692308	0.694524	0.593684
6810	0.878049	0.571429	0.5	0.75	0.734375	0.762238	0.769231	0.729107	0.637561
6820	0.878049	0.678571	0.5	0.5	0.78125	0.811189	0.692308	0.760807	0.680322
6830	0.878049	0.571429	0.714286	0.5	0.796875	0.699301	0.692308	0.708934	0.615869
6840	0.902439	0.535714	0.571429	0.625	0.734375	0.811189	0.615385	0.737752	0.645647
6850	0.902439	0.607143	0.571429	0.375	0.671875	0.839161	0.384615	0.729107	0.636069
6860	0.853659	0.696429	0.714286	0.4375	0.671875	0.776224	0.615385	0.729107	0.636321
6870	0.878049	0.678571	0.5	0.5	0.6875	0.748252	0.538462	0.711816	0.615622
6880	0.902439	0.5	0.571429	0.375	0.6875	0.776224	0.461538	0.691643	0.583262
6890	0.829268	0.535714	0.642857	0.5	0.71875	0.748252	0.461538	0.691643	0.587276
6900	0.902439	0.642857	0.428571	0.375	0.78125	0.797203	0.461538	0.73487	0.64383
6910	0.902439	0.732143	0.428571	0.4375	0.734375	0.755245	0.538462	0.729107	0.639232
6920	0.829268	0.660714	0.571429	0.5	0.78125	0.804196	0.538462	0.746398	0.66193
6930	0.829268	0.678571	0.428571	0.6875	0.71875	0.797203	0.692308	0.743516	0.657275
6940	0.878049	0.732143	0.642857	0.5	0.640625	0.776224	0.769231	0.737752	0.650848
6950	0.926829	0.517857	0.571429	0.625	0.71875	0.762238	0.384615	0.706052	0.603479
6960	0.878049	0.696429	0.785714	0.5625	0.734375	0.755245	0.307692	0.731988	0.645186
6970	0.926829	0.696429	0.714286	0.6875	0.65625	0.776224	0.615385	0.746398	0.662339
6980	0.853659	0.660714	0.5	0.5625	0.65625	0.762238	0.615385	0.711816	0.613293
6990	0.853659	0.660714	0.428571	0.375	0.640625	0.79021	0.615385	0.708934	0.608125
7000	0.853659	0.642857	0.5	0.75	0.828125	0.783217	0.538462	0.755043	0.675132
7010	0.926829	0.714286	0.428571	0.625	0.78125	0.762238	0.384615	0.743516	0.658424
7020	0.926829	0.607143	0.785714	0.3125	0.671875	0.769231	0.307692	0.706052	0.603115
7030	0.878049	0.678571	0.785714	0.6875	0.75	0.797203	0.461538	0.760807	0.680559
7040	0.902439	0.625	0.571429	0.5	0.71875	0.748252	0.769231	0.723343	0.634356
7050	0.95122	0.642857	0.571429	0.375	0.71875	0.72028	0.384615	0.700288	0.599311
7060	0.804878	0.660714	0.5	0.5625	0.671875	0.741259	0.461538	0.694524	0.592674
7070	0.804878	0.589286	0.428571	0.5625	0.78125	0.797203	0.538462	0.726225	0.631995
7080	0.926829	0.660714	0.428571	0.6875	0.671875	0.811189	0.461538	0.740634	0.652476
7090	0.878049	0.589286	0.714286	0.875	0.71875	0.762238	0.538462	0.73487	0.647648
7100	0.853659	0.767857	0.428571	0.625	0.703125	0.769231	0.538462	0.737752	0.6507
7110	0.853659	0.642857	0.5	0.375	0.703125	0.825175	0.461538	0.729107	0.634645
7120	0.804878	0.571429	0.571429	0.5625	0.78125	0.762238	0.615385	0.717579	0.621503
7130	0.829268	0.589286	0.428571	0.6875	0.671875	0.79021	0.538462	0.711816	0.613688
7140	0.829268	0.553571	0.714286	0.4375	0.796875	0.769231	0.461538	0.717579	0.621424
7150	0.902439	0.607143	0.571429	0.5	0.734375	0.79021	0.384615	0.726225	0.631352
7160	0.878049	0.589286	0.571429	0.375	0.796875	0.804196	0.461538	0.73487	0.641966
7170	0.926829	0.678571	0.642857	0.6875	0.765625	0.734266	0.461538	0.737752	0.652083
7180	0.853659	0.625	0.642857	0.4375	0.703125	0.818182	0.538462	0.73487	0.64373
7190	0.926829	0.607143	0.642857	0.5	0.671875	0.741259	0.615385	0.708934	0.610029
7200	0.902439	0.642857	0.5	0.5625	0.734375	0.755245	0.307692	0.714697	0.616738
7210	0.853659	0.714286	0.428571	0.4375	0.734375	0.825175	0.692308	0.755043	0.670697
7220	0.829268	0.642857	0.642857	0.625	0.734375	0.825175	0.615385	0.755043	0.671979
7230	0.804878	0.660714	0.571429	0.5625	0.78125	0.825175	0.538462	0.755043	0.670545
7240	0.902439	0.714286	0.5	0.5625	0.765625	0.804196	0.769231	0.769452	0.692567
7250	0.829268	0.553571	0.714286	0.5	0.71875	0.762238	0.615385	0.708934	0.608336
7260	0.902439	0.642857	0.714286	0.625	0.703125	0.776224	0.692308	0.743516	0.657691
7270	0.902439	0.517857	0.5	0.5	0.703125	0.678322	0.461538	0.659942	0.547131
7280	0.878049	0.625	0.428571	0.6875	0.71875	0.755245	0.846154	0.729107	0.642598
7290	0.926829	0.642857	0.571429	0.5625	0.734375	0.776224	0.615385	0.740634	0.655605
7300	0.853659	0.696429	0.357143	0.4375	0.6875	0.853147	0.461538	0.743516	0.653664
7310	0.902439	0.642857	0.642857	0.625	0.734375	0.818182	0.461538	0.755043	0.670206
7320	0.878049	0.625	0.5	0.4375	0.71875	0.804196	0.538462	0.729107	0.635208
7330	0.780488	0.625	0.428571	0.625	0.734375	0.783217	0.384615	0.711816	0.615517
7340	0.902439	0.625	0.642857	0.5625	0.625	0.769231	0.769231	0.720461	0.626051
7350	0.853659	0.660714	0.5	0.5625	0.75	0.832168	0.461538	0.752161	0.666907
7360	0.853659	0.625	0.5	0.4375	0.6875	0.762238	0.461538	0.700288	0.597172
7370	0.853659	0.607143	0.428571	0.4375	0.640625	0.804196	0.538462	0.706052	0.602716
7380	0.878049	0.607143	0.357143	0.4375	0.703125	0.839161	0.461538	0.729107	0.632863
7390	0.853659	0.642857	0.5	0.1875	0.609375	0.825175	0.538462	0.706052	0.600607
7400	0.926829	0.660714	0.571429	0.8125	0.703125	0.727273	0.769231	0.73487	0.64755
7410	0.926829	0.660714	0.428571	0.3125	0.6875	0.748252	0.538462	0.70317	0.60116
7420	0.902439	0.535714	0.571429	0.625	0.734375	0.769231	0.692308	0.723343	0.627627
7430	0.853659	0.625	0.642857	0.5625	0.78125	0.769231	0.692308	0.740634	0.654641
7440	0.829268	0.660714	0.428571	0.5625	0.75	0.825175	0.769231	0.755043	0.671822
7450	0.902439	0.660714	0.428571	0.625	0.796875	0.783217	0.384615	0.743516	0.655965
7460	0.853659	0.607143	0.571429	0.3125	0.6875	0.804196	0.461538	0.711816	0.610468
7470	0.878049	0.75	0.428571	0.5625	0.671875	0.748252	0.769231	0.729107	0.641173
7480	0.829268	0.732143	0.571429	0.6875	0.734375	0.804196	0.538462	0.757925	0.675524
7490	0.926829	0.660714	0.571429	0.75	0.765625	0.769231	0.461538	0.74928	0.664819
7500	0.804878	0.678571	0.5	0.5	0.671875	0.783217	0.538462	0.714697	0.616033
7510	0.878049	0.696429	0.428571	0.6875	0.765625	0.79021	0.615385	0.755043	0.674637
7520	0.853659	0.607143	0.571429	0.5	0.765625	0.804196	0.538462	0.737752	0.647648
7530	0.902439	0.589286	0.642857	0.625	0.671875	0.769231	0.615385	0.720461	0.628059
7540	0.926829	0.642857	0.428571	0.5625	0.78125	0.804196	0.615385	0.755043	0.670382
7550	0.902439	0.660714	0.357143	0.5625	0.671875	0.769231	0.538462	0.714697	0.617433
7560	0.853659	0.678571	0.5	0.5	0.8125	0.804196	0.615385	0.757925	0.67541
7570	0.829268	0.625	0.5	0.625	0.71875	0.769231	0.538462	0.717579	0.621234
7580	0.926829	0.642857	0.642857	0.625	0.6875	0.783217	0.538462	0.737752	0.647449
7590	0.878049	0.642857	0.642857	0.4375	0.6875	0.734266	0.384615	0.697406	0.596494
7600	0.878049	0.678571	0.285714	0.5	0.703125	0.769231	0.307692	0.706052	0.606969
7610	0.878049	0.642857	0.214286	0.375	0.71875	0.797203	0.384615	0.708934	0.607744
7620	0.926829	0.607143	0.5	0.6875	0.796875	0.811189	0.538462	0.760807	0.679387
7630	0.878049	0.625	0.642857	0.625	0.75	0.727273	0.692308	0.723343	0.631436
7640	0.902439	0.642857	0.642857	0.6875	0.765625	0.811189	0.692308	0.769452	0.69111
7650	0.95122	0.589286	0.714286	0.5625	0.65625	0.769231	0.461538	0.717579	0.620594
7660	0.853659	0.678571	0.642857	0.625	0.75	0.776224	0.538462	0.743516	0.659246
7670	0.878049	0.642857	0.428571	0.625	0.78125	0.762238	0.615385	0.73487	0.645591
7680	0.829268	0.589286	0.571429	0.5625	0.59375	0.748252	0.384615	0.674352	0.562241
7690	0.878049	0.607143	0.5	0.5625	0.625	0.811189	0.538462	0.717579	0.618331
7700	0.878049	0.732143	0.714286	0.4375	0.734375	0.797203	0.769231	0.763689	0.684321
7710	0.878049	0.625	0.571429	0.6875	0.703125	0.79021	0.538462	0.73487	0.645149
7720	0.853659	0.553571	0.571429	0.75	0.65625	0.748252	0.538462	0.697406	0.593598
7730	0.878049	0.660714	0.428571	0.625	0.6875	0.797203	0.615385	0.73487	0.644
7740	0.902439	0.625	0.357143	0.5625	0.703125	0.727273	0.769231	0.706052	0.608763
7750	0.902439	0.625	0.357143	0.625	0.75	0.79021	0.461538	0.731988	0.641667
7760	0.902439	0.589286	0.571429	0.75	0.75	0.734266	0.538462	0.720461	0.627345
7770	0.902439	0.625	0.785714	0.5625	0.734375	0.832168	0.384615	0.757925	0.674333
7780	0.853659	0.678571	0.571429	0.5	0.75	0.797203	0.384615	0.737752	0.64653
7790	0.902439	0.607143	0.642857	0.375	0.734375	0.797203	0.615385	0.73487	0.641611
7800	0.853659	0.589286	0.714286	0.5	0.703125	0.783217	0.692308	0.726225	0.631144
7810	0.902439	0.553571	0.285714	0.75	0.8125	0.79021	0.769231	0.746398	0.659369
7820	0.829268	0.660714	0.642857	0.5625	0.8125	0.783217	0.692308	0.755043	0.672828
7830	0.97561	0.571429	0.5	0.5625	0.703125	0.804196	0.538462	0.73487	0.642508
7840	0.902439	0.589286	0.428571	0.4375	0.65625	0.804196	0.538462	0.711816	0.613868
7850	0.878049	0.5	0.642857	0.375	0.640625	0.762238	0.615385	0.682997	0.570695
7860	0.95122	0.625	0.357143	0.625	0.671875	0.804196	0.615385	0.73487	0.642782
7870	0.926829	0.625	0.5	0.75	0.671875	0.762238	0.461538	0.720461	0.624958
7880	0.853659	0.625	0.571429	0.5	0.703125	0.762238	0.692308	0.717579	0.624854
7890	0.926829	0.571429	0.5	0.625	0.71875	0.804196	0.461538	0.731988	0.639599
7900	0.902439	0.625	0.642857	0.625	0.703125	0.783217	0.538462	0.73487	0.644475
7910	0.902439	0.660714	0.428571	0.6875	0.75	0.818182	0.615385	0.760807	0.677774
7920	0.95122	0.571429	0.785714	0.5625	0.734375	0.769231	0.538462	0.73487	0.644175
7930	0.902439	0.642857	0.428571	0.5625	0.703125	0.762238	0.307692	0.708934	0.610884
7940	0.95122	0.607143	0.428571	0.5625	0.6875	0.748252	0.615385	0.711816	0.610862
7950	0.829268	0.642857	0.5	0.5	0.8125	0.748252	0.538462	0.723343	0.632706
7960	0.804878	0.589286	0.571429	0.625	0.703125	0.818182	0.384615	0.723343	0.628439
7970	0.878049	0.696429	0.642857	0.6875	0.703125	0.825175	0.230769	0.752161	0.667997
7980	0.829268	0.660714	0.571429	0.8125	0.765625	0.783217	0.461538	0.746398	0.662693
7990	0.878049	0.696429	0.571429	0.6875	0.71875	0.79021	0.538462	0.74928	0.663664
8000	0.902439	0.678571	0.428571	0.4375	0.765625	0.776224	0.384615	0.729107	0.637399
8010	0.926829	0.589286	0.571429	0.375	0.796875	0.825175	0.384615	0.746398	0.658609
8020	0.853659	0.696429	0.571429	0.8125	0.75	0.741259	0.769231	0.746398	0.664353
8030	0.902439	0.553571	0.571429	0.5	0.71875	0.769231	0.615385	0.714697	0.61748
8040	0.829268	0.678571	0.5	0.6875	0.734375	0.734266	0.461538	0.714697	0.620529
8050	0.829268	0.625	0.5	0.5	0.75	0.741259	0.769231	0.714697	0.621186
8060	0.902439	0.571429	0.5	0.5	0.75	0.825175	0.692308	0.746398	0.657575
8070	0.902439	0.625	0.714286	0.75	0.8125	0.811189	0.615385	0.778098	0.701898
8080	0.829268	0.535714	0.571429	0.4375	0.75	0.755245	0.538462	0.697406	0.592382
8090	0.902439	0.75	0.428571	0.6875	0.75	0.776224	0.538462	0.755043	0.673447
8100	0.878049	0.642857	0.642857	0.5	0.6875	0.818182	0.461538	0.737752	0.647116
8110	0.853659	0.607143	0.5	0.5	0.671875	0.783217	0.384615	0.70317	0.602209
8120	0.829268	0.678571	0.714286	0.5625	0.703125	0.811189	0.307692	0.737752	0.64784
8130	0.829268	0.642857	0.428571	0.6875	0.65625	0.734266	0.538462	0.694524	0.592772
8140	0.804878	0.660714	0.285714	0.4375	0.734375	0.748252	0.384615	0.691643	0.591083
8150	0.902439	0.553571	0.5	0.5	0.84375	0.783217	0.461538	0.73487	0.644636
8160	0.853659	0.607143	0.5	0.5	0.625	0.769231	0.461538	0.691643	0.585901
8170	0.853659	0.696429	0.5	0.5625	0.765625	0.79021	0.615385	0.74928	0.665911
8180	0.878049	0.607143	0.428571	0.5625	0.75	0.755245	0.615385	0.717579	0.621948
8190	0.902439	0.642857	0.428571	0.625	0.734375	0.755245	0.615385	0.726225	0.637252
8200	0.902439	0.589286	0.642857	0.5	0.703125	0.804196	0.307692	0.723343	0.625327
8210	0.878049	0.732143	0.571429	0.625	0.671875	0.818182	0.538462	0.755043	0.672537
8220	0.926829	0.607143	0.5	0.4375	0.75	0.755245	0.615385	0.720461	0.627234
8230	0.853659	0.660714	0.642857	0.5625	0.71875	0.727273	0.384615	0.706052	0.609452
8240	0.95122	0.535714	0.642857	0.5	0.78125	0.776224	0.615385	0.73487	0.641956
8250	0.95122	0.642857	0.428571	0.6875	0.734375	0.762238	0.538462	0.73487	0.647086
8260	0.804878	0.625	0.714286	0.4375	0.703125	0.748252	0.384615	0.697406	0.594822
8270	0.878049	0.625	0.357143	0.4375	0.734375	0.783217	0.769231	0.726225	0.631488
8280	0.853659	0.660714	0.428571	0.625	0.765625	0.839161	0.461538	0.757925	0.673547
8290	0.853659	0.589286	0.428571	0.3125	0.6875	0.783217	0.461538	0.694524	0.589015
8300	0.902439	0.535714	0.571429	0.6875	0.6875	0.755245	0.461538	0.70317	0.602623
8310	0.878049	0.642857	0.571429	0.375	0.65625	0.692308	0.461538	0.67147	0.561056
8320	0.853659	0.607143	0.571429	0.5625	0.703125	0.755245	0.769231	0.717579	0.622206
8330	0.902439	0.696429	0.5	0.4375	0.75	0.811189	0.769231	0.760807	0.678677
8340	0.878049	0.464286	0.642857	0.3125	0.71875	0.734266	0.384615	0.668588	0.553893
8350	0.902439	0.714286	0.571429	0.5	0.65625	0.776224	0.384615	0.723343	0.628566
8360	0.853659	0.571429	0.5	0.6875	0.734375	0.818182	0.384615	0.731988	0.638313
8370	0.902439	0.607143	0.571429	0.375	0.734375	0.748252	0.615385	0.711816	0.613664
8380	0.878049	0.517857	0.5	0.4375	0.796875	0.783217	0.692308	0.723343	0.628453
8390	0.902439	0.642857	0.642857	0.5625	0.71875	0.797203	0.461538	0.740634	0.65071
8400	0.853659	0.678571	0.5	0.6875	0.765625	0.79021	0.538462	0.74928	0.664731
8410	0.878049	0.571429	0.5	0.3125	0.65625	0.741259	0.461538	0.674352	0.563874
8420	0.926829	0.625	0.642857	0.5	0.6875	0.769231	0.461538	0.720461	0.623907
8430	0.926829	0.660714	0.571429	0.5625	0.734375	0.727273	0.461538	0.717579	0.623692
8440	0.902439	0.660714	0.571429	0.4375	0.65625	0.79021	0.461538	0.720461	0.624162
8450	0.902439	0.696429	0.642857	0.3125	0.734375	0.748252	0.615385	0.726225	0.636927
8460	0.804878	0.5	0.642857	0.625	0.65625	0.818182	0.538462	0.708934	0.60691
8470	0.902439	0.696429	0.642857	0.5625	0.75	0.797203	0.538462	0.757925	0.676314
8480	0.853659	0.678571	0.785714	0.5625	0.671875	0.776224	0.615385	0.73487	0.645847
8490	0.878049	0.696429	0.428571	0.6875	0.71875	0.72028	0.538462	0.714697	0.621115
8500	0.853659	0.607143	0.5	0.5	0.734375	0.776224	0.692308	0.723343	0.631188
8510	0.780488	0.75	0.357143	0.6875	0.6875	0.727273	0.384615	0.700288	0.607786
8520	0.829268	0.535714	0.714286	0.5	0.703125	0.804196	0.461538	0.714697	0.613999
8530	0.926829	0.571429	0.714286	0.6875	0.75	0.79021	0.461538	0.743516	0.6563
8540	0.926829	0.571429	0.5	0.1875	0.6875	0.783217	0.384615	0.694524	0.591392
8550	0.829268	0.589286	0.642857	0.5625	0.671875	0.797203	0.461538	0.714697	0.617119
8560	0.902439	0.625	0.357143	0.75	0.6875	0.685315	0.692308	0.691643	0.593525
8570	0.878049	0.625	0.642857	0.5	0.765625	0.762238	0.692308	0.73487	0.645269
8580	0.926829	0.535714	0.357143	0.625	0.734375	0.727273	0.461538	0.691643	0.587036
8590	0.756098	0.767857	0.642857	0.625	0.703125	0.818182	0.307692	0.746398	0.660921
8600	0.829268	0.678571	0.571429	0.5625	0.734375	0.72028	0.538462	0.708934	0.614285
8610	0.853659	0.714286	0.5	0.5625	0.609375	0.79021	0.538462	0.720461	0.62812
8620	0.902439	0.732143	0.642857	0.6875	0.796875	0.748252	0.461538	0.755043	0.675417
8630	0.902439	0.607143	0.5	0.4375	0.765625	0.797203	0.615385	0.737752	0.647143
8640	0.878049	0.535714	0.357143	0.625	0.75	0.804196	0.461538	0.720461	0.623484
8650	0.878049	0.607143	0.428571	0.375	0.765625	0.769231	0.538462	0.714697	0.615999
8660	0.902439	0.660714	0.642857	0.4375	0.75	0.811189	0.769231	0.760807	0.677557
8670	0.829268	0.535714	0.571429	0.5625	0.6875	0.769231	0.538462	0.697406	0.592597
8680	0.926829	0.642857	0.428571	0.4375	0.75	0.79021	0.615385	0.737752	0.647037
8690	0.878049	0.589286	0.5	0.4375	0.65625	0.769231	0.461538	0.694524	0.589459
8700	0.902439	0.660714	0.428571	0.5	0.625	0.804196	0.538462	0.720461	0.622848
8710	0.853659	0.625	0.571429	0.4375	0.734375	0.825175	0.384615	0.73487	0.642071
8720	0.902439	0.553571	0.714286	0.5	0.796875	0.776224	0.538462	0.73487	0.644682
8730	0.829268	0.714286	0.428571	0.75	0.78125	0.72028	0.461538	0.723343	0.633728
8740	0.95122	0.625	0.571429	0.75	0.796875	0.769231	0.461538	0.752161	0.669097
8750	0.926829	0.607143	0.571429	0.8125	0.71875	0.79021	0.538462	0.746398	0.661427
8760	0.829268	0.607143	0.428571	0.5	0.75	0.776224	0.615385	0.717579	0.621863
8770	0.878049	0.625	0.428571	0.625	0.65625	0.783217	0.461538	0.711816	0.612455
8780	0.878049	0.625	0.357143	0.5625	0.703125	0.769231	0.538462	0.711816	0.614332
8790	0.878049	0.535714	0.571429	0.4375	0.71875	0.755245	0.615385	0.700288	0.599513
8800	0.878049	0.553571	0.642857	0.625	0.765625	0.797203	0.538462	0.737752	0.647302
8810	0.878049	0.553571	0.642857	0.625	0.671875	0.769231	0.615385	0.711816	0.611394
8820	0.780488	0.571429	0.357143	0.625	0.75	0.804196	0.769231	0.726225	0.630195
8830	0.878049	0.642857	0.5	0.5625	0.78125	0.713287	0.692308	0.717579	0.625803
8840	0.902439	0.714286	0.714286	0.4375	0.625	0.783217	0.538462	0.729107	0.638095
8850	0.926829	0.625	0.5	0.75	0.75	0.762238	0.461538	0.73487	0.645398
8860	0.829268	0.589286	0.5	0.3125	0.84375	0.748252	0.615385	0.714697	0.619759
8870	0.878049	0.589286	0.428571	0.4375	0.765625	0.762238	0.615385	0.714697	0.61805
8880	0.780488	0.696429	0.5	0.5625	0.734375	0.783217	0.538462	0.729107	0.638245
8890	0.829268	0.589286	0.428571	0.5	0.6875	0.811189	0.538462	0.714697	0.615879
8900	0.926829	0.607143	0.571429	0.625	0.8125	0.741259	0.615385	0.737752	0.652638
8910	0.878049	0.589286	0.714286	0.5625	0.703125	0.769231	0.461538	0.717579	0.622264
8920	0.902439	0.5	0.5	0.6875	0.75	0.769231	0.538462	0.714697	0.61606
8930	0.853659	0.589286	0.571429	0.5625	0.765625	0.741259	0.384615	0.706052	0.606645
8940	0.878049	0.553571	0.714286	0.6875	0.75	0.699301	0.615385	0.70317	0.603918
8950	0.878049	0.678571	0.571429	0.625	0.734375	0.734266	0.461538	0.720461	0.631001
8960	0.878049	0.625	0.5	0.625	0.71875	0.783217	0.615385	0.731988	0.640549
8970	0.926829	0.607143	0.428571	0.75	0.671875	0.797203	0.615385	0.73487	0.643958
8980	0.902439	0.696429	0.5	0.5625	0.671875	0.832168	0.461538	0.74928	0.660855
8990	0.853659	0.714286	0.571429	0.6875	0.671875	0.825175	0.615385	0.757925	0.675244
9000	0.926829	0.732143	0.571429	0.5625	0.703125	0.811189	0.538462	0.760807	0.678954
9010	0.902439	0.553571	0.428571	0.625	0.6875	0.783217	0.461538	0.708934	0.605409
9020	0.95122	0.589286	0.5	0.5	0.796875	0.685315	0.461538	0.697406	0.597789
9030	0.902439	0.75	0.571429	0.5	0.765625	0.762238	0.615385	0.752161	0.671951
9040	0.878049	0.696429	0.428571	0.6875	0.71875	0.72028	0.615385	0.717579	0.62582
9050	0.829268	0.589286	0.571429	0.375	0.71875	0.797203	0.615385	0.717579	0.61916
9060	0.853659	0.607143	0.428571	0.5	0.734375	0.734266	0.461538	0.694524	0.594355
9070	0.853659	0.607143	0.642857	0.4375	0.78125	0.811189	0.692308	0.74928	0.664227
9080	0.878049	0.535714	0.714286	0.625	0.703125	0.797203	0.538462	0.726225	0.631408
9090	0.829268	0.660714	0.642857	0.75	0.734375	0.748252	0.307692	0.720461	0.626931
9100	0.878049	0.607143	0.714286	0.6875	0.765625	0.776224	0.384615	0.737752	0.648931
9110	0.853659	0.660714	0.571429	0.625	0.65625	0.769231	0.615385	0.720461	0.627847
9120	0.878049	0.642857	0.357143	0.625	0.796875	0.804196	0.538462	0.74928	0.662707
9130	0.902439	0.589286	0.5	0.5625	0.734375	0.72028	0.615385	0.70317	0.604111
9140	0.878049	0.589286	0.357143	0.625	0.703125	0.818182	0.461538	0.726225	0.631707
9150	0.853659	0.571429	0.714286	0.4375	0.6875	0.776224	0.384615	0.70317	0.598251
9160	0.853659	0.625	0.571429	0.625	0.75	0.811189	0.615385	0.74928	0.662311
9170	0.853659	0.589286	0.5	0.5	0.6875	0.783217	0.461538	0.706052	0.603629
9180	0.853659	0.642857	0.571429	0.6875	0.71875	0.79021	0.615385	0.740634	0.653476
9190	0.926829	0.678571	0.571429	0.625	0.78125	0.811189	0.769231	0.778098	0.703147
9200	0.853659	0.5	0.5	0.6875	0.75	0.727273	0.615385	0.694524	0.590857
9210	0.926829	0.660714	0.428571	0.5	0.71875	0.762238	0.538462	0.723343	0.631171
9220	0.829268	0.589286	0.428571	0.625	0.75	0.741259	0.384615	0.697406	0.597315
9230	0.926829	0.660714	0.642857	0.625	0.65625	0.755245	0.538462	0.723343	0.631153
9240	0.95122	0.732143	0.5	0.625	0.6875	0.783217	0.461538	0.746398	0.661547
9250	0.902439	0.571429	0.571429	0.5	0.703125	0.804196	0.461538	0.723343	0.626522
9260	0.902439	0.678571	0.5	0.5625	0.71875	0.825175	0.769231	0.763689	0.68219
9270	0.878049	0.678571	0.571429	0.625	0.78125	0.797203	0.461538	0.755043	0.672137
9280	0.853659	0.714286	0.571429	0.625	0.703125	0.783217	0.615385	0.743516	0.657431
9290	0.829268	0.696429	0.428571	0.75	0.671875	0.79021	0.461538	0.729107	0.636727
9300	0.902439	0.660714	0.714286	0.3125	0.765625	0.734266	0.538462	0.720461	0.628756
9310	0.878049	0.589286	0.357143	0.5	0.765625	0.776224	0.692308	0.723343	0.628827
9320	0.902439	0.714286	0.357143	0.6875	0.734375	0.783217	0.538462	0.746398	0.662077
9330	0.853659	0.642857	0.571429	0.625	0.75	0.755245	0.538462	0.726225	0.633418
9340	0.780488	0.678571	0.642857	0.5	0.703125	0.769231	0.692308	0.723343	0.633286
9350	0.878049	0.660714	0.357143	0.5	0.734375	0.804196	0.538462	0.73487	0.643019
9360	0.902439	0.553571	0.571429	0.5	0.6875	0.818182	0.846154	0.737752	0.648502
9370	0.878049	0.660714	0.5	0.75	0.734375	0.783217	0.538462	0.743516	0.659354
9380	0.878049	0.607143	0.642857	0.8125	0.671875	0.776224	0.538462	0.729107	0.63662
9390	0.902439	0.607143	0.571429	0.625	0.703125	0.839161	0.538462	0.752161	0.664495
9400	0.853659	0.678571	0.428571	0.4375	0.703125	0.804196	0.692308	0.73487	0.641766
9410	0.878049	0.714286	0.5	0.5625	0.734375	0.741259	0.384615	0.720461	0.630736
9420	0.926829	0.625	0.5	0.4375	0.6875	0.776224	0.769231	0.726225	0.63088
9430	0.878049	0.607143	0.642857	0.625	0.8125	0.734266	0.692308	0.73487	0.647809
9440	0.804878	0.642857	0.571429	0.5625	0.703125	0.762238	0.615385	0.714697	0.620412
9450	0.853659	0.696429	0.428571	0.5	0.78125	0.797203	0.769231	0.755043	0.673618
9460	0.902439	0.553571	0.571429	0.4375	0.71875	0.79021	0.307692	0.708934	0.605895
9470	0.902439	0.571429	0.642857	0.75	0.671875	0.755245	0.538462	0.714697	0.617596
9480	0.853659	0.5	0.571429	0.5	0.734375	0.839161	0.461538	0.726225	0.627828
9490	0.756098	0.607143	0.5	0.5625	0.734375	0.811189	0.615385	0.726225	0.630811
9500	0.878049	0.660714	0.5	0.6875	0.734375	0.727273	0.538462	0.717579	0.625546
9510	0.780488	0.571429	0.428571	0.5	0.765625	0.762238	0.538462	0.700288	0.597653
9520	0.878049	0.5	0.428571	0.5	0.6875	0.776224	0.538462	0.691643	0.58376
9530	0.853659	0.678571	0.642857	0.6875	0.75	0.755245	0.384615	0.731988	0.645629
9540	0.853659	0.535714	0.571429	0.75	0.75	0.783217	0.692308	0.731988	0.641501
9550	0.97561	0.625	0.5	0.6875	0.640625	0.755245	0.538462	0.717579	0.621783
9560	0.902439	0.678571	0.571429	0.4375	0.765625	0.748252	0.538462	0.729107	0.64031
9570	0.902439	0.589286	0.642857	0.375	0.6875	0.804196	0.615385	0.726225	0.629755
9580	0.902439	0.607143	0.428571	0.6875	0.65625	0.797203	0.307692	0.714697	0.615802
9590	0.902439	0.589286	0.5	0.5625	0.703125	0.762238	0.692308	0.717579	0.621012
9600	0.902439	0.607143	0.714286	0.625	0.703125	0.769231	0.461538	0.726225	0.632937
9610	0.902439	0.607143	0.571429	0.5	0.734375	0.797203	0.615385	0.737752	0.647797
9620	0.926829	0.589286	0.5	0.5	0.75	0.762238	0.461538	0.717579	0.621862
9630	0.878049	0.553571	0.571429	0.375	0.71875	0.762238	0.538462	0.700288	0.59801
9640	0.97561	0.678571	0.642857	0.6875	0.71875	0.741259	0.307692	0.731988	0.645558
9650	0.926829	0.535714	0.5	0.75	0.71875	0.776224	0.384615	0.717579	0.619196
9660	0.853659	0.75	0.428571	0.5625	0.84375	0.797203	0.615385	0.772334	0.696416
9670	0.804878	0.660714	0.5	0.625	0.703125	0.818182	0.923077	0.752161	0.670161
9680	0.926829	0.660714	0.642857	0.1875	0.640625	0.769231	0.538462	0.706052	0.605623
9690	0.878049	0.678571	0.5	0.5	0.671875	0.832168	0.615385	0.746398	0.660083
9700	0.878049	0.5	0.5	0.625	0.65625	0.846154	0.538462	0.723343	0.624928
9710	0.829268	0.571429	0.428571	0.5	0.78125	0.797203	0.615385	0.726225	0.631979
9720	0.853659	0.642857	0.428571	0.625	0.71875	0.776224	0.461538	0.720461	0.625067
9730	0.902439	0.714286	0.428571	0.5625	0.65625	0.832168	0.846154	0.760807	0.679249
9740	0.780488	0.535714	0.357143	0.5625	0.6875	0.797203	0.538462	0.694524	0.58724
9750	0.878049	0.625	0.357143	0.6875	0.609375	0.769231	0.538462	0.700288	0.599504
9760	0.902439	0.571429	0.428571	0.625	0.765625	0.811189	0.384615	0.73487	0.644697
9770	0.902439	0.714286	0.428571	0.5625	0.71875	0.825175	0.615385	0.760807	0.680509
9780	0.902439	0.696429	0.5	0.625	0.703125	0.748252	0.461538	0.723343	0.630438
9790	0.829268	0.464286	0.428571	0.6875	0.75	0.734266	0.692308	0.688761	0.580916
9800	0.926829	0.714286	0.428571	0.625	0.671875	0.783217	0.692308	0.743516	0.657916
9810	0.829268	0.589286	0.5	0.5	0.6875	0.748252	0.384615	0.685879	0.581485
9820	0.829268	0.607143	0.214286	0.5625	0.765625	0.762238	0.461538	0.70317	0.602553
9830	0.95122	0.714286	0.714286	0.625	0.6875	0.734266	0.384615	0.729107	0.640929
9840	0.853659	0.625	0.642857	0.625	0.65625	0.804196	0.692308	0.73487	0.643853
9850	0.926829	0.642857	0.5	0.5625	0.671875	0.762238	0.538462	0.717579	0.623512
9860	0.95122	0.607143	0.5	0.4375	0.65625	0.804196	0.615385	0.726225	0.630203
9870	0.853659	0.642857	0.642857	0.5625	0.640625	0.741259	0.461538	0.697406	0.594419
9880	0.878049	0.625	0.642857	0.625	0.78125	0.79021	0.692308	0.755043	0.672085
9890	0.780488	0.696429	0.642857	0.5	0.734375	0.783217	0.615385	0.73487	0.646509
9900	0.926829	0.642857	0.428571	0.375	0.765625	0.741259	0.615385	0.717579	0.625278
9910	0.902439	0.678571	0.428571	0.4375	0.765625	0.825175	0.692308	0.760807	0.67767
9920	0.926829	0.660714	0.642857	0.5	0.71875	0.776224	0.538462	0.737752	0.648656
9930	0.878049	0.714286	0.285714	0.625	0.75	0.762238	0.307692	0.723343	0.633036
9940	0.804878	0.642857	0.571429	0.75	0.671875	0.762238	0.615385	0.717579	0.624286
9950	0.853659	0.660714	0.571429	0.5625	0.8125	0.818182	0.538462	0.763689	0.682807
9960	0.878049	0.625	0.642857	0.625	0.765625	0.797203	0.538462	0.74928	0.666088
9970	0.902439	0.714286	0.642857	0.5625	0.65625	0.804196	0.461538	0.743516	0.654962
9980	0.804878	0.607143	0.5	0.5625	0.6875	0.797203	0.846154	0.726225	0.63279
9990	0.926829	0.678571	0.5	0.75	0.6875	0.769231	0.769231	0.746398	0.662557
10000	0.926829	0.678571	0.428571	0.5	0.71875	0.706294	0.538462	0.70317	0.608177
10010	0.878049	0.625	0.428571	0.5625	0.78125	0.804196	0.538462	0.743516	0.653904
10020	0.829268	0.678571	0.5	0.375	0.6875	0.776224	0.384615	0.706052	0.606499
10030	0.902439	0.642857	0.714286	0.4375	0.734375	0.706294	0.538462	0.706052	0.612016
10040	0.902439	0.589286	0.5	0.6875	0.703125	0.755245	0.769231	0.723343	0.632593
10050	0.804878	0.589286	0.5	0.625	0.6875	0.79021	0.384615	0.706052	0.60365
10060	0.853659	0.660714	0.428571	0.6875	0.703125	0.769231	0.538462	0.723343	0.629669
10070	0.853659	0.714286	0.642857	0.5625	0.703125	0.762238	0.615385	0.73487	0.644389
10080	0.878049	0.571429	0.5	0.5	0.78125	0.783217	0.615385	0.729107	0.635635
10090	0.829268	0.732143	0.642857	0.5625	0.6875	0.783217	0.538462	0.737752	0.650561
10100	0.853659	0.607143	0.857143	0.5	0.765625	0.706294	0.307692	0.700288	0.602428
10110	0.853659	0.589286	0.714286	0.5	0.796875	0.797203	0.538462	0.743516	0.65659
10120	0.902439	0.535714	0.571429	0.5625	0.734375	0.825175	0.384615	0.731988	0.636753
10130	0.878049	0.589286	0.357143	0.3125	0.703125	0.734266	0.692308	0.685879	0.57621
10140	0.878049	0.607143	0.571429	0.6875	0.765625	0.776224	0.538462	0.737752	0.650142
10150	0.926829	0.696429	0.571429	0.5625	0.671875	0.804196	0.538462	0.746398	0.659495
10160	0.902439	0.535714	0.357143	0.375	0.796875	0.79021	0.230769	0.706052	0.602078
10170	0.829268	0.571429	0.357143	0.6875	0.75	0.797203	0.615385	0.726225	0.630965
10180	0.902439	0.625	0.5	0.6875	0.734375	0.755245	0.538462	0.726225	0.63439
10190	0.829268	0.553571	0.714286	0.75	0.6875	0.776224	0.538462	0.717579	0.623273
10200	0.878049	0.642857	0.428571	0.5625	0.703125	0.783217	0.538462	0.723343	0.629722
10210	0.926829	0.714286	0.571429	0.5625	0.78125	0.762238	0.769231	0.760807	0.683059
10220	0.902439	0.678571	0.5	0.625	0.734375	0.776224	0.615385	0.743516	0.656063
10230	0.902439	0.714286	0.5	0.5625	0.671875	0.762238	0.307692	0.717579	0.623843
10240	0.902439	0.678571	0.571429	0.5	0.640625	0.741259	0.615385	0.708934	0.613443
10250	0.878049	0.678571	0.571429	0.5625	0.671875	0.776224	0.846154	0.737752	0.650245
10260	0.902439	0.642857	0.571429	0.5	0.765625	0.79021	0.846154	0.755043	0.673296
10270	0.829268	0.553571	0.571429	0.6875	0.796875	0.797203	0.538462	0.737752	0.647257
10280	0.780488	0.625	0.785714	0.5	0.671875	0.783217	0.538462	0.714697	0.61751
10290	0.853659	0.607143	0.5	0.5	0.796875	0.783217	0.615385	0.73487	0.644218
10300	0.853659	0.678571	0.642857	0.5625	0.671875	0.79021	0.538462	0.731988	0.642509
10310	0.878049	0.642857	0.642857	0.5	0.765625	0.776224	0.461538	0.73487	0.644104
10320	0.95122	0.660714	0.357143	0.5	0.625	0.776224	0.769231	0.720461	0.624476
10330	0.853659	0.660714	0.285714	0.5625	0.796875	0.762238	0.538462	0.726225	0.634748
10340	0.878049	0.553571	0.428571	0.625	0.734375	0.769231	0.461538	0.708934	0.609006
10350	0.829268	0.660714	0.5	0.5	0.65625	0.748252	0.230769	0.685879	0.580918
10360	0.853659	0.607143	0.428571	0.6875	0.78125	0.734266	0.384615	0.708934	0.609849
10370	0.853659	0.696429	0.428571	0.5	0.78125	0.748252	0.692308	0.731988	0.642661
10380	0.853659	0.5	0.642857	0.4375	0.75	0.755245	0.692308	0.70317	0.602711
10390	0.829268	0.625	0.571429	0.6875	0.65625	0.762238	0.461538	0.706052	0.608023
10400	0.902439	0.714286	0.571429	0.6875	0.75	0.797203	0.615385	0.766571	0.688744
10410	0.878049	0.75	0.5	0.5	0.703125	0.797203	0.615385	0.74928	0.664861
10420	0.878049	0.571429	0.785714	0.5625	0.65625	0.818182	0.615385	0.73487	0.642024
10430	0.926829	0.642857	0.5	0.5	0.625	0.811189	0.615385	0.729107	0.637142
10440	0.926829	0.696429	0.5	0.5625	0.734375	0.839161	0.692308	0.775216	0.697908
10450	0.878049	0.625	0.642857	0.375	0.71875	0.748252	0.384615	0.70317	0.602508
10460	0.853659	0.607143	0.428571	0.6875	0.671875	0.79021	0.615385	0.720461	0.625753
10470	0.853659	0.642857	0.5	0.5625	0.6875	0.755245	0.538462	0.708934	0.612368
10480	0.853659	0.607143	0.571429	0.5625	0.671875	0.783217	0.615385	0.717579	0.620389
10490	0.829268	0.607143	0.642857	0.5	0.734375	0.832168	0.461538	0.740634	0.649607
10500	0.902439	0.571429	0.5	0.5625	0.734375	0.776224	0.538462	0.720461	0.625946
10510	0.829268	0.589286	0.642857	0.625	0.734375	0.804196	0.461538	0.731988	0.640561
10520	0.829268	0.589286	0.642857	0.375	0.71875	0.776224	0.384615	0.70317	0.601123
10530	0.902439	0.642857	0.642857	0.375	0.75	0.79021	0.307692	0.729107	0.636775
10540	0.829268	0.678571	0.357143	0.5625	0.71875	0.776224	0.384615	0.714697	0.616759
10550	0.829268	0.625	0.5	0.4375	0.65625	0.783217	0.538462	0.70317	0.59938
10560	0.853659	0.553571	0.428571	0.5625	0.6875	0.797203	0.384615	0.70317	0.597422
10570	0.902439	0.625	0.571429	0.375	0.6875	0.804196	0.461538	0.723343	0.62682
10580	0.853659	0.642857	0.785714	0.625	0.859375	0.783217	0.692308	0.772334	0.695489
10590	0.926829	0.553571	0.571429	0.5625	0.703125	0.804196	0.461538	0.726225	0.628909
10600	0.926829	0.660714	0.642857	0.4375	0.703125	0.72028	0.538462	0.708934	0.612694
10610	0.804878	0.553571	0.357143	0.5625	0.6875	0.755245	0.384615	0.677233	0.566511
10620	0.853659	0.535714	0.5	0.625	0.65625	0.832168	0.538462	0.720461	0.620808
10630	0.878049	0.660714	0.357143	0.625	0.78125	0.776224	0.384615	0.731988	0.640553
10640	0.853659	0.660714	0.357143	0.4375	0.765625	0.776224	0.538462	0.723343	0.630584
10650	0.878049	0.607143	0.428571	0.625	0.78125	0.741259	0.692308	0.723343	0.632526
10660	0.902439	0.517857	0.571429	0.5625	0.75	0.776224	0.538462	0.717579	0.618948
10670	0.878049	0.678571	0.428571	0.5	0.78125	0.762238	0.615385	0.73487	0.647704
10680	0.829268	0.678571	0.714286	0.375	0.734375	0.762238	0.615385	0.726225	0.632778
10690	0.95122	0.678571	0.571429	0.6875	0.703125	0.72028	0.461538	0.720461	0.629672
10700	0.902439	0.589286	0.5	0.6875	0.765625	0.832168	0.769231	0.766571	0.686723
10710	0.95122	0.607143	0.714286	0.75	0.703125	0.811189	0.384615	0.752161	0.666887
10720	0.878049	0.535714	0.714286	0.5	0.703125	0.678322	0.307692	0.662824	0.553567
10730	0.902439	0.482143	0.642857	0.6875	0.71875	0.846154	0.461538	0.740634	0.649184
10740	0.853659	0.642857	0.714286	0.6875	0.625	0.79021	0.692308	0.731988	0.640275
10750	0.804878	0.678571	0.571429	0.5625	0.703125	0.762238	0.846154	0.729107	0.639002
10760	0.829268	0.607143	0.428571	0.4375	0.75	0.762238	0.384615	0.700288	0.597652
10770	0.804878	0.660714	0.571429	0.4375	0.75	0.776224	0.615385	0.726225	0.63311
10780	0.878049	0.607143	0.571429	0.5625	0.71875	0.755245	0.461538	0.711816	0.614839
10790	0.878049	0.660714	0.714286	0.375	0.6875	0.776224	0.384615	0.717579	0.620183
10800	0.95122	0.535714	0.571429	0.4375	0.671875	0.797203	0.538462	0.714697	0.612722
10810	0.853659	0.642857	0.5	0.625	0.703125	0.755245	0.307692	0.706052	0.605937
10820	0.878049	0.607143	0.642857	0.5	0.734375	0.769231	0.538462	0.723343	0.632551
10830	0.878049	0.571429	0.571429	0.375	0.671875	0.72028	0.461538	0.674352	0.564229
10840	0.853659	0.571429	0.5	0.75	0.703125	0.727273	0.538462	0.697406	0.595909
10850	0.829268	0.553571	0.5	0.5625	0.703125	0.776224	0.538462	0.70317	0.600313
10860	0.878049	0.553571	0.5	0.625	0.765625	0.783217	0.538462	0.726225	0.631773
10870	0.780488	0.642857	0.357143	0.375	0.71875	0.776224	0.538462	0.700288	0.598815
10880	0.878049	0.660714	0.5	0.3125	0.640625	0.678322	0.769231	0.67147	0.563216
10890	0.853659	0.607143	0.5	0.6875	0.734375	0.727273	0.615385	0.708934	0.613582
10900	0.804878	0.696429	0.214286	0.4375	0.78125	0.762238	0.692308	0.720461	0.627992
10910	0.926829	0.642857	0.5	0.625	0.734375	0.783217	0.615385	0.743516	0.655566
10920	0.829268	0.642857	0.428571	0.5	0.78125	0.72028	0.461538	0.700288	0.602534
10930	0.878049	0.625	0.571429	0.5625	0.8125	0.769231	0.615385	0.743516	0.657645
10940	0.804878	0.571429	0.642857	0.375	0.765625	0.79021	0.692308	0.723343	0.628626
10950	0.804878	0.660714	0.785714	0.4375	0.765625	0.755245	0.461538	0.723343	0.632115
10960	0.902439	0.625	0.571429	0.5	0.65625	0.776224	0.538462	0.714697	0.616537
10970	0.829268	0.589286	0.714286	0.625	0.796875	0.748252	0.461538	0.723343	0.628959
10980	0.926829	0.607143	0.642857	0.625	0.796875	0.804196	0.461538	0.757925	0.674876
10990	0.926829	0.642857	0.642857	0.6875	0.8125	0.79021	0.692308	0.772334	0.695438
11000	0.926829	0.571429	0.642857	0.625	0.75	0.783217	0.384615	0.731988	0.640949
11010	0.926829	0.767857	0.5	0.5625	0.71875	0.741259	0.615385	0.740634	0.659824
11020	0.926829	0.732143	0.642857	0.5625	0.6875	0.79021	0.538462	0.752161	0.669129
11030	0.902439	0.660714	0.357143	0.75	0.6875	0.79021	0.692308	0.740634	0.655046
11040	0.853659	0.607143	0.5	0.375	0.734375	0.79021	0.461538	0.714697	0.614737
11050	0.853659	0.678571	0.357143	0.5625	0.75	0.762238	0.692308	0.729107	0.639331
11060	0.878049	0.607143	0.5	0.5	0.8125	0.776224	0.615385	0.737752	0.64894
11070	0.902439	0.625	0.5	0.4375	0.703125	0.776224	0.384615	0.711816	0.611164
11080	0.878049	0.678571	0.642857	0.6875	0.71875	0.762238	0.692308	0.743516	0.658773
11090	0.804878	0.625	0.571429	0.5	0.71875	0.818182	0.384615	0.726225	0.631537
11100	0.878049	0.607143	0.571429	0.5625	0.703125	0.818182	0.615385	0.740634	0.651899
11110	0.756098	0.696429	0.5	0.75	0.71875	0.769231	0.538462	0.726225	0.637241
11120	0.95122	0.660714	0.5	0.4375	0.71875	0.734266	0.538462	0.714697	0.620103
11130	0.804878	0.553571	0.642857	0.5625	0.703125	0.811189	0.461538	0.717579	0.618362
11140	0.804878	0.732143	0.642857	0.625	0.78125	0.797203	0.461538	0.757925	0.677093
11150	0.829268	0.625	0.714286	0.5	0.6875	0.769231	0.615385	0.717579	0.623742
11160	0.853659	0.5	0.571429	0.5625	0.671875	0.811189	0.692308	0.714697	0.615965
11170	0.902439	0.642857	0.714286	0.5625	0.703125	0.727273	0.461538	0.711816	0.615808
11180	0.804878	0.642857	0.571429	0.6875	0.65625	0.839161	0.461538	0.737752	0.645498
11190	0.853659	0.589286	0.642857	0.5625	0.75	0.811189	0.461538	0.737752	0.645
11200	0.878049	0.732143	0.714286	0.75	0.734375	0.797203	0.461538	0.766571	0.688275
11210	0.878049	0.607143	0.714286	0.375	0.65625	0.825175	0.230769	0.717579	0.617369
11220	0.804878	0.589286	0.5	0.5	0.78125	0.79021	0.615385	0.726225	0.63191
11230	0.878049	0.678571	0.571429	0.6875	0.78125	0.797203	0.307692	0.752161	0.668847
11240	0.878049	0.5	0.571429	0.4375	0.703125	0.769231	0.615385	0.697406	0.589464
11250	0.853659	0.625	0.214286	0.5	0.671875	0.818182	0.461538	0.711816	0.6097
11260	0.853659	0.767857	0.571429	0.4375	0.734375	0.797203	0.692308	0.757925	0.677946
11270	0.926829	0.625	0.571429	0.375	0.75	0.762238	0.461538	0.720461	0.626098
11280	0.829268	0.607143	0.428571	0.5	0.8125	0.762238	0.615385	0.723343	0.631281
11290	0.926829	0.607143	0.5	0.4375	0.703125	0.811189	0.846154	0.743516	0.654438
11300	0.878049	0.625	0.642857	0.5625	0.703125	0.79021	0.307692	0.723343	0.627186
11310	0.853659	0.660714	0.5	0.625	0.8125	0.776224	0.538462	0.746398	0.661638
11320	0.878049	0.678571	0.642857	0.625	0.71875	0.748252	0.461538	0.726225	0.637187
11330	0.878049	0.625	0.428571	0.5	0.703125	0.811189	0.384615	0.723343	0.627268
11340	0.878049	0.571429	0.642857	0.6875	0.734375	0.748252	0.615385	0.720461	0.625247
11350	0.878049	0.696429	0.642857	0.5625	0.78125	0.755245	0.538462	0.743516	0.658964
11360	0.853659	0.589286	0.714286	0.5	0.734375	0.811189	0.384615	0.731988	0.636809
11370	0.926829	0.571429	0.642857	0.375	0.71875	0.783217	0.769231	0.729107	0.634719
11380	0.853659	0.714286	0.428571	0.5625	0.78125	0.748252	0.461538	0.729107	0.639636
11390	0.853659	0.660714	0.285714	0.25	0.65625	0.755245	0.615385	0.685879	0.578667
11400	0.95122	0.607143	0.357143	0.4375	0.71875	0.748252	0.692308	0.711816	0.616369
11410	0.878049	0.571429	0.428571	0.6875	0.765625	0.734266	0.538462	0.708934	0.611626
11420	0.853659	0.642857	0.5	0.625	0.703125	0.776224	0.538462	0.723343	0.63216
11430	0.829268	0.589286	0.642857	0.5625	0.765625	0.692308	0.461538	0.688761	0.587816
11440	0.878049	0.553571	0.571429	0.625	0.78125	0.748252	0.461538	0.714697	0.617447
11450	0.853659	0.714286	0.714286	0.625	0.71875	0.79021	0.461538	0.74928	0.664308
11460	0.829268	0.589286	0.571429	0.5	0.671875	0.783217	0.692308	0.711816	0.612114
11470	0.853659	0.660714	0.5	0.375	0.734375	0.811189	0.384615	0.729107	0.635835
11480	0.926829	0.589286	0.571429	0.5625	0.765625	0.818182	0.538462	0.752161	0.666908
11490	0.902439	0.696429	0.428571	0.5625	0.765625	0.783217	0.692308	0.752161	0.669195
11500	0.926829	0.660714	0.571429	0.625	0.71875	0.797203	0.461538	0.746398	0.660196
11510	0.878049	0.5	0.571429	0.4375	0.703125	0.818182	0.615385	0.717579	0.616511
11520	0.878049	0.607143	0.5	0.375	0.703125	0.811189	0.230769	0.711816	0.607646
11530	0.926829	0.660714	0.5	0.5	0.703125	0.762238	0.615385	0.726225	0.63192
11540	0.878049	0.660714	0.5	0.4375	0.71875	0.769231	0.230769	0.708934	0.609597
11550	0.829268	0.571429	0.571429	0.5625	0.6875	0.825175	0.615385	0.729107	0.635189
11560	0.902439	0.607143	0.642857	0.5625	0.71875	0.79021	0.615385	0.737752	0.646816
11570	0.878049	0.642857	0.642857	0.5625	0.71875	0.769231	0.615385	0.731988	0.639516
11580	0.804878	0.571429	0.5	0.5	0.75	0.727273	0.615385	0.691643	0.588435
11590	0.829268	0.535714	0.642857	0.3125	0.75	0.804196	0.384615	0.708934	0.606943
11600	0.926829	0.785714	0.571429	0.5	0.703125	0.741259	0.615385	0.740634	0.654886
11610	0.829268	0.696429	0.5	0.625	0.71875	0.783217	0.538462	0.73487	0.644681
11620	0.878049	0.696429	0.642857	0.6875	0.59375	0.783217	0.461538	0.723343	0.632201
11630	0.878049	0.517857	0.642857	0.5	0.671875	0.783217	0.538462	0.70317	0.597888
11640	0.829268	0.696429	0.642857	0.75	0.796875	0.748252	0.769231	0.755043	0.67707
11650	0.829268	0.607143	0.428571	0.625	0.6875	0.748252	0.692308	0.70317	0.603532
11660	0.829268	0.660714	0.642857	0.625	0.765625	0.72028	0.692308	0.723343	0.635903
11670	0.853659	0.625	0.571429	0.6875	0.6875	0.818182	0.461538	0.737752	0.648042
11680	0.95122	0.625	0.5	0.8125	0.640625	0.797203	0.384615	0.731988	0.640025
11690	0.902439	0.607143	0.571429	0.5	0.765625	0.748252	0.461538	0.717579	0.621459
11700	0.853659	0.714286	0.642857	0.6875	0.765625	0.699301	0.692308	0.729107	0.643577
11710	0.829268	0.625	0.571429	0.4375	0.6875	0.783217	0.461538	0.708934	0.60756
11720	0.853659	0.589286	0.5	0.375	0.734375	0.769231	0.692308	0.711816	0.61374
11730	0.829268	0.642857	0.5	0.75	0.71875	0.79021	0.769231	0.743516	0.657837
11740	0.878049	0.607143	0.5	0.4375	0.734375	0.72028	0.692308	0.700288	0.601171
11750	0.853659	0.696429	0.642857	0.5625	0.640625	0.727273	0.769231	0.711816	0.618614
11760	0.902439	0.660714	0.357143	0.6875	0.75	0.734266	0.538462	0.720461	0.627987
11770	0.902439	0.535714	0.214286	0.6875	0.609375	0.839161	0.692308	0.717579	0.618386
11780	0.853659	0.589286	0.642857	0.5	0.734375	0.783217	0.692308	0.729107	0.635005
11790	0.878049	0.696429	0.428571	0.5	0.703125	0.755245	0.538462	0.717579	0.624349
11800	0.853659	0.625	0.357143	0.4375	0.734375	0.79021	0.307692	0.708934	0.609433
11810	0.902439	0.553571	0.714286	0.5	0.71875	0.762238	0.461538	0.711816	0.612095
11820	0.829268	0.517857	0.785714	0.5625	0.8125	0.699301	0.615385	0.700288	0.603703
11830	0.878049	0.625	0.214286	0.4375	0.703125	0.72028	0.538462	0.680115	0.574609
11840	0.902439	0.678571	0.714286	0.8125	0.703125	0.776224	0.615385	0.755043	0.67496
11850	0.878049	0.607143	0.5	0.5	0.6875	0.783217	0.615385	0.717579	0.62007
11860	0.829268	0.625	0.5	0.5	0.671875	0.79021	0.615385	0.714697	0.616283
11870	0.878049	0.571429	0.642857	0.5625	0.765625	0.804196	0.384615	0.73487	0.642099
11880	0.902439	0.553571	0.571429	0.3125	0.6875	0.846154	0.461538	0.726225	0.627674
11890	0.829268	0.535714	0.5	0.625	0.671875	0.776224	0.461538	0.694524	0.590463
11900	0.829268	0.625	0.5	0.6875	0.65625	0.699301	0.538462	0.680115	0.575049
11910	0.829268	0.589286	0.571429	0.5625	0.671875	0.776224	0.692308	0.711816	0.617001
11920	0.853659	0.732143	0.5	0.625	0.625	0.727273	0.615385	0.706052	0.60956
11930	0.829268	0.589286	0.5	0.625	0.703125	0.811189	0.615385	0.729107	0.637237
11940	0.878049	0.571429	0.5	0.4375	0.71875	0.755245	0.769231	0.708934	0.610403
11950	0.902439	0.607143	0.5	0.5	0.65625	0.846154	0.615385	0.740634	0.650043
11960	0.878049	0.625	0.285714	0.5	0.703125	0.79021	0.538462	0.714697	0.617638
11970	0.95122	0.625	0.571429	0.6875	0.75	0.783217	0.461538	0.746398	0.659712
11980	0.878049	0.625	0.357143	0.75	0.71875	0.825175	0.615385	0.74928	0.661837
11990	0.804878	0.75	0.642857	0.625	0.75	0.769231	0.615385	0.74928	0.666532
12000	0.878049	0.642857	0.357143	0.625	0.734375	0.811189	0.461538	0.737752	0.647246
12010	0.926829	0.607143	0.571429	0.625	0.71875	0.769231	0.384615	0.723343	0.62856
12020	0.878049	0.660714	0.571429	0.625	0.734375	0.811189	0.615385	0.755043	0.673177
12030	0.878049	0.571429	0.642857	0.625	0.65625	0.755245	0.461538	0.700288	0.599593
12040	0.902439	0.535714	0.642857	0.3125	0.75	0.79021	0.538462	0.717579	0.618169
12050	0.829268	0.714286	0.428571	0.625	0.78125	0.776224	0.692308	0.74928	0.667695
12060	0.804878	0.571429	0.571429	0.5625	0.6875	0.776224	0.461538	0.700288	0.597521
12070	0.878049	0.607143	0.357143	0.5625	0.734375	0.804196	0.538462	0.729107	0.634116
12080	0.95122	0.571429	0.5	0.5	0.78125	0.811189	0.538462	0.746398	0.659383
12090	0.926829	0.517857	0.428571	0.625	0.71875	0.832168	0.538462	0.73487	0.640663
12100	0.878049	0.553571	0.714286	0.6875	0.75	0.727273	0.538462	0.711816	0.615467
12110	0.878049	0.535714	0.428571	0.75	0.65625	0.825175	0.461538	0.720461	0.623131
12120	0.902439	0.660714	0.428571	0.6875	0.71875	0.811189	0.769231	0.757925	0.675673
12130	0.926829	0.660714	0.428571	0.5625	0.734375	0.804196	0.538462	0.746398	0.658137
12140	0.878049	0.553571	0.571429	0.5	0.765625	0.741259	0.538462	0.706052	0.607437
12150	0.902439	0.625	0.357143	0.625	0.703125	0.783217	0.230769	0.711816	0.615765
12160	0.829268	0.607143	0.5	0.625	0.6875	0.79021	0.692308	0.723343	0.627879
12170	0.902439	0.714286	0.571429	0.5	0.671875	0.846154	0.538462	0.760807	0.677058
12180	0.878049	0.607143	0.428571	0.375	0.6875	0.741259	0.692308	0.694524	0.590719
12190	0.95122	0.589286	0.428571	0.5	0.671875	0.776224	0.692308	0.717579	0.619317
12200	0.878049	0.696429	0.5	0.75	0.75	0.748252	0.461538	0.73487	0.647545
12210	0.853659	0.571429	0.571429	0.5625	0.75	0.818182	0.461538	0.73487	0.642953
12220	0.853659	0.642857	0.5	0.625	0.65625	0.818182	0.692308	0.737752	0.646492
12230	0.902439	0.678571	0.642857	0.5625	0.65625	0.783217	0.384615	0.726225	0.633744
12240	0.829268	0.732143	0.571429	0.4375	0.765625	0.79021	0.692308	0.752161	0.669259
12250	0.902439	0.607143	0.5	0.5625	0.65625	0.713287	0.692308	0.691643	0.588288
12260	0.853659	0.607143	0.571429	0.375	0.703125	0.748252	0.461538	0.694524	0.591805
12270	0.902439	0.553571	0.571429	0.4375	0.703125	0.776224	0.538462	0.708934	0.609716
12280	0.853659	0.767857	0.571429	0.6875	0.703125	0.748252	0.615385	0.740634	0.657386
12290	0.829268	0.571429	0.5	0.5	0.765625	0.776224	0.538462	0.714697	0.618675
12300	0.829268	0.642857	0.5	0.5625	0.65625	0.783217	0.461538	0.708934	0.611322
12310	0.902439	0.553571	0.571429	0.625	0.703125	0.839161	0.461538	0.740634	0.649114
12320	0.853659	0.732143	0.5	0.6875	0.75	0.748252	0.461538	0.73487	0.651924
12330	0.804878	0.607143	0.5	0.75	0.640625	0.734266	0.461538	0.685879	0.584957
12340	0.780488	0.714286	0.642857	0.5625	0.6875	0.727273	0.538462	0.706052	0.610988
12350	0.902439	0.589286	0.5	0.375	0.765625	0.797203	0.769231	0.737752	0.647079
12360	0.878049	0.660714	0.428571	0.75	0.6875	0.748252	0.615385	0.720461	0.627551
12370	0.853659	0.642857	0.785714	0.4375	0.765625	0.818182	0.538462	0.755043	0.669525
12380	0.829268	0.660714	0.571429	0.4375	0.640625	0.762238	0.384615	0.694524	0.591349
12390	0.878049	0.678571	0.5	0.6875	0.703125	0.762238	0.538462	0.729107	0.638353
12400	0.804878	0.696429	0.5	0.625	0.78125	0.734266	0.538462	0.723343	0.635498
12410	0.829268	0.535714	0.642857	0.4375	0.703125	0.762238	0.538462	0.694524	0.591023
12420	0.853659	0.642857	0.642857	0.5625	0.65625	0.755245	0.769231	0.717579	0.622347
12430	0.926829	0.625	0.428571	0.75	0.734375	0.783217	0.461538	0.737752	0.647328
12440	0.902439	0.642857	0.357143	0.5625	0.703125	0.762238	0.769231	0.723343	0.633674
12450	0.926829	0.642857	0.571429	0.4375	0.71875	0.769231	0.615385	0.729107	0.635861
12460	0.878049	0.678571	0.5	0.625	0.671875	0.72028	0.538462	0.70317	0.607647
12470	0.926829	0.642857	0.571429	0.625	0.6875	0.748252	0.615385	0.723343	0.630876
12480	0.902439	0.625	0.428571	0.6875	0.6875	0.755245	0.615385	0.717579	0.623841
12490	0.829268	0.571429	0.571429	0.625	0.765625	0.734266	0.384615	0.700288	0.600091
12500	0.97561	0.714286	0.642857	0.75	0.703125	0.832168	0.461538	0.78098	0.704347
12510	0.853659	0.642857	0.571429	0.4375	0.78125	0.825175	0.538462	0.752161	0.666127
12520	0.829268	0.5	0.571429	0.5	0.703125	0.776224	0.615385	0.697406	0.592288
12530	0.853659	0.732143	0.5	0.625	0.6875	0.727273	0.538462	0.714697	0.622251
12540	0.853659	0.642857	0.357143	0.5625	0.796875	0.72028	0.538462	0.708934	0.612913
12550	0.902439	0.714286	0.5	0.6875	0.75	0.692308	0.615385	0.720461	0.634018
12560	0.853659	0.696429	0.571429	0.4375	0.75	0.776224	0.692308	0.740634	0.653463
12570	0.878049	0.589286	0.5	0.5	0.71875	0.762238	0.384615	0.70317	0.600758
12580	0.878049	0.607143	0.428571	0.75	0.59375	0.79021	0.538462	0.708934	0.610253
12590	0.829268	0.607143	0.5	0.6875	0.703125	0.804196	0.461538	0.726225	0.633564
12600	0.829268	0.589286	0.5	0.4375	0.765625	0.776224	0.538462	0.714697	0.616657
12610	0.902439	0.696429	0.428571	0.625	0.6875	0.79021	0.538462	0.737752	0.646356
12620	0.829268	0.678571	0.642857	0.6875	0.71875	0.769231	0.538462	0.73487	0.645343
12630	0.95122	0.625	0.5	0.5	0.671875	0.783217	0.461538	0.720461	0.625392
12640	0.853659	0.714286	0.571429	0.5625	0.734375	0.818182	0.461538	0.755043	0.671065
12650	0.829268	0.571429	0.785714	0.5	0.6875	0.776224	0.384615	0.706052	0.606187
12660	0.926829	0.625	0.642857	0.625	0.796875	0.776224	0.538462	0.752161	0.66749
12670	0.804878	0.660714	0.714286	0.625	0.75	0.762238	0.461538	0.729107	0.641218
12680	0.95122	0.535714	0.642857	0.5	0.6875	0.804196	0.384615	0.720461	0.623586
12690	0.926829	0.553571	0.571429	0.75	0.765625	0.755245	0.384615	0.723343	0.6311
12700	0.926829	0.553571	0.571429	0.5625	0.6875	0.741259	0.615385	0.70317	0.603552
12710	0.804878	0.625	0.642857	0.625	0.75	0.748252	0.615385	0.720461	0.627923
12720	0.829268	0.607143	0.642857	0.5625	0.578125	0.783217	0.769231	0.706052	0.604494
12730	0.902439	0.625	0.357143	0.6875	0.6875	0.748252	0.615385	0.711816	0.614761
12740	0.804878	0.607143	0.5	0.6875	0.765625	0.811189	0.384615	0.73487	0.645349
12750	0.878049	0.642857	0.5	0.5	0.828125	0.769231	0.307692	0.731988	0.642786
12760	0.878049	0.696429	0.714286	0.625	0.75	0.748252	0.538462	0.740634	0.657213
12770	0.902439	0.714286	0.428571	0.4375	0.71875	0.811189	0.615385	0.74928	0.662831
12780	0.902439	0.625	0.5	0.375	0.796875	0.769231	0.384615	0.723343	0.628999
12790	0.878049	0.607143	0.714286	0.5625	0.71875	0.748252	0.461538	0.714697	0.618247
12800	0.829268	0.642857	0.642857	0.5625	0.65625	0.748252	0.692308	0.708934	0.6141
12810	0.829268	0.625	0.571429	0.6875	0.84375	0.783217	0.538462	0.752161	0.670408
12820	0.829268	0.678571	0.642857	0.6875	0.734375	0.741259	0.615385	0.729107	0.642962
12830	0.95122	0.696429	0.714286	0.625	0.75	0.762238	0.461538	0.752161	0.670918
12840	0.804878	0.607143	0.5	0.6875	0.703125	0.804196	0.538462	0.726225	0.632057
12850	0.829268	0.642857	0.642857	0.4375	0.796875	0.769231	0.538462	0.731988	0.64231
12860	0.829268	0.642857	0.5	0.5625	0.71875	0.734266	0.615385	0.706052	0.608355
12870	0.804878	0.625	0.642857	0.5	0.671875	0.734266	0.538462	0.691643	0.588289
12880	0.926829	0.642857	0.5	0.25	0.734375	0.783217	0.692308	0.729107	0.637851
12890	0.853659	0.571429	0.571429	0.625	0.734375	0.783217	0.307692	0.714697	0.614241
12900	0.926829	0.535714	0.571429	0.625	0.734375	0.79021	0.384615	0.723343	0.62721
12910	0.829268	0.571429	0.428571	0.25	0.71875	0.776224	0.615385	0.694524	0.587035
12920	0.804878	0.589286	0.785714	0.6875	0.765625	0.776224	0.307692	0.726225	0.634042
12930	0.878049	0.482143	0.571429	0.5625	0.6875	0.706294	0.538462	0.668588	0.558358
12940	0.878049	0.660714	0.571429	0.5625	0.6875	0.734266	0.538462	0.708934	0.612523
12950	0.829268	0.535714	0.285714	0.5	0.71875	0.825175	0.538462	0.711816	0.610706
12960	0.853659	0.571429	0.714286	0.75	0.65625	0.797203	0.615385	0.729107	0.636625
12970	0.902439	0.642857	0.642857	0.4375	0.765625	0.783217	0.538462	0.740634	0.652243
12980	0.902439	0.642857	0.642857	0.6875	0.734375	0.748252	0.384615	0.726225	0.635582
12990	0.780488	0.553571	0.642857	0.6875	0.78125	0.776224	0.538462	0.723343	0.629087
13000	0.926829	0.642857	0.5	0.5625	0.71875	0.776224	0.461538	0.729107	0.636419
13010	0.878049	0.732143	0.428571	0.5625	0.703125	0.748252	0.384615	0.717579	0.627294
13020	0.853659	0.553571	0.571429	0.625	0.71875	0.776224	0.692308	0.720461	0.624451
13030	0.95122	0.696429	0.571429	0.5625	0.734375	0.79021	0.692308	0.760807	0.679407
13040	0.829268	0.607143	0.571429	0.625	0.6875	0.727273	0.384615	0.688761	0.589597
13050	0.878049	0.642857	0.642857	0.6875	0.796875	0.748252	0.615385	0.743516	0.660109
13060	0.878049	0.5	0.428571	0.6875	0.703125	0.783217	0.692308	0.711816	0.613625
13070	0.853659	0.696429	0.642857	0.5625	0.703125	0.818182	0.384615	0.746398	0.658389
13080	0.878049	0.625	0.642857	0.4375	0.78125	0.811189	0.461538	0.746398	0.660963
13090	0.902439	0.714286	0.714286	0.625	0.734375	0.776224	0.461538	0.752161	0.668546
13100	0.853659	0.625	0.571429	0.4375	0.71875	0.783217	0.538462	0.720461	0.625623
13110	0.829268	0.696429	0.785714	0.625	0.703125	0.748252	0.538462	0.729107	0.641158
13120	0.926829	0.607143	0.571429	0.5625	0.640625	0.748252	0.384615	0.697406	0.593775
13130	0.878049	0.660714	0.571429	0.6875	0.6875	0.734266	0.615385	0.717579	0.625778
13140	0.902439	0.660714	0.642857	0.625	0.734375	0.741259	0.538462	0.729107	0.640736
13150	0.829268	0.732143	0.714286	0.625	0.71875	0.79021	0.692308	0.757925	0.678031
13160	0.878049	0.714286	0.642857	0.375	0.703125	0.804196	0.538462	0.743516	0.656716
13170	0.853659	0.5	0.357143	0.625	0.75	0.818182	0.461538	0.717579	0.619627
13180	0.926829	0.660714	0.642857	0.6875	0.734375	0.776224	0.384615	0.743516	0.657875
13190	0.902439	0.660714	0.5	0.6875	0.640625	0.79021	0.615385	0.731988	0.641994
13200	0.902439	0.642857	0.5	0.5625	0.71875	0.804196	0.538462	0.740634	0.650492
13210	0.682927	0.678571	0.285714	0.6875	0.703125	0.825175	0.538462	0.723343	0.62942
13220	0.95122	0.642857	0.5	0.375	0.734375	0.79021	0.384615	0.729107	0.635135
13230	0.926829	0.553571	0.5	0.5625	0.609375	0.727273	0.538462	0.677233	0.56622
13240	0.804878	0.660714	0.428571	0.5625	0.6875	0.811189	0.538462	0.726225	0.630704
13250	0.878049	0.535714	0.642857	0.4375	0.75	0.727273	0.538462	0.694524	0.592633
13260	0.878049	0.5	0.571429	0.5	0.71875	0.769231	0.538462	0.700288	0.598992
13270	0.878049	0.589286	0.571429	0.5625	0.75	0.748252	0.384615	0.708934	0.611114
13280	0.878049	0.571429	0.642857	0.6875	0.75	0.79021	0.538462	0.737752	0.64579
13290	0.926829	0.660714	0.571429	0.5	0.8125	0.755245	0.692308	0.74928	0.666493
13300	0.829268	0.660714	0.428571	0.5625	0.734375	0.797203	0.384615	0.726225	0.632604
13310	0.878049	0.535714	0.357143	0.625	0.71875	0.741259	0.461538	0.688761	0.582337
13320	0.926829	0.589286	0.642857	0.6875	0.8125	0.769231	0.307692	0.740634	0.654965
13330	0.926829	0.482143	0.714286	0.5	0.640625	0.797203	0.538462	0.706052	0.600799
13340	0.926829	0.589286	0.642857	0.5625	0.71875	0.741259	0.461538	0.711816	0.611275
13350	0.902439	0.607143	0.5	0.5	0.78125	0.769231	0.692308	0.73487	0.645294
13360	0.878049	0.571429	0.571429	0.375	0.703125	0.804196	0.615385	0.720461	0.622488
13370	0.902439	0.642857	0.5	0.625	0.75	0.776224	0.384615	0.731988	0.642395
13380	0.878049	0.696429	0.571429	0.75	0.703125	0.783217	0.461538	0.743516	0.658202
13390	0.926829	0.607143	0.428571	0.5	0.765625	0.79021	0.538462	0.73487	0.642245
13400	0.853659	0.625	0.571429	0.6875	0.703125	0.734266	0.538462	0.708934	0.61155
13410	0.902439	0.571429	0.714286	0.5625	0.8125	0.748252	0.615385	0.73487	0.647469
13420	0.902439	0.714286	0.5	0.625	0.734375	0.818182	0.538462	0.763689	0.682341
13430	0.902439	0.589286	0.428571	0.4375	0.8125	0.748252	0.846154	0.729107	0.638217
13440	0.902439	0.678571	0.357143	0.5	0.703125	0.79021	0.538462	0.729107	0.636875
13450	0.829268	0.571429	0.428571	0.4375	0.6875	0.797203	0.461538	0.700288	0.598307
13460	0.829268	0.696429	0.357143	0.5	0.8125	0.769231	0.384615	0.729107	0.638627
13470	0.804878	0.571429	0.5	0.5625	0.71875	0.804196	0.538462	0.717579	0.621297
13480	0.902439	0.642857	0.642857	0.625	0.71875	0.762238	0.384615	0.726225	0.633772
13490	0.926829	0.5	0.571429	0.4375	0.671875	0.776224	0.692308	0.70317	0.601708
13500	0.853659	0.625	0.642857	0.375	0.8125	0.79021	0.769231	0.74928	0.664706
13510	0.902439	0.642857	0.857143	0.3125	0.765625	0.804196	0.538462	0.752161	0.666265
13520	0.878049	0.625	0.642857	0.6875	0.671875	0.769231	0.538462	0.723343	0.628438
13530	0.829268	0.678571	0.571429	0.625	0.75	0.797203	0.615385	0.74928	0.664777
13540	0.853659	0.714286	0.571429	0.3125	0.6875	0.748252	0.461538	0.706052	0.607413
13550	0.878049	0.607143	0.571429	0.5	0.765625	0.762238	0.769231	0.731988	0.639515
13560	0.780488	0.571429	0.5	0.5	0.71875	0.762238	0.615385	0.697406	0.594054
13570	0.95122	0.642857	0.571429	0.4375	0.703125	0.769231	0.461538	0.723343	0.628413
13580	0.878049	0.607143	0.714286	0.625	0.625	0.713287	0.538462	0.688761	0.585562
13590	0.878049	0.607143	0.5	0.5625	0.71875	0.755245	0.615385	0.714697	0.619318
13600	0.95122	0.696429	0.5	0.5	0.765625	0.762238	0.615385	0.746398	0.664884
13610	0.780488	0.607143	0.714286	0.5	0.578125	0.755245	0.461538	0.677233	0.570008
13620	0.878049	0.660714	0.714286	0.5625	0.734375	0.755245	0.538462	0.731988	0.644117
13630	0.902439	0.642857	0.642857	0.6875	0.734375	0.79021	0.615385	0.752161	0.668214
13640	0.829268	0.696429	0.642857	0.4375	0.734375	0.762238	0.692308	0.731988	0.643594
13650	0.853659	0.589286	0.571429	0.5	0.765625	0.776224	0.384615	0.717579	0.620956
13660	0.902439	0.535714	0.571429	0.625	0.71875	0.832168	0.538462	0.740634	0.650528
13670	0.878049	0.660714	0.357143	0.5	0.8125	0.769231	0.538462	0.73487	0.645239
13680	0.853659	0.589286	0.428571	0.6875	0.65625	0.755245	0.384615	0.691643	0.589726
13690	0.853659	0.535714	0.571429	0.625	0.8125	0.755245	0.538462	0.720461	0.625759
13700	0.926829	0.607143	0.571429	0.5625	0.734375	0.762238	0.461538	0.723343	0.628563
13710	0.902439	0.607143	0.785714	0.6875	0.78125	0.755245	0.615385	0.746398	0.663126
13720	0.902439	0.625	0.714286	0.5	0.6875	0.797203	0.538462	0.73487	0.644632
13730	0.853659	0.625	0.571429	0.4375	0.75	0.685315	0.692308	0.691643	0.588581
13740	0.95122	0.517857	0.285714	0.375	0.71875	0.832168	0.307692	0.711816	0.60685
13750	0.853659	0.607143	0.357143	0.6875	0.640625	0.748252	0.692308	0.697406	0.595284
13760	0.853659	0.589286	0.642857	0.625	0.6875	0.832168	0.307692	0.731988	0.636855
13770	0.804878	0.589286	0.428571	0.5	0.671875	0.797203	0.230769	0.691643	0.584086
13780	0.878049	0.714286	0.428571	0.375	0.765625	0.734266	0.384615	0.711816	0.618176
13790	0.829268	0.607143	0.5	0.625	0.671875	0.79021	0.538462	0.714697	0.616101
13800	0.902439	0.660714	0.571429	0.6875	0.703125	0.804196	0.307692	0.740634	0.65312
13810	0.780488	0.607143	0.5	0.5625	0.671875	0.797203	0.615385	0.711816	0.610955
13820	0.804878	0.642857	0.571429	0.875	0.796875	0.79021	0.538462	0.755043	0.673763
13830	0.878049	0.589286	0.357143	0.4375	0.796875	0.818182	0.384615	0.731988	0.637606
13840	0.853659	0.625	0.5	0.75	0.671875	0.79021	0.692308	0.731988	0.63998
13850	0.853659	0.553571	0.5	0.375	0.734375	0.825175	0.461538	0.720461	0.62103
13860	0.902439	0.535714	0.285714	0.5625	0.640625	0.741259	0.615385	0.677233	0.566568
13870	0.902439	0.553571	0.642857	0.625	0.78125	0.839161	0.538462	0.760807	0.676759
13880	0.878049	0.660714	0.642857	0.625	0.765625	0.762238	0.692308	0.746398	0.661331
13890	0.804878	0.678571	0.642857	0.5625	0.671875	0.727273	0.692308	0.706052	0.610631
13900	0.829268	0.696429	0.428571	0.6875	0.765625	0.769231	0.615385	0.740634	0.654574
13910	0.902439	0.553571	0.571429	0.75	0.734375	0.818182	0.538462	0.746398	0.659187
13920	0.804878	0.571429	0.571429	0.4375	0.703125	0.79021	0.384615	0.700288	0.595261
13930	0.926829	0.660714	0.5	0.5	0.671875	0.797203	0.615385	0.73487	0.643865
13940	0.853659	0.535714	0.785714	0.5	0.734375	0.797203	0.615385	0.729107	0.635693
13950	0.853659	0.625	0.5	0.6875	0.75	0.804196	0.538462	0.743516	0.655704
13960	0.853659	0.535714	0.5	0.5625	0.765625	0.699301	0.461538	0.680115	0.573949
13970	0.853659	0.642857	0.5	0.625	0.734375	0.755245	0.461538	0.717579	0.623514
13980	0.878049	0.642857	0.428571	0.625	0.640625	0.762238	0.384615	0.700288	0.597462
13990	0.878049	0.553571	0.571429	0.5625	0.671875	0.776224	0.461538	0.70317	0.599742
14000	0.926829	0.642857	0.5	0.375	0.65625	0.769231	0.538462	0.708934	0.609859
14010	0.902439	0.678571	0.5	0.3125	0.75	0.776224	0.615385	0.731988	0.639807
14020	0.853659	0.678571	0.5	0.4375	0.75	0.804196	0.615385	0.743516	0.656559
14030	0.902439	0.625	0.571429	0.625	0.78125	0.825175	0.384615	0.757925	0.674297
14040	0.926829	0.642857	0.357143	0.5	0.5625	0.692308	0.769231	0.668588	0.562214
14050	0.853659	0.589286	0.571429	0.5	0.703125	0.776224	0.230769	0.700288	0.595344
14060	0.902439	0.625	0.5	0.4375	0.65625	0.804196	0.692308	0.726225	0.632371
14070	0.878049	0.732143	0.642857	0.625	0.796875	0.72028	0.461538	0.737752	0.656242
14080	0.878049	0.714286	0.714286	0.5625	0.671875	0.79021	0.153846	0.729107	0.638897
14090	0.829268	0.589286	0.571429	0.625	0.71875	0.769231	0.384615	0.708934	0.609323
14100	0.829268	0.625	0.785714	0.5625	0.75	0.769231	0.461538	0.729107	0.639461
14110	0.853659	0.642857	0.714286	0.6875	0.71875	0.797203	0.692308	0.752161	0.668777
14120	0.902439	0.696429	0.642857	0.5	0.59375	0.762238	0.538462	0.711816	0.614893
14130	0.902439	0.678571	0.5	0.625	0.671875	0.804196	0.615385	0.743516	0.658252
14140	0.853659	0.589286	0.642857	0.625	0.734375	0.734266	0.692308	0.714697	0.619503
14150	0.902439	0.553571	0.642857	0.4375	0.734375	0.797203	0.692308	0.731988	0.639188
14160	0.878049	0.660714	0.571429	0.5625	0.703125	0.769231	0.615385	0.729107	0.63795
14170	0.902439	0.678571	0.642857	0.5	0.71875	0.748252	0.384615	0.720461	0.625846
14180	0.878049	0.642857	0.571429	0.5625	0.765625	0.741259	0.307692	0.714697	0.619534
14190	0.902439	0.607143	0.785714	0.625	0.734375	0.797203	0.461538	0.746398	0.661262
14200	0.926829	0.553571	0.571429	0.6875	0.703125	0.797203	0.615385	0.73487	0.644775
14210	0.902439	0.589286	0.642857	0.5	0.765625	0.741259	0.615385	0.720461	0.627439
14220	0.878049	0.535714	0.857143	0.75	0.71875	0.825175	0.538462	0.752161	0.665506
14230	0.829268	0.571429	0.357143	0.625	0.703125	0.776224	0.538462	0.70317	0.598666
14240	0.926829	0.589286	0.428571	0.625	0.65625	0.839161	0.307692	0.729107	0.635404
14250	0.853659	0.625	0.5	0.3125	0.65625	0.748252	0.384615	0.680115	0.572344
14260	0.926829	0.589286	0.642857	0.5625	0.65625	0.769231	0.692308	0.720461	0.623158
14270	0.829268	0.392857	0.5	0.4375	0.765625	0.832168	0.769231	0.714697	0.613935
14280	0.853659	0.607143	0.5	0.5625	0.75	0.79021	0.615385	0.731988	0.64093
14290	0.878049	0.571429	0.428571	0.625	0.6875	0.79021	0.461538	0.711816	0.609948
14300	0.926829	0.607143	0.642857	0.625	0.71875	0.769231	0.384615	0.726225	0.63228
14310	0.804878	0.678571	0.428571	0.375	0.734375	0.783217	0.461538	0.714697	0.619393
14320	0.829268	0.660714	0.285714	0.625	0.65625	0.804196	0.384615	0.711816	0.613515
14330	0.878049	0.607143	0.642857	0.625	0.6875	0.79021	0.461538	0.726225	0.631729
14340	0.926829	0.589286	0.5	0.5	0.640625	0.79021	0.538462	0.711816	0.610308
14350	0.853659	0.642857	0.571429	0.6875	0.75	0.769231	0.769231	0.743516	0.657309
14360	0.853659	0.535714	0.785714	0.5625	0.71875	0.818182	0.461538	0.731988	0.638422
14370	0.853659	0.607143	0.428571	0.5	0.71875	0.72028	0.769231	0.697406	0.598672
14380	0.902439	0.660714	0.5	0.5	0.71875	0.776224	0.307692	0.720461	0.625386
14390	0.878049	0.660714	0.357143	0.5625	0.703125	0.79021	0.692308	0.731988	0.641202
14400	0.878049	0.607143	0.357143	0.625	0.703125	0.776224	0.307692	0.706052	0.604822
14410	0.853659	0.625	0.571429	0.375	0.6875	0.741259	0.615385	0.697406	0.595361
14420	0.829268	0.607143	0.428571	0.5625	0.765625	0.797203	0.538462	0.729107	0.634904
14430	0.853659	0.75	0.285714	0.3125	0.6875	0.776224	0.615385	0.717579	0.624992
14440	0.853659	0.607143	0.571429	0.625	0.703125	0.727273	0.615385	0.70317	0.605046
14450	0.878049	0.589286	0.714286	0.5	0.734375	0.762238	0.384615	0.714697	0.614891
14460	0.902439	0.696429	0.642857	0.4375	0.75	0.776224	0.769231	0.752161	0.668585
14470	0.804878	0.660714	0.428571	0.6875	0.71875	0.79021	0.615385	0.731988	0.640339
14480	0.829268	0.642857	0.5	0.6875	0.671875	0.804196	0.615385	0.731988	0.640254
14490	0.853659	0.642857	0.5	0.6875	0.84375	0.762238	0.692308	0.752161	0.670274
14500	0.829268	0.607143	0.571429	0.375	0.609375	0.741259	0.615385	0.677233	0.571606
14510	0.902439	0.642857	0.357143	0.625	0.671875	0.776224	0.538462	0.717579	0.619433
14520	0.804878	0.642857	0.571429	0.4375	0.75	0.72028	0.461538	0.694524	0.596205
14530	0.902439	0.678571	0.5	0.5	0.734375	0.762238	0.615385	0.731988	0.644733
14540	0.878049	0.625	0.571429	0.5625	0.78125	0.797203	0.538462	0.746398	0.659589
14550	0.95122	0.607143	0.571429	0.4375	0.734375	0.741259	0.692308	0.720461	0.627634
14560	0.95122	0.571429	0.571429	0.5625	0.71875	0.818182	0.615385	0.746398	0.657555
14570	0.853659	0.642857	0.571429	0.625	0.765625	0.79021	0.615385	0.746398	0.659219
14580	0.780488	0.625	0.5	0.5625	0.84375	0.748252	0.538462	0.723343	0.635203
14590	0.829268	0.607143	0.571429	0.6875	0.75	0.783217	0.615385	0.73487	0.644937
14600	0.878049	0.767857	0.285714	0.5625	0.703125	0.748252	0.461538	0.720461	0.631373
14610	0.926829	0.589286	0.571429	0.75	0.734375	0.762238	0.461538	0.729107	0.637341
14620	0.902439	0.642857	0.642857	0.5	0.6875	0.734266	0.615385	0.711816	0.617576
14630	0.97561	0.571429	0.285714	0.6875	0.75	0.748252	0.615385	0.720461	0.626171
14640	0.780488	0.517857	0.571429	0.5625	0.765625	0.748252	0.461538	0.691643	0.5864
14650	0.878049	0.714286	0.642857	0.5625	0.828125	0.748252	0.461538	0.74928	0.667441
14660	0.878049	0.589286	0.357143	0.5625	0.65625	0.748252	0.692308	0.694524	0.591992
14670	0.829268	0.535714	0.5	0.625	0.703125	0.713287	0.538462	0.677233	0.56914
14680	0.829268	0.660714	0.5	0.5625	0.71875	0.762238	0.615385	0.720461	0.626397
14690	0.902439	0.607143	0.571429	0.625	0.734375	0.783217	0.615385	0.737752	0.649596
14700	0.902439	0.642857	0.785714	0.625	0.6875	0.72028	0.538462	0.714697	0.621355
14710	0.878049	0.571429	0.428571	0.375	0.78125	0.762238	0.692308	0.714697	0.616684
14720	0.878049	0.660714	0.5	0.4375	0.703125	0.811189	0.692308	0.740634	0.64962
14730	0.878049	0.607143	0.642857	0.5625	0.609375	0.769231	0.384615	0.697406	0.594929
14740	0.829268	0.642857	0.5	0.625	0.78125	0.804196	0.692308	0.752161	0.66937
14750	0.878049	0.517857	0.5	0.6875	0.640625	0.797203	0.230769	0.694524	0.585069
14760	0.902439	0.589286	0.571429	0.5	0.75	0.783217	0.769231	0.737752	0.647929
14770	0.853659	0.553571	0.357143	0.625	0.703125	0.762238	0.769231	0.706052	0.605799
14780	0.97561	0.678571	0.5	0.625	0.75	0.79021	0.615385	0.760807	0.680503
14790	0.926829	0.571429	0.571429	0.375	0.71875	0.776224	0.461538	0.711816	0.611816
14800	0.95122	0.660714	0.571429	0.4375	0.78125	0.699301	0.538462	0.714697	0.625654
14810	0.926829	0.625	0.571429	0.5	0.8125	0.769231	0.538462	0.743516	0.656998
14820	0.878049	0.589286	0.5	0.5	0.71875	0.818182	0.384615	0.726225	0.630077
14830	0.853659	0.625	0.642857	0.5625	0.734375	0.79021	0.461538	0.731988	0.63884
14840	0.756098	0.553571	0.571429	0.5625	0.71875	0.783217	0.538462	0.70317	0.602974
14850	0.926829	0.571429	0.571429	0.5625	0.65625	0.811189	0.307692	0.717579	0.619744
14860	0.853659	0.660714	0.5	0.5	0.828125	0.741259	0.461538	0.726225	0.636082
14870	0.902439	0.553571	0.428571	0.8125	0.84375	0.811189	0.615385	0.763689	0.682344
14880	0.902439	0.607143	0.428571	0.5	0.71875	0.755245	0.384615	0.70317	0.599926
14890	0.878049	0.696429	0.714286	0.875	0.75	0.748252	0.538462	0.752161	0.671643
14900	0.902439	0.571429	0.357143	0.4375	0.75	0.755245	0.538462	0.70317	0.601765
14910	0.853659	0.625	0.357143	0.4375	0.71875	0.727273	0.692308	0.694524	0.593741
14920	0.878049	0.642857	0.571429	0.25	0.703125	0.776224	0.538462	0.711816	0.61309
14930	0.926829	0.625	0.357143	0.5625	0.71875	0.762238	0.461538	0.714697	0.618439
14940	0.853659	0.589286	0.428571	0.3125	0.765625	0.72028	0.538462	0.685879	0.581052
14950	0.878049	0.75	0.642857	0.6875	0.734375	0.776224	0.615385	0.760807	0.682597
14960	0.804878	0.589286	0.571429	0.5	0.65625	0.797203	0.461538	0.70317	0.600366
14970	0.853659	0.607143	0.571429	0.5625	0.71875	0.699301	0.692308	0.694524	0.596296
14980	0.829268	0.589286	0.428571	0.5625	0.640625	0.776224	0.461538	0.691643	0.584828
14990	0.853659	0.642857	0.428571	0.8125	0.625	0.797203	0.538462	0.723343	0.631204
15000	0.853659	0.642857	0.5	0.6875	0.703125	0.818182	0.461538	0.740634	0.652822
15010	0.878049	0.553571	0.642857	0.75	0.71875	0.818182	0.461538	0.740634	0.650496
15020	0.878049	0.571429	0.5	0.4375	0.734375	0.783217	0.538462	0.714697	0.616039
15030	0.902439	0.714286	0.357143	0.5625	0.828125	0.776224	0.384615	0.74928	0.667798
15040	0.878049	0.785714	0.5	0.625	0.71875	0.79021	0.230769	0.746398	0.664187
15050	0.804878	0.571429	0.357143	0.5	0.765625	0.818182	0.461538	0.720461	0.623119
15060	0.902439	0.571429	0.642857	0.5625	0.75	0.748252	0.615385	0.720461	0.626817
15070	0.853659	0.535714	0.571429	0.6875	0.6875	0.79021	0.461538	0.711816	0.610682
15080	0.853659	0.517857	0.714286	0.5625	0.734375	0.783217	0.615385	0.720461	0.625885
15090	0.804878	0.625	0.5	0.5	0.6875	0.769231	0.538462	0.70317	0.603427
15100	0.902439	0.660714	0.642857	0.75	0.765625	0.783217	0.538462	0.757925	0.677959
15110	0.97561	0.607143	0.571429	0.6875	0.71875	0.811189	0.692308	0.760807	0.678278
15120	0.853659	0.714286	0.642857	0.5625	0.75	0.727273	0.615385	0.729107	0.642232
15130	0.926829	0.607143	0.5	0.625	0.765625	0.818182	0.615385	0.757925	0.673777
15140	0.878049	0.625	0.571429	0.625	0.734375	0.755245	0.615385	0.726225	0.633747
15150	0.878049	0.696429	0.571429	0.625	0.71875	0.72028	0.692308	0.723343	0.634542
15160	0.731707	0.553571	0.714286	0.5	0.71875	0.741259	0.615385	0.688761	0.587848
15170	0.804878	0.589286	0.571429	0.6875	0.78125	0.762238	0.538462	0.723343	0.629641
15180	0.878049	0.732143	0.857143	0.3125	0.734375	0.797203	0.384615	0.74928	0.666656
15190	0.902439	0.625	0.428571	0.75	0.734375	0.804196	0.538462	0.746398	0.659451
15200	0.878049	0.625	0.5	0.6875	0.71875	0.783217	0.615385	0.73487	0.645528
15210	0.902439	0.642857	0.5	0.375	0.671875	0.79021	0.615385	0.720461	0.624942
15220	0.95122	0.589286	0.642857	0.4375	0.6875	0.783217	0.461538	0.720461	0.622596
15230	0.878049	0.535714	0.5	0.625	0.71875	0.762238	0.384615	0.700288	0.596743
15240	0.878049	0.571429	0.571429	0.5	0.71875	0.79021	0.461538	0.717579	0.618341
15250	0.926829	0.571429	0.357143	0.5	0.734375	0.769231	0.538462	0.711816	0.613823
15260	0.878049	0.607143	0.642857	0.5	0.71875	0.713287	0.692308	0.70317	0.607452
15270	0.853659	0.642857	0.571429	0.375	0.734375	0.741259	0.615385	0.708934	0.612551
15280	0.878049	0.625	0.571429	0.5625	0.71875	0.825175	0.615385	0.74928	0.661437
15290	0.804878	0.642857	0.285714	0.375	0.78125	0.818182	0.538462	0.729107	0.636412
15300	0.926829	0.678571	0.5	0.3125	0.78125	0.811189	0.461538	0.74928	0.663381
[truncated: 2,708 more rows]
