# Supplementary material for: Distinguishing Glioblastoma Subtypes by Methylation Signatures
Source: Front Genet. 2020 Nov 24;11:604336. doi: 10.3389/fgene.2020.604336 (PMC7732602; doi:10.3389/fgene.2020.604336)
Supplement: Supplementary Table 3 — Genes corresponding to the top-ranked features by MCFS. [file Table_3.XLSX]

## Sheet: Sheet1
Index	Gene symbol
1	CXCR4
2	CYP4X1
3	TBX18
4	SP5
5	LOC440925
6	TMEM22
7	BARHL2
8	RASGRF2
9	TLX3
10	ANKRD34A
11	RBP1
12	RGMB
13	RAB6C
14	PANK4
15	FOXE3
16	CSRP1
17	RANBP17
18	FOXQ1
19	PRDM16
20	GABRD
21	FBLN7
22	LOC150786
23	ASB5
24	FAM172A
25	MIR2277
26	FAM190A
27	SYNCRIP
28	C6orf15
29	NPHP4
30	GRM6
31	GPR6
32	HIST2H2BF
33	HIST2H3D
34	EMB
35	ANKRD34B
36	DHRS3
37	HCN1
38	LYPD1
39	BCL6
40	DNAH14
41	BFSP2
42	FLJ22536
43	RAMP1
44	TNXB
45	PRKCZ
46	HOXD11
47	MOSC1
48	PCDH10
49	LRP1B
50	TPPP
51	CRMP1
52	PFN4
53	LOC375190
54	INHBB
55	TPBG
56	NR2E1
57	ATP2B4
58	SLC6A19
59	HIST1H4A
60	ENPP6
61	PITX2
62	HDAC4
63	RCC2
64	HOXD8
65	DPP10
66	HOXD9
67	MKNK1
68	MSX2
69	LHFPL2
70	ZNF184
71	SH3BP4
72	LOC150622
73	CNGA3
74	RAB28
75	UGT8
76	ANKRD43
77	MYLK4
78	GSX2
79	FLJ37453
80	C2orf70
81	CCND3
82	C1orf124
83	EXOC8
84	VANGL2
85	CASZ1
86	CD8A
87	SLC12A7
88	RBM47
89	ZIC4
90	MSX1
91	KIF26B
92	CCL28
93	PPP1R3G
94	HDAC11
95	ARMC9
96	RREB1
97	ZNF718
98	TAS1R3
99	IL1RN
100	SMPDL3A
101	SKI
102	ANK2
103	HK3
104	MRAS
105	NEUROG1
106	PRDM6
107	SORCS2
108	NRN1
109	C6orf64
110	KIAA1530
111	LPCAT1
112	ACAP3
113	EFNA5
114	STK25
115	PLEK
116	PDE4B
117	HOXD12
118	CRCT1
119	EPB41
120	PCDHGA4
121	PCDHGA12
122	PCDHGA11
123	PCDHGA9
124	PCDHGA1
125	PCDHGB1
126	PCDHGC3
127	PCDHGB6
128	PCDHGB3
129	PCDHGB7
130	PCDHGA6
131	PCDHGA8
132	PCDHGA10
133	PCDHGA5
134	PCDHGB4
135	PCDHGA3
136	PCDHGA2
137	PCDHGA7
138	PCDHGB2
139	PCDHGB5
140	WDR69
141	COL23A1
142	SLC9A3
143	SLC6A3
144	FKBP5
145	PCDH12
146	CCDC149
147	TSSC1
148	SH3PXD2B
149	ZEB2
150	KHDRBS2
151	CELSR3
152	KIF5C
153	SLC35F3
154	FOXP1
155	PLEKHG5
156	AHSG
157	F12
158	IRX2
159	PPARG
160	CACHD1
161	RASGEF1C
162	FOXD3
163	IL1R2
164	TRIM58
165	PXDN
166	LOC100130872
167	LOC100130872-SPON2
168	TRIM36
169	FKBP7
170	PLEKHA3
171	MIR548N
172	NR4A2
173	COL11A2
174	ZBTB38
175	HCG18
176	CLIC1
177	DDAH2
178	LPAR3
179	SFT2D3
180	PARP1
181	C1orf77
182	S100A13
183	C1orf228
184	TMEM53
185	RHBDL2
186	GPR17
187	LIMS2
188	PLD5
189	IGFBP2
190	KIF13A
191	CMYA5
192	KCNIP3
193	AGAP1
194	LRRFIP1
195	C4orf52
196	WDR27
197	NRXN1
198	PCDHB17
199	PWWP2A
200	CDC42BPA
201	CUL7
202	EXOC2
203	GLI2
204	PDE6B
205	MEGF6
206	TERC
207	FLJ42709
208	CKS1B
209	BTNL9
210	FGD5
211	SH3TC1
212	MCC
213	LHX8
214	GMDS
215	GAK
216	POLR2D
217	CDC73
218	S100A1
219	ZDHHC14
220	GABBR1
221	THRB
222	C5orf38
223	MYT1L
224	USP13
225	LOC400940
226	PAQR6
227	MICA
228	FAM5B
229	NAV1
230	LOC647121
231	SPSB1
232	RAD18
233	PEX3
234	TMIE
235	STK10
236	FAM163A
237	C2orf55
238	SH3RF3
239	SYNJ2
240	ELOVL2
241	HDLBP
242	PHACTR1
243	RTKN
244	PCDHGB8P
245	SERINC5
246	LOC728661
247	CDK11B
248	WHSC1
249	CDX1
250	ADAMTS2
251	NRP2
252	FGFR3
253	TAF1B
254	IRF4
255	TUBB
256	GP9
257	C6orf105
258	RGS12
259	NKD2
260	IQCF1
261	FOXP4
262	MYO10
263	ATP13A2
264	PRDM1
265	BRD9
266	SGMS2
267	HAND2
268	MYO7B
269	LOX
270	TNK2
271	LOC729375
272	SLC22A16
273	HSPG2
274	LOC285375
275	SPP1
276	SPSB4
277	GRM4
278	ALLC
279	PTPN7
280	CTNND2
281	AIG1
282	VWA5B1
283	UBE4B
284	ADORA3
285	MYO1B
286	ETV7
287	RAB17
288	FLJ32063
289	ADRA2C
290	MAP3K6
291	SGIP1
292	MFI2
293	DDX41
294	SEMA3F
295	HIST1H2BI
296	RASL11B
297	HIST1H4F
298	JARID2
299	GTF2H2C
300	GTF2H2D
301	FHL2
302	WDR64
303	ACOX3
304	MFSD4
305	CHCHD6
306	C5orf45
307	TAL1
308	HES1
309	H6PD
310	CTLA4
311	UBXN11
312	PRRT1
313	LIPH
314	FAM169A
315	SCNM1
316	LYSMD1
317	SLC11A1
318	EHHADH
319	WISP3
320	FZD5
321	KIF25
322	SLC1A3
323	ABLIM2
324	ABTB1
325	NHSL1
326	FHIT
327	PACRG
328	CALML6
329	IL1F8
330	LTA
331	CNTN3
332	GBX2
333	CYP27C1
334	PLA2R1
335	BMP6
336	BGLAP
337	PCGF3
338	DLL1
339	NOTCH4
340	DAXX
341	SNAR-H
342	EPHB2
343	LOC151534
344	LBX2
345	AGPAT4
346	SPATA24
347	KLF11
348	TPO
349	NFASC
350	SNCA
351	HOXD3
352	ITPKB
353	VASH2
354	CD80
355	RBMS1
356	LOC100132215
357	TCTEX1D1
358	GRIP2
359	CDYL
360	TRIO
361	ECEL1P2
362	HIVEP3
363	BEND4
364	PDCD1
365	ISL1
366	IQSEC1
367	GABRB2
368	ADRA1B
369	PRR16
370	C1orf59
371	OTP
372	NFIA
373	FOXD2
374	PDPN
375	RBM15B
376	DUSP5P
377	S100A12
378	KCNJ3
379	DOK1
380	ESRRG
381	MYSM1
382	NOTCH2
383	RGL2
384	IGSF21
385	ZC3H12D
386	HFM1
387	SGK1
388	TLR9
389	ARHGAP10
390	HEYL
391	KCNJ9
392	PCBP4
393	BRPF3
394	ALDH4A1
395	ADORA1
396	C6orf154
397	CAMTA1
398	ELL2
399	TMEM177
400	MIIP
401	ZBTB11
402	LOC100009676
403	SLC6A18
404	AGPAT1
405	DDR1
406	FOXD4L1
407	SPOCK1
408	MIR190B
409	CPNE5
410	CCDC74B
411	FBXO41
412	RPS6KA2
413	PLAGL1
414	HIST1H4L
415	HIST1H3I
416	VAX2
417	QRICH1
418	C1orf170
419	HPCAL1
420	GPR27
421	EIF4E3
422	RPRM
423	SERAC1
424	GTF2H5
425	IL17RC
426	ZNF141
427	GRK4
428	TAP2
429	TMEM175
430	OBSL1
431	INHA
432	GALE
433	ZBTB47
434	ACTA1
435	ARSI
436	CELSR2
437	KIF9
438	KLHL18
439	ZNF683
440	ITPR3
441	HOPX
442	SIM1
443	DHFR
444	MSH3
445	FBLL1
446	NLRC4
447	EML6
448	MLPH
449	C1orf187
450	C2orf82
451	FAM53A
452	MGLL
453	IRX1
454	C1orf183
455	GALNT2
456	PDLIM4
457	LASS2
458	LOC100302640
459	SNTG2
460	AK3L1
461	EFCAB2
462	EHMT2
463	ATOH8
464	PPP1R11
465	PPP2R5A
466	RAB43
467	MXD4
468	PTGER3
469	SSBP3
470	PLEKHN1
471	C6orf115
472	DDAH1
473	DEF6
474	DNM3
475	FAM65B
476	EIF4EBP3
477	ANKHD1-EIF4EBP3
478	TMEM51
479	HLA-DOA
480	PQLC3
481	C3orf19
482	KIAA1486
483	SPATA4
484	COLEC11
485	MTHFD1L
486	WWTR1
487	CDH18
488	EFR3B
489	ECHDC1
490	C1orf87
491	HIST1H1A
492	SLC6A20
493	ATR
494	PLEKHG4B
495	NKX6-1
496	ARID1B
497	FAM194A
498	CDSN
499	PSORS1C1
500	PROM1
501	PPP1R2P1
502	PRR18
503	MIR219-1
504	LOC375196
505	LOC100271715
506	GTF2E1
507	RABL3
508	CPSF3L
509	KLF7
510	RAPGEF2
511	UGDH
512	PTPRK
513	RHOA
514	TCTA
515	FGFRL1
516	RNF39
517	ALK
518	COL16A1
519	DGKG
520	LOC100133612
521	C1orf94
522	C6orf136
523	PCMT1
524	RXFP3
525	STXBP5
526	KIFC1
527	ZNF827
528	DMRTA2
529	PTPRV
530	DSP
531	LRRC14B
532	COL6A3
533	VGLL4
534	SPTBN1
535	LETM1
536	NCRNA00171
537	DGKQ
538	TRIM71
539	SCD5
540	C3orf21
541	NHLRC1
542	WHSC2
543	C1orf53
544	RAB7L1
545	URB2
546	TAF5L
547	KY
548	RAB32
549	SLC44A3
550	PHC2
551	PPP2CA
552	ATF6B
553	ERI3
554	PAX3
555	CCDC140
556	C5orf62
557	WNT5A
558	AP2M1
559	AGRN
560	BTN1A1
561	TULP4
562	SLC33A1
563	SYTL1
564	SLC29A1
565	EHBP1
566	HIST1H2AM
567	HIST1H2BO
568	ANTXR1
569	CREG2
570	CACNA1D
571	DFFB
572	NMUR1
573	STEAP3
574	DNMT3A
575	C5orf20
576	SLC38A11
577	AURKAIP1
578	NLGN1
579	NTRK1
580	TDRD10
581	SHE
582	SESN1
583	C6orf182
584	EIF2B5
585	GMPPA
586	CAB39
587	FLNB
588	ANKRD33B
589	LIMCH1
590	SH3BP2
591	MGST2
592	HTR6
593	TAPBP
594	ZIC1
595	VEPH1
596	HIVEP2
597	LACE1
598	C6orf123
599	ZYG11A
600	CELA3A
601	TERT
602	MAN2B2
603	PRPF4B
604	LOC285830
605	TRIM41
606	PID1
607	GABRB1
608	TTC29
609	ESPNL
610	LOC728989
611	NCKAP5
612	CLCN6
613	IGFN1
614	FGF12
615	VSIG8
616	C1orf204
617	SHISA4
618	PDLIM3
619	PKD2L2
620	GK2
621	PBX1
622	PRSS12
623	FBXL21
624	CPOX
625	LARP7
626	C4orf21
627	CMBL
628	CCDC150
629	DOK7
630	ARPP-21
631	C1orf122
632	YRDC
633	TMEM37
634	SGPP2
635	SYPL2
636	SLC26A1
637	NUDT16
638	HCG9
639	ZDHHC11
640	SPATS2L
641	DNAH1
642	TSPAN17
643	KIAA1751
644	LGALS8
645	TBC1D14
646	KCNQ5
647	MORN1
648	C1orf86
649	CDH12
650	IRX4
651	KISS1
652	ZBTB7B
653	HPDL
654	WDR46
655	DZIP1L
656	ITGA6
657	TGFB2
658	AGL
659	HLA-A
660	STX18
661	EPHA8
662	AHRR
663	AGFG1
664	GTF2H4
665	TMEM88B
666	FAF1
667	F2R
668	KLHL29
669	SFRP2
670	ABT1
671	DTYMK
672	GLO1
673	HOXD10
674	GFPT1
675	MCL1
676	SOX14
677	FNDC3B
678	BAT2
679	SCAMP3
680	NBEAL2
681	KIAA1715
682	ELOVL1
683	LOC151174
684	LOC643387
685	SYNGAP1
686	ANO7
687	WDR8
688	TMEM52
689	TP73
690	TNFRSF8
691	PDE6D
692	ARL4C
693	MRPL35
694	SLC6A6
695	OBSCN
696	CRP
697	ESM1
698	TMEM184C
699	NAP1L5
700	HERC3
701	C2orf74
702	VARS
703	C1orf159
704	KCNIP4
705	MFSD8
706	C4orf29
707	LOC100287216
708	MYEOV2
709	AGER
710	UBXN10
711	NQO2
712	ZBTB22
713	TBX15
714	MAST2
715	SPRED2
716	ATAD3A
717	UNC5CL
718	C6orf204
719	LYRM4
720	TFAP2A
721	MUC21
722	OR2H2
723	CXCL1
724	MOBKL3
725	PTPRG
726	ZMYND10
727	ZNRD1
728	APBB2
729	BANK1
730	RYR2
731	FAM46B
732	CACNB4
733	CSPG5
734	C1orf123
735	MAEA
736	C2orf61
737	GUSBL2
738	MMACHC
739	CCDC163P
740	WDR33
741	SST
742	FARS2
743	ASAP2
744	ZBTB12
745	GDNF
746	RRAGC
747	LHFPL4
748	ADCY3
749	MXD3
750	MACF1
751	RBM24
752	GPC1
753	F5
754	HOXD13
755	EIF1B
756	PAX8
757	LOC440839
758	ABCA4
759	PEX10
760	FAM59B
761	C6orf120
762	EDEM3
763	MXRA8
764	CROCC
765	ACTL8
766	DYSF
767	SH3BP5
768	ZFYVE28
769	EPHA3
770	PHLDA3
771	IRS1
772	UBQLN4
773	LAP3
774	PADI3
775	MRPL33
776	MYCN
777	RASGEF1B
778	DOM3Z
779	STK19
780	UBE2Q1
781	LOC154449
782	SKIV2L2
783	DHX29
784	MAP1D
785	SLC35B3
786	KIAA0319
787	CPEB2
788	PSMB8
789	PDE11A
790	FBXO44
791	FBXO2
792	PRKCE
793	SRM
794	GJA4
795	NR5A2
796	BAT5
797	ANKRD39
798	SEMA5A
799	LOC100302652
800	GPR75
801	LMBRD2
802	SKP2
803	QDPR
804	NKX2-5
805	FAM84A
806	CDC42SE1
807	MLLT11
808	SGEF
809	FAM131A
810	UCN
811	C1orf177
812	KIAA0907
813	C1orf25
814	C1orf26
815	TJAP1
816	PROM2
817	GNL3
818	SNORD19
819	ECEL1
820	SORBS2
821	AMOTL2
822	SYDE2
823	CCR1
824	WNT9A
825	PNLDC1
826	NDUFS4
827	ZNF593
828	SLC39A7
829	RXRB
830	FABP1
831	NPPA
832	GBP5
833	BASP1
834	LOC285696
835	HMGA1
836	HMGCR
837	SMOC2
838	COMMD2
839	CHD5
840	TNFAIP8
841	GNG4
842	TLX2
843	TPD52L1
844	NEU1
845	PLK4
846	PCDHGC5
847	PCDHGC4
848	GPSM3
849	PTPRF
850	FAM19A4
851	PHF10
852	TNXA
853	BDH1
854	KCNAB2
855	EN1
856	ITGA9
857	UBD
858	GGPS1
859	ARID4B
860	NKTR
861	PLCH2
862	C1D
863	FLJ39609
864	KIAA0141
865	ITM2C
866	N4BP3
867	NEURL3
868	SPDYA
869	NAALADL2
870	GPR78
871	SKIV2L
872	HTRA3
873	LOC340094
874	MAGI1
875	ODZ2
876	ZNF323
877	MIB2
878	AOX1
879	SLC6A1
880	AFAP1
881	LOC84740
882	LOC348926
883	TRNT1
884	ADD1
885	C1orf210
886	FAP
887	ARHGEF4
888	WNT6
889	DHDDS
890	HMGN2
891	ADCY5
892	LGR6
893	NCRNA00164
894	MIR663B
895	NEURL1B
896	RUVBL1
897	GSTA1
898	ZNF148
899	PLEKHA6
900	PFDN6
901	ARPC5
902	RGL1
903	SQSTM1
904	KCNG3
905	VDAC1
906	GPR149
907	TRIM27
908	METTL13
909	ACOT11
910	MPL
911	GPD2
912	PRR3
913	GNL1
914	MUTED
915	UNC93A
916	THBS4
917	PCDHA1
918	HHATL
919	INO80B
920	DOK3
921	IP6K2
922	FGFR4
923	LRIG1
924	WDR52
925	HIBCH
926	BACH2
927	IHH
928	ANKH
929	ATAD3C
930	NSD1
931	KIF1B
932	EXOC3
933	TMEM79
934	MAP7
935	LRRC8B
936	NKAPL
937	SNORD76
938	SNORD74
939	SNORD75
940	GAS5
941	ZBTB37
942	QPCT
943	BRD2
944	ARHGEF19
945	TRIM59
946	ANKMY1
947	NEU4
948	THAP3
949	DNAJC11
950	SDCCAG8
951	NCEH1
952	CABC1
953	SEMA4C
954	MALL
955	TRIM26
956	C1orf106
957	SMARCAL1
958	ITGA2
959	PIGG
960	PPP1R1C
961	SASH1
962	MSH5
963	PIK3C2B
964	SYTL3
965	MUC4
966	ORC3L
967	RARS2
968	HS1BP3
969	MFAP3
970	FAM114A2
971	KCNK3
972	C1orf101
973	UQCRC1
974	LNPEP
975	B3GALT4
976	ZFYVE16
977	C6orf10
978	NAF1
979	RNF220
980	IGSF9
981	GUCY1B3
982	AQP12A
983	MST1P9
984	KIAA0226
985	CASR
986	GRK6
987	MIR375
988	MIR568
989	CCDC109B
990	SLC6A7
991	HTT
992	TAS1R2
993	RPL22
994	TNF
995	LNX1
996	METAP1
997	SHROOM3
998	CLEC3B
999	P4HTM
1000	GPR61
1001	TMCC2
1002	ESPN
1003	LOC152217
1004	NCBP2
1005	ARL9
1006	TRIM39
1007	SPCS3
1008	C2orf77
1009	PHOSPHO2
1010	KLHL23
1011	C6orf25
1012	SNHG8
1013	SNORA24
1014	C3orf30
1015	IGSF11
1016	THAP4
1017	LOC344595
1018	C6orf186
1019	SNORD95
1020	GNB2L1
1021	PLA2G2A
1022	ZNF354C
1023	FLT4
1024	VWA1
1025	MSL3L2
1026	CUTA
1027	CDC42SE2
1028	STK40
1029	CYP26B1
1030	TMEM108
1031	TBL1XR1
1032	KHDC1
1033	KIAA1026
1034	TMEM30A
1035	UBR3
1036	FLJ39653
1037	TAPT1
1038	CANX
1039	CPEB4
1040	GHRLOS
1041	GHRL
1042	ALX3
1043	KLF3
1044	KCNK5
1045	RNF207
1046	FGFR1OP
1047	H2AFY
1048	ARSJ
1049	WWC1
1050	PDCD2
1051	TMCO1
1052	PKP4
1053	CHRD
1054	HIST1H3C
1055	LHX4
1056	POTEF
1057	MGC2889
1058	HRASLS
1059	UTP3
1060	SYNC
1061	ATP5I
1062	PRSS42
1063	LY6G5C
1064	ZAP70
1065	DBN1
1066	EPHA4
1067	C5orf47
1068	COL9A2
1069	PSMB9
1070	TAP1
1071	TMEM43
1072	STL
1073	TMEM155
1074	LOC100192379
1075	SNRNP27
1076	FAM159A
1077	ADAT2
1078	C3orf27
1079	PACRGL
1080	C3orf67
1081	SLC25A31
1082	SRRM1
1083	SLFNL1
1084	WDR17
1085	MST1P2
1086	TBR1
1087	MMADHC
1088	MAML3
1089	TBCE
1090	GPR153
1091	PPP1R7
1092	HTR1E
1093	TYW3
1094	CRYZ
1095	C6orf227
1096	AJAP1
1097	ACAA1
1098	MYD88
1099	CXXC5
1100	NDUFA10
1101	IL4
1102	IL28RA
1103	EPHA6
1104	FANCD2
1105	CIDECP
1106	DGKD
1107	ALG14
1108	LEFTY1
1109	IL20RA
1110	ZFAND3
1111	ZNF354A
1112	EGFLAM
1113	KIAA0562
1114	GLB1
1115	SKP1
1116	REV3L
1117	SNX4
1118	ZCCHC17
1119	SNRNP40
1120	LIN54
1121	LMCD1
1122	SNRPE
1123	FBXO5
1124	C2orf88
1125	SYN2
1126	SERPINB9
1127	POLR3GL
1128	IER3
1129	ABHD14B
1130	ABHD14A
1131	HIST3H2BB
1132	HIST3H2A
1133	IRF2BP2
1134	SLIT3
1135	IVNS1ABP
1136	BPHL
1137	NUP210L
1138	PRSS35
1139	GUK1
1140	MAST4
1141	SERINC2
1142	LMAN2
1143	MARCKS
1144	PDE4DIP
1145	SMPDL3B
1146	RPL34
1147	LOC285456
1148	TRIM52
1149	IRF6
1150	RUNX3
1151	PPP2R2C
1152	SEMA5B
1153	PHF1
1154	MCF2L2
1155	BSN
1156	PRKCD
1157	HLA-G
1158	APITD1
1159	SLC22A15
1160	CNTNAP5
1161	ZNF669
1162	PTPLB
1163	GSTM5
1164	ZNF76
1165	DNTTIP2
1166	VPS52
1167	RPS18
1168	HIST1H3E
1169	NPY2R
1170	OLFM3
1171	HTRA2
1172	AUP1
1173	SIAH2
1174	CNTN2
1175	C2
1176	ID2
1177	PDE4D
1178	C1orf111
1179	INTS3
1180	C1orf35
1181	ULBP1
1182	ALS2
1183	ENO1
1184	AGBL5
1185	KIAA1949
1186	C4orf44
1187	EYA4
1188	ACTN2
1189	PCSK1
1190	HIST1H2AL
1191	UNC5A
1192	NMU
1193	FDPS
1194	NPR1
1195	DVL1
1196	ILKAP
1197	HIST1H2BN
1198	HIST1H2AK
1199	NPAS2
1200	ZNF318
1201	TRIM46
1202	PI16
1203	RASAL2
1204	UBE2K
1205	LYRM7
1206	CR1L
1207	TNFRSF18
1208	TCHH
1209	UCP1
1210	NRBP1
1211	LOC100128071
1212	TSSK3
1213	SLC30A7
1214	EXTL2
1215	USP45
1216	PRKAR2A
1217	KIF21B
1218	OXTR
1219	IWS1
1220	RING1
1221	TBPL1
1222	MYLK
1223	RBM34
1224	PCBD2
1225	CRIP3
1226	CXCR7
1227	DHX36
1228	OTX1
1229	NOP14
1230	CATSPER4
1231	DEGS1
1232	FCN3
1233	STIM2
1234	PLS1
1235	PIK3CD
1236	MGC45800
1237	LEFTY2
1238	RNASEH1
1239	INTS7
1240	DTL
1241	LOC728855
1242	LOC728875
1243	ZFP57
1244	KLHL8
1245	IL22RA2
1246	SMPD4
1247	FAM128B
1248	C6orf27
1249	S100A16
1250	STAB1
1251	MXD1
1252	FAM54B
1253	LOC646471
1254	KLF15
1255	HAO2
1256	AQP12B
1257	ZBTB17
1258	GLRA1
1259	KIAA1383
1260	FEZF2
1261	TCP10L2
1262	GRPEL1
1263	PCDHA6
1264	PCDHA2
1265	PCDHA7
1266	PCDHA5
1267	PCDHA3
1268	PCDHA4
1269	DNAJC19
1270	MCHR2
1271	CENPQ
1272	MUT
1273	CEP72
1274	GNPAT
1275	C1orf131
1276	CASP8
1277	TPRA1
1278	NT5DC2
1279	CRYGD
1280	GJA8
1281	PTPRU
1282	LRRC33
1283	SCP2
1284	BCAR3
1285	HSP90AB1
1286	ALS2CR11
1287	MED8
1288	C1orf84
1289	CTDSPL
1290	MIR26A1
1291	PHIP
1292	SPEG
1293	TEC
1294	OCIAD1
1295	PDCD6
1296	UBE2J2
1297	HIST1H2AG
1298	HTR3E
1299	USP34
1300	C2orf28
1301	SLC5A6
1302	RANBP3L
1303	MYL5
1304	CCDC14
1305	TTK
1306	NUDT16P
1307	SCARNA22
1308	GRB14
1309	ITGA1
1310	PELO
1311	CACNA2D2
1312	CLPTM1L
1313	C5orf30
1314	SLITRK3
1315	FBXL2
1316	RGPD1
1317	TLR6
1318	CXCR6
1319	FYCO1
1320	FAM123C
1321	HIST1H2BK
1322	HIST1H4I
1323	KLHL3
1324	ECE1
1325	JUN
1326	NBLA00301
1327	RPP21
1328	MEIS1
1329	NDUFS6
1330	SLC30A1
1331	ATG7
1332	UGP2
1333	ELOVL5
1334	SCMH1
1335	AGXT2L1
1336	NUP155
1337	PMVK
1338	CTNNA2
1339	LRRTM1
1340	BIN1
1341	MLH1
1342	EPM2AIP1
1343	HACE1
1344	CRTAP
1345	DNALI1
1346	FBXL7
1347	METTL14
1348	ZBTB40
1349	CAP1
1350	ZSCAN12
1351	SPC25
1352	SDF4
1353	SP140L
1354	NMNAT1
1355	T
1356	FAM189B
1357	PRDM8
1358	MRPL55
1359	SPON2
1360	C1orf135
1361	HIST1H3A
1362	SLC30A9
1363	SDHAP3
1364	DTWD2
1365	LRRC2
1366	TCF7L1
1367	HAT1
1368	PGBD5
1369	CNR2
1370	EBF1
1371	CPE
1372	EIF2C1
1373	TMSB10
1374	ID3
1375	GSTA4
1376	C1orf70
1377	GPR128
1378	ELTD1
1379	CCR9
1380	C3orf43
1381	PTCHD2
1382	SCARB2
1383	DNAJC27
1384	USP39
1385	BAT2L2
1386	KCND3
1387	TIMP4
1388	ANO10
1389	DLGAP3
1390	MFSD10
1391	B4GALT2
1392	SMEK2
1393	UBE2CBP
1394	BCL11A
1395	BAT1
1396	CCNG1
1397	PSMD4
1398	PVRL4
1399	S1PR1
1400	TSTD1
1401	TNN
1402	FAM43A
1403	TTLL10
1404	WDR92
1405	PNO1
1406	TARDBP
1407	PFN2
1408	NGEF
1409	POU4F3
1410	PDHA2
1411	QSOX1
1412	HCG27
1413	S100A5
1414	PROC
1415	SRGAP3
1416	NAA15
1417	DHX15
1418	B3GNT5
1419	UFC1
1420	PCBP1
1421	AMD1
1422	SIRT5
1423	MTMR14
1424	IDUA
1425	LPIN1
1426	ZBTB48
1427	WDR47
1428	FIGLA
1429	PHOX2B
1430	CAMK4
1431	FAM126B
1432	TMEM198
1433	LOC389333
1434	ODZ3
1435	COL21A1
1436	TMEM167B
1437	GPBAR1
1438	DPYSL5
1439	PGBD1
1440	ROPN1B
1441	C1orf114
1442	OSCP1
1443	MAP3K2
1444	EEF1A1
1445	PAX7
1446	PRR7
1447	C6orf134
1448	POU3F2
1449	GAD1
1450	RGS2
1451	GRM2
1452	TAF8
1453	DCTD
1454	PTCH2
1455	TMEM131
1456	FOXJ3
1457	GPR160
1458	MMEL1
1459	DR1
1460	IAH1
1461	C4orf43
1462	FAM20B
1463	NCRNA00219
1464	SNORA13
1465	FAM184B
1466	C2orf50
1467	HSPA6
1468	GPX1
1469	MKI67IP
1470	GLB1L
1471	MED23
1472	MCM6
1473	MIR564
1474	TMEM42
1475	MEX3A
1476	CXCL14
1477	SYNPO
1478	AVPR1B
1479	2019-09-11
1480	THBS2
1481	BOLA1
1482	ELOVL4
1483	HIST1H2AI
1484	HIST1H2BL
1485	RNF187
1486	C4B
1487	C4A
1488	MATN1
1489	TUBB2B
1490	LOC729678
1491	RRM2
1492	THPO
1493	EFNA3
1494	OR10C1
1495	ZNF518B
1496	KIAA1841
1497	S100A2
1498	B4GALT3
1499	ANKRD55
1500	ULK4
1501	LOC646498
1502	ATXN1
1503	PACSIN1
1504	HLA-DRA
1505	CTDSP1
1506	PPIL1
1507	FHAD1
1508	FTSJD2
1509	SLC22A23
1510	EEFSEC
1511	APOM
1512	NUDT3
1513	MIR921
1514	FAM78B
1515	C6orf129
1516	TCP1
1517	MRPL18
1518	ESR1
1519	SLC2A9
1520	NEDD9
1521	VPS13D
1522	ZNF354B
1523	C6orf124
1524	PDE10A
1525	PRDM13
1526	SPRY1
1527	LOC100132111
1528	C2CD4D
1529	C4orf50
1530	DIAPH1
1531	INSRR
1532	FBLN2
1533	TRIM42
1534	RPS3A
1535	MGAT1
1536	USP21
1537	WNT10A
1538	KCTD18
1539	FGGY
1540	YIPF5
1541	KCTD16
1542	LEKR1
1543	BVES
1544	AMPD2
1545	PFN3
1546	GUSBL1
1547	FAM5C
1548	TESK2
1549	ALAS1
1550	TATDN2
1551	TMEM174
1552	ACVR1C
1553	DYNC1LI1
1554	NCK2
1555	RPA2
1556	FBLIM1
1557	EXOC1
1558	NR1I2
1559	GPR25
1560	LRPAP1
1561	TMEM170B
1562	TSPAN5
1563	GRRP1
1564	TNS1
1565	SAMD11
1566	ZNF366
1567	CDH10
1568	SLIT2
1569	CNIH3
1570	HIVEP1
1571	TNFRSF21
1572	LCLAT1
1573	PSRC1
1574	ING5
1575	RPL9
1576	LIAS
1577	LRRC8D
1578	SFRS3
1579	CDC25C
1580	SYCP1
1581	LEMD2
1582	SGTB
1583	NLN
1584	EPB41L4A
1585	DEPDC1B
1586	CAMK2A
1587	HSPA1A
1588	HSPA1L
1589	KDM4A
1590	KCNIP1
1591	ZNF662
1592	DPYD
1593	CYS1
1594	KCNS3
1595	MST1R
1596	GPR37L1
1597	GALNT14
1598	C3orf55
1599	MIXL1
1600	EMX1
1601	SHISA3
1602	DPCR1
1603	ADAR
1604	MOBKL1B
1605	NEU2
1606	LOC401052
1607	ECM1
1608	TRIM11
1609	HLA-H
1610	RNASET2
1611	TTBK1
1612	SFRS4
1613	MICB
1614	DUSP1
1615	USO1
1616	TMEM222
1617	RSPH3
1618	HOXD1
1619	ARHGEF3
1620	CCDC50
1621	UTS2D
1622	CAMK1
1623	WDSUB1
1624	STRADB
1625	TRAK2
1626	SCYL3
1627	CYP4V2
1628	ACTR3
1629	SNAP91
1630	KLHL30
1631	STX6
1632	C3orf31
1633	HEATR1
1634	SLC22A1
1635	PRDM2
1636	BCL10
1637	NSUN4
1638	SSU72
1639	PRELP
1640	GNAI2
1641	KCNF1
1642	ANKRD17
1643	SFT2D2
1644	ILDR2
1645	RSAD2
1646	RELL2
1647	HDAC3
1648	CORIN
1649	ART3
1650	MORC1
1651	LOC339524
1652	WDR82
1653	ALDH7A1
1654	ATP6V1B1
1655	TIPARP
1656	LOC100287227
1657	STAMBP
1658	MIR548G
1659	COL8A1
1660	MIR760
1661	CLK2
1662	TMEM82
1663	RNPEPL1
1664	WDR55
1665	SP100
1666	LRRC8C
1667	NIF3L1
1668	PPIL3
1669	RPIA
1670	UGT1A10
1671	UGT1A6
1672	UGT1A8
1673	UGT1A4
1674	UGT1A3
1675	UGT1A9
1676	UGT1A7
1677	UGT1A5
1678	PPP2R2B
1679	DCAF8
1680	MFSD7
1681	CLDND1
1682	FLJ42875
1683	ANKRD44
1684	C6orf226
1685	PEX19
1686	GTF3C2
1687	LOC400794
1688	LRRC1
1689	C2orf65
1690	GJA1
1691	ZNF643
1692	S100A4
1693	PSMG4
1694	VWA5B2
1695	MIR1224
1696	HIST1H4K
1697	PBXIP1
1698	HIST1H2BJ
1699	TGFBI
1700	MGC16025
1701	CDCP1
1702	RAB3GAP1
1703	RTN4IP1
1704	QRSL1
1705	LRRN1
1706	ZC3H12A
1707	EFEMP1
1708	FGF5
1709	PRPF38B
1710	HOXD4
1711	MIR10B
1712	ZNF608
1713	KAAG1
1714	DCDC2
1715	MFSD2B
1716	FYTTD1
1717	KANK4
1718	FGR
1719	ACTRT2
1720	NVL
1721	RBM5
1722	C5orf56
1723	RHO
1724	STOX2
1725	MTRF1L
1726	LOC100128003
1727	MIR886
1728	AKAP12
1729	HMP19
1730	SRD5A2
1731	SEMA3G
1732	MIR138-1
1733	RQCD1
1734	USP37
1735	CNOT6
1736	AGMAT
1737	CFLAR
1738	PADI2
1739	BRP44L
1740	SDHB
1741	MAN1C1
1742	THADA
1743	DZIP3
1744	KIAA1524
1745	MREG
1746	ZBTB9
1747	SENP2
1748	BTNL2
1749	JAGN1
1750	TBCK
1751	PSMD1
1752	TMEM33
1753	LOC400752
1754	CPLX2
1755	ERBB2IP
1756	MOBKL2C
1757	DARS
1758	WDR36
1759	IP6K1
1760	ZNF322A
1761	HRNR
1762	DHX30
1763	C1orf38
1764	SOCS5
1765	SLC44A4
1766	HLA-L
1767	TRIM7
1768	PLXNA2
1769	C2orf44
1770	DPPA2
1771	HOOK1
1772	PNRC1
1773	MAT2A
1774	CHPF
1775	CYFIP2
1776	SF3A3
1777	ZNF721
1778	ABCA11P
1779	TRAF3IP1
1780	ANKRD28
1781	SLC30A5
1782	KIAA1143
1783	HELQ
1784	MRPS18C
1785	PPM1K
1786	NEIL3
1787	ZNF292
1788	HLA-E
1789	C1orf50
1790	RESP18
1791	ACOT7
1792	ELOVL6
1793	C1orf93
1794	SNX9
1795	TACR1
1796	TTC15
1797	PCDHA9
1798	PCDHA11
1799	PCDHA10
1800	PCDHA8
1801	ATAD3B
1802	ING2
1803	ST3GAL3
1804	ATP6V1G2
1805	NFKBIL1
1806	HNRNPD
1807	CD38
1808	KATNA1
1809	PARD3B
1810	TRAM2
1811	PARK7
1812	RPP40
1813	COL9A1
