# Supplementary material for: Distinguishing Glioblastoma Subtypes by Methylation Signatures
Source: Front Genet. 2020 Nov 24;11:604336. doi: 10.3389/fgene.2020.604336 (PMC7732602; doi:10.3389/fgene.2020.604336)
Supplement: Supplementary Table 4 — Enrichment analysis results on 1813 coding genes. [file Table_4.XLSX]

## Sheet: enrich.GO.BP
gene.set	fdr	p	odds	expected	numW	numB	numDrawn	numWdrawn	Wdrawn
GO:0007399_nervous system development	5.57294e-16	3.52807e-20	1.94732	184.153	2243	15138	1427	303	ADORA1|ADRA2C|AGER|ALK|BIN1|ANK2|APBB2|RHOA|ATP2B4|BCL6|PRDM1|BMP6|DDR1|CAMK2A|RUNX3|TNFRSF8|SCARB2|CRMP1|NKX2-5|CTNNA2|CTNND2|DGKG|DBN1|DHFR|DNMT3A|DOK1|DVL1|S1PR1|EFNA3|EFNA5|CELSR3|CELSR2|EMX1|EN1|EPHA3|EPHA4|EPHA8|EPHB2|FANCD2|FGF5|FGF12|GABRB1|GABRB2|GAK|GBX2|GDNF|GJA1|GLI2|GPC1|CXCL1|HNRNPD|TLX2|HOXD1|HOXD3|HOXD9|HOXD10|HES1|HSPG2|HTR6|ID2|ID3|IHH|INHA|ISL1|ITGA1|JARID2|JUN|KCNK3|KIF5C|LTA|…
GO:0007275_multicellular organism development	8.77486e-11	1.66653e-14	1.5543	426.105	5190	12191	1427	555	ACTA1|ACTN2|ADAR|ADD1|ADORA1|PARP1|ADRA1B|ADRA2C|AGER|AHSG|ALK|ALX3|BIN1|ANK2|APBB2|RHOA|ATP2B4|ATP6V1B1|ATR|BCL6|BGLAP|PRDM1|BMP6|DDR1|CAMK4|CAMK2A|CASP8|CASR|RUNX3|CD8A|CD80|TNFRSF8|SCARB2|CDSN|CDX1|AP2M1|CCR1|COL6A3|COL8A1|COL9A1|COL9A2|COL11A2|CPE|CRMP1|CRYGD|NKX2-5|CTLA4|CTNNA2|CTNND2|DGKG|DBN1|DHFR|DNMT3A|DOK1|DSP|DUSP1|DVL1|EBF1|ECE1|ECM1|S1PR1|PHC2|EFNA3|EFNA5|CELSR3|CELSR2|EMX1|EN1|SLC29…
GO:0048731_system development	8.77486e-11	1.34089e-14	1.57478	379.471	4622	12759	1427	505	ACTA1|ACTN2|ADAR|ADD1|ADORA1|PARP1|ADRA2C|AGER|AHSG|ALK|ALX3|BIN1|ANK2|APBB2|RHOA|ATP2B4|ATP6V1B1|BCL6|BGLAP|PRDM1|BMP6|DDR1|CAMK4|CAMK2A|CASP8|CASR|RUNX3|CD8A|CD80|TNFRSF8|SCARB2|CDSN|CDX1|AP2M1|CCR1|COL6A3|COL8A1|COL9A1|COL9A2|COL11A2|CPE|CRMP1|CRYGD|NKX2-5|CTLA4|CTNNA2|CTNND2|DGKG|DBN1|DHFR|DNMT3A|DOK1|DSP|DVL1|ECE1|ECM1|S1PR1|EFNA3|EFNA5|CELSR3|CELSR2|EMX1|EN1|SLC29A1|EPHA3|EPHA4|EPHA8|EPHB2|…
GO:0048856_anatomical structure development	1.38473e-10	3.50653e-14	1.53479	465.185	5666	11715	1427	595	ACTA1|ACTN2|ADAR|ADD1|ADORA1|PARP1|ADRA1B|ADRA2C|AGER|AHSG|ALK|ALX3|BIN1|ANK2|APBB2|RHOA|ATP2B4|ATP6V1B1|ATR|BCL6|BGLAP|PRDM1|BMP6|DDR1|CAMK4|CAMK2A|CASP8|CASR|RUNX3|CD8A|CD80|TNFRSF8|SCARB2|CDSN|CDX1|AP2M1|CCR1|COL6A3|COL8A1|COL9A1|COL9A2|COL11A2|CPE|CRMP1|CRYGD|NKX2-5|CTLA4|CTNNA2|CTNND2|DGKG|DBN1|DHFR|DIAPH1|DNMT3A|DOK1|DSP|DTYMK|DUSP1|DVL1|EBF1|ECE1|ECM1|S1PR1|PHC2|EFNA3|EFNA5|CELSR3|CELSR2|E…
GO:0007267_cell-cell signaling	2.27665e-10	7.20641e-14	1.86774	129.966	1583	15798	1427	213	ADCY5|ADORA1|ADRA1B|ADRA2C|AGER|ANK2|RHOA|BMP6|CACNA1D|CACNB4|CAMK2A|CASR|CD80|CD38|AP2M1|CCR1|CNR2|CPE|NKX2-5|CTNND2|DBN1|DVL1|EFNA3|EFNA5|CELSR3|CELSR2|SLC29A1|EPHA4|EPHB2|ESR1|F2R|FGF5|FGF12|FGFR3|GABRB2|GABRD|GAD1|GDNF|GJA1|GJA4|GJA8|GLI2|GLRA1|GNAI2|GPR27|GRK6|GRM2|GRM4|GRM6|HMGCR|HES1|HTR1E|HTR6|IGFBP2|IHH|IL1RN|INHA|INHBB|IRS1|ISL1|ITPR3|KCNJ3|KCNK3|KCNS3|KISS1|LNPEP|LTA|MARCKS|MCC|NKX6-1|…
GO:0032502_developmental process	6.12036e-10	2.32478e-13	1.50602	500.735	6099	11282	1427	628	ACTA1|ACTN2|ADAR|ADD1|ADORA1|PARP1|ADRA1B|ADRA2C|AGER|AHSG|ALK|ALX3|BIN1|ANK2|APBB2|RHOA|ATP2B4|ATP6V1B1|ATR|BCL6|BGLAP|PRDM1|BMP6|DDR1|CAMK4|CAMK2A|CANX|CASP8|CASR|RUNX3|CD8A|CD80|TNFRSF8|SCARB2|CDSN|CDX1|AP2M1|CLIC1|CCR1|COL6A3|COL8A1|COL9A1|COL9A2|COL11A2|CPE|CRMP1|CRP|CRYGD|NKX2-5|CTLA4|CTNNA2|CTNND2|DGKG|DBN1|DHFR|DIAPH1|DNMT3A|DOK1|DSP|DTYMK|DUSP1|DVL1|EBF1|ECE1|ECM1|S1PR1|PHC2|EFNA3|EFNA5|…
GO:0030182_neuron differentiation	1.33525e-09	5.91716e-13	1.92991	103.447	1260	16121	1427	176	ADRA2C|AGER|ALK|BIN1|APBB2|RHOA|BCL6|PRDM1|BMP6|DDR1|CAMK2A|RUNX3|TNFRSF8|SCARB2|CRMP1|NKX2-5|CTNNA2|CTNND2|DGKG|DBN1|DHFR|DNMT3A|DOK1|DVL1|S1PR1|EFNA3|EFNA5|CELSR3|CELSR2|EMX1|EN1|EPHA3|EPHA4|EPHA8|EPHB2|GABRB1|GABRB2|GAK|GBX2|GDNF|GJA1|GLI2|GPC1|TLX2|HOXD1|HOXD3|HOXD9|HOXD10|HES1|ID2|ID3|IHH|ISL1|ITGA1|JUN|KIF5C|MEIS1|MYCN|NEUROG1|NKX6-1|NTRK1|NR4A2|PAX7|PBX1|PIK3CD|PITX2|PLXNA2|POU3F2|POU4F3|P…
GO:0022008_neurogenesis	4.93843e-09	2.5011e-12	1.8268	121.756	1483	15898	1427	197	ADRA2C|AGER|ALK|BIN1|APBB2|RHOA|BCL6|PRDM1|BMP6|DDR1|CAMK2A|RUNX3|TNFRSF8|SCARB2|CRMP1|NKX2-5|CTNNA2|CTNND2|DGKG|DBN1|DHFR|DNMT3A|DOK1|DVL1|S1PR1|EFNA3|EFNA5|CELSR3|CELSR2|EMX1|EN1|EPHA3|EPHA4|EPHA8|EPHB2|FGF5|GABRB1|GABRB2|GAK|GBX2|GDNF|GJA1|GLI2|GPC1|TLX2|HOXD1|HOXD3|HOXD9|HOXD10|HES1|ID2|ID3|IHH|ISL1|ITGA1|JUN|KIF5C|LTA|MEIS1|MYCN|NEUROG1|NKX6-1|NTRK1|NR4A2|PAX7|PBX1|PIK3CD|PITX2|PLXNA2|POU3F2…
GO:0048699_generation of neurons	5.2667e-09	3.00078e-12	1.85083	114.038	1389	15992	1427	187	ADRA2C|AGER|ALK|BIN1|APBB2|RHOA|BCL6|PRDM1|BMP6|DDR1|CAMK2A|RUNX3|TNFRSF8|SCARB2|CRMP1|NKX2-5|CTNNA2|CTNND2|DGKG|DBN1|DHFR|DNMT3A|DOK1|DVL1|S1PR1|EFNA3|EFNA5|CELSR3|CELSR2|EMX1|EN1|EPHA3|EPHA4|EPHA8|EPHB2|GABRB1|GABRB2|GAK|GBX2|GDNF|GJA1|GLI2|GPC1|TLX2|HOXD1|HOXD3|HOXD9|HOXD10|HES1|ID2|ID3|IHH|ISL1|ITGA1|JUN|KIF5C|LTA|MEIS1|MYCN|NEUROG1|NKX6-1|NTRK1|NR4A2|PAX7|PBX1|PIK3CD|PITX2|PLXNA2|POU3F2|POU4…
GO:0007156_homophilic cell adhesion via plasma membrane adhesion molecules	2.38255e-08	1.50833e-11	4.0389	12.8899	157	17224	1427	41	CDH10|CDH12|CDH18|CELSR3|CELSR2|PCDHGC3|PCDHGB4|PCDHGA8|PCDHA9|PCDHGA12|PCDH12|PCDHGC5|PCDHGC4|PCDHGB7|PCDHGB6|PCDHGB5|PCDHGB3|PCDHGB2|PCDHGB1|PCDHGA11|PCDHGA10|PCDHGA9|PCDHGA7|PCDHGA6|PCDHGA5|PCDHGA4|PCDHGA3|PCDHGA2|PCDHGA1|PCDHA11|PCDHA10|PCDHA8|PCDHA7|PCDHA6|PCDHA5|PCDHA4|PCDHA3|PCDHA2|PCDHA1|IGSF9|PCDH10
GO:0009653_anatomical structure morphogenesis	2.6149e-08	1.82096e-11	1.61461	205.499	2503	14878	1427	294	ACTA1|ACTN2|ADD1|ALX3|ANK2|APBB2|RHOA|ATP6V1B1|BCL6|BGLAP|PRDM1|BMP6|DDR1|CAMK2A|CASR|TNFRSF8|CDSN|CDX1|AP2M1|COL8A1|COL9A1|CPE|CRMP1|NKX2-5|CTNNA2|CTNND2|DIAPH1|DOK1|DSP|DUSP1|DVL1|ECE1|ECM1|S1PR1|EFNA3|EFNA5|CELSR3|CELSR2|EMX1|EN1|EPB41|EPHA4|EPHA8|EPHB2|EYA4|ESR1|F2R|FANCD2|FAP|EFEMP1|FGFR3|FGR|FHL2|FOXE3|FOXD2|FLNB|FLT4|NR5A2|GBX2|GDNF|GJA1|GLI2|GPC1|GPX1|TLX2|HOXD3|HOXD4|HOXD8|HOXD9|HOXD10|H…
GO:0051239_regulation of multicellular organismal process	2.5127e-07	1.90886e-10	1.54438	235.138	2864	14517	1427	323	ADD1|ADORA1|ADORA3|PARP1|ADRA1B|ADRA2C|AGER|AHSG|BIN1|ANK2|RHOA|ATP2B4|AVPR1B|BCL6|BGLAP|PRDM1|BMP6|CACNA1D|CACNB4|CAMK4|CASP8|CASR|CD80|TNFRSF8|SCARB2|CD38|CDSN|CDX1|AP2M1|CLIC1|CCR1|CRMP1|CRP|NKX2-5|CTLA4|DBN1|DSP|DVL1|ECE1|ECM1|S1PR1|EFNA3|EFNA5|CELSR3|CELSR2|EMX1|ENO1|EPHA3|EPHA4|EPHB2|ESR1|F2R|F12|FANCD2|FAP|EFEMP1|FGF12|FGR|FOXE3|FLT4|GAK|GDNF|GJA1|GLI2|GLRA1|GPC1|GPX1|HLA-DOA|HLA-E|HLA-G|H…
GO:0048666_neuron development	6.61032e-07	5.44025e-10	1.8711	82.8401	1009	16372	1427	139	AGER|ALK|APBB2|RHOA|PRDM1|DDR1|CAMK2A|RUNX3|TNFRSF8|SCARB2|CRMP1|CTNNA2|CTNND2|DGKG|DBN1|DHFR|DOK1|DVL1|EFNA3|EFNA5|CELSR3|CELSR2|EMX1|EN1|EPHA3|EPHA4|EPHA8|EPHB2|GABRB1|GABRB2|GAK|GBX2|GDNF|GJA1|GLI2|GPC1|TLX2|HOXD9|HOXD10|HES1|IHH|ISL1|ITGA1|JUN|KIF5C|NKX6-1|NTRK1|NR4A2|PIK3CD|PLXNA2|POU3F2|POU4F3|PRKCZ|PTPRF|PTPRG|PTPRK|SEMA3F|SFRP2|SGK1|SIAH2|SKI|SLC1A3|SLIT3|SPOCK1|SPP1|SPTBN1|CNTN2|TBCE|TGF…
GO:0048468_cell development	9.02557e-07	7.99936e-10	1.6157	161.739	1970	15411	1427	235	ACTA1|ACTN2|ADD1|ADRA2C|AGER|ALK|BIN1|ANK2|APBB2|RHOA|BCL6|BGLAP|PRDM1|BMP6|DDR1|CAMK2A|RUNX3|TNFRSF8|SCARB2|CDSN|CRMP1|NKX2-5|CTNNA2|CTNND2|DGKG|DBN1|DHFR|DOK1|DVL1|EFNA3|EFNA5|CELSR3|CELSR2|EMX1|EN1|EPHA3|EPHA4|EPHA8|EPHB2|ESR1|FHL2|FOXE3|FLNB|GABRB1|GABRB2|GAK|GBX2|GDNF|GJA1|GLI2|GPC1|GPX1|TLX2|HOXD3|HOXD9|HOXD10|AGFG1|HES1|ID2|IHH|ING2|INHA|INHBB|IRF6|ISL1|ITGA1|JUN|KIF5C|LTA|MATN1|MEIS1|MLH1…
GO:0032501_multicellular organismal process	1.00975e-05	9.58868e-09	1.36752	604.511	7363	10018	1427	706	ABCA4|ACTA1|ACTN2|ADAR|ADCY3|ADCY5|ADD1|ADORA1|ADORA3|PARP1|ADRA1B|ADRA2C|AGER|AHSG|ALK|ALX3|AMPD2|BIN1|ANK2|APBB2|RHOA|ATP2B4|ALDH7A1|ATP6V1B1|ATR|AVPR1B|BCL6|BGLAP|PRDM1|BMP6|CACNA1D|DDR1|CACNB4|CAMK4|CAMK2A|CASP8|CASR|RUNX3|CD8A|CD80|TNFRSF8|SCARB2|CD38|CDC25C|CDSN|CDX1|AP2M1|CLIC1|CCR1|CNGA3|CNR2|COL6A3|COL8A1|COL9A1|COL9A2|COL11A2|COL16A1|CPE|CRMP1|CRP|CRYGD|CRYZ|CSRP1|NKX2-5|CTLA4|CTNNA2|CT…
GO:0048518_positive regulation of biological process	1.48505e-05	1.59274e-08	1.37559	466.335	5680	11701	1427	562	ACTA1|ACTN2|ADAR|ADCY3|ADCY5|ADD1|ADORA1|ADORA3|PARP1|ADRA1B|ADRA2C|AGER|AHSG|ALK|BIN1|ANK2|APBB2|RHOA|ATP2B4|ATR|AVPR1B|BCL6|PRDM1|BMP6|C2|C4A|C4B|CACNA1D|CAMK4|CAMK2A|CASP8|CASR|RUNX3|CCND3|CD8A|CD80|TNFRSF8|SCARB2|CD38|CDC25C|CDX1|CKS1B|CLIC1|CCR1|COL8A1|COL16A1|ATF6B|CRP|NKX2-5|CTLA4|CTNNA2|DGKQ|DAXX|DHFR|DIAPH1|DNMT3A|DOK1|DUSP1|DVL1|ECE1|ECM1|S1PR1|EFNA3|EFNA5|EN1|ENO1|EPB41|EPHA3|EPHA4|EPH…
GO:0052696_flavonoid glucuronidation	1.48505e-05	1.69225e-08	89.9394	0.73891	9	17372	1427	8	UGT1A10|UGT1A8|UGT1A7|UGT1A6|UGT1A5|UGT1A9|UGT1A4|UGT1A3
GO:0052697_xenobiotic glucuronidation	1.48505e-05	1.69225e-08	89.9394	0.73891	9	17372	1427	8	UGT1A10|UGT1A8|UGT1A7|UGT1A6|UGT1A5|UGT1A9|UGT1A4|UGT1A3
GO:0120039_plasma membrane bounded cell projection morphogenesis	1.68838e-05	2.03085e-08	2.01801	49.6712	605	16776	1427	90	APBB2|RHOA|DDR1|CAMK2A|TNFRSF8|CRMP1|CTNNA2|CTNND2|DOK1|DVL1|EFNA3|EFNA5|CELSR3|CELSR2|EMX1|EPHA4|EPHA8|EPHB2|GBX2|GDNF|GJA1|GLI2|GPC1|TLX2|ISL1|ITGA1|KIF5C|NKX6-1|NTRK1|NR4A2|PIK3CD|PLXNA2|POU3F2|POU4F3|PRKCZ|RREB1|SEMA3F|SGK1|SIAH2|SLIT3|SPP1|SPTBN1|CNTN2|TBCE|NR2E1|UGT8|WNT5A|CXCR4|KLF7|NRP2|SYNGAP1|PHOX2B|SEMA5A|SLIT2|NRXN1|RAPGEF2|CUL7|ZEB2|SPON2|STK25|PDPN|TBR1|SLITRK3|NLGN1|NFASC|OBSL1|MAC…
GO:0032990_cell part morphogenesis	2.01107e-05	2.75674e-08	1.98614	51.4774	627	16754	1427	92	APBB2|RHOA|DDR1|CAMK2A|TNFRSF8|CRMP1|CTNNA2|CTNND2|DOK1|DVL1|EFNA3|EFNA5|CELSR3|CELSR2|EMX1|EPHA4|EPHA8|EPHB2|GBX2|GDNF|GJA1|GLI2|GPC1|TLX2|ISL1|ITGA1|KIF5C|NDUFS6|NKX6-1|NTRK1|NR4A2|PIK3CD|PLXNA2|POU3F2|POU4F3|PRKCZ|RREB1|SEMA3F|SGK1|SIAH2|SLIT3|SPP1|SPTBN1|CNTN2|TBCE|NR2E1|UGT8|WNT5A|CXCR4|KLF7|NRP2|SYNGAP1|PHOX2B|SEMA5A|SLIT2|NRXN1|RAPGEF2|CUL7|ZEB2|SPON2|STK25|PDPN|TBR1|SLITRK3|NLGN1|NFASC|OB…
GO:0048812_neuron projection morphogenesis	2.01107e-05	2.80093e-08	2.01879	48.5218	591	16790	1427	88	APBB2|RHOA|DDR1|CAMK2A|TNFRSF8|CRMP1|CTNNA2|CTNND2|DOK1|DVL1|EFNA3|EFNA5|CELSR3|CELSR2|EMX1|EPHA4|EPHA8|EPHB2|GBX2|GDNF|GJA1|GLI2|GPC1|TLX2|ISL1|ITGA1|KIF5C|NKX6-1|NTRK1|NR4A2|PIK3CD|PLXNA2|POU3F2|POU4F3|PRKCZ|SEMA3F|SGK1|SIAH2|SLIT3|SPP1|SPTBN1|CNTN2|TBCE|NR2E1|UGT8|WNT5A|CXCR4|KLF7|NRP2|SYNGAP1|PHOX2B|SEMA5A|SLIT2|NRXN1|RAPGEF2|CUL7|ZEB2|SPON2|STK25|TBR1|SLITRK3|NLGN1|NFASC|OBSL1|MACF1|LPAR3|NG…
GO:0048858_cell projection morphogenesis	2.01107e-05	2.57612e-08	2.00593	49.9175	608	16773	1427	90	APBB2|RHOA|DDR1|CAMK2A|TNFRSF8|CRMP1|CTNNA2|CTNND2|DOK1|DVL1|EFNA3|EFNA5|CELSR3|CELSR2|EMX1|EPHA4|EPHA8|EPHB2|GBX2|GDNF|GJA1|GLI2|GPC1|TLX2|ISL1|ITGA1|KIF5C|NKX6-1|NTRK1|NR4A2|PIK3CD|PLXNA2|POU3F2|POU4F3|PRKCZ|RREB1|SEMA3F|SGK1|SIAH2|SLIT3|SPP1|SPTBN1|CNTN2|TBCE|NR2E1|UGT8|WNT5A|CXCR4|KLF7|NRP2|SYNGAP1|PHOX2B|SEMA5A|SLIT2|NRXN1|RAPGEF2|CUL7|ZEB2|SPON2|STK25|PDPN|TBR1|SLITRK3|NLGN1|NFASC|OBSL1|MAC…
GO:2000026_regulation of multicellular organismal development	2.33569e-05	3.40092e-08	1.55174	155.746	1897	15484	1427	220	ADD1|ADRA2C|AGER|AHSG|BIN1|RHOA|BCL6|BGLAP|PRDM1|BMP6|CAMK4|CASP8|CD80|TNFRSF8|SCARB2|CDSN|CDX1|AP2M1|CCR1|CRMP1|NKX2-5|CTLA4|DBN1|DVL1|ECM1|S1PR1|EFNA3|EFNA5|CELSR3|CELSR2|EMX1|EPHA3|EPHA4|EPHB2|ESR1|FANCD2|EFEMP1|FOXE3|GAK|GDNF|GJA1|GLI2|GPC1|GPX1|HLA-DOA|HLA-G|HMGCR|TLX2|HOXD3|HOXD13|HES1|HSPG2|ID2|IHH|IL1RN|IL4|INHA|IRF4|ISL1|ITPKB|JARID2|JUN|LTA|MATN1|MEIS1|MLH1|MSX1|MSX2|MYCN|NEUROG1|NKX6-1…
GO:0048869_cellular developmental process	2.58377e-05	3.92761e-08	1.3956	345.4	4207	13174	1427	431	ACTA1|ACTN2|ADAR|ADD1|PARP1|ADRA2C|AGER|ALK|BIN1|ANK2|APBB2|RHOA|ATR|BCL6|BGLAP|PRDM1|BMP6|DDR1|CAMK4|CAMK2A|CASP8|RUNX3|CD8A|CD80|TNFRSF8|SCARB2|CDSN|CDX1|CLIC1|CCR1|COL8A1|CRMP1|CRP|CRYGD|NKX2-5|CTLA4|CTNNA2|CTNND2|DGKG|DBN1|DHFR|DIAPH1|DNMT3A|DOK1|DSP|DTYMK|DVL1|S1PR1|EFNA3|EFNA5|CELSR3|CELSR2|EMX1|EN1|EPB41|EPHA3|EPHA4|EPHA8|EPHB2|EYA4|ESR1|FANCD2|EFEMP1|FGF5|FGFR3|FGR|FHL2|FOXE3|FOXD2|FLNB|N…
GO:0098742_cell-cell adhesion via plasma-membrane adhesion molecules	2.58377e-05	4.08928e-08	2.72014	19.6222	239	17142	1427	46	CDH10|CDH12|CDH18|CELSR3|CELSR2|IL1RN|PCDHGC3|TGFB2|PCDHGB4|NRXN1|PCDHGA8|PCDHA9|NLGN1|PCDHGA12|PCDH12|FGFRL1|PCDHGC5|PCDHGC4|PCDHGB7|PCDHGB6|PCDHGB5|PCDHGB3|PCDHGB2|PCDHGB1|PCDHGA11|PCDHGA10|PCDHGA9|PCDHGA7|PCDHGA6|PCDHGA5|PCDHGA4|PCDHGA3|PCDHGA2|PCDHGA1|PCDHA11|PCDHA10|PCDHA8|PCDHA7|PCDHA6|PCDHA5|PCDHA4|PCDHA3|PCDHA2|PCDHA1|IGSF9|PCDH10
GO:0009887_animal organ morphogenesis	7.44277e-05	1.22507e-07	1.7252	81.2801	990	16391	1427	128	ACTA1|ALX3|RHOA|ATP6V1B1|BGLAP|PRDM1|BMP6|DDR1|CDSN|CDX1|AP2M1|COL8A1|COL9A1|CPE|NKX2-5|CTNNA2|DSP|DVL1|S1PR1|CELSR3|CELSR2|EMX1|EPHB2|ESR1|FANCD2|EFEMP1|FGFR3|FHL2|FOXE3|NR5A2|GBX2|GDNF|GLI2|HOXD3|HOXD4|HOXD8|HOXD9|HOXD10|HOXD11|HOXD13|HES1|ID2|ID3|IHH|ITGA6|ISL1|ITGA2|JUN|MATN1|MEIS1|MSX1|MSX2|MYCN|MYLK|NEUROG1|NKX6-1|NOTCH2|NPY2R|OTX1|PAX3|PAX7|PBX1|PITX2|POU4F3|PSMB8|PSMB9|PSMD1|PSMD4|RING1|R…
GO:0050793_regulation of developmental process	8.09908e-05	1.38437e-07	1.46569	200.491	2442	14939	1427	268	ADD1|PARP1|ADRA2C|AGER|AHSG|BIN1|RHOA|BCL6|BGLAP|PRDM1|BMP6|CAMK4|CASP8|RUNX3|CD80|TNFRSF8|SCARB2|CDSN|CDX1|AP2M1|CLIC1|CCR1|CRMP1|CRP|NKX2-5|CTLA4|CTNNA2|DBN1|DIAPH1|DVL1|ECM1|S1PR1|EFNA3|EFNA5|CELSR3|CELSR2|EMX1|EPB41|EPHA3|EPHA4|EPHB2|ESR1|FANCD2|EFEMP1|FGFR3|FGR|FOXE3|FLT4|GAK|GDNF|GJA1|GLI2|GPC1|GPX1|HLA-DOA|HLA-G|HMGCR|HMGA1|TLX2|HOXD3|HOXD13|HES1|HSP90AB1|HSPG2|ID2|ID3|IHH|IL1RN|IL4|ING2|I…
GO:0032989_cellular component morphogenesis	9.4798e-05	1.68039e-07	1.70276	84.1537	1025	16356	1427	131	ACTA1|ACTN2|ADD1|ANK2|APBB2|RHOA|BCL6|DDR1|CAMK2A|TNFRSF8|CRMP1|NKX2-5|CTNNA2|CTNND2|DIAPH1|DOK1|DVL1|EFNA3|EFNA5|CELSR3|CELSR2|EMX1|EPB41|EPHA4|EPHA8|EPHB2|FGR|FLNB|GBX2|GDNF|GJA1|GLI2|GPC1|TLX2|AGFG1|HES1|IHH|ISL1|ITGA1|KIF5C|MATN1|MSX1|MYO10|NDUFS6|NKX6-1|NOTCH4|NTRK1|NR4A2|PIK3CD|PLXNA2|POU3F2|POU4F3|PRKCZ|RREB1|S100A13|SEMA3F|SGK1|SIAH2|SLC1A3|SLIT3|SPP1|SPTBN1|TAL1|CNTN2|TBCE|TGFB2|NR2E1|UG…
GO:0031175_neuron projection development	0.000149116	2.73764e-07	1.74244	72.8237	887	16494	1427	116	AGER|APBB2|RHOA|DDR1|CAMK2A|TNFRSF8|SCARB2|CRMP1|CTNNA2|CTNND2|DBN1|DHFR|DOK1|DVL1|EFNA3|EFNA5|CELSR3|CELSR2|EMX1|EPHA3|EPHA4|EPHA8|EPHB2|GAK|GBX2|GDNF|GJA1|GLI2|GPC1|TLX2|HES1|ISL1|ITGA1|JUN|KIF5C|NKX6-1|NTRK1|NR4A2|PIK3CD|PLXNA2|POU3F2|POU4F3|PRKCZ|PTPRF|PTPRG|PTPRK|SEMA3F|SFRP2|SGK1|SIAH2|SLIT3|SPOCK1|SPP1|SPTBN1|CNTN2|TBCE|NR2E1|UCN|UGT8|WNT5A|CXCR4|NCK2|CAMK1|KLF7|NRP2|SYNGAP1|CFLAR|PHOX2B|S…
GO:0000902_cell morphogenesis	0.000153586	2.91692e-07	1.72329	76.1078	927	16454	1427	120	ADD1|APBB2|RHOA|BCL6|DDR1|CAMK2A|TNFRSF8|CRMP1|CTNNA2|CTNND2|DIAPH1|DOK1|DVL1|EFNA3|EFNA5|CELSR3|CELSR2|EMX1|EPB41|EPHA4|EPHA8|EPHB2|FGR|FLNB|GBX2|GDNF|GJA1|GLI2|GPC1|TLX2|HES1|IHH|ISL1|ITGA1|KIF5C|MATN1|MSX1|MYO10|NKX6-1|NOTCH4|NTRK1|NR4A2|PIK3CD|PLXNA2|POU3F2|POU4F3|PRKCZ|RREB1|S100A13|SEMA3F|SGK1|SIAH2|SLC1A3|SLIT3|SPP1|SPTBN1|TAL1|CNTN2|TBCE|TGFB2|NR2E1|UGT8|WNT5A|CXCR4|KLF7|NRP2|SYNGAP1|PHOX…
GO:0048667_cell morphogenesis involved in neuron differentiation	0.00016828	3.30253e-07	1.97405	43.6778	532	16849	1427	78	APBB2|RHOA|CAMK2A|TNFRSF8|CRMP1|CTNNA2|CTNND2|DOK1|DVL1|EFNA3|EFNA5|CELSR3|CELSR2|EPHA4|EPHA8|EPHB2|GBX2|GDNF|GLI2|GPC1|TLX2|HES1|ISL1|KIF5C|NKX6-1|NTRK1|NR4A2|PIK3CD|PLXNA2|POU3F2|POU4F3|SEMA3F|SIAH2|SLC1A3|SLIT3|SPP1|SPTBN1|CNTN2|TBCE|NR2E1|WNT5A|CXCR4|KLF7|NRP2|SYNGAP1|PHOX2B|SEMA5A|SLIT2|NRXN1|RAPGEF2|CUL7|ZEB2|SPON2|STK25|TBR1|SLITRK3|NLGN1|NFASC|OBSL1|MACF1|LPAR3|NGEF|VAX2|DNM3|TLR9|SEMA5B|…
GO:0061564_axon development	0.000225719	4.57268e-07	2.02562	38.8338	473	16908	1427	71	APBB2|RHOA|DDR1|TNFRSF8|CRMP1|CTNNA2|DHFR|DOK1|DVL1|EFNA3|EFNA5|CELSR3|EPHA3|EPHA4|EPHA8|EPHB2|GBX2|GDNF|GLI2|GPC1|ISL1|JUN|KIF5C|NKX6-1|NTRK1|NR4A2|PIK3CD|PLXNA2|POU3F2|POU4F3|PTPRF|SEMA3F|SIAH2|SLIT3|SPP1|SPTBN1|CNTN2|TBCE|NR2E1|WNT5A|CXCR4|KLF7|NRP2|SYNGAP1|PHOX2B|SEMA5A|SLIT2|NRXN1|ZEB2|SPON2|STK25|TBR1|SLITRK3|NFASC|MACF1|LPAR3|VAX2|TLR9|SEMA5B|DPYSL5|SEMA3G|VANGL2|ALS2|TNN|TRAK2|TRIM46|LHX4…
GO:0022610_biological adhesion	0.000226107	4.72368e-07	1.578	113.053	1377	16004	1427	164	ACTN2|AGER|RHOA|BCL6|BGLAP|PRDM1|DDR1|CAMK4|CD80|CDH10|CDH12|CDH18|CDSN|CLIC1|CCR1|COL6A3|COL8A1|COL16A1|CSRP1|CTLA4|CTNNA2|CTNND2|DSP|S1PR1|EFNA5|CELSR3|CELSR2|EPHA3|EPHA4|EPHA8|FANCD2|FAP|FBLN2|GLI2|GP9|HLA-DOA|HLA-DRA|HLA-E|HLA-G|HOXD3|HES1|HSP90AB1|IGFBP2|IHH|IL1RN|IL4|ITGA6|IRF4|ITGA1|ITGA2|ITGA9|ITPKB|MUC4|MYO10|NEDD9|NPY2R|CNTN3|PCDHGC3|PDCD1|PLEK|PPP2CA|PRKCD|PRKCE|PRKCZ|PTPRF|PTPRK|RREB1…
GO:0007155_cell adhesion	0.000247356	5.48078e-07	1.57557	112.479	1370	16011	1427	163	ACTN2|AGER|RHOA|BCL6|BGLAP|PRDM1|DDR1|CAMK4|CD80|CDH10|CDH12|CDH18|CDSN|CLIC1|CCR1|COL6A3|COL8A1|COL16A1|CSRP1|CTLA4|CTNNA2|CTNND2|DSP|S1PR1|EFNA5|CELSR3|CELSR2|EPHA3|EPHA4|EPHA8|FANCD2|FAP|FBLN2|GLI2|GP9|HLA-DOA|HLA-DRA|HLA-E|HLA-G|HOXD3|HES1|IGFBP2|IHH|IL1RN|IL4|ITGA6|IRF4|ITGA1|ITGA2|ITGA9|ITPKB|MUC4|MYO10|NEDD9|NPY2R|CNTN3|PCDHGC3|PDCD1|PLEK|PPP2CA|PRKCD|PRKCE|PRKCZ|PTPRF|PTPRK|RREB1|SFRP2|SP…
GO:0030154_cell differentiation	0.000247356	5.34114e-07	1.36032	331.36	4036	13345	1427	408	ACTA1|ACTN2|ADAR|ADD1|PARP1|ADRA2C|AGER|ALK|BIN1|ANK2|APBB2|RHOA|BCL6|BGLAP|PRDM1|BMP6|DDR1|CAMK4|CAMK2A|CASP8|RUNX3|CD8A|CD80|TNFRSF8|SCARB2|CDSN|CDX1|CLIC1|CCR1|COL8A1|CRMP1|CRP|CRYGD|NKX2-5|CTLA4|CTNNA2|CTNND2|DGKG|DBN1|DHFR|DNMT3A|DOK1|DSP|DTYMK|DVL1|S1PR1|EFNA3|EFNA5|CELSR3|CELSR2|EMX1|EN1|EPHA3|EPHA4|EPHA8|EPHB2|EYA4|ESR1|FANCD2|EFEMP1|FGF5|FGFR3|FGR|FHL2|FOXE3|FOXD2|FLNB|NR5A2|GABRB1|GABRB…
GO:0010604_positive regulation of macromolecule metabolic process	0.000269449	6.24378e-07	1.39662	251.722	3066	14315	1427	321	ACTA1|ADAR|ADCY3|ADCY5|ADORA1|PARP1|ADRA1B|ADRA2C|AGER|ALK|ANK2|RHOA|ATP2B4|ATR|BCL6|PRDM1|BMP6|CAMK4|CASP8|CASR|RUNX3|CCND3|CD80|TNFRSF8|CD38|CDX1|CKS1B|CCR1|ATF6B|CRP|NKX2-5|DGKQ|DAXX|DVL1|ECE1|S1PR1|EFNA3|EFNA5|EN1|ENO1|EPHA4|EPHA8|EPHB2|EYA4|ESR1|ESRRG|F2R|F12|FGFR3|FGFR4|FHL2|FOXD2|FLT4|NR5A2|GBX2|GDNF|GJA1|GLI2|GNAI2|GRM4|UBE2K|ZBTB48|HMGCR|HMGA1|HNRNPD|TLX2|HOXD3|HOXD4|HOXD8|HOXD9|HOXD10|H…
GO:0048522_positive regulation of cellular process	0.000269449	6.31149e-07	1.33401	411.819	5016	12365	1427	493	ACTN2|ADCY3|ADCY5|ADD1|ADORA1|ADORA3|PARP1|ADRA1B|ADRA2C|AGER|AHSG|ALK|BIN1|ANK2|APBB2|RHOA|ATP2B4|ATR|BCL6|PRDM1|BMP6|C2|C4A|C4B|CAMK4|CAMK2A|CASP8|CASR|RUNX3|CCND3|CD8A|CD80|TNFRSF8|SCARB2|CD38|CDC25C|CDX1|CKS1B|CLIC1|CCR1|COL16A1|ATF6B|CRP|NKX2-5|CTLA4|CTNNA2|DGKQ|DAXX|DIAPH1|DNMT3A|DOK1|DUSP1|DVL1|ECE1|ECM1|S1PR1|EFNA3|EFNA5|EN1|ENO1|EPHA3|EPHA4|EPHA8|EPHB2|EYA4|ESR1|ESRRG|F2R|F12|FABP1|FAP|F…
GO:0007409_axonogenesis	0.000277034	6.66452e-07	2.0596	35.5498	433	16948	1427	66	APBB2|RHOA|TNFRSF8|CRMP1|CTNNA2|DOK1|DVL1|EFNA3|EFNA5|CELSR3|EPHA4|EPHA8|EPHB2|GBX2|GDNF|GLI2|GPC1|ISL1|KIF5C|NKX6-1|NTRK1|NR4A2|PIK3CD|PLXNA2|POU3F2|POU4F3|SEMA3F|SIAH2|SLIT3|SPP1|SPTBN1|CNTN2|TBCE|NR2E1|WNT5A|CXCR4|KLF7|NRP2|SYNGAP1|PHOX2B|SEMA5A|SLIT2|NRXN1|ZEB2|SPON2|STK25|TBR1|SLITRK3|NFASC|MACF1|LPAR3|VAX2|TLR9|SEMA5B|DPYSL5|SEMA3G|VANGL2|ALS2|TNN|TRAK2|TRIM46|LHX4|UNC5A|WDR36|BARHL2|TUBB2B
GO:0097485_neuron projection guidance	0.00031689	7.82395e-07	2.52948	18.9654	231	17150	1427	42	APBB2|TNFRSF8|CRMP1|DOK1|DVL1|EFNA3|EFNA5|CELSR3|EPHA4|EPHA8|EPHB2|GBX2|GDNF|GLI2|GPC1|ISL1|KIF5C|NTRK1|PIK3CD|PLXNA2|POU4F3|SEMA3F|SIAH2|SLIT3|SPTBN1|CNTN2|WNT5A|CXCR4|KLF7|NRP2|SEMA5A|SLIT2|NRXN1|SPON2|TBR1|NFASC|SEMA5B|DPYSL5|VANGL2|LHX4|UNC5A|TUBB2B
GO:0051960_regulation of nervous system development	0.00035683	9.03595e-07	1.74691	64.942	791	16590	1427	104	ADRA2C|AGER|BIN1|RHOA|BCL6|BMP6|TNFRSF8|SCARB2|CRMP1|NKX2-5|DBN1|DVL1|EFNA5|EMX1|EPHA3|EPHA4|EPHB2|GAK|GLI2|TLX2|HOXD3|HES1|ID2|ISL1|LTA|MEIS1|MYCN|NEUROG1|NKX6-1|NTRK1|OXTR|PBX1|PLXNA2|POU3F2|PPARG|PTPRF|PTPRG|SEMA3F|SFRP2|SKI|SNCA|SPOCK1|SPP1|CNTN2|TERT|THBS2|NR2E1|TP73|TPBG|WNT5A|CXCR4|SOX14|CAMK1|CHRD|SYNGAP1|CFLAR|PHOX2B|SEMA5A|GPR37L1|SLIT2|NRXN1|KDM4A|RAPGEF2|CUL7|ZEB2|KIAA0319|STK25|TBR1|…
GO:0045665_negative regulation of neuron differentiation	0.000360439	9.35554e-07	2.69566	15.8455	193	17188	1427	37	RHOA|TNFRSF8|CRMP1|EPHA4|EPHB2|GAK|TLX2|HES1|ID2|ISL1|MEIS1|PBX1|PTPRG|SEMA3F|SPOCK1|SPP1|CNTN2|NR2E1|TP73|WNT5A|SYNGAP1|PHOX2B|SEMA5A|GPR37L1|SLIT2|RAPGEF2|KIAA0319|NLGN1|NGEF|DNM3|DLL1|TLX3|BCL11A|SEMA3G|CTDSP1|TRAK2|ITM2C
GO:0051961_negative regulation of nervous system development	0.00043494	1.15646e-06	2.37128	21.921	267	17114	1427	46	RHOA|TNFRSF8|CRMP1|EPHA4|EPHB2|GAK|TLX2|HES1|ID2|ISL1|MEIS1|MYCN|NKX6-1|PBX1|PTPRG|SEMA3F|SKI|SPOCK1|SPP1|CNTN2|TERT|NR2E1|TP73|WNT5A|CHRD|SYNGAP1|PHOX2B|SEMA5A|GPR37L1|SLIT2|KDM4A|RAPGEF2|KIAA0319|NLGN1|NGEF|DNM3|TRAF3IP1|TNFRSF21|DLL1|TLX3|BCL11A|SEMA3G|CTDSP1|TRAK2|TRIM11|ITM2C
GO:0007411_axon guidance	0.000584621	1.59146e-06	2.48076	18.8012	229	17152	1427	41	APBB2|TNFRSF8|CRMP1|DOK1|DVL1|EFNA3|EFNA5|CELSR3|EPHA4|EPHA8|EPHB2|GBX2|GDNF|GLI2|GPC1|ISL1|KIF5C|NTRK1|PIK3CD|PLXNA2|POU4F3|SEMA3F|SIAH2|SLIT3|SPTBN1|CNTN2|WNT5A|CXCR4|KLF7|NRP2|SEMA5A|SLIT2|NRXN1|SPON2|TBR1|NFASC|DPYSL5|VANGL2|LHX4|UNC5A|TUBB2B
GO:0071840_cellular component organization or biogenesis	0.000676498	1.88439e-06	1.30084	514.446	6266	11115	1427	596	ABCA4|ACTA1|ACTN2|ADAR|ADD1|PARP1|AGER|AHSG|ALAS1|BIN1|ANK2|APBB2|RHOA|ATP5I|ATP6V1B1|ATP6V1G2|ATR|BCL6|C2|C4A|C4B|DDR1|CACNB4|CAMK2A|CASP8|TNFRSF8|SCARB2|CD38|CDK11B|CDC25C|CDH10|CDH12|CDH18|AP2M1|CLCN6|COL6A3|COL8A1|COL9A1|COL9A2|COL11A2|COL16A1|CRMP1|CRYZ|NKX2-5|CTNNA2|CTNND2|DGKQ|DARS|DAXX|DBN1|DFFB|DHFR|DIAPH1|DNMT3A|DOK1|DR1|DSP|DUSP1|DVL1|S1PR1|EFNA3|EFNA5|CELSR3|CELSR2|EMX1|ENO1|EPB41|EPH…
GO:0050768_negative regulation of neurogenesis	0.000677453	1.92994e-06	2.39874	20.279	247	17134	1427	43	RHOA|TNFRSF8|CRMP1|EPHA4|EPHB2|GAK|TLX2|HES1|ID2|ISL1|MEIS1|MYCN|NKX6-1|PBX1|PTPRG|SEMA3F|SKI|SPOCK1|SPP1|CNTN2|TERT|NR2E1|TP73|WNT5A|SYNGAP1|PHOX2B|SEMA5A|GPR37L1|SLIT2|KDM4A|RAPGEF2|KIAA0319|NLGN1|NGEF|DNM3|DLL1|TLX3|BCL11A|SEMA3G|CTDSP1|TRAK2|TRIM11|ITM2C
GO:0016043_cellular component organization	0.00068572	1.9969e-06	1.30195	497.205	6056	11325	1427	578	ABCA4|ACTA1|ACTN2|ADAR|ADD1|PARP1|AGER|AHSG|ALAS1|BIN1|ANK2|APBB2|RHOA|ATP5I|ATP6V1B1|ATP6V1G2|ATR|BCL6|C2|C4A|C4B|DDR1|CACNB4|CAMK2A|CASP8|TNFRSF8|SCARB2|CD38|CDK11B|CDC25C|CDH10|CDH12|CDH18|AP2M1|CLCN6|COL6A3|COL8A1|COL9A1|COL9A2|COL11A2|COL16A1|CRMP1|CRYZ|NKX2-5|CTNNA2|CTNND2|DGKQ|DARS|DAXX|DBN1|DFFB|DHFR|DIAPH1|DNMT3A|DOK1|DR1|DSP|DUSP1|DVL1|S1PR1|EFNA3|EFNA5|CELSR3|CELSR2|EMX1|ENO1|EPB41|EPH…
GO:0052695_cellular glucuronidation	0.000736108	2.19024e-06	12.6511	1.39572	17	17364	1427	9	PRKCE|UGT1A10|UGT1A8|UGT1A7|UGT1A6|UGT1A5|UGT1A9|UGT1A4|UGT1A3
GO:0000904_cell morphogenesis involved in differentiation	0.000840224	2.55322e-06	1.77907	54.5152	664	16717	1427	89	APBB2|RHOA|CAMK2A|TNFRSF8|CRMP1|CTNNA2|CTNND2|DOK1|DVL1|EFNA3|EFNA5|CELSR3|CELSR2|EPHA4|EPHA8|EPHB2|FLNB|GBX2|GDNF|GLI2|GPC1|TLX2|HES1|IHH|ISL1|KIF5C|MATN1|NKX6-1|NOTCH4|NTRK1|NR4A2|PIK3CD|PLXNA2|POU3F2|POU4F3|RREB1|SEMA3F|SIAH2|SLC1A3|SLIT3|SPP1|SPTBN1|TAL1|CNTN2|TBCE|NR2E1|WNT5A|CXCR4|KLF7|NRP2|SYNGAP1|PHOX2B|SEMA5A|SLIT2|NRXN1|RAPGEF2|CUL7|ZEB2|SPON2|STK25|PDPN|TBR1|BVES|SLITRK3|NLGN1|NFASC|NB…
GO:0045596_negative regulation of cell differentiation	0.000971918	3.07647e-06	1.7695	54.7615	667	16714	1427	89	RHOA|BCL6|TNFRSF8|CDSN|CRMP1|CRP|NKX2-5|CTLA4|EFNA5|EPHA4|EPHB2|EFEMP1|FOXE3|GAK|GLI2|HLA-G|TLX2|HES1|ID2|ID3|IHH|IL4|INHA|ISL1|ITPKB|MEIS1|MSX1|MSX2|MYCN|NKX6-1|NOTCH4|PBX1|PPARG|PPP2CA|PTPRG|SEMA3F|SFRP2|SKI|SPOCK1|SPP1|CNTN2|TCTA|TERT|TGFB2|NR2E1|TNF|TP73|TRIO|WNT5A|WNT9A|HIST1H4I|HIST1H4A|HIST1H4F|HIST1H4K|HIST1H4L|CHRD|SYNGAP1|CFLAR|PHOX2B|SEMA5A|GPR37L1|SLIT2|HAND2|CXCL14|SOCS5|KDM4A|RAPGEF…
GO:0098609_cell-cell adhesion	0.000971918	3.03222e-06	1.69276	66.6661	812	16569	1427	104	AGER|BCL6|PRDM1|CAMK4|CD80|CDH10|CDH12|CDH18|CDSN|CLIC1|CSRP1|CTLA4|CTNNA2|CTNND2|DSP|EFNA5|CELSR3|CELSR2|FANCD2|GLI2|HLA-DOA|HLA-DRA|HLA-E|HLA-G|HES1|IGFBP2|IHH|IL1RN|IL4|ITGA6|IRF4|ITPKB|MYO10|PCDHGC3|PDCD1|PLEK|PRKCD|PRKCZ|STK10|TGFB2|THBS4|TNF|WNT5A|ZAP70|NCK2|PKP4|PCDHGB4|TNFRSF18|BCL10|NRXN1|SOCS5|PCDHGA8|PCDHA9|PTPRU|PDPN|BVES|NLGN1|NFASC|METAP1|PCDHGA12|CYFIP2|TNFRSF21|ZBTB7B|PCDH12|FGFRL…
GO:0051241_negative regulation of multicellular organismal process	0.00112869	3.64417e-06	1.58424	90.7218	1105	16276	1427	133	ADORA1|ADRA2C|AGER|AHSG|RHOA|ATP2B4|BCL6|TNFRSF8|CD38|CDSN|CCR1|CRMP1|CTLA4|ECM1|EFNA3|EPHA4|EPHB2|F2R|F12|FAP|EFEMP1|FOXE3|GAK|GJA1|GLI2|GLRA1|HLA-G|TLX2|HES1|HSP90AB1|HSPG2|ID2|ID3|IHH|IL4|INHA|INHBB|ISL1|ITPKB|JARID2|LRPAP1|MCC|MEIS1|MSX2|MYCN|NEUROG1|NFKBIL1|NKX6-1|NPPA|NPR1|NPY2R|OXTR|PBX1|PDCD1|PDE4B|PDE4D|PFN2|PPARG|PPP2CA|PRKCD|PROC|PTGER3|PTPRG|TRIM27|RGS2|SEMA3F|SFRP2|SKI|SLC11A1|SP100|…
GO:0007389_pattern specification process	0.00150193	4.94432e-06	1.9675	34.6467	422	16959	1427	62	ALX3|CDX1|NKX2-5|CELSR2|EMX1|EN1|GBX2|GDNF|GLI2|HOXD3|HOXD4|HOXD8|HOXD9|HOXD10|HOXD11|HOXD12|HOXD13|HES1|IHH|ISL1|MSX1|MSX2|NEUROG1|NKX6-1|OTX1|PAX7|PBX1|PITX2|PLXNA2|RING1|SEMA3F|SFRP2|SKI|T|WNT5A|WNT6|ZIC1|PAX8|FZD5|CHRD|SYNGAP1|TBX18|HAND2|ZEB2|SPRY1|BASP1|LEFTY1|TBR1|SCMH1|SSBP3|VAX2|TRAF3IP1|DLL1|IRX4|CYP26B1|VANGL2|SHROOM3|DMRTA2|IRX1|IRX2|GSX2|RNF207
GO:0009893_positive regulation of metabolic process	0.00166177	5.57572e-06	1.34526	271.591	3308	14073	1427	336	ACTA1|ADAR|ADCY3|ADCY5|ADORA1|ADORA3|PARP1|ADRA1B|ADRA2C|AGER|ALK|ANK2|RHOA|ATP2B4|ATR|BCL6|PRDM1|BMP6|CAMK4|CASP8|CASR|RUNX3|CCND3|CD80|TNFRSF8|CD38|CDX1|CKS1B|CCR1|ATF6B|CRP|NKX2-5|DGKQ|DAXX|DHFR|DVL1|ECE1|S1PR1|EFNA3|EFNA5|EN1|ENO1|EPHA4|EPHA8|EPHB2|EYA4|ESR1|ESRRG|F2R|F12|FABP1|FGFR3|FGFR4|FGR|FHL2|FOXD2|FLT4|NR5A2|GBX2|GDNF|GJA1|GLI2|GNAI2|GRM4|HTT|UBE2K|ZBTB48|HMGCR|HMGA1|HNRNPD|TLX2|HOXD3|…
GO:0045664_regulation of neuron differentiation	0.00187967	6.42582e-06	1.802	47.1261	574	16807	1427	78	ADRA2C|BIN1|RHOA|BCL6|BMP6|TNFRSF8|SCARB2|CRMP1|NKX2-5|DBN1|DVL1|EFNA5|EPHA3|EPHA4|EPHB2|GAK|GLI2|TLX2|HOXD3|HES1|ID2|ISL1|MEIS1|MYCN|NEUROG1|NKX6-1|NTRK1|PBX1|PLXNA2|POU3F2|PTPRF|PTPRG|SEMA3F|SFRP2|SPOCK1|SPP1|CNTN2|NR2E1|TP73|WNT5A|CAMK1|SYNGAP1|CFLAR|PHOX2B|SEMA5A|GPR37L1|SLIT2|KDM4A|RAPGEF2|CUL7|ZEB2|KIAA0319|STK25|TBR1|NLGN1|OBSL1|MACF1|LPAR3|NGEF|DNM3|HEYL|DLL1|PACSIN1|TLX3|BCL11A|CASZ1|ULK…
GO:0006366_transcription from RNA polymerase II promoter	0.0021189	7.78022e-06	1.4049	178.077	2169	15212	1427	232	PARP1|ATP2B4|BCL6|PRDM1|BMP6|RUNX3|CCND3|CDX1|ATF6B|NKX2-5|DGKQ|DNMT3A|DR1|DVL1|ECM1|S1PR1|EN1|ENO1|ESR1|ESRRG|FHL2|FOXE3|FOXD2|NR5A2|GBX2|GDNF|GLI2|GLO1|GTF2E1|GTF2H4|HIVEP1|HIVEP2|HMGA1|TLX2|HOXD3|HOXD4|HOXD8|HOXD9|HOXD10|HOXD13|HES1|HSPA1A|ID3|IHH|IL4|INHA|ITGA6|IRF4|IRF6|ISL1|JARID2|JUN|MXD1|MEIS1|MSX1|MSX2|MYCN|NEUROG1|NFIA|NKX6-1|NOTCH2|NOTCH4|NPAS2|NPPA|NR4A2|OTX1|PAX3|PAX7|PBX1|PCBP1|PITX…
GO:0009812_flavonoid metabolic process	0.0021189	7.70978e-06	12.8437	1.23152	15	17366	1427	8	UGT1A10|UGT1A8|UGT1A7|UGT1A6|UGT1A5|UGT1A9|UGT1A4|UGT1A3
GO:0050767_regulation of neurogenesis	0.0021189	7.40747e-06	1.71334	57.5529	701	16680	1427	91	ADRA2C|AGER|BIN1|RHOA|BCL6|BMP6|TNFRSF8|SCARB2|CRMP1|NKX2-5|DBN1|DVL1|EFNA5|EMX1|EPHA3|EPHA4|EPHB2|GAK|GLI2|TLX2|HOXD3|HES1|ID2|ISL1|LTA|MEIS1|MYCN|NEUROG1|NKX6-1|NTRK1|PBX1|PLXNA2|POU3F2|PPARG|PTPRF|PTPRG|SEMA3F|SFRP2|SKI|SPOCK1|SPP1|CNTN2|TERT|NR2E1|TP73|WNT5A|CXCR4|SOX14|CAMK1|SYNGAP1|CFLAR|PHOX2B|SEMA5A|GPR37L1|SLIT2|KDM4A|RAPGEF2|CUL7|ZEB2|KIAA0319|STK25|TBR1|NLGN1|OBSL1|OTP|MACF1|LPAR3|NGEF…
GO:1903524_positive regulation of blood circulation	0.0021189	7.75471e-06	3.98355	5.66498	69	17312	1427	18	ADRA1B|ADRA2C|AVPR1B|CASR|CD38|NKX2-5|F2R|GJA1|NPPA|OXTR|PDE4D|RGS2|RYR2|TACR1|TGFB2|UCN|GHRL|RNF207
GO:0051128_regulation of cellular component organization	0.00247404	9.24083e-06	1.38862	191.049	2327	15054	1427	246	ACTN2|ADD1|PARP1|AHSG|BIN1|APBB2|RHOA|ATR|BCL6|C2|C4A|C4B|DDR1|CASP8|TNFRSF8|SCARB2|CD38|CDK11B|CDC25C|COL16A1|CRMP1|NKX2-5|CTNNA2|DBN1|DIAPH1|DUSP1|DVL1|S1PR1|EFNA5|ENO1|EPB41|EPHA3|EPHA4|EPHB2|ESR1|FAP|FGFR4|FGR|GAK|GJA1|GNG4|GPX1|GTF2H4|HIST1H1A|HTT|HMGA1|HNRNPD|TLX2|HES1|HSPA1A|HSPA1L|IGFBP2|IL4|ING2|ISL1|ITGA2|JARID2|JUN|KIF25|LRPAP1|MSX1|MSX2|MYO10|NEUROG1|NKX6-1|NPPA|NPR1|NTRK1|OXTR|PAX7|P…
GO:0003002_regionalization	0.00256591	9.74645e-06	2.06727	27.2576	332	17049	1427	51	CDX1|NKX2-5|CELSR2|EMX1|EN1|GBX2|GDNF|GLI2|HOXD3|HOXD4|HOXD8|HOXD9|HOXD10|HOXD11|HOXD13|HES1|ISL1|MSX1|MSX2|NEUROG1|NKX6-1|OTX1|PAX7|PBX1|PITX2|PLXNA2|RING1|SEMA3F|SFRP2|SKI|T|WNT5A|PAX8|FZD5|CHRD|TBX18|ZEB2|SPRY1|BASP1|TBR1|SCMH1|SSBP3|VAX2|TRAF3IP1|DLL1|CYP26B1|VANGL2|DMRTA2|IRX1|IRX2|GSX2
GO:0045595_regulation of cell differentiation	0.00274102	1.05851e-05	1.44342	140.803	1715	15666	1427	189	ADD1|PARP1|ADRA2C|AGER|BIN1|RHOA|BCL6|BGLAP|PRDM1|BMP6|CAMK4|CASP8|RUNX3|CD80|TNFRSF8|SCARB2|CDSN|CLIC1|CCR1|CRMP1|CRP|NKX2-5|CTLA4|CTNNA2|DBN1|DVL1|EFNA5|EMX1|EPHA3|EPHA4|EPHB2|FANCD2|EFEMP1|FOXE3|GAK|GDNF|GLI2|GPC1|HLA-DOA|HLA-G|TLX2|HOXD3|HES1|HSP90AB1|ID2|ID3|IHH|IL4|INHA|IRF4|ISL1|ITPKB|JUN|LTA|MEIS1|MSX1|MSX2|MYCN|NEUROG1|NKX6-1|NOTCH4|NTRK1|PAX7|PBX1|PDCD2|PLA2G2A|PLXNA2|POU3F2|PPARG|PPP2C…
GO:0010628_positive regulation of gene expression	0.00282582	1.10915e-05	1.42849	150.573	1834	15547	1427	200	ACTA1|ADAR|PARP1|ANK2|PRDM1|BMP6|CAMK4|CASR|RUNX3|CD80|CD38|CDX1|CKS1B|ATF6B|CRP|NKX2-5|DGKQ|DVL1|S1PR1|EN1|ENO1|EPHB2|ESR1|ESRRG|F2R|F12|FGFR4|FHL2|FOXD2|NR5A2|GBX2|GDNF|GLI2|ZBTB48|HMGA1|HNRNPD|TLX2|HOXD3|HOXD4|HOXD8|HOXD9|HOXD10|HOXD13|HES1|HSPA1A|ID2|IHH|IL4|ING2|ITGA6|IRF4|IRF6|ISL1|ITGA2|JUN|MEIS1|MSX1|MYCN|MYD88|NEUROG1|NFIA|NKX6-1|NOTCH4|NPAS2|NR4A2|OTX1|PAX3|PAX7|PBX1|PCBP1|SERPINB9|PIK3…
GO:0023052_signaling	0.00413031	1.66334e-05	1.26516	533.329	6496	10885	1427	607	ABCA4|ACTN2|ADAR|ADCY3|ADCY5|ADD1|ADORA1|ADORA3|PARP1|ADRA1B|ADRA2C|AGER|AHSG|ALK|ANK2|APBB2|RHOA|ATP2B4|ATP6V1B1|ATP6V1G2|ATR|AVPR1B|BCL6|PRDM1|BMP6|CACNA1D|DDR1|CACNB4|CAMK4|CAMK2A|CANX|CASP8|CASR|CCND3|CD8A|CD80|TNFRSF8|CD38|CDC25C|AP2M1|CLCN6|CLIC1|CCR1|CNGA3|CNR2|COL16A1|CPE|ATF6B|NKX2-5|CTLA4|CTNND2|DGKG|DGKQ|DAXX|DBN1|DOK1|DSP|DUSP1|DVL1|ECE1|ECM1|S1PR1|EFNA3|EFNA5|CELSR3|CELSR2|ENO1|SLC29…
GO:0040007_growth	0.00413031	1.67346e-05	1.57712	78.4066	955	16426	1427	115	ADD1|APBB2|BCL6|DDR1|CD38|CDK11B|NKX2-5|DVL1|S1PR1|EFNA5|EMX1|EN1|ENO1|ESR1|FGFR3|GJA1|GLI2|GNG4|GPD2|GPX1|HOXD13|HSPA1A|HSPG2|IGFBP2|IHH|ING2|JARID2|LTA|MATN1|MEIS1|MSX1|MSX2|NDUFS6|NEDD9|NKX6-1|NOTCH2|NPPA|NPR1|PAX7|PDE4D|PLS1|PLXNA2|POU3F2|POU4F3|PPARG|PPP2CA|PRKCZ|SEMA3F|SFRP2|SGK1|SLC6A3|SLIT3|SPOCK1|SPP1|TBCE|TEC|TGFB2|LEFTY2|TNF|TP73|UCN|WNT5A|SORBS2|DGKD|RUVBL1|NRP2|CFLAR|WISP3|SQSTM1|SEM…
GO:0051093_negative regulation of developmental process	0.00416229	1.71277e-05	1.59261	74.3015	905	16476	1427	110	AHSG|RHOA|BCL6|TNFRSF8|CDSN|CCR1|CRMP1|CRP|NKX2-5|CTLA4|ECM1|EFNA3|EFNA5|EPHA4|EPHB2|EFEMP1|FGFR3|FOXE3|GAK|GJA1|GLI2|HLA-G|TLX2|HES1|HSPG2|ID2|ID3|IHH|IL4|INHA|ISL1|ITPKB|JARID2|MEIS1|MSX1|MSX2|MYCN|NKX6-1|NOTCH4|NPR1|PBX1|PDCD1|PPARG|PPP2CA|PTPRG|SEMA3F|SFRP2|SKI|SPOCK1|SPP1|CNTN2|TCTA|TERT|TGFB2|THBS2|THBS4|NR2E1|TNF|TP73|TRIO|WNT5A|WNT9A|PAX8|HIST1H4I|HIST1H4A|HIST1H4F|HIST1H4K|HIST1H4L|CHRD|…
GO:0006357_regulation of transcription from RNA polymerase II promoter	0.00433109	1.81314e-05	1.40181	162.396	1978	15403	1427	212	PARP1|ATP2B4|BCL6|PRDM1|BMP6|RUNX3|CCND3|CDX1|ATF6B|NKX2-5|DGKQ|DNMT3A|DR1|ECM1|S1PR1|EN1|ENO1|ESR1|ESRRG|FHL2|FOXE3|FOXD2|NR5A2|GBX2|GDNF|GLI2|GLO1|GTF2H4|HIVEP1|HMGA1|TLX2|HOXD3|HOXD4|HOXD8|HOXD9|HOXD10|HOXD13|HES1|HSPA1A|ID3|IHH|IL4|INHA|ITGA6|IRF4|IRF6|ISL1|JARID2|JUN|MXD1|MEIS1|MSX1|MSX2|MYCN|NEUROG1|NFIA|NKX6-1|NOTCH4|NPAS2|NR4A2|OTX1|PAX3|PAX7|PBX1|PCBP1|PITX2|PLAGL1|POU3F2|POU4F3|PPARG|PS…
GO:0097659_nucleic acid-templated transcription	0.00433109	1.83707e-05	1.30492	315.35	3841	13540	1427	379	ACTN2|ADORA3|PARP1|AGER|ALK|ALX3|APBB2|ATP2B4|BCL6|PRDM1|BMP6|CAMK4|CAMK2A|RUNX3|CCND3|CD80|CD38|CDK11B|CDX1|CKS1B|ATF6B|NKX2-5|CTNND2|DGKQ|DAXX|DHFR|DNMT3A|DR1|DVL1|EBF1|ECM1|S1PR1|EEF1A1|CELSR2|EMX1|EN1|ENO1|EYA4|ESR1|ESRRG|F2R|FANCD2|EFEMP1|FHIT|FHL2|FOXE3|FOXD2|NR5A2|GBX2|GDNF|GLI2|GLO1|GTF2E1|GTF2H4|GTF3C2|HIVEP1|HIVEP2|ZBTB48|HMGA1|HNRNPD|TLX2|HOXD1|HOXD3|HOXD4|HOXD8|HOXD9|HOXD10|HOXD11|HOX…
GO:0006351_transcription, DNA-templated	0.00467727	2.06608e-05	1.30324	313.873	3823	13558	1427	377	ADORA3|PARP1|AGER|ALK|ALX3|APBB2|ATP2B4|BCL6|PRDM1|BMP6|CAMK4|CAMK2A|RUNX3|CCND3|CD80|CD38|CDK11B|CDX1|CKS1B|ATF6B|NKX2-5|CTNND2|DGKQ|DAXX|DHFR|DNMT3A|DR1|DVL1|EBF1|ECM1|S1PR1|EEF1A1|CELSR2|EMX1|EN1|ENO1|EYA4|ESR1|ESRRG|F2R|FANCD2|EFEMP1|FHIT|FHL2|FOXE3|FOXD2|NR5A2|GBX2|GDNF|GLI2|GLO1|GTF2E1|GTF2H4|GTF3C2|HIVEP1|HIVEP2|ZBTB48|HMGA1|HNRNPD|TLX2|HOXD1|HOXD3|HOXD4|HOXD8|HOXD9|HOXD10|HOXD11|HOXD12|HO…
GO:0010721_negative regulation of cell development	0.00467727	2.07273e-05	2.10524	23.6451	288	17093	1427	45	RHOA|TNFRSF8|CRMP1|EFNA5|EPHA4|EPHB2|GAK|TLX2|HES1|ID2|ISL1|MEIS1|MYCN|NKX6-1|PBX1|PTPRG|SEMA3F|SKI|SPOCK1|SPP1|CNTN2|TERT|NR2E1|TP73|WNT5A|SYNGAP1|PHOX2B|SEMA5A|GPR37L1|SLIT2|KDM4A|RAPGEF2|KIAA0319|NLGN1|NGEF|DNM3|DLL1|TLX3|BCL11A|RCC2|SEMA3G|CTDSP1|TRAK2|TRIM11|ITM2C
GO:0032774_RNA biosynthetic process	0.00467727	2.05372e-05	1.30239	316.664	3857	13524	1427	380	ACTN2|ADORA3|PARP1|AGER|ALK|ALX3|APBB2|ATP2B4|BCL6|PRDM1|BMP6|CAMK4|CAMK2A|RUNX3|CCND3|CD80|CD38|CDK11B|CDX1|CKS1B|ATF6B|NKX2-5|CTNND2|DGKQ|DAXX|DHFR|DNMT3A|DR1|DVL1|EBF1|ECM1|S1PR1|EEF1A1|CELSR2|EMX1|EN1|ENO1|EYA4|ESR1|ESRRG|F2R|FANCD2|EFEMP1|FHIT|FHL2|FOXE3|FOXD2|NR5A2|GBX2|GDNF|GLI2|GLO1|GTF2E1|GTF2H4|GTF3C2|HIVEP1|HIVEP2|ZBTB48|HMGA1|HNRNPD|TLX2|HOXD1|HOXD3|HOXD4|HOXD8|HOXD9|HOXD10|HOXD11|HOX…
GO:0120036_plasma membrane bounded cell projection organization	0.00556168	2.49987e-05	1.46774	113.135	1378	16003	1427	155	ACTN2|AGER|APBB2|RHOA|DDR1|CAMK2A|TNFRSF8|SCARB2|CRMP1|CTNNA2|CTNND2|DBN1|DHFR|DOK1|DVL1|S1PR1|EFNA3|EFNA5|CELSR3|CELSR2|EMX1|EPHA3|EPHA4|EPHA8|EPHB2|GAK|GBX2|GDNF|GJA1|GLI2|GPC1|HTT|TLX2|HES1|ITGA6|ISL1|ITGA1|JUN|KIF5C|MYLK|MYO10|NKX6-1|NTRK1|NR4A2|PFN2|PIK3CD|PLEK|PLS1|PLXNA2|POU3F2|POU4F3|PRKCD|PRKCZ|PTPRF|PTPRG|PTPRK|RREB1|SEMA3F|SFRP2|SGK1|SIAH2|SLIT3|SPOCK1|SPP1|SPTBN1|CNTN2|TBCE|NR2E1|UCN|…
GO:0006063_uronic acid metabolic process	0.00655281	3.06981e-05	7.78285	1.80623	22	17359	1427	9	PRKCE|UGT1A10|UGT1A8|UGT1A7|UGT1A6|UGT1A5|UGT1A9|UGT1A4|UGT1A3
GO:0007166_cell surface receptor signaling pathway	0.00655281	2.99129e-05	1.33285	232.51	2832	14549	1427	288	ADAR|ADCY5|ADORA1|ADORA3|PARP1|ADRA2C|AGER|AHSG|ALK|RHOA|ATP6V1B1|ATP6V1G2|BCL6|PRDM1|BMP6|DDR1|CAMK2A|CANX|CASP8|CCND3|CD8A|TNFRSF8|CD38|AP2M1|CCR1|COL16A1|CPE|NKX2-5|CTLA4|CTNND2|DGKQ|DAXX|DOK1|DVL1|ECM1|EFNA3|EFNA5|CELSR3|CELSR2|SLC29A1|EPHA3|EPHA4|EPHA8|EPHB2|EYA4|ESR1|FANCD2|EFEMP1|FGF5|FGF12|FGFR3|FGFR4|FGR|FLT4|GDNF|GLI2|GLRA1|GMDS|GNAI2|GPC1|GPR17|GRK6|GPX1|GRB14|GRM2|GRM4|GRM6|CXCL1|HTT|…
GO:0019585_glucuronate metabolic process	0.00655281	3.06981e-05	7.78285	1.80623	22	17359	1427	9	PRKCE|UGT1A10|UGT1A8|UGT1A7|UGT1A6|UGT1A5|UGT1A9|UGT1A4|UGT1A3
GO:0019438_aromatic compound biosynthetic process	0.00676885	3.21387e-05	1.28122	360.67	4393	12988	1427	425	ACTN2|ADCY3|ADCY5|ADORA3|PARP1|AGER|ALAS1|ALK|ALX3|AMD1|AMPD2|APBB2|ATP2B4|ATP5I|ATR|BCL6|PRDM1|BMP6|CAMK4|CAMK2A|RUNX3|CCND3|CD80|CD38|CDK11B|CDX1|CKS1B|CPOX|ATF6B|NKX2-5|CTNND2|DGKQ|DAXX|DCTD|DHFR|DNMT3A|DR1|DTYMK|DUSP1|DVL1|EBF1|ECM1|S1PR1|EEF1A1|CELSR2|EMX1|EN1|ENO1|EYA4|ESR1|ESRRG|F2R|FANCD2|EFEMP1|FGFR4|FHIT|FHL2|FOXE3|FOXD2|NR5A2|GABBR1|GBX2|GDNF|GFPT1|GJA1|GLI2|GLO1|GMDS|GNAI2|GRM2|GTF2E1…
GO:0051240_positive regulation of multicellular organismal process	0.00677189	3.25819e-05	1.43511	126.764	1544	15837	1427	170	PARP1|ADRA1B|ADRA2C|AGER|BIN1|RHOA|AVPR1B|BCL6|PRDM1|BMP6|CASP8|CASR|CD80|TNFRSF8|SCARB2|CD38|CLIC1|CCR1|NKX2-5|DVL1|ECM1|EFNA5|ENO1|EPHA3|EPHA4|EPHB2|F2R|F12|FGR|FOXE3|FLT4|GDNF|GJA1|GLI2|GPC1|HLA-E|HLA-G|HMGCR|HOXD3|HES1|HSPA1A|IHH|IL4|INHA|INHBB|IRF4|ISL1|ITGA2|ITPKB|JUN|KISS1|LRPAP1|LTA|MLH1|MSX2|MYD88|NEUROG1|NKX6-1|NPPA|NPR1|NPY2R|NTRK1|OXTR|PDCD2|PDE4B|PDE4D|PLEK|PLS1|POU3F2|PPARG|PRKCE|PR…
GO:0030030_cell projection organization	0.0069078	3.36731e-05	1.45419	115.516	1407	15974	1427	157	ACTN2|AGER|APBB2|RHOA|DDR1|CAMK2A|TNFRSF8|SCARB2|CRMP1|CTNNA2|CTNND2|DBN1|DHFR|DOK1|DVL1|S1PR1|EFNA3|EFNA5|CELSR3|CELSR2|EMX1|EPHA3|EPHA4|EPHA8|EPHB2|GAK|GBX2|GDNF|GJA1|GLI2|GPC1|HTT|TLX2|HES1|ITGA6|ISL1|ITGA1|ITGA2|JUN|KIF5C|MYLK|MYO10|NKX6-1|NTRK1|NR4A2|PFN2|PIK3CD|PLEK|PLS1|PLXNA2|POU3F2|POU4F3|PRKCD|PRKCZ|PTPRF|PTPRG|PTPRK|RREB1|SEMA3F|SFRP2|SGK1|SIAH2|SLIT3|SPOCK1|SPP1|SPTBN1|CNTN2|TBCE|NR2E…
GO:0009987_cellular process	0.00701404	3.50791e-05	1.536	1296.87	15796	1585	1427	1337	ABCA4|ACAA1|ACTA1|ACTN2|ADAR|ADCY3|ADCY5|ADD1|ADORA1|ADORA3|PARP1|ADRA1B|ADRA2C|AGER|AGL|AHSG|ALAS1|ALK|ALX3|AMD1|AMPD2|BIN1|ANK2|AOX1|APBB2|RHOA|ART3|ATP2B4|ALDH7A1|ATP5I|ATP6V1B1|ATP6V1G2|ATR|AUP1|AVPR1B|BCL6|BDH1|BGLAP|PRDM1|BMP6|BPHL|C2|C4A|C4B|CACNA1D|DDR1|CACNB4|CAMK4|CAMK2A|CANX|CASP8|CASR|RUNX3|CCND3|CCNG1|CD8A|CD80|TNFRSF8|SCARB2|CD38|CDK11B|CDC25C|CDH10|CDH12|CDH18|CDSN|CDX1|CKS1B|AP2M1…
GO:0018130_heterocycle biosynthetic process	0.00701404	3.48075e-05	1.27993	360.014	4385	12996	1427	424	ACTN2|ADCY3|ADCY5|ADORA3|PARP1|AGER|ALAS1|ALK|ALX3|AMD1|AMPD2|APBB2|ATP2B4|ATP5I|ATR|BCL6|PRDM1|BMP6|CAMK4|CAMK2A|RUNX3|CCND3|CD80|CD38|CDK11B|CDX1|CKS1B|CPOX|ATF6B|NKX2-5|CTNND2|DGKQ|DAXX|DCTD|DHFR|DNMT3A|DR1|DTYMK|DUSP1|DVL1|EBF1|ECM1|S1PR1|EEF1A1|CELSR2|EMX1|EN1|ENO1|EYA4|ESR1|ESRRG|F2R|FANCD2|EFEMP1|FGFR4|FHIT|FHL2|FOXE3|FOXD2|NR5A2|GABBR1|GBX2|GDNF|GFPT1|GJA1|GLI2|GLO1|GMDS|GNAI2|GRM2|GTF2E1…
GO:0023056_positive regulation of signaling	0.00742952	3.76273e-05	1.41694	135.877	1655	15726	1427	180	ADORA1|PARP1|ADRA1B|ADRA2C|AGER|ALK|RHOA|ATR|BMP6|CASP8|CASR|CD8A|CD80|CD38|CCR1|DAXX|DOK1|DVL1|ECE1|ECM1|EPHA4|EPHA8|EPHB2|F2R|FGF5|FGFR3|FGFR4|FGR|FLT4|GJA1|GNAI2|GPR17|GPR27|GPX1|GRB14|GRM4|HTT|UBE2K|HMGCR|HES1|HSPA1A|HSP90AB1|HTR6|IHH|IL4|ING2|INHA|INHBB|IRS1|ISL1|ITGA1|ITGA2|ITPKB|ITPR3|JUN|KISS1|MCL1|MST1R|MSX1|MSX2|MYD88|NKX6-1|NQO2|NOTCH2|NTRK1|OXTR|PIK3CD|PLA2G2A|PRKCD|PRKCE|PRKCZ|PSMB8|…
GO:2001141_regulation of RNA biosynthetic process	0.00766468	3.93036e-05	1.29483	302.953	3690	13691	1427	363	ACTN2|ADORA3|PARP1|AGER|ALK|ALX3|APBB2|ATP2B4|BCL6|PRDM1|BMP6|CAMK4|CAMK2A|RUNX3|CCND3|CD80|CD38|CDK11B|CDX1|CKS1B|ATF6B|NKX2-5|CTNND2|DGKQ|DAXX|DHFR|DNMT3A|DR1|DVL1|EBF1|ECM1|S1PR1|EEF1A1|CELSR2|EMX1|EN1|ENO1|EYA4|ESR1|ESRRG|F2R|FANCD2|EFEMP1|FHIT|FHL2|FOXE3|FOXD2|NR5A2|GBX2|GDNF|GLI2|GLO1|GTF2E1|GTF2H4|HIVEP1|HIVEP2|ZBTB48|HMGA1|HNRNPD|TLX2|HOXD1|HOXD3|HOXD4|HOXD8|HOXD9|HOXD10|HOXD11|HOXD12|HOX…
GO:0006355_regulation of transcription, DNA-templated	0.00801426	4.24302e-05	1.29425	300.408	3659	13722	1427	360	ADORA3|PARP1|AGER|ALK|ALX3|APBB2|ATP2B4|BCL6|PRDM1|BMP6|CAMK4|CAMK2A|RUNX3|CCND3|CD80|CD38|CDK11B|CDX1|CKS1B|ATF6B|NKX2-5|CTNND2|DGKQ|DAXX|DHFR|DNMT3A|DR1|DVL1|EBF1|ECM1|S1PR1|EEF1A1|CELSR2|EMX1|EN1|ENO1|EYA4|ESR1|ESRRG|F2R|FANCD2|EFEMP1|FHIT|FHL2|FOXE3|FOXD2|NR5A2|GBX2|GDNF|GLI2|GLO1|GTF2E1|GTF2H4|HIVEP1|HIVEP2|ZBTB48|HMGA1|HNRNPD|TLX2|HOXD1|HOXD3|HOXD4|HOXD8|HOXD9|HOXD10|HOXD11|HOXD12|HOXD13|HE…
GO:0034654_nucleobase-containing compound biosynthetic process	0.00801426	4.18892e-05	1.27781	355.005	4324	13057	1427	418	ACTN2|ADCY3|ADCY5|ADORA3|PARP1|AGER|ALK|ALX3|AMD1|AMPD2|APBB2|ATP2B4|ATP5I|ATR|BCL6|PRDM1|BMP6|CAMK4|CAMK2A|RUNX3|CCND3|CD80|CD38|CDK11B|CDX1|CKS1B|ATF6B|NKX2-5|CTNND2|DGKQ|DAXX|DCTD|DHFR|DNMT3A|DR1|DTYMK|DUSP1|DVL1|EBF1|ECM1|S1PR1|EEF1A1|CELSR2|EMX1|EN1|ENO1|EYA4|ESR1|ESRRG|F2R|FANCD2|EFEMP1|FGFR4|FHIT|FHL2|FOXE3|FOXD2|NR5A2|GABBR1|GBX2|GDNF|GFPT1|GJA1|GLI2|GLO1|GMDS|GNAI2|GRM2|GTF2E1|GTF2H4|GTF…
GO:1903506_regulation of nucleic acid-templated transcription	0.00801426	4.26182e-05	1.29349	302.296	3682	13699	1427	362	ACTN2|ADORA3|PARP1|AGER|ALK|ALX3|APBB2|ATP2B4|BCL6|PRDM1|BMP6|CAMK4|CAMK2A|RUNX3|CCND3|CD80|CD38|CDK11B|CDX1|CKS1B|ATF6B|NKX2-5|CTNND2|DGKQ|DAXX|DHFR|DNMT3A|DR1|DVL1|EBF1|ECM1|S1PR1|EEF1A1|CELSR2|EMX1|EN1|ENO1|EYA4|ESR1|ESRRG|F2R|FANCD2|EFEMP1|FHIT|FHL2|FOXE3|FOXD2|NR5A2|GBX2|GDNF|GLI2|GLO1|GTF2E1|GTF2H4|HIVEP1|HIVEP2|ZBTB48|HMGA1|HNRNPD|TLX2|HOXD1|HOXD3|HOXD4|HOXD8|HOXD9|HOXD10|HOXD11|HOXD12|HOX…
GO:0010647_positive regulation of cell communication	0.0117662	6.3315e-05	1.40315	135.385	1649	15732	1427	178	ADORA1|PARP1|ADRA1B|ADRA2C|AGER|ALK|RHOA|ATR|BMP6|CASP8|CASR|CD8A|CD80|CD38|CCR1|DAXX|DOK1|DVL1|ECM1|EPHA4|EPHA8|EPHB2|F2R|FGF5|FGFR3|FGFR4|FGR|FLT4|GJA1|GNAI2|GPR17|GPR27|GPX1|GRB14|GRM4|HTT|UBE2K|HMGCR|HES1|HSPA1A|HSP90AB1|HTR6|IHH|IL4|ING2|INHA|INHBB|IRS1|ISL1|ITGA1|ITGA2|ITPKB|ITPR3|JUN|KISS1|MCL1|MST1R|MSX1|MSX2|MYD88|NKX6-1|NQO2|NOTCH2|NTRK1|OXTR|PIK3CD|PLA2G2A|PRKCD|PRKCE|PRKCZ|PSMB8|PSMB9…
GO:0019367_fatty acid elongation, saturated fatty acid	0.0119961	6.75898e-05	28.045	0.574708	7	17374	1427	5	ELOVL4|ELOVL2|ELOVL5|ELOVL1|ELOVL6
GO:0019368_fatty acid elongation, unsaturated fatty acid	0.0119961	6.75898e-05	28.045	0.574708	7	17374	1427	5	ELOVL4|ELOVL2|ELOVL5|ELOVL1|ELOVL6
GO:0034625_fatty acid elongation, monounsaturated fatty acid	0.0119961	6.75898e-05	28.045	0.574708	7	17374	1427	5	ELOVL4|ELOVL2|ELOVL5|ELOVL1|ELOVL6
GO:0034626_fatty acid elongation, polyunsaturated fatty acid	0.0119961	6.75898e-05	28.045	0.574708	7	17374	1427	5	ELOVL4|ELOVL2|ELOVL5|ELOVL1|ELOVL6
GO:0048519_negative regulation of biological process	0.0132375	7.54223e-05	1.25297	423.149	5154	12227	1427	487	ACTN2|ADAR|ADD1|ADORA1|ADORA3|PARP1|ADRA2C|AGER|AHSG|BIN1|ANK2|APBB2|RHOA|ATP2B4|ATR|BCL6|PRDM1|BMP6|C4A|C4B|DDR1|CASP8|RUNX3|CCND3|TNFRSF8|CD38|CDC25C|CDSN|AP2M1|CLK2|CCR1|CNR2|COL6A3|CRMP1|CRP|NKX2-5|CTLA4|CTNNA2|DGKQ|DAXX|DHFR|DIAPH1|DNMT3A|DR1|DUSP1|DVL1|ECM1|S1PR1|EFNA3|EFNA5|EN1|ENO1|EPHA3|EPHA4|EPHB2|EYA4|ESR1|F2R|F12|FABP1|FAP|EFEMP1|FGF12|FGFR3|FHIT|FHL2|FOXE3|FLT4|GABBR1|GABRB2|GAK|GDNF…
GO:0035295_tube development	0.0135001	7.77735e-05	1.68005	47.3724	577	16804	1427	74	RHOA|PRDM1|DDR1|CASR|NKX2-5|DVL1|EN1|EPHA4|ESR1|FLT4|GBX2|GDNF|GLI2|HOXD11|HOXD13|HES1|ID2|IHH|ING2|ITGA6|LOX|MSX2|MYCN|NFIA|NOTCH4|OXTR|PAX7|PBX1|PITX2|PLXNA2|RYR2|VPS52|SFRP2|SIM1|SKI|T|TGFB2|THRB|TNF|WNT5A|WNT6|PAX8|CHRD|PROM1|BCL10|SLIT2|HAND2|ADAMTS2|ZEB2|SPRY1|BASP1|PDPN|SDCCAG8|LIAS|SSBP3|MTHFD1L|WWTR1|TRAF3IP1|KLHL3|HEYL|FOXP1|DLL1|SEMA4C|KIF26B|VANGL2|SHROOM3|IRX1|MIXL1|STK40|ATOH8|TRIM7…
GO:0007154_cell communication	0.0138175	8.04769e-05	1.23878	534.971	6516	10865	1427	602	ABCA4|ACTN2|ADAR|ADCY3|ADCY5|ADD1|ADORA1|ADORA3|PARP1|ADRA1B|ADRA2C|AGER|AHSG|ALK|ANK2|APBB2|RHOA|ATP2B4|ATP6V1B1|ATP6V1G2|ATR|AVPR1B|BCL6|BGLAP|PRDM1|BMP6|CACNA1D|DDR1|CACNB4|CAMK4|CAMK2A|CANX|CASP8|CASR|CCND3|CD8A|CD80|TNFRSF8|CD38|CDC25C|AP2M1|CLCN6|CLIC1|CCR1|CNGA3|CNR2|COL16A1|CPE|ATF6B|NKX2-5|CTLA4|CTNND2|DGKG|DGKQ|DAXX|DBN1|DOK1|DSP|DUSP1|DVL1|ECM1|S1PR1|EFNA3|EFNA5|CELSR3|CELSR2|ENO1|SLC2…
GO:0060284_regulation of cell development	0.0138876	8.17642e-05	1.55916	67.8976	827	16554	1427	99	ADD1|ADRA2C|AGER|BIN1|RHOA|BCL6|BMP6|TNFRSF8|SCARB2|CRMP1|NKX2-5|DBN1|DVL1|EFNA5|EMX1|EPHA3|EPHA4|EPHB2|GAK|GLI2|TLX2|HOXD3|HES1|ID2|ISL1|LTA|MEIS1|MYCN|NEUROG1|NKX6-1|NTRK1|PBX1|PLXNA2|POU3F2|PPARG|PROC|PTPRF|PTPRG|RREB1|SEMA3F|SFRP2|SKI|SPOCK1|SPP1|CNTN2|TERT|NR2E1|TNF|TP73|WNT5A|CXCR4|SOX14|CAMK1|SYNGAP1|CFLAR|PHOX2B|SEMA5A|GPR37L1|SLIT2|KDM4A|RAPGEF2|HDAC4|CUL7|ZEB2|KIAA0319|STK25|PDPN|TBR1|N…
GO:0045685_regulation of glial cell differentiation	0.0153965	9.16226e-05	3.67379	5.00817	61	17320	1427	15	AGER|BIN1|EPHA4|HES1|MYCN|NKX6-1|PPARG|CNTN2|NR2E1|TP73|CXCR4|GPR37L1|KDM4A|TNFRSF21|GSX2
GO:1901362_organic cyclic compound biosynthetic process	0.0162833	9.79307e-05	1.2578	372.493	4537	12844	1427	433	ACTN2|ADCY3|ADCY5|ADORA3|PARP1|AGER|ALAS1|ALK|ALX3|AMD1|AMPD2|APBB2|ATP2B4|ATP5I|ATR|BCL6|PRDM1|BMP6|CAMK4|CAMK2A|RUNX3|CCND3|CD80|CD38|CDK11B|CDX1|CKS1B|CPOX|ATF6B|NKX2-5|CTNND2|DGKQ|DAXX|DCTD|DHFR|DNMT3A|DR1|DTYMK|DUSP1|DVL1|EBF1|ECM1|S1PR1|EEF1A1|CELSR2|EMX1|EN1|ENO1|EYA4|ESR1|ESRRG|F2R|FANCD2|EFEMP1|FDPS|FGFR4|FHIT|FHL2|FOXE3|FOXD2|NR5A2|GABBR1|GBX2|GDNF|GFPT1|GJA1|GLI2|GLO1|GMDS|GNAI2|GRM2|G…
GO:1903522_regulation of blood circulation	0.0165146	0.000100367	1.98389	23.7272	289	17092	1427	43	ADORA1|ADORA3|ADRA1B|ADRA2C|ANK2|ATP2B4|AVPR1B|CACNA1D|CACNB4|CASR|CD38|NKX2-5|DSP|ECE1|F2R|GJA1|ITPR3|KCND3|KCNJ3|KCNK3|NPPA|NPR1|OXTR|PDE4B|PDE4D|RGS2|RYR2|S100A1|TACR1|TGFB2|THRB|UCN|CACNA2D2|NUP155|HDAC4|CORIN|KCNIP3|KCNIP1|GHRL|ZC3H12A|KCNIP4|RNF207|MIR26A1
GO:0010977_negative regulation of neuron projection development	0.017011	0.000105147	2.60705	10.5089	128	17253	1427	24	RHOA|TNFRSF8|CRMP1|EPHA4|EPHB2|GAK|TLX2|PTPRG|SEMA3F|SPOCK1|SPP1|WNT5A|SYNGAP1|SEMA5A|SLIT2|RAPGEF2|KIAA0319|NLGN1|NGEF|DNM3|BCL11A|SEMA3G|TRAK2|ITM2C
GO:0051252_regulation of RNA metabolic process	0.017011	0.000105538	1.2702	318.717	3882	13499	1427	376	ACTN2|ADORA3|PARP1|AGER|ALK|ALX3|APBB2|ATP2B4|BCL6|PRDM1|BMP6|CAMK4|CAMK2A|RUNX3|CCND3|CD80|CD38|CDK11B|CDX1|CKS1B|CLK2|ATF6B|NKX2-5|CTNND2|DGKQ|DAXX|DHFR|DNMT3A|DR1|DVL1|EBF1|ECM1|S1PR1|EEF1A1|CELSR2|EMX1|EN1|ENO1|EYA4|ESR1|ESRRG|F2R|FANCD2|EFEMP1|FHIT|FHL2|FOXE3|FOXD2|NR5A2|GBX2|GDNF|GLI2|GLO1|GTF2E1|GTF2H4|HIVEP1|HIVEP2|ZBTB48|HMGA1|HNRNPD|TLX2|HOXD1|HOXD3|HOXD4|HOXD8|HOXD9|HOXD10|HOXD11|HOXD1…
GO:0051253_negative regulation of RNA metabolic process	0.0173995	0.00010905	1.43637	105.993	1291	16090	1427	143	PARP1|BCL6|PRDM1|BMP6|RUNX3|CCND3|CD38|NKX2-5|DAXX|DNMT3A|DR1|EN1|ENO1|ESR1|FHL2|GDNF|GLI2|HIVEP1|HMGA1|HNRNPD|HOXD8|HOXD9|HES1|HSPA1A|ID2|ID3|IL4|ISL1|JARID2|JUN|MXD1|MSX1|MSX2|MYD88|NFIA|NKX6-1|NR4A2|PPARG|PTPRK|TRIM27|RING1|RREB1|S100A1|ATXN1|SFRP2|SIAH2|SKI|SLC11A1|SNCA|SP100|T|TAL1|TBX15|ZNF354A|TERT|TFAP2A|THRB|NR2E1|TNF|TP73|WNT5A|ZNF148|HIST1H4I|HIST1H2AI|HIST1H2AK|HIST1H2AL|HIST1H2AM|HIS…
GO:0045933_positive regulation of muscle contraction	0.0183156	0.000115951	4.06518	4.02296	49	17332	1427	13	ADRA1B|ENO1|F2R|ITGA2|NPPA|NPY2R|OXTR|RGS2|TACR1|UCN|NMU|GHRL|RNF207
GO:0060562_epithelial tube morphogenesis	0.0197064	0.000126003	1.92776	25.4514	310	17071	1427	45	RHOA|DDR1|CASR|NKX2-5|DVL1|EPHA4|ESR1|GBX2|GDNF|GLI2|HOXD11|HES1|IHH|MSX2|MYCN|NOTCH4|PBX1|PITX2|RYR2|SFRP2|SKI|T|TGFB2|TNF|WNT5A|WNT6|PAX8|BCL10|SLIT2|HAND2|ZEB2|SPRY1|LIAS|MTHFD1L|KLHL3|FOXP1|DLL1|SEMA4C|KIF26B|VANGL2|SHROOM3|IRX1|TRIM71|IRX2|RNF207
GO:0035239_tube morphogenesis	0.0199323	0.000128879	1.86815	28.4891	347	17034	1427	49	RHOA|DDR1|CASR|NKX2-5|DVL1|EPHA4|ESR1|GBX2|GDNF|GLI2|HOXD11|HOXD13|HES1|ID2|IHH|MSX2|MYCN|NOTCH4|PBX1|PITX2|RYR2|SFRP2|SKI|T|TGFB2|TNF|WNT5A|WNT6|PAX8|BCL10|SLIT2|HAND2|ZEB2|SPRY1|SDCCAG8|LIAS|MTHFD1L|KLHL3|FOXP1|DLL1|SEMA4C|KIF26B|VANGL2|SHROOM3|IRX1|ATOH8|TRIM71|IRX2|RNF207
GO:0048513_animal organ development	0.0199323	0.000129971	1.28049	276.27	3365	14016	1427	330	ACTA1|ACTN2|ADAR|ADD1|PARP1|AGER|AHSG|ALK|ALX3|ANK2|RHOA|ATP2B4|ATP6V1B1|BCL6|BGLAP|PRDM1|BMP6|DDR1|CAMK4|CASP8|CASR|RUNX3|CD8A|CD80|CDSN|CDX1|AP2M1|CCR1|COL6A3|COL8A1|COL9A1|COL11A2|CPE|CRYGD|NKX2-5|CTLA4|CTNNA2|DSP|DVL1|ECE1|ECM1|S1PR1|CELSR3|CELSR2|EMX1|EN1|SLC29A1|EPHA3|EPHA4|EPHB2|ESR1|FANCD2|EFEMP1|FGF12|FGFR3|FHL2|FOXE3|FLNB|FLT4|NR5A2|GABRB2|GBX2|GDNF|GJA1|GJA8|GLI2|GLO1|GPC1|GPD2|GPX1|GR…
GO:0006334_nucleosome assembly	0.0204024	0.000134328	2.44875	11.9868	146	17235	1427	26	DAXX|HIST1H1A|BRD2|HIST1H4I|HIST1H2BL|HIST1H2BN|HIST1H2BI|HIST1H2BO|HIST1H3A|HIST1H3C|HIST1H3E|HIST1H3I|HIST1H4A|HIST1H4F|HIST1H4K|HIST1H4L|HAT1|RUVBL1|HIST1H2BJ|H2AFY|CENPQ|HIST1H2BK|HIST3H2BB|NAP1L5|HIST2H2BF|HIST2H3D
GO:0048729_tissue morphogenesis	0.020705	0.000137631	1.62245	51.4774	627	16754	1427	78	ACTA1|RHOA|DDR1|CASR|AP2M1|NKX2-5|DSP|DVL1|S1PR1|CELSR3|CELSR2|EPHA4|ESR1|GBX2|GDNF|GLI2|TLX2|HOXD11|HOXD13|HES1|IHH|ISL1|ITGA2|MATN1|MSX1|MSX2|MYCN|MYLK|NOTCH4|PAX7|PBX1|PITX2|PSMB8|PSMB9|PSMD1|PSMD4|RREB1|RYR2|VPS52|SFRP2|SKI|T|TAL1|TFAP2A|TGFB2|TNF|WNT5A|WNT6|PAX8|FZD5|CHRD|BCL10|SLIT2|HAND2|ZEB2|SPRY1|UBE4B|PDPN|LIAS|MTHFD1L|TRAF3IP1|KLHL3|HEYL|FOXP1|DLL1|SEMA4C|KIF26B|AJAP1|VANGL2|SHROOM3|IR…
GO:0021953_central nervous system neuron differentiation	0.0207524	0.00013926	2.30988	14.0393	171	17210	1427	29	EMX1|EPHA4|EPHB2|GABRB1|GBX2|GLI2|HOXD10|HES1|ISL1|NKX6-1|NR4A2|PAX7|SFRP2|SPOCK1|TAL1|CNTN2|NR2E1|WNT5A|PHOX2B|SLIT2|RAPGEF2|ZEB2|TBR1|OTP|CHD5|ABT1|LHX4|GSX2|LHX8
GO:0010033_response to organic substance	0.0210195	0.000142384	1.28949	250.491	3051	14330	1427	302	ACTA1|ACTN2|ADAR|ADCY3|ADCY5|ADD1|PARP1|AGER|AGL|AHSG|ANK2|RHOA|ATP2B4|ATP6V1B1|ATP6V1G2|AUP1|AVPR1B|BGLAP|PRDM1|BMP6|C4B|CAMK2A|CANX|CASP8|CASR|RUNX3|CCND3|CD80|TNFRSF8|CD38|CLK2|CCR1|CNGA3|CNR2|COL16A1|CPOX|ATF6B|NKX2-5|DGKQ|DAXX|DHX15|DHFR|DIAPH1|DNMT3A|DTYMK|DUSP1|ECM1|EEF1A1|EFNA5|SLC29A1|EPHA3|EPHA4|EPHA8|ESR1|ESRRG|EXTL2|F2R|F12|FGF5|FGF12|FGFR3|FGFR4|FHL2|FLT4|NR5A2|GABRB1|GABRB2|GFPT1|GJ…
GO:0051130_positive regulation of cellular component organization	0.0223472	0.000152792	1.44389	97.2078	1184	16197	1427	132	ACTN2|ADD1|PARP1|AHSG|RHOA|ATR|BCL6|C2|C4A|C4B|CASP8|SCARB2|COL16A1|NKX2-5|DVL1|EFNA5|EPHA3|EPHA4|EPHB2|ESR1|GPX1|GTF2H4|HIST1H1A|HTT|HNRNPD|HES1|HSPA1A|HSPA1L|IL4|ING2|ISL1|ITGA2|JARID2|JUN|MSX1|MSX2|NEUROG1|NTRK1|OXTR|PAX7|PFN2|PHF1|PLEK|PPARG|PRKCD|PRKCE|TRIM27|RGS2|RPA2|RREB1|SLC11A1|SNCA|TACR1|TAL1|TCP1|TGFB2|THBS2|TNF|TP73|TPBG|WNT5A|ZBTB17|FZD5|NCK2|CAMK1|RUVBL1|CFLAR|SEMA5A|WDR46|SLIT2|NR…
GO:0006335_DNA replication-dependent nucleosome assembly	0.0232744	0.000162078	5.11067	2.62724	32	17349	1427	10	HIST1H4I|HIST1H3A|HIST1H3C|HIST1H3E|HIST1H3I|HIST1H4A|HIST1H4F|HIST1H4K|HIST1H4L|HAT1
GO:0034723_DNA replication-dependent nucleosome organization	0.0232744	0.000162078	5.11067	2.62724	32	17349	1427	10	HIST1H4I|HIST1H3A|HIST1H3C|HIST1H3E|HIST1H3I|HIST1H4A|HIST1H4F|HIST1H4K|HIST1H4L|HAT1
GO:0009790_embryo development	0.0235173	0.000165258	1.49157	78.4887	956	16425	1427	110	ADAR|ADD1|ALX3|ATP6V1B1|PRDM1|CASP8|CDX1|COL8A1|NKX2-5|DNMT3A|DUSP1|DVL1|ECE1|EMX1|EN1|EPHB2|EFEMP1|NR5A2|GBX2|GDNF|GLI2|TLX2|HOXD1|HOXD3|HOXD4|HOXD8|HOXD9|HOXD10|HOXD12|HOXD13|HES1|ID2|ID3|IHH|IL1RN|ISL1|ITGA2|MGAT1|MSX1|MSX2|MYCN|NEUROG1|NOTCH4|OTX1|PAX7|PBX1|PITX2|PLXNA2|POU4F3|RYR2|VPS52|SEMA3F|SFRP2|SKI|T|TAL1|TBX15|TFAP2A|TGFB2|TNF|TPO|UGDH|WNT5A|WNT6|WNT9A|ZIC1|ZBTB17|SLC30A1|PAX8|FZD5|CHR…
GO:0051173_positive regulation of nitrogen compound metabolic process	0.0237781	0.000168597	1.28983	241.788	2945	14436	1427	292	ADCY3|ADCY5|ADORA1|ADORA3|PARP1|ADRA1B|ADRA2C|AGER|ALK|RHOA|ATP2B4|ATR|BCL6|BMP6|CAMK4|CASP8|RUNX3|CCND3|CD80|TNFRSF8|CD38|CDX1|CKS1B|CCR1|ATF6B|NKX2-5|DGKQ|DAXX|DVL1|S1PR1|EFNA3|EFNA5|EN1|ENO1|EPHA4|EPHA8|EYA4|ESR1|ESRRG|F2R|F12|FGFR3|FGFR4|FHL2|FOXD2|FLT4|NR5A2|GBX2|GDNF|GJA1|GLI2|GNAI2|GRM4|UBE2K|ZBTB48|HMGCR|HMGA1|HNRNPD|TLX2|HOXD3|HOXD4|HOXD8|HOXD9|HOXD10|HOXD13|HES1|HSPA1A|HSP90AB1|ID2|IHH|…
GO:0060560_developmental growth involved in morphogenesis	0.0238151	0.000170366	2.14689	16.9949	207	17174	1427	33	DDR1|DVL1|S1PR1|EFNA5|EMX1|ESR1|HOXD13|NKX6-1|PLXNA2|POU4F3|PRKCZ|SEMA3F|SFRP2|SLIT3|SPP1|WNT5A|NRP2|SEMA5A|SLIT2|ZEB2|SPRY1|MACF1|LPAR3|CYFIP2|BCL11A|SEMA5B|KIF26B|SEMA3G|VANGL2|CPNE5|TMEM108|WDR36|BARHL2
GO:0044057_regulation of system process	0.0256043	0.000184787	1.66303	43.842	534	16847	1427	68	ADORA1|ADORA3|PARP1|ADRA1B|ADRA2C|ANK2|ATP2B4|AVPR1B|BMP6|CACNA1D|CACNB4|CASR|CD38|NKX2-5|DSP|ECE1|ENO1|F2R|FGF12|GJA1|GLRA1|INHA|INHBB|ITGA2|ITPR3|JARID2|KCND3|KCNJ3|KCNK3|KISS1|MYL5|NEUROG1|NPPA|NPR1|NPY2R|OXTR|PDE4B|PDE4D|PTGER3|RGS2|RYR2|S100A1|SGK1|TACR1|TGFB2|THRB|UCN|PHOX2B|CACNA2D2|HAND2|NUP155|HDAC4|CORIN|NMU|MGLL|NLGN1|TNFRSF21|LMCD1|TLX3|KCNIP3|KCNIP1|GHRL|ZC3H12A|KCNIP4|FAM19A4|GSX2|R…
GO:0010771_negative regulation of cell morphogenesis involved in differentiation	0.0260009	0.000189295	3.09041	6.48599	79	17302	1427	17	RHOA|EFNA5|EPHB2|TLX2|SEMA3F|SPP1|WNT5A|SYNGAP1|SEMA5A|SLIT2|RAPGEF2|NLGN1|NGEF|DNM3|RCC2|SEMA3G|TRAK2
GO:0016049_cell growth	0.0261743	0.000192214	1.69584	39.9012	486	16895	1427	63	APBB2|BCL6|DDR1|CD38|CDK11B|DVL1|EFNA5|EMX1|ENO1|GJA1|GNG4|HSPA1A|HSPG2|IGFBP2|MSX1|NKX6-1|NPPA|NPR1|PLXNA2|POU4F3|PPARG|PPP2CA|PRKCZ|SEMA3F|SFRP2|SGK1|SLIT3|SPOCK1|SPP1|TGFB2|LEFTY2|UCN|WNT5A|SORBS2|DGKD|NRP2|WISP3|SEMA5A|SLIT2|SOCS5|ZEB2|LEFTY1|ESM1|FGFR1OP|MACF1|LPAR3|SH3BP4|CYFIP2|IP6K2|BCL11A|SEMA5B|ATAD3A|SEMA3G|CPNE5|TNN|RRAGC|TMEM108|CDC73|SLC44A4|PSRC1|HTRA3|WDR36|BARHL2
GO:0010646_regulation of cell communication	0.026382	0.00019541	1.27117	277.748	3383	13998	1427	330	ACTN2|ADAR|ADCY5|ADORA1|PARP1|ADRA1B|ADRA2C|AGER|AHSG|ALK|ANK2|RHOA|ATP2B4|ATR|BCL6|PRDM1|BMP6|CACNA1D|CAMK2A|CASP8|CASR|CCND3|CD8A|CD80|CD38|CCR1|CNR2|NKX2-5|CTNND2|DGKQ|DAXX|DBN1|DOK1|DUSP1|DVL1|ECM1|EFNA5|ENO1|EPHA4|EPHA8|EPHB2|EYA4|ESR1|F2R|FANCD2|EFEMP1|FGF5|FGF12|FGFR3|FGFR4|FGR|FLT4|GDNF|GJA1|GLI2|GLRA1|GNAI2|GNG4|GPC1|GPR17|GPR27|GRK4|GRK6|GPX1|GRB14|GRM2|GRM4|GRM6|CXCL1|HTT|UBE2K|HMGCR|H…
GO:0048710_regulation of astrocyte differentiation	0.0265683	0.000198472	5.61918	2.21673	27	17354	1427	9	AGER|BIN1|EPHA4|HES1|MYCN|CNTN2|NR2E1|GPR37L1|KDM4A
GO:0045165_cell fate commitment	0.0270829	0.00020403	2.00272	20.7716	253	17128	1427	38	PRDM1|NKX2-5|GLI2|HOXD10|HES1|ID2|IHH|IL4|IRF4|ISL1|MCL1|NEUROG1|NKX6-1|NOTCH2|NOTCH4|PAX7|POU3F2|PPARG|SFRP2|TAL1|NR2E1|WNT5A|WNT6|WNT9A|PTCH2|PDPN|TBR1|MYT1L|CHD5|DLL1|TLX3|CYP26B1|DMRTA2|CDC73|WNT10A|GSX2|SH3PXD2B|BARHL2
GO:0023051_regulation of signaling	0.0274599	0.000210348	1.26809	281.771	3432	13949	1427	334	ACTN2|ADAR|ADCY5|ADORA1|PARP1|ADRA1B|ADRA2C|AGER|AHSG|ALK|ANK2|RHOA|ATP2B4|ATR|BCL6|PRDM1|BMP6|CACNA1D|CAMK2A|CASP8|CASR|CCND3|CD8A|CD80|CD38|CCR1|CNR2|NKX2-5|CTNND2|DGKQ|DAXX|DBN1|DOK1|DUSP1|DVL1|ECE1|ECM1|EFNA5|ENO1|EPHA4|EPHA8|EPHB2|EYA4|ESR1|F2R|FANCD2|EFEMP1|FGF5|FGF12|FGFR3|FGFR4|FGR|FLT4|GDNF|GJA1|GLI2|GLRA1|GNAI2|GNG4|GPC1|GPR17|GPR27|GRK4|GRK6|GPX1|GRB14|GRM2|GRM4|GRM6|CXCL1|HTT|UBE2K|HM…
GO:0034728_nucleosome organization	0.0274599	0.00021021	2.24603	14.3677	175	17206	1427	29	DAXX|HIST1H1A|HMGA1|BRD2|HIST1H4I|HIST1H2BL|HIST1H2BN|HIST1H2BI|HIST1H2BO|HIST1H3A|HIST1H3C|HIST1H3E|HIST1H3I|HIST1H4A|HIST1H4F|HIST1H4K|HIST1H4L|HAT1|RUVBL1|HIST1H2BJ|H2AFY|CHD5|CENPQ|HIST1H2BK|HIST3H2A|HIST3H2BB|NAP1L5|HIST2H2BF|HIST2H3D
GO:0031325_positive regulation of cellular metabolic process	0.0276542	0.000218839	1.27958	251.065	3058	14323	1427	301	ADCY3|ADCY5|ADORA1|ADORA3|PARP1|ADRA1B|ADRA2C|AGER|ALK|RHOA|ATP2B4|ATR|BCL6|BMP6|CAMK4|CASP8|RUNX3|CCND3|CD80|TNFRSF8|CD38|CDX1|CKS1B|CCR1|ATF6B|CRP|NKX2-5|DGKQ|DAXX|DVL1|ECE1|S1PR1|EFNA3|EFNA5|EN1|ENO1|EPHA4|EPHA8|EYA4|ESR1|ESRRG|F2R|F12|FABP1|FGFR3|FGFR4|FGR|FHL2|FOXD2|FLT4|NR5A2|GBX2|GDNF|GLI2|GNAI2|GRM4|HTT|UBE2K|ZBTB48|HMGCR|HMGA1|HNRNPD|TLX2|HOXD3|HOXD4|HOXD8|HOXD9|HOXD10|HOXD13|HES1|HSPA1A…
GO:0045814_negative regulation of gene expression, epigenetic	0.0276542	0.00021869	2.46391	11.0016	134	17247	1427	24	DNMT3A|HMGA1|JARID2|PHF1|TRIM27|HIST1H4I|HIST1H2AI|HIST1H2AK|HIST1H2AL|HIST1H2AM|HIST1H3A|HIST1H3C|HIST1H3E|HIST1H3I|HIST1H4A|HIST1H4F|HIST1H4K|HIST1H4L|HAT1|HIST1H2AG|H2AFY|SIRT5|HIST3H2A|HIST2H3D
GO:0048665_neuron fate specification	0.0276542	0.000215568	4.88816	2.70934	33	17348	1427	10	GLI2|HOXD10|ISL1|NKX6-1|POU3F2|MYT1L|DLL1|TLX3|DMRTA2|GSX2
GO:0050804_modulation of chemical synaptic transmission	0.0276542	0.000214454	1.89082	25.2872	308	17073	1427	44	ADORA1|AGER|CAMK2A|CD38|CNR2|DBN1|DVL1|EPHA4|EPHB2|F2R|GDNF|GNAI2|GRM2|GRM4|GRM6|ITPR3|KISS1|NPY2R|NTRK1|OXTR|PFN2|PRKCE|PRKCZ|SLC1A3|SLC6A1|SNCA|TACR1|CNTN2|NR2E1|UCN|SLC30A1|SYNGAP1|SQSTM1|CACNA2D2|NRXN1|RAPGEF2|CSPG5|CPLX2|NMU|SYNPO|NLGN1|RAB3GAP1|TMEM108|LRRTM1
GO:0048523_negative regulation of cellular process	0.0277131	0.000221059	1.23973	384.398	4682	12699	1427	442	ACTN2|ADAR|ADD1|ADORA1|ADORA3|PARP1|ADRA2C|AGER|AHSG|BIN1|ANK2|APBB2|RHOA|ATP2B4|ATR|BCL6|PRDM1|BMP6|C4A|C4B|DDR1|CASP8|RUNX3|CCND3|TNFRSF8|CD38|CDC25C|CDSN|CLK2|CNR2|COL6A3|CRMP1|CRP|NKX2-5|CTLA4|DGKQ|DAXX|DHFR|DIAPH1|DNMT3A|DR1|DUSP1|DVL1|ECM1|S1PR1|EFNA5|EN1|ENO1|EPHA3|EPHA4|EPHB2|EYA4|ESR1|F2R|FABP1|FAP|EFEMP1|FHIT|FHL2|FOXE3|FLT4|GABBR1|GABRB2|GAK|GDNF|GJA1|GLI2|GLO1|GLRA1|GNAI2|GNG4|GPC1|GR…
GO:0045893_positive regulation of transcription, DNA-templated	0.0289532	0.000234617	1.39213	116.584	1420	15961	1427	153	PARP1|BMP6|CAMK4|RUNX3|CD80|CD38|CDX1|CKS1B|ATF6B|NKX2-5|DVL1|S1PR1|EN1|ESR1|ESRRG|F2R|FHL2|FOXD2|NR5A2|GBX2|GDNF|GLI2|ZBTB48|HMGA1|HNRNPD|TLX2|HOXD3|HOXD4|HOXD8|HOXD9|HOXD10|HOXD13|HES1|ID2|IHH|IL4|ING2|ITGA6|IRF4|IRF6|ISL1|JUN|MEIS1|MSX1|MYCN|NEUROG1|NFIA|NKX6-1|NOTCH4|NPAS2|NR4A2|OTX1|PAX3|PAX7|PBX1|PCBP1|PITX2|PLAGL1|POU3F2|POU4F3|PPARG|RREB1|RXRB|SFRP2|SKI|SLC11A1|SP100|SPP1|T|TAL1|TERT|TFAP…
GO:1903508_positive regulation of nucleic acid-templated transcription	0.0289532	0.000234617	1.39213	116.584	1420	15961	1427	153	PARP1|BMP6|CAMK4|RUNX3|CD80|CD38|CDX1|CKS1B|ATF6B|NKX2-5|DVL1|S1PR1|EN1|ESR1|ESRRG|F2R|FHL2|FOXD2|NR5A2|GBX2|GDNF|GLI2|ZBTB48|HMGA1|HNRNPD|TLX2|HOXD3|HOXD4|HOXD8|HOXD9|HOXD10|HOXD13|HES1|ID2|IHH|IL4|ING2|ITGA6|IRF4|IRF6|ISL1|JUN|MEIS1|MSX1|MYCN|NEUROG1|NFIA|NKX6-1|NOTCH4|NPAS2|NR4A2|OTX1|PAX3|PAX7|PBX1|PCBP1|PITX2|PLAGL1|POU3F2|POU4F3|PPARG|RREB1|RXRB|SFRP2|SKI|SLC11A1|SP100|SPP1|T|TAL1|TERT|TFAP…
GO:1902680_positive regulation of RNA biosynthetic process	0.0296822	0.000242403	1.39093	116.666	1421	15960	1427	153	PARP1|BMP6|CAMK4|RUNX3|CD80|CD38|CDX1|CKS1B|ATF6B|NKX2-5|DVL1|S1PR1|EN1|ESR1|ESRRG|F2R|FHL2|FOXD2|NR5A2|GBX2|GDNF|GLI2|ZBTB48|HMGA1|HNRNPD|TLX2|HOXD3|HOXD4|HOXD8|HOXD9|HOXD10|HOXD13|HES1|ID2|IHH|IL4|ING2|ITGA6|IRF4|IRF6|ISL1|JUN|MEIS1|MSX1|MYCN|NEUROG1|NFIA|NKX6-1|NOTCH4|NPAS2|NR4A2|OTX1|PAX3|PAX7|PBX1|PCBP1|PITX2|PLAGL1|POU3F2|POU4F3|PPARG|RREB1|RXRB|SFRP2|SKI|SLC11A1|SP100|SPP1|T|TAL1|TERT|TFAP…
GO:0030326_embryonic limb morphogenesis	0.0298836	0.000247832	2.49664	10.4268	127	17254	1427	23	ALX3|ECE1|EN1|GLI2|HOXD9|HOXD10|HOXD12|HOXD13|IHH|MSX1|MSX2|MYCN|PBX1|PITX2|SFRP2|SKI|TFAP2A|TGFB2|WNT5A|WNT9A|HAND2|TRAF3IP1|CYP26B1
GO:0035113_embryonic appendage morphogenesis	0.0298836	0.000247832	2.49664	10.4268	127	17254	1427	23	ALX3|ECE1|EN1|GLI2|HOXD9|HOXD10|HOXD12|HOXD13|IHH|MSX1|MSX2|MYCN|PBX1|PITX2|SFRP2|SKI|TFAP2A|TGFB2|WNT5A|WNT9A|HAND2|TRAF3IP1|CYP26B1
GO:0007423_sensory organ development	0.0300172	0.00025084	1.65562	42.6926	520	16861	1427	66	ATP2B4|ATP6V1B1|PRDM1|BMP6|DDR1|COL8A1|CRYGD|DVL1|ECE1|EPHB2|EFEMP1|FOXE3|GABRB2|GBX2|GJA8|GLI2|GPD2|GRM6|HES1|IHH|IL4|JUN|KCNK3|MEIS1|MSX1|MYCN|NEUROG1|OTX1|PDE6B|PITX2|POU4F3|RHO|RING1|SKI|TFAP2A|TGFB2|NR2E1|WNT5A|WNT6|WNT9A|ZIC1|PAX8|FZD5|BCAR3|BFSP2|PROM1|PHOX2B|HAND2|CXCL14|ZEB2|RAB3GAP1|VAX2|LRIG1|TRAF3IP1|DLL1|CYP26B1|VANGL2|PRDM16|LPCAT1|WNT10A|SLC44A4|OLFM3|TMIE|NPHP4|SH3PXD2B|HCN1
GO:0048598_embryonic morphogenesis	0.0327228	0.000275521	1.61236	47.7008	581	16800	1427	72	ALX3|ATP6V1B1|COL8A1|NKX2-5|DUSP1|DVL1|ECE1|EN1|EPHB2|EFEMP1|GBX2|GDNF|GLI2|TLX2|HOXD3|HOXD4|HOXD9|HOXD10|HOXD12|HOXD13|HES1|ID2|IHH|IL1RN|ITGA2|MSX1|MSX2|MYCN|NEUROG1|OTX1|PBX1|PITX2|POU4F3|RYR2|SFRP2|SKI|T|TAL1|TBX15|TFAP2A|TGFB2|UGDH|WNT5A|WNT6|WNT9A|ZIC1|ZBTB17|PAX8|FZD5|CHRD|BCL10|HAND2|ZEB2|LIAS|VAX2|MTHFD1L|LRIG1|TRAF3IP1|DLL1|SEMA4C|CYP26B1|VANGL2|SHROOM3|IRX1|CDC73|SLC44A4|MIXL1|ATOH8|TR…
GO:0031345_negative regulation of cell projection organization	0.034371	0.000291574	2.31276	12.5615	153	17228	1427	26	RHOA|TNFRSF8|CRMP1|EPHA4|EPHB2|GAK|TLX2|PFN2|PRKCD|PTPRG|SEMA3F|SPOCK1|SPP1|WNT5A|SYNGAP1|SEMA5A|SLIT2|RAPGEF2|KIAA0319|NLGN1|NGEF|DNM3|BCL11A|SEMA3G|TRAK2|ITM2C
GO:0002087_regulation of respiratory gaseous exchange by neurological system process	0.0361714	0.000313717	9.61918	1.06731	13	17368	1427	6	ADORA1|GLRA1|PHOX2B|NLGN1|TLX3|GSX2
GO:0048934_peripheral nervous system neuron differentiation	0.0361714	0.000313717	9.61918	1.06731	13	17368	1427	6	RUNX3|HOXD9|HOXD10|ISL1|TBCE|HAND2
GO:0048935_peripheral nervous system neuron development	0.0361714	0.000313717	9.61918	1.06731	13	17368	1427	6	RUNX3|HOXD9|HOXD10|ISL1|TBCE|HAND2
GO:0045934_negative regulation of nucleobase-containing compound metabolic process	0.036409	0.000318084	1.37821	119.129	1451	15930	1427	155	PARP1|ATR|BCL6|PRDM1|BMP6|RUNX3|CCND3|CD38|NKX2-5|DAXX|DNMT3A|DR1|DUSP1|EN1|ENO1|ESR1|FHL2|GABBR1|GDNF|GJA1|GLI2|GNAI2|GRM2|HIVEP1|HMGA1|HNRNPD|HOXD8|HOXD9|HES1|HSPA1A|HTR1E|ID2|ID3|IL4|ISL1|JARID2|JUN|MXD1|MLH1|MSH3|MSX1|MSX2|MYD88|NFIA|NKX6-1|NPY2R|NR4A2|PPARG|PTPRK|TRIM27|RING1|RREB1|S100A1|ATXN1|SFRP2|SIAH2|SKI|SLC11A1|SNCA|SP100|T|TAL1|TBX15|ZNF354A|TERT|TFAP2A|THRB|NR2E1|TNF|TP73|WNT5A|ZNF1…
GO:0045892_negative regulation of transcription, DNA-templated	0.0374121	0.000329215	1.42037	95.4836	1163	16218	1427	128	PARP1|BCL6|PRDM1|BMP6|RUNX3|CCND3|CD38|NKX2-5|DAXX|DNMT3A|DR1|EN1|ENO1|ESR1|FHL2|GLI2|HIVEP1|HMGA1|HOXD8|HOXD9|HES1|HSPA1A|ID2|ID3|IL4|ISL1|JARID2|JUN|MXD1|MSX1|MSX2|NFIA|NKX6-1|NR4A2|PPARG|PTPRK|TRIM27|RING1|RREB1|S100A1|ATXN1|SFRP2|SKI|SNCA|SP100|T|TAL1|TBX15|ZNF354A|TFAP2A|THRB|NR2E1|TNF|TP73|WNT5A|ZNF148|HIST1H4I|HIST1H2AI|HIST1H2AK|HIST1H2AL|HIST1H2AM|HIST1H3A|HIST1H3C|HIST1H3E|HIST1H3I|HIST…
GO:0048663_neuron fate commitment	0.0376969	0.000334107	3.18717	5.58288	68	17313	1427	15	GLI2|HOXD10|HES1|ID2|IHH|ISL1|NKX6-1|PAX7|POU3F2|TBR1|MYT1L|DLL1|TLX3|DMRTA2|GSX2
GO:0002480_antigen processing and presentation of exogenous peptide antigen via MHC class I, TAP-independent	0.0385274	0.000352378	14.0207	0.73891	9	17372	1427	5	HLA-A|HLA-E|HLA-G|HLA-H|LNPEP
GO:0006805_xenobiotic metabolic process	0.0385274	0.000352072	2.62277	8.70272	106	17275	1427	20	BPHL|CRYZ|GSTA4|HSP90AB1|MGST2|NQO2|S100A12|NR1I2|UGT1A10|UGT1A8|UGT1A7|UGT1A6|UGT1A5|UGT1A9|UGT1A4|UGT1A3|CYP26B1|AHRR|NCEH1|CMBL
GO:0007350_blastoderm segmentation	0.0385274	0.000350829	7.14475	1.47782	18	17363	1427	7	HOXD8|NEUROG1|SEMA3F|T|WNT5A|FZD5|BASP1
GO:0007610_behavior	0.0385274	0.000353893	1.6018	47.2903	576	16805	1427	71	ADCY3|ADCY5|ADORA1|AGER|ALK|CAMK4|CASR|DVL1|EN1|EPHA4|EPHB2|FGF12|GAD1|GDNF|GJA1|GLRA1|GRM6|HTT|HMGCR|HOXD9|HOXD10|ID2|ITPR3|JUN|MEIS1|NEUROG1|NQO2|NPY2R|NTRK1|NR4A2|OXTR|PRKCE|PRKCZ|ATXN1|SGK1|SLC1A3|SLC6A1|SLC6A3|SNCA|TACR1|TAL1|CNTN2|TBCE|THBS4|THRB|NR2E1|UCN|VDAC1|ZIC1|B4GALT2|SYNGAP1|NRXN1|HAND2|TBR1|NMU|PARK7|SYNPO|NLGN1|HTRA2|GHRL|UBE2Q1|ANKH|ALS2|VWA1|ESPN|SGIP1|LYPD1|UBR3|NPHP4|LRRTM1|LH…
GO:0010941_regulation of cell death	0.0385274	0.000354975	1.35342	134.564	1639	15742	1427	172	ACTN2|ADAR|ADORA1|PARP1|ALK|ALX3|BIN1|APBB2|BCL6|BMP6|CAMK2A|CASP8|TNFRSF8|CD38|CDSN|NKX2-5|CTLA4|DAXX|DNMT3A|DUSP1|EN1|ENO1|EYA4|ESR1|F2R|FABP1|FAP|FHL2|FOXE3|FLT4|GABRB2|GDNF|GLI2|GLO1|GPX1|GRM4|HTT|HMGCR|HSPA1A|HSP90AB1|ID3|IHH|IL4|ING2|INHA|INHBB|ITGA6|ISL1|ITGA1|ITPKB|JUN|LRPAP1|LTA|MCL1|MSX1|MSX2|MYCN|MYD88|NQO2|NOTCH2|NPAS2|NTRK1|NR4A2|PAX7|PDCD1|PDCD2|SERPINB9|PIK3CD|PPARG|PRKCD|PRKCZ|PRO…
GO:0050808_synapse organization	0.0385274	0.000356103	1.93871	21.3463	260	17121	1427	38	CACNB4|CTNNA2|CTNND2|DVL1|EFNA5|EPHA4|EPHB2|F2R|GDNF|NFIA|NTRK1|OXTR|SNCA|CNTN2|THBS2|TPBG|WNT5A|FZD5|GNPAT|CAMK1|BSN|CACNA2D2|NRXN1|SYNPO|SLITRK3|NLGN1|NFASC|DNM3|GHRL|PCDHGC5|PCDHGC4|IGSF9|LRRN1|ALS2|RAB17|TMEM108|LRRTM1|AGRN
GO:0035107_appendage morphogenesis	0.0395716	0.00037327	2.31402	12.0689	147	17234	1427	25	ALX3|ECE1|EN1|GLI2|HOXD9|HOXD10|HOXD12|HOXD13|IHH|MSX1|MSX2|MYCN|PBX1|PITX2|PLXNA2|SFRP2|SKI|TFAP2A|TGFB2|WNT5A|WNT9A|ZNF141|HAND2|TRAF3IP1|CYP26B1
GO:0035108_limb morphogenesis	0.0395716	0.00037327	2.31402	12.0689	147	17234	1427	25	ALX3|ECE1|EN1|GLI2|HOXD9|HOXD10|HOXD12|HOXD13|IHH|MSX1|MSX2|MYCN|PBX1|PITX2|PLXNA2|SFRP2|SKI|TFAP2A|TGFB2|WNT5A|WNT9A|ZNF141|HAND2|TRAF3IP1|CYP26B1
GO:0048589_developmental growth	0.0395716	0.000372559	1.58759	49.0144	597	16784	1427	73	ADD1|DDR1|NKX2-5|DVL1|S1PR1|EFNA5|EMX1|EN1|ESR1|FGFR3|GJA1|GLI2|GPD2|GPX1|HOXD13|IHH|JARID2|MATN1|MEIS1|MSX2|NDUFS6|NKX6-1|NPPA|PAX7|PDE4D|PLS1|PLXNA2|POU3F2|POU4F3|PRKCZ|SEMA3F|SFRP2|SLC6A3|SLIT3|SPP1|TBCE|TEC|TGFB2|TP73|WNT5A|SORBS2|NRP2|CFLAR|SEMA5A|CACNA2D2|SLIT2|ZEB2|SPRY1|BASP1|WWC1|MACF1|LPAR3|WWTR1|CYFIP2|HTRA2|DLL1|GHRL|BCL11A|SEMA5B|KIF26B|SEMA3G|VANGL2|CPNE5|LGR6|TMEM108|TBL1XR1|STK40|…
GO:0070887_cellular response to chemical stimulus	0.039948	0.000379349	1.26969	244.661	2980	14401	1427	292	ACTA1|ACTN2|ADAR|ADCY3|ADCY5|ADD1|PARP1|AGER|AHSG|RHOA|ATP2B4|ATP6V1B1|ATP6V1G2|AVPR1B|BGLAP|PRDM1|BMP6|BPHL|CAMK2A|CANX|CASP8|CASR|CCND3|CD80|TNFRSF8|CCR1|CNR2|COL16A1|ATF6B|CRYGD|CRYZ|NKX2-5|DAXX|DHFR|DIAPH1|DNMT3A|DTYMK|DUSP1|ECM1|S1PR1|EEF1A1|EFNA5|ENO1|SLC29A1|EPHA3|EPHA4|EPHA8|ESR1|ESRRG|EXTL2|FABP1|FANCD2|FGF5|FGF12|FGFR3|FGFR4|FHL2|FLT4|NR5A2|GABRB1|GABRB2|GFPT1|GJA1|GLI2|GLRA1|GNAI2|GNG4…
GO:0006333_chromatin assembly or disassembly	0.0407656	0.000389694	2.11981	15.5992	190	17191	1427	30	DAXX|HIST1H1A|HMGA1|BRD2|TAL1|HIST1H4I|HIST1H2BL|HIST1H2BN|HIST1H2BI|HIST1H2BO|HIST1H3A|HIST1H3C|HIST1H3E|HIST1H3I|HIST1H4A|HIST1H4F|HIST1H4K|HIST1H4L|HAT1|RUVBL1|HIST1H2BJ|H2AFY|PADI2|CENPQ|HIST1H2BK|HIST3H2A|HIST3H2BB|NAP1L5|HIST2H2BF|HIST2H3D
GO:0009967_positive regulation of signal transduction	0.0409654	0.000394197	1.36389	124.137	1512	15869	1427	160	ADORA1|PARP1|ADRA1B|ADRA2C|AGER|ALK|RHOA|ATR|BMP6|CASP8|CD8A|CD80|CCR1|DAXX|DOK1|DVL1|ECM1|EPHA4|EPHA8|EPHB2|F2R|FGF5|FGFR3|FGFR4|FGR|FLT4|GJA1|GNAI2|GPR17|GPR27|GPX1|GRB14|GRM4|HTT|UBE2K|HMGCR|HES1|HSPA1A|HSP90AB1|HTR6|IHH|IL4|ING2|INHA|INHBB|IRS1|ISL1|ITGA1|ITPKB|JUN|KISS1|MCL1|MST1R|MSX1|MSX2|MYD88|NQO2|NOTCH2|NTRK1|PIK3CD|PLA2G2A|PRKCD|PRKCE|PRKCZ|PSMB8|PSMB9|PSMD1|PSMD4|RGL2|S100A4|S100A12|S…
GO:1902679_negative regulation of RNA biosynthetic process	0.041042	0.000397532	1.40521	99.4245	1211	16170	1427	132	PARP1|BCL6|PRDM1|BMP6|RUNX3|CCND3|CD38|NKX2-5|DAXX|DNMT3A|DR1|EN1|ENO1|ESR1|FHL2|GLI2|HIVEP1|HMGA1|HOXD8|HOXD9|HES1|HSPA1A|ID2|ID3|IL4|ISL1|JARID2|JUN|MXD1|MSX1|MSX2|NFIA|NKX6-1|NR4A2|PPARG|PTPRK|TRIM27|RING1|RREB1|S100A1|ATXN1|SFRP2|SIAH2|SKI|SNCA|SP100|T|TAL1|TBX15|ZNF354A|TFAP2A|THRB|NR2E1|TNF|TP73|WNT5A|ZNF148|HIST1H4I|HIST1H2AI|HIST1H2AK|HIST1H2AL|HIST1H2AM|HIST1H3A|HIST1H3C|HIST1H3E|HIST1H3…
GO:0051254_positive regulation of RNA metabolic process	0.0412879	0.000402529	1.36566	122.413	1491	15890	1427	158	PARP1|BMP6|CAMK4|RUNX3|CD80|CD38|CDX1|CKS1B|ATF6B|NKX2-5|DVL1|S1PR1|EN1|ESR1|ESRRG|F2R|FHL2|FOXD2|NR5A2|GBX2|GDNF|GLI2|ZBTB48|HMGA1|HNRNPD|TLX2|HOXD3|HOXD4|HOXD8|HOXD9|HOXD10|HOXD13|HES1|HSPA1A|ID2|IHH|IL4|ING2|ITGA6|IRF4|IRF6|ISL1|JUN|MEIS1|MSX1|MYCN|NEUROG1|NFIA|NKX6-1|NOTCH4|NPAS2|NR4A2|OTX1|PAX3|PAX7|PBX1|PCBP1|PITX2|PLAGL1|POU3F2|POU4F3|PPARG|RREB1|RXRB|SFRP2|SKI|SLC11A1|SP100|SPP1|T|TAL1|TE…
GO:0031497_chromatin assembly	0.0428263	0.000420238	2.21031	13.5467	165	17216	1427	27	DAXX|HIST1H1A|HMGA1|BRD2|HIST1H4I|HIST1H2BL|HIST1H2BN|HIST1H2BI|HIST1H2BO|HIST1H3A|HIST1H3C|HIST1H3E|HIST1H3I|HIST1H4A|HIST1H4F|HIST1H4K|HIST1H4L|HAT1|RUVBL1|HIST1H2BJ|H2AFY|CENPQ|HIST1H2BK|HIST3H2BB|NAP1L5|HIST2H2BF|HIST2H3D
GO:0021536_diencephalon development	0.0445199	0.000439675	2.9544	6.32179	77	17304	1427	16	GBX2|GLI2|HES1|ISL1|MSX1|NR4A2|OTX1|PITX2|POU3F2|SLC6A3|SRD5A2|WNT5A|SEMA5A|ZEB2|RAB3GAP1|OTP
GO:0016070_RNA metabolic process	0.0462425	0.000459614	1.22492	385.629	4697	12684	1427	440	ACTN2|ADAR|ADORA3|PARP1|AGER|ALK|ALX3|APBB2|ATP2B4|BCL6|PRDM1|BMP6|CAMK4|CAMK2A|RUNX3|CCND3|CD80|CD38|CDK11B|CDX1|CKS1B|CLK2|ATF6B|NKX2-5|CTNND2|DGKQ|DARS|DAXX|DHX15|DHFR|DNMT3A|DR1|DVL1|EBF1|ECM1|S1PR1|EEF1A1|CELSR2|EMX1|EN1|ENO1|EYA4|ESR1|ESRRG|F2R|FANCD2|EFEMP1|FHIT|FHL2|FOXE3|FOXD2|NR5A2|GBX2|GDNF|GLI2|GLO1|GTF2E1|GTF2H4|GTF3C2|HIVEP1|HIVEP2|ZBTB48|HMGA1|HNRNPD|TLX2|HOXD1|HOXD3|HOXD4|HOXD8|HO…
GO:0050919_negative chemotaxis	0.0471619	0.000471738	4.32333	2.95564	36	17345	1427	10	RHOA|EFNA5|SEMA3F|SLIT3|WNT5A|SEMA5A|SLIT2|SEMA5B|SEMA4C|SEMA3G
GO:0003016_respiratory system process	0.0480578	0.000483742	4.81553	2.46303	30	17351	1427	9	ADORA1|FLT4|GLRA1|PHOX2B|ECEL1|NLGN1|TLX3|STK40|GSX2
GO:0006464_cellular protein modification process	0.0487346	0.000505981	1.23291	337.272	4108	13273	1427	389	ACTN2|ADAR|ADCY3|ADCY5|ADORA1|PARP1|ADRA1B|ADRA2C|AGER|AHSG|ALK|RHOA|ART3|ATP2B4|ATR|BCL6|BGLAP|BMP6|C4A|DDR1|CAMK4|CAMK2A|CASR|RUNX3|CCND3|CCNG1|CD80|CDK11B|CDC25C|CKS1B|CLK2|CCR1|CPE|DGKQ|DAXX|DR1|DSP|DUSP1|DVL1|EEF1A1|EFNA5|CELSR3|EHHADH|EPHA3|EPHA4|EPHA8|EPHB2|EYA4|ESR1|F2R|F5|EFEMP1|FGF5|FGFR3|FGFR4|FGR|FKBP5|FLT4|GAD1|GAK|GALNT2|GDNF|GFPT1|GNAI2|GRK4|GRK6|GPX1|GRM4|GTF2H4|HTT|UBE2K|HMGCR|HE…
GO:0010975_regulation of neuron projection development	0.0487346	0.000497695	1.68844	34.893	425	16956	1427	55	RHOA|TNFRSF8|SCARB2|CRMP1|DBN1|DVL1|EFNA5|EPHA3|EPHA4|EPHB2|GAK|TLX2|NKX6-1|NTRK1|PLXNA2|POU3F2|PTPRF|PTPRG|SEMA3F|SFRP2|SPOCK1|SPP1|CNTN2|NR2E1|WNT5A|CAMK1|SYNGAP1|CFLAR|SEMA5A|SLIT2|RAPGEF2|CUL7|ZEB2|KIAA0319|STK25|TBR1|NLGN1|OBSL1|MACF1|LPAR3|NGEF|DNM3|PACSIN1|BCL11A|ULK4|TMEM30A|SEMA3G|CPNE5|RAB17|TRAK2|ITM2C|RTN4IP1|WDR36|BARHL2|TUBB2B
GO:0031344_regulation of cell projection organization	0.0487346	0.000500101	1.57918	47.865	583	16798	1427	71	RHOA|TNFRSF8|SCARB2|CRMP1|DBN1|DVL1|EFNA5|EPHA3|EPHA4|EPHB2|GAK|HTT|TLX2|ITGA2|MYO10|NKX6-1|NTRK1|PFN2|PLS1|PLXNA2|POU3F2|PRKCD|PTPRF|PTPRG|RREB1|SEMA3F|SFRP2|SPOCK1|SPP1|CNTN2|NR2E1|WNT5A|CAMK1|SYNGAP1|CFLAR|SEMA5A|SLIT2|RAPGEF2|CROCC|HDAC4|CUL7|ZEB2|KIAA0319|STK25|PDPN|TBR1|NLGN1|OBSL1|MACF1|LPAR3|NGEF|DNM3|PACSIN1|DCDC2|BCL11A|ULK4|TMEM30A|RCC2|SEMA3G|CPNE5|RAB17|TRAK2|ITM2C|ESPN|RTN4IP1|WDR36…
GO:0032879_regulation of localization	0.0487346	0.000498709	1.27665	216.829	2641	14740	1427	261	ACTN2|ADCY5|ADORA1|ADORA3|PARP1|ADRA2C|AGER|AHSG|BIN1|ANK2|RHOA|ATP2B4|BCL6|BMP6|C2|C4A|C4B|CACNA1D|CACNB4|CAMK2A|CASP8|CASR|CD38|AP2M1|CLCN6|CLIC1|CCR1|CRP|NKX2-5|DIAPH1|DSP|DVL1|ECM1|S1PR1|EFNA5|CELSR3|EPB41|EPHA3|EPHB2|F2R|FGF12|FGR|FLT4|GDNF|GJA1|GNAI2|GPR27|GRM6|CXCL1|HIST1H1A|HTT|HLA-E|HMGCR|HES1|HSPA1A|HSPA1L|HSP90AB1|IL4|INHA|INHBB|ITGA6|IRS1|ISL1|ITGA2|ITPR3|JUN|KCND3|KCNF1|KCNJ3|KCNJ9|K…
GO:0036211_protein modification process	0.0487346	0.000505981	1.23291	337.272	4108	13273	1427	389	ACTN2|ADAR|ADCY3|ADCY5|ADORA1|PARP1|ADRA1B|ADRA2C|AGER|AHSG|ALK|RHOA|ART3|ATP2B4|ATR|BCL6|BGLAP|BMP6|C4A|DDR1|CAMK4|CAMK2A|CASR|RUNX3|CCND3|CCNG1|CD80|CDK11B|CDC25C|CKS1B|CLK2|CCR1|CPE|DGKQ|DAXX|DR1|DSP|DUSP1|DVL1|EEF1A1|EFNA5|CELSR3|EHHADH|EPHA3|EPHA4|EPHA8|EPHB2|EYA4|ESR1|F2R|F5|EFEMP1|FGF5|FGFR3|FGFR4|FGR|FKBP5|FLT4|GAD1|GAK|GALNT2|GDNF|GFPT1|GNAI2|GRK4|GRK6|GPX1|GRM4|GTF2H4|HTT|UBE2K|HMGCR|HE…
GO:0009410_response to xenobiotic stimulus	0.0488085	0.000512128	2.46724	9.60583	117	17264	1427	21	BPHL|CRYZ|GPX1|GSTA4|HSP90AB1|MGST2|NQO2|S100A12|NR1I2|UGT1A10|UGT1A8|UGT1A7|UGT1A6|UGT1A5|UGT1A9|UGT1A4|UGT1A3|CYP26B1|AHRR|NCEH1|CMBL
GO:0044271_cellular nitrogen compound biosynthetic process	0.0488085	0.000512928	1.2169	421.754	5137	12244	1427	477	ACTN2|ADCY3|ADCY5|ADORA3|PARP1|AGER|ALAS1|ALK|ALX3|AMD1|AMPD2|APBB2|ATP2B4|ALDH7A1|ATP5I|ATR|BCL6|PRDM1|BMP6|CAMK4|CAMK2A|RUNX3|CCND3|CD80|CD38|CDK11B|CDX1|CKS1B|CPOX|ATF6B|NKX2-5|CTNND2|DGKQ|DARS|DAXX|DCTD|DHFR|DNMT3A|DR1|DTYMK|DUSP1|DVL1|EBF1|ECM1|S1PR1|EEF1A1|CELSR2|EMX1|EN1|ENO1|EYA4|ESR1|ESRRG|F2R|FANCD2|EFEMP1|FGFR4|FHIT|FHL2|FOXE3|FOXD2|NR5A2|GABBR1|GBX2|GDNF|GFPT1|GJA1|GLI2|GLO1|GMDS|GNAI…
GO:0009952_anterior/posterior pattern specification	0.0491743	0.000519886	2.0496	16.5844	202	17179	1427	31	CDX1|CELSR2|EN1|GBX2|GLI2|HOXD3|HOXD4|HOXD8|HOXD9|HOXD10|HOXD13|HES1|MSX1|MSX2|NEUROG1|OTX1|PBX1|PLXNA2|RING1|SFRP2|SKI|T|WNT5A|FZD5|TBX18|ZEB2|BASP1|SCMH1|SSBP3|DLL1|VANGL2

## Sheet: enrich.GO.CC
gene.set	fdr	p	odds	expected	numW	numB	numDrawn	numWdrawn	Wdrawn
GO:0044459_plasma membrane part	7.1975e-07	3.78418e-10	1.55098	214.194	2670	15841	1485	298	ABCA4|ADCY3|ADORA1|ADORA3|ADRA1B|ADRA2C|AGER|ALK|BIN1|ANK2|RHOA|ART3|ATP2B4|ATP6V1B1|AVPR1B|BTN1A1|CACNA1D|DDR1|CACNB4|CAMK2A|CASP8|CASR|CD8A|CD80|TNFRSF8|AP2M1|CCR1|CNGA3|CNR2|CPE|CTLA4|CTNNA2|DIAPH1|DSP|DVL1|ECE1|S1PR1|EEF1A1|EFNA3|EFNA5|SLC29A1|EPB41|EPHA3|EPHA4|EPHA8|EPHB2|F2R|FAP|FGFR3|FGFR4|FGR|FLT4|GABBR1|GABRB1|GABRB2|GABRD|GJA1|GJA4|GJA8|GLRA1|GNAI2|GNG4|GP9|GPC1|GPR6|GPR17|GPR25|GRK4|GR…
GO:0031226_intrinsic component of plasma membrane	2.90293e-06	3.0525e-09	1.64094	134.373	1675	16836	1485	200	ABCA4|ADCY3|ADORA1|ADORA3|ADRA1B|ADRA2C|AGER|ALK|ART3|ATP2B4|AVPR1B|BTN1A1|DDR1|CASR|CD8A|TNFRSF8|CCR1|CNGA3|CNR2|CTLA4|S1PR1|EFNA3|EFNA5|SLC29A1|EPHA3|EPHA4|EPHA8|EPHB2|F2R|FGFR3|FGFR4|FLT4|GABBR1|GABRB1|GABRB2|GABRD|GJA1|GJA4|GJA8|GLRA1|GP9|GPC1|GPR6|GPR17|GPR25|GRM2|GRM4|GRM6|HLA-DRA|HLA-H|HTR1E|HTR6|INSRR|ITGA6|IRS1|ITGA1|ITGA2|ITGA9|ITPR3|KCND3|KCNF1|KCNJ3|KCNJ9|KCNK3|KCNS3|LNPEP|MPL|MST1R|M…
GO:0005887_integral component of plasma membrane	5.6384e-06	8.89338e-09	1.62944	129.479	1614	16897	1485	192	ABCA4|ADCY3|ADORA1|ADORA3|ADRA1B|ADRA2C|AGER|ALK|ART3|ATP2B4|AVPR1B|BTN1A1|DDR1|CASR|CD8A|TNFRSF8|CCR1|CNGA3|CNR2|CTLA4|EFNA3|SLC29A1|EPHA3|EPHA4|EPHA8|EPHB2|F2R|FGFR3|FGFR4|FLT4|GABBR1|GABRB1|GABRB2|GABRD|GJA1|GJA4|GJA8|GLRA1|GP9|GPC1|GPR6|GPR17|GPR25|GRM2|GRM4|GRM6|HLA-DRA|HLA-H|HTR1E|HTR6|INSRR|ITGA6|IRS1|ITGA1|ITGA2|ITGA9|ITPR3|KCND3|KCNF1|KCNJ3|KCNJ9|KCNK3|KCNS3|LNPEP|MPL|MST1R|MUC4|NOTCH2|N…
GO:0000786_nucleosome	1.85696e-05	3.90527e-08	4.02374	8.42337	105	18406	1485	27	HIST1H1A|IRF4|HIST1H4I|HIST1H2AI|HIST1H2AK|HIST1H2AL|HIST1H2AM|HIST1H2BL|HIST1H2BN|HIST1H2BI|HIST1H2BO|HIST1H3A|HIST1H3C|HIST1H3E|HIST1H3I|HIST1H4A|HIST1H4F|HIST1H4K|HIST1H4L|HIST1H2AG|HIST1H2BJ|H2AFY|HIST1H2BK|HIST3H2A|HIST3H2BB|HIST2H2BF|HIST2H3D
GO:0044815_DNA packaging complex	6.29122e-05	1.65384e-07	3.69085	8.98493	112	18399	1485	27	HIST1H1A|IRF4|HIST1H4I|HIST1H2AI|HIST1H2AK|HIST1H2AL|HIST1H2AM|HIST1H2BL|HIST1H2BN|HIST1H2BI|HIST1H2BO|HIST1H3A|HIST1H3C|HIST1H3E|HIST1H3I|HIST1H4A|HIST1H4F|HIST1H4K|HIST1H4L|HIST1H2AG|HIST1H2BJ|H2AFY|HIST1H2BK|HIST3H2A|HIST3H2BB|HIST2H2BF|HIST2H3D
GO:0032993_protein-DNA complex	0.000478613	1.50982e-06	2.62723	16.1247	201	18310	1485	37	PARP1|ATF6B|NKX2-5|ESR1|GTF2E1|HIST1H1A|IRF4|RPA2|TERT|ZBTB17|HIST1H4I|HIST1H2AI|HIST1H2AK|HIST1H2AL|HIST1H2AM|HIST1H2BL|HIST1H2BN|HIST1H2BI|HIST1H2BO|HIST1H3A|HIST1H3C|HIST1H3E|HIST1H3I|HIST1H4A|HIST1H4F|HIST1H4K|HIST1H4L|HIST1H2AG|HIST1H2BJ|H2AFY|KCNIP3|SMARCAL1|HIST1H2BK|HIST3H2A|HIST3H2BB|HIST2H2BF|HIST2H3D
GO:0043005_neuron projection	0.00401939	1.47927e-05	1.54277	88.9668	1109	17402	1485	128	ABCA4|ACTN2|ADORA1|ADRA2C|BIN1|ANK2|APBB2|RHOA|ATP2B4|BGLAP|C4A|C4B|CAMK2A|CANX|CASP8|CASR|TNFRSF8|CNGA3|CNR2|CTNNA2|CTNND2|DBN1|DVL1|EPHA4|EPHA8|EPHB2|FLNB|GABBR1|GABRB1|GAD1|GLRA1|GNAI2|GRK4|GRM2|GRM6|HTT|INHA|ITGA1|ITGA2|KCND3|KIF5C|KISS1|MYO10|NTRK1|PDE4B|PDE6B|PFN2|PRKCZ|PTPRF|PTPRK|QDPR|RGS2|RGS12|RHO|S100A1|S100A4|SIAH2|SLC1A3|SLC6A1|SLC6A3|SNCA|SPOCK1|SPTBN1|SRD5A2|TACR1|CNTN2|TGFB2|UCN|P…
GO:0097458_neuron part	0.00413986	1.74126e-05	1.47635	113.114	1410	17101	1485	156	ABCA4|ACTN2|ADORA1|ADRA2C|BIN1|ANK2|APBB2|RHOA|ATP2B4|ATP6V1B1|BGLAP|C4A|C4B|CAMK2A|CANX|CASP8|CASR|TNFRSF8|CNGA3|CNR2|CPE|CTNNA2|CTNND2|DBN1|DVL1|EPB41|EPHA4|EPHA8|EPHB2|FLNB|GABBR1|GABRB1|GAD1|GLRA1|GNAI2|GRK4|GPX1|GRM2|GRM4|GRM6|HTT|AGFG1|INHA|ITGA1|ITGA2|ITPR3|KCND3|KIF5C|KISS1|MYO10|NEUROG1|NTRK1|PDE4B|PDE6B|PFN2|PRKCZ|PTPRF|PTPRK|QDPR|RGS2|RGS12|RHO|S100A1|S100A4|S100A5|SIAH2|SLC1A3|SLC6A1|…
GO:0000785_chromatin	0.00418609	1.9808e-05	1.80896	40.7531	508	18003	1485	68	RUNX3|DAXX|DFFB|DNMT3A|PHC2|ESR1|HIST1H1A|HMGN2|HMGA1|ING2|IRF4|JUN|MXD1|MYCN|RING1|RPA2|T|TAL1|TCP1|THRB|TP73|HIST1H4I|HIST1H2AI|HIST1H2AK|HIST1H2AL|HIST1H2AM|HIST1H2BL|HIST1H2BN|HIST1H2BI|HIST1H2BO|HIST1H3A|HIST1H3C|HIST1H3E|HIST1H3I|HIST1H4A|HIST1H4F|HIST1H4K|HIST1H4L|HAT1|RUVBL1|PHOX2B|HIST1H2AG|HIST1H2BJ|HAND2|H2AFY|KDM4A|ZEB2|EHMT2|PADI2|PARK7|TARDBP|CHD5|ANKRD17|FOXD3|HTRA2|PHF10|ARID1B|WD…
GO:0031982_vesicle	0.00499547	2.62643e-05	1.28621	345.278	4304	14207	1485	410	ACAA1|ACTA1|ACTN2|ADRA2C|AGL|AHSG|ALK|ANK2|AOX1|RHOA|ART3|ALDH7A1|ATP6V1B1|ATP6V1G2|AUP1|AVPR1B|BGLAP|BMP6|BPHL|C2|C4A|C4B|DDR1|CAMK4|CAMK2A|CANX|TNFRSF8|SCARB2|CD38|CDSN|AP2M1|CLCN6|CLIC1|COL6A3|COL8A1|CPE|CRP|CRYZ|CSRP1|CTLA4|DGKQ|DARS|DCTD|DIAPH1|DSP|DVL1|ECE1|ECM1|S1PR1|EEF1A1|ENO1|EPHA3|EPHA4|EPHA8|EXTL2|F2R|F5|F12|FABP1|FBLN2|EFEMP1|FGFR3|FGFR4|FGR|FHIT|FKBP5|FLNB|GABRB2|GAD1|GAK|GALE|GALNT…
GO:0042995_cell projection	0.00601348	3.47783e-05	1.39304	154.108	1921	16590	1485	201	ABCA4|ACTA1|ACTN2|ADCY3|ADCY5|ADORA1|ADRA2C|BIN1|ANK2|APBB2|RHOA|ATP2B4|ATP6V1B1|BGLAP|C4A|C4B|CAMK2A|CANX|CASP8|CASR|TNFRSF8|CNGA3|CNR2|CTNNA2|CTNND2|DBN1|DIAPH1|DVL1|EEF1A1|EPHA4|EPHA8|EPHB2|FAP|FGR|FLNB|GABBR1|GABRB1|GAD1|GLI2|GLRA1|GNAI2|GRK4|GRM2|GRM6|HTT|UBE2K|AGFG1|HSP90AB1|HTR6|INHA|ITGA6|ITGA1|ITGA2|KCND3|KIF5C|KISS1|MCC|MYO1B|MYLK|MYO7B|MYO10|NEDD9|NPY2R|NTRK1|OXTR|PDE4B|PDE6D|PDE6B|PFN…
GO:0120025_plasma membrane bounded cell projection	0.00633477	3.9967e-05	1.39659	148.251	1848	16663	1485	194	ABCA4|ACTA1|ACTN2|ADCY3|ADCY5|ADORA1|ADRA2C|BIN1|ANK2|APBB2|RHOA|ATP2B4|ATP6V1B1|BGLAP|C4A|C4B|CAMK2A|CANX|CASP8|CASR|TNFRSF8|CNGA3|CNR2|CTNNA2|CTNND2|DBN1|DIAPH1|DVL1|EEF1A1|EPHA4|EPHA8|EPHB2|FAP|FGR|FLNB|GABBR1|GABRB1|GAD1|GLI2|GLRA1|GNAI2|GRK4|GRM2|GRM6|HTT|UBE2K|HSP90AB1|HTR6|INHA|ITGA6|ITGA1|ITGA2|KCND3|KIF5C|KISS1|MCC|MYO1B|MYLK|MYO7B|MYO10|NEDD9|NPY2R|NTRK1|OXTR|PDE4B|PDE6D|PDE6B|PFN2|PLEK…
GO:0043227_membrane-bounded organelle	0.0111602	7.62791e-05	1.25207	993.316	12382	6129	1485	1059	ABCA4|ACAA1|ACTA1|ACTN2|ADAR|ADCY3|ADD1|ADORA1|PARP1|ADRA1B|ADRA2C|AGER|AGL|AHSG|ALAS1|ALK|ALX3|BIN1|ANK2|AOX1|APBB2|RHOA|ART3|ATP2B4|ALDH7A1|ATP5I|ATP6V1B1|ATP6V1G2|ATR|AUP1|AVPR1B|BCL6|BDH1|BGLAP|PRDM1|BMP6|BPHL|C2|C4A|C4B|DDR1|CAMK4|CAMK2A|CANX|CASP8|CASR|RUNX3|CCND3|CCNG1|TNFRSF8|SCARB2|CD38|CDK11B|CDC25C|CDSN|CDX1|CKS1B|AP2M1|CLCN6|CLIC1|CLK2|CNGA3|COL6A3|COL8A1|COL9A1|COL9A2|COL11A2|COL16A1…
GO:0030424_axon	0.0126182	9.28781e-05	1.8219	32.6506	407	18104	1485	55	ADORA1|ADRA2C|BIN1|C4A|C4B|CANX|CASR|CTNNA2|DVL1|EPHA4|EPHB2|GAD1|GRM2|HTT|ITGA2|NTRK1|PFN2|PRKCZ|PTPRK|SLC6A1|SLC6A3|SNCA|SPOCK1|SPTBN1|CNTN2|TGFB2|UCN|PRSS12|KCNAB2|SYNJ2|BSN|STX6|ATG7|CPLX2|NMU|PARK7|KIF21B|KIF1B|NFASC|N4BP3|LPAR3|DNM3|TNFRSF21|KCNIP3|GHRL|SEPT11|IGSF9|ALS2|TMEM108|TRAK2|TRIM46|CPEB4|NAV1|LRRTM1|HCN1
GO:0043226_organelle	0.0142985	0.000112764	1.26084	1071.21	13353	5158	1485	1132	ABCA4|ACAA1|ACTA1|ACTN2|ADAR|ADCY3|ADCY5|ADD1|ADORA1|PARP1|ADRA1B|ADRA2C|AGER|AGL|AHSG|ALAS1|ALK|ALX3|BIN1|ANK2|AOX1|APBB2|RHOA|ART3|ATP2B4|ALDH7A1|ATP5I|ATP6V1B1|ATP6V1G2|ATR|AUP1|AVPR1B|BCL6|BDH1|BGLAP|PRDM1|BMP6|BPHL|C2|C4A|C4B|CACNA1D|DDR1|CAMK4|CAMK2A|CANX|CASP8|CASR|RUNX3|CCND3|CCNG1|TNFRSF8|SCARB2|CD38|CDK11B|CDC25C|CDSN|CDX1|CKS1B|AP2M1|CLCN6|CLIC1|CLK2|CNGA3|COL6A3|COL8A1|COL9A1|COL9A2|C…
GO:0005623_cell	0.0160417	0.000151814	1.43198	1335.79	16651	1860	1485	1375	ABCA4|ACAA1|ACTA1|ACTN2|ADAR|ADCY3|ADCY5|ADD1|ADORA1|ADORA3|PARP1|ADRA1B|ADRA2C|AGER|AGL|AHSG|ALAS1|ALK|ALX3|AMD1|AMPD2|BIN1|ANK2|AOX1|APBB2|RHOA|ART3|ATP2B4|ALDH7A1|ATP5I|ATP6V1B1|ATP6V1G2|ATR|AUP1|AVPR1B|BCL6|BDH1|BGLAP|PRDM1|BMP6|BPHL|BTN1A1|C4A|C4B|CACNA1D|DDR1|CACNB4|CAMK4|CAMK2A|CANX|CASP8|CASR|RUNX3|CCND3|CCNG1|CD8A|CD80|TNFRSF8|SCARB2|CD38|CDK11B|CDC25C|CDH10|CDH12|CDH18|CDSN|CDX1|CKS1B|A…
GO:0036477_somatodendritic compartment	0.0160417	0.000144139	1.59319	55.5942	693	17818	1485	83	ACTN2|ADORA1|RHOA|BGLAP|C4A|C4B|CANX|CASR|CNGA3|CNR2|CPE|CTNND2|DBN1|DVL1|EPHA4|EPHB2|FLNB|GABBR1|GABRB1|GLRA1|GNAI2|GRK4|GRM2|GRM6|HTT|AGFG1|INHA|ITGA1|ITPR3|KCND3|KISS1|MYO10|NEUROG1|NTRK1|PDE4B|PRKCZ|PTPRF|PTPRK|RGS12|S100A5|SIAH2|SLC1A3|SLC6A3|SNCA|SRD5A2|SST|TACR1|CNTN2|TGFB2|UCN|PRSS12|PDLIM4|SYNGAP1|BSN|NRXN1|RAPGEF2|CPLX2|PDE10A|SYNPO|NLGN1|KIF21B|NFASC|N4BP3|ATP13A2|DNM3|FBXO2|KCNIP3|KCN…
GO:0044464_cell part	0.0160417	0.000141641	1.43036	1333.3	16620	1891	1485	1373	ABCA4|ACAA1|ACTA1|ACTN2|ADAR|ADCY3|ADCY5|ADD1|ADORA1|ADORA3|PARP1|ADRA1B|ADRA2C|AGER|AGL|AHSG|ALAS1|ALK|ALX3|AMD1|AMPD2|BIN1|ANK2|AOX1|APBB2|RHOA|ART3|ATP2B4|ALDH7A1|ATP5I|ATP6V1B1|ATP6V1G2|ATR|AUP1|AVPR1B|BCL6|BDH1|BGLAP|PRDM1|BMP6|BPHL|BTN1A1|C4A|C4B|CACNA1D|DDR1|CACNB4|CAMK4|CAMK2A|CANX|CASP8|CASR|RUNX3|CCND3|CCNG1|CD8A|CD80|TNFRSF8|SCARB2|CD38|CDK11B|CDC25C|CDH10|CDH12|CDH18|CDSN|CDX1|CKS1B|A…
GO:0043229_intracellular organelle	0.0172065	0.000171884	1.23612	990.749	12350	6161	1485	1053	ABCA4|ACAA1|ACTA1|ACTN2|ADAR|ADCY3|ADCY5|ADD1|ADORA1|PARP1|ADRA1B|ADRA2C|AGER|AGL|AHSG|ALAS1|ALX3|BIN1|ANK2|AOX1|APBB2|RHOA|ATP2B4|ALDH7A1|ATP5I|ATP6V1B1|ATP6V1G2|ATR|AUP1|AVPR1B|BCL6|BDH1|BGLAP|PRDM1|BPHL|C4A|CACNA1D|CAMK4|CAMK2A|CANX|CASP8|CASR|RUNX3|CCND3|CCNG1|TNFRSF8|SCARB2|CD38|CDK11B|CDC25C|CDX1|CKS1B|AP2M1|CLCN6|CLIC1|CLK2|COL6A3|COL8A1|COL9A1|COL9A2|COL11A2|COL16A1|CPE|CPOX|ATF6B|CRMP1|C…
GO:0071944_cell periphery	0.0188931	0.000198665	1.23036	436.25	5438	13073	1485	497	ABCA4|ACTN2|ADCY3|ADCY5|ADD1|ADORA1|ADORA3|ADRA1B|ADRA2C|AGER|ALK|BIN1|ANK2|RHOA|ART3|ATP2B4|ATP6V1B1|AVPR1B|BTN1A1|C4A|C4B|CACNA1D|DDR1|CACNB4|CAMK2A|CASP8|CASR|CCND3|CD8A|CD80|TNFRSF8|SCARB2|CD38|CDH10|CDH12|CDH18|CDSN|AP2M1|CLIC1|CCR1|CNGA3|CNR2|COL6A3|CPE|CTLA4|CTNNA2|DGKG|DGKQ|DBN1|DIAPH1|DSP|DVL1|ECE1|S1PR1|EEF1A1|EFNA3|EFNA5|CELSR3|CELSR2|ENO1|SLC29A1|EPB41|EPHA3|EPHA4|EPHA8|EPHB2|ESR1|F2R…
GO:0000788_nuclear nucleosome	0.0202273	0.00022333	4.37391	3.2089	40	18471	1485	11	IRF4|HIST1H4I|HIST1H3A|HIST1H3C|HIST1H3E|HIST1H3I|HIST1H4A|HIST1H4F|HIST1H4K|HIST1H4L|HIST3H2A
GO:0005886_plasma membrane	0.0243048	0.000281128	1.22507	428.148	5337	13174	1485	487	ABCA4|ACTN2|ADCY3|ADCY5|ADD1|ADORA1|ADORA3|ADRA1B|ADRA2C|AGER|ALK|BIN1|ANK2|RHOA|ART3|ATP2B4|ATP6V1B1|AVPR1B|BTN1A1|C4A|C4B|CACNA1D|DDR1|CACNB4|CAMK2A|CASP8|CASR|CCND3|CD8A|CD80|TNFRSF8|SCARB2|CD38|CDH10|CDH12|CDH18|CDSN|AP2M1|CLIC1|CCR1|CNGA3|CNR2|COL6A3|CPE|CTLA4|CTNNA2|DGKG|DGKQ|DBN1|DIAPH1|DSP|DVL1|ECE1|S1PR1|EEF1A1|EFNA3|EFNA5|CELSR3|CELSR2|ENO1|SLC29A1|EPB41|EPHA3|EPHA4|EPHA8|EPHB2|ESR1|F2R…
GO:0000790_nuclear chromatin	0.0268433	0.000327233	1.81927	27.2757	340	18171	1485	46	RUNX3|DAXX|DFFB|DNMT3A|ESR1|HIST1H1A|ING2|IRF4|JUN|MXD1|RING1|T|TAL1|TCP1|THRB|HIST1H4I|HIST1H2AI|HIST1H2AK|HIST1H2AL|HIST1H2AM|HIST1H3A|HIST1H3C|HIST1H3E|HIST1H3I|HIST1H4A|HIST1H4F|HIST1H4K|HIST1H4L|HAT1|RUVBL1|PHOX2B|HIST1H2AG|HAND2|H2AFY|ZEB2|EHMT2|TARDBP|CHD5|FOXD3|PHF10|ARID1B|INO80B|MIXL1|POLR3GL|HIST3H2A|ZFP57
GO:0031974_membrane-enclosed lumen	0.0268433	0.000366943	1.22359	405.284	5052	13459	1485	462	ACAA1|ACTN2|ADAR|ADD1|PARP1|AGER|AGL|AHSG|ALAS1|AOX1|ALDH7A1|ATR|BCL6|BDH1|BGLAP|PRDM1|C4A|CAMK4|CAMK2A|CANX|CASP8|RUNX3|CCND3|CCNG1|SCARB2|CDC25C|CKS1B|CLK2|COL6A3|COL8A1|COL9A1|COL9A2|COL11A2|COL16A1|CPOX|ATF6B|DGKQ|DAXX|DHX15|DFFB|DNMT3A|DR1|DTYMK|ECM1|S1PR1|PHC2|EEF1A1|EHHADH|EMX1|ESR1|ESRRG|F5|FABP1|FANCD2|FDPS|FGR|FHIT|FHL2|FKBP5|NR5A2|GLB1|GLI2|GNAI2|GPC1|GPX1|CXCL1|GTF2E1|GTF2H4|GTF3C2|HI…
GO:0043233_organelle lumen	0.0268433	0.000366943	1.22359	405.284	5052	13459	1485	462	ACAA1|ACTN2|ADAR|ADD1|PARP1|AGER|AGL|AHSG|ALAS1|AOX1|ALDH7A1|ATR|BCL6|BDH1|BGLAP|PRDM1|C4A|CAMK4|CAMK2A|CANX|CASP8|RUNX3|CCND3|CCNG1|SCARB2|CDC25C|CKS1B|CLK2|COL6A3|COL8A1|COL9A1|COL9A2|COL11A2|COL16A1|CPOX|ATF6B|DGKQ|DAXX|DHX15|DFFB|DNMT3A|DR1|DTYMK|ECM1|S1PR1|PHC2|EEF1A1|EHHADH|EMX1|ESR1|ESRRG|F5|FABP1|FANCD2|FDPS|FGR|FHIT|FHL2|FKBP5|NR5A2|GLB1|GLI2|GNAI2|GPC1|GPX1|CXCL1|GTF2E1|GTF2H4|GTF3C2|HI…
GO:0070013_intracellular organelle lumen	0.0268433	0.000366943	1.22359	405.284	5052	13459	1485	462	ACAA1|ACTN2|ADAR|ADD1|PARP1|AGER|AGL|AHSG|ALAS1|AOX1|ALDH7A1|ATR|BCL6|BDH1|BGLAP|PRDM1|C4A|CAMK4|CAMK2A|CANX|CASP8|RUNX3|CCND3|CCNG1|SCARB2|CDC25C|CKS1B|CLK2|COL6A3|COL8A1|COL9A1|COL9A2|COL11A2|COL16A1|CPOX|ATF6B|DGKQ|DAXX|DHX15|DFFB|DNMT3A|DR1|DTYMK|ECM1|S1PR1|PHC2|EEF1A1|EHHADH|EMX1|ESR1|ESRRG|F5|FABP1|FANCD2|FDPS|FGR|FHIT|FHL2|FKBP5|NR5A2|GLB1|GLI2|GNAI2|GPC1|GPX1|CXCL1|GTF2E1|GTF2H4|GTF3C2|HI…
GO:0031430_M band	0.0362937	0.000534292	4.71286	2.4869	31	18480	1485	9	ANK2|ENO1|FHL2|PPP2R5A|S100A1|SPTBN1|OBSL1|OBSCN|CMYA5
GO:0042825_TAP complex	0.0362937	0.000515326	Inf	0.240668	3	18508	1485	3	TAP1|TAP2|TAPBP

## Sheet: enrich.GO.MF
gene.set	fdr	p	odds	expected	numW	numB	numDrawn	numWdrawn	Wdrawn
GO:0005509_calcium ion binding	2.72303e-09	5.91448e-13	2.29337	56.6426	685	16669	1435	113	ACTN2|BGLAP|CANX|CASR|CDH10|CDH12|CDH18|CRP|DGKG|CELSR3|CELSR2|MEGF6|F12|FBLN2|EFEMP1|GPD2|HPCAL1|HSPG2|IHH|ITPR3|LETM1|MATN1|MYL5|NOTCH2|NOTCH4|PCDHGC3|PLA2G2A|PLS1|PROC|RYR2|S100A1|S100A2|S100A4|S100A5|S100A12|S100A13|SLIT3|SNCA|SPOCK1|THBS2|THBS4|TCHH|CLEC3B|TPO|DYSF|PCDHGB4|SLIT2|NRXN1|PLCH2|RAPGEF2|PCDHGA8|PCDHA9|PDCD6|PADI2|STAB1|MACF1|PCDHGA12|PKD2L2|DLL1|KCNIP3|KCNIP1|SDF4|PCDH12|FKBP7|PA…
GO:0043167_ion binding	9.66632e-08	4.1991e-11	1.4436	506.475	6125	11229	1435	621	ABCA4|ACTA1|ACTN2|ADAR|ADCY3|ADCY5|PARP1|AGER|ALAS1|ALK|AMD1|AMPD2|AOX1|RHOA|ATP2B4|ATP6V1B1|ATR|BCL6|BGLAP|PRDM1|C2|CACNA1D|DDR1|CAMK4|CAMK2A|CANX|CASR|RUNX3|CDK11B|CDH10|CDH12|CDH18|CLCN6|CLK2|CNGA3|COL9A1|COL11A2|CPE|CRP|CRYZ|CSRP1|DGKG|DGKQ|DARS|DCTD|DHX15|DHFR|DNMT3A|DPYD|DTYMK|EBF1|ECE1|PHC2|EEF1A1|CELSR3|CELSR2|MEGF6|ENO1|EPB41|EPHA3|EPHA4|EPHA8|EPHB2|EYA4|ESR1|ESRRG|EXTL2|F5|F12|FABP1|FBL…
GO:0046872_metal ion binding	2.62759e-05	1.71215e-08	1.40957	340.352	4116	13238	1435	428	ACTN2|ADAR|ADCY3|ADCY5|PARP1|AMPD2|AOX1|ATP2B4|BCL6|BGLAP|PRDM1|C2|CACNA1D|DDR1|CAMK2A|CANX|CASR|CDH10|CDH12|CDH18|COL9A1|COL11A2|CPE|CRP|CRYZ|CSRP1|DGKG|DGKQ|DCTD|DNMT3A|DPYD|EBF1|ECE1|PHC2|CELSR3|CELSR2|MEGF6|ENO1|EYA4|ESR1|ESRRG|EXTL2|F5|F12|FBLN2|EFEMP1|FDPS|FHL2|NR5A2|GALNT2|GLI2|GLO1|GLRA1|GNAI2|GPC1|GPD2|GTF2E1|GUCY1B3|HIVEP1|HIVEP2|ZBTB48|HPCAL1|AGFG1|HSPG2|IHH|ING2|ITGA6|ISL1|ITGA1|ITGA2…
GO:0043169_cation binding	0.000113068	9.82344e-08	1.3805	347.876	4207	13147	1435	431	ACTN2|ADAR|ADCY3|ADCY5|PARP1|AMD1|AMPD2|AOX1|ATP2B4|BCL6|BGLAP|PRDM1|C2|CACNA1D|DDR1|CAMK2A|CANX|CASR|CDH10|CDH12|CDH18|COL9A1|COL11A2|CPE|CRP|CRYZ|CSRP1|DGKG|DGKQ|DCTD|DNMT3A|DPYD|EBF1|ECE1|PHC2|CELSR3|CELSR2|MEGF6|ENO1|EYA4|ESR1|ESRRG|EXTL2|F5|F12|FBLN2|EFEMP1|FDPS|FHL2|NR5A2|GALNT2|GLI2|GLO1|GLRA1|GNAI2|GPC1|GPD2|GTF2E1|GUCY1B3|HIVEP1|HIVEP2|ZBTB48|HPCAL1|AGFG1|HSPG2|HTR1E|IHH|ING2|ITGA6|ISL1|…
GO:0046983_protein dimerization activity	0.000198044	2.15078e-07	1.62591	103.362	1250	16104	1435	154	ACTN2|ADCY5|ADD1|ADORA1|ADRA1B|ADRA2C|AOX1|BMP6|CAMK2A|CASR|CD8A|CDSN|CPOX|NKX2-5|DAXX|DPYD|DR1|ECE1|ENO1|FAP|FLT4|GAD1|GALE|GDNF|GRB14|GRM6|GSTA4|HLA-G|HMGCR|HES1|HSP90AB1|ID2|ID3|INHA|INHBB|ITGA2|JUN|KCNK3|MXD1|MCL1|MEIS1|MYCN|NEUROG1|NQO2|NOTCH4|NPAS2|NTRK1|NR4A2|PBX1|PLEK|PPARG|PPP2CA|QDPR|S100A1|S100A5|S100A13|SIM1|SLC11A1|SLC22A1|SP100|SRM|STK10|TAL1|TAP1|TBX15|TERT|TFAP2A|TGFB2|TPD52L1|TTK…
GO:0005488_binding	0.000254905	3.32195e-07	1.53128	1222.98	14790	2564	1435	1285	ABCA4|ACAA1|ACTA1|ACTN2|ADAR|ADCY3|ADCY5|ADD1|ADORA1|PARP1|ADRA1B|ADRA2C|AGER|AGL|ALAS1|ALK|ALX3|AMD1|AMPD2|BIN1|ANK2|AOX1|APBB2|RHOA|ATP2B4|ALDH7A1|ATP6V1B1|ATR|AUP1|AVPR1B|BCL6|BGLAP|PRDM1|BMP6|C2|C4A|C4B|CACNA1D|DDR1|CACNB4|CAMK4|CAMK2A|CANX|CASP8|CASR|RUNX3|CCND3|CCNG1|CD8A|CD80|TNFRSF8|SCARB2|CD38|CDK11B|CDC25C|CDH10|CDH12|CDH18|CDSN|CDX1|CKS1B|AP2M1|CLCN6|CLIC1|CLK2|CCR1|CNGA3|COL8A1|COL9A1…
GO:0000981_RNA polymerase II transcription factor activity, sequence-specific DNA binding	0.000323887	4.92443e-07	1.77934	63.3404	766	16588	1435	103	PARP1|BCL6|PRDM1|RUNX3|CDX1|ATF6B|NKX2-5|EN1|ENO1|ESR1|ESRRG|FOXE3|FOXD2|NR5A2|GBX2|GLI2|HIVEP1|HMGA1|TLX2|HOXD3|HOXD4|HOXD8|HOXD9|HOXD10|HOXD13|HES1|IRF4|IRF6|ISL1|JARID2|JUN|MXD1|MEIS1|MSX1|MSX2|MYCN|NFIA|NKX6-1|NR4A2|OTX1|PAX7|PBX1|PCBP1|PITX2|PLAGL1|POU3F2|POU4F3|PPARG|RREB1|RXRB|SIM1|T|TAL1|TBX15|TFAP2A|THRB|NR2E1|TP73|ZIC1|ZNF76|ZNF148|ZBTB17|PRDM2|PAX8|SOX14|KLF11|KLF7|NR1I2|PHOX2B|LRRFIP1…
GO:0046982_protein heterodimerization activity	0.000473052	8.21984e-07	1.96825	40.9315	495	16859	1435	73	ADCY5|ADD1|ADORA1|ADRA1B|ADRA2C|BMP6|NKX2-5|DAXX|DR1|GAD1|INHA|ITGA2|JUN|KCNK3|MCL1|MEIS1|NOTCH4|NR4A2|PBX1|PPARG|PPP2CA|SIM1|TAL1|TBX15|TGFB2|TPD52L1|HIST1H4I|HIST1H2AI|HIST1H2AK|HIST1H2AL|HIST1H2AM|HIST1H2BL|HIST1H2BN|HIST1H2BI|HIST1H2BO|HIST1H3A|HIST1H3C|HIST1H3E|HIST1H3I|HIST1H4A|HIST1H4F|HIST1H4K|HIST1H4L|SOX14|DGKD|HIST1H2AG|HIST1H2BJ|TBX18|HAND2|H2AFY|TLR6|KATNA1|HEYL|UGT1A10|UGT1A8|UGT1A7…
GO:0004714_transmembrane receptor protein tyrosine kinase activity	0.000820961	1.60483e-06	4.58315	5.12677	62	17292	1435	18	ALK|DDR1|EFNA3|EPHA3|EPHA4|EPHA8|EPHB2|EFEMP1|FGFR3|FGFR4|FLT4|INSRR|MST1R|NTRK1|TRIM27|NRP2|FGFRL1|EPHA6
GO:0043565_sequence-specific DNA binding	0.00204331	4.43812e-06	1.59399	86.0802	1041	16313	1435	127	PARP1|ALX3|BCL6|PRDM1|RUNX3|CDX1|ATF6B|NKX2-5|EMX1|EN1|ENO1|ESR1|ESRRG|FOXE3|FOXD2|NR5A2|GBX2|GLI2|GTF2E1|HIVEP1|HIVEP2|ZBTB48|HMGA1|HNRNPD|TLX2|HOXD1|HOXD3|HOXD4|HOXD8|HOXD9|HOXD10|HOXD11|HOXD12|HOXD13|HES1|IRF4|IRF6|ISL1|JARID2|JUN|MXD1|MEIS1|MSX1|MSX2|MYCN|NEUROG1|NFIA|NKX6-1|NR4A2|OTX1|PAX3|PAX7|PBX1|PCBP1|PITX2|PLAGL1|POU3F2|POU4F3|PPARG|RPA2|RREB1|RXRB|T|TAL1|TBX15|TERT|TFAP2A|THRB|NR2E1|TP…
GO:0001228_transcriptional activator activity, RNA polymerase II transcription regulatory region sequence-specific binding	0.00445225	1.06374e-05	1.93542	33.9855	411	16943	1435	60	PARP1|CDX1|ATF6B|NKX2-5|ESR1|ESRRG|FOXD2|NR5A2|GBX2|GLI2|HMGA1|TLX2|HOXD3|HOXD4|HOXD8|HOXD10|HOXD13|IRF4|IRF6|ISL1|JUN|MEIS1|MSX1|MYCN|NFIA|NR4A2|OTX1|PBX1|PITX2|PLAGL1|POU3F2|POU4F3|RREB1|RXRB|TFAP2A|NR2E1|TP73|ZIC1|ZNF76|ZBTB17|PRDM2|PAX8|KLF7|NR1I2|PHOX2B|HAND2|TBPL1|ZEB2|FOXJ3|ZNF292|CAMTA1|TARDBP|SSBP3|HEYL|KLF15|ZBTB7B|MIXL1|LHX4|BARHL2|FIGLA
GO:0019199_transmembrane receptor protein kinase activity	0.00663385	1.72907e-05	3.54662	6.5325	79	17275	1435	19	ALK|DDR1|EFNA3|EPHA3|EPHA4|EPHA8|EPHB2|EFEMP1|FGFR3|FGFR4|FLT4|INSRR|MST1R|NTRK1|TRIM27|NRP2|FGFRL1|ACVR1C|EPHA6
GO:0042802_identical protein binding	0.0136433	3.85235e-05	1.42013	133.296	1612	15742	1435	177	ACTN2|ADD1|PARP1|ADRA2C|AGER|ALAS1|ALK|BIN1|AOX1|BCL6|CAMK2A|CASP8|CASR|CD8A|CD38|CDSN|CLK2|CPOX|CRP|NKX2-5|CTNNA2|DCTD|DFFB|DNMT3A|DPYD|DVL1|ECE1|PHC2|ENO1|EPHA4|EPHB2|ESR1|FAP|FGFR3|FHIT|FHL2|FLNB|FLT4|GALE|GDNF|GMDS|GRB14|GRM6|GSTA4|GSTM5|HTT|ZBTB48|HLA-G|HMGCR|HES1|HSP90AB1|INHBB|JUN|KCNK3|MARCKS|MAT2A|MCL1|MCM6|MYD88|NEUROG1|NQO2|NTRK1|NR4A2|PCSK1|PLEK|PLXNA2|POU3F2|PPARG|PSMD4|PTPRG|QDPR|TR…
GO:0009922_fatty acid elongase activity	0.0178987	6.99774e-05	27.8269	0.578829	7	17347	1435	5	ELOVL4|ELOVL2|ELOVL5|ELOVL1|ELOVL6
GO:0102336_3-oxo-arachidoyl-CoA synthase activity	0.0178987	6.99774e-05	27.8269	0.578829	7	17347	1435	5	ELOVL4|ELOVL2|ELOVL5|ELOVL1|ELOVL6
GO:0102337_3-oxo-cerotoyl-CoA synthase activity	0.0178987	6.99774e-05	27.8269	0.578829	7	17347	1435	5	ELOVL4|ELOVL2|ELOVL5|ELOVL1|ELOVL6
GO:0102338_3-oxo-lignoceronyl-CoA synthase activity	0.0178987	6.99774e-05	27.8269	0.578829	7	17347	1435	5	ELOVL4|ELOVL2|ELOVL5|ELOVL1|ELOVL6
GO:0102756_very-long-chain 3-ketoacyl-CoA synthase activity	0.0178987	6.99774e-05	27.8269	0.578829	7	17347	1435	5	ELOVL4|ELOVL2|ELOVL5|ELOVL1|ELOVL6
GO:0005515_protein binding	0.0190356	7.8557e-05	1.25341	939.936	11367	5987	1435	1005	ACAA1|ACTA1|ACTN2|ADAR|ADCY3|ADCY5|ADD1|ADORA1|PARP1|ADRA1B|ADRA2C|AGER|AGL|ALAS1|ALK|AMPD2|BIN1|ANK2|AOX1|APBB2|RHOA|ATP2B4|ALDH7A1|ATP6V1B1|ATR|AUP1|AVPR1B|BCL6|PRDM1|BMP6|C2|C4A|C4B|CACNA1D|DDR1|CACNB4|CAMK4|CAMK2A|CANX|CASP8|CASR|RUNX3|CCND3|CCNG1|CD8A|CD80|TNFRSF8|SCARB2|CD38|CDK11B|CDC25C|CDSN|CDX1|CKS1B|AP2M1|CLIC1|CLK2|CCR1|CNGA3|COL8A1|COL11A2|COL16A1|CPE|CPOX|ATF6B|CRMP1|CRP|CRYGD|NKX2-…
GO:0016813_hydrolase activity, acting on carbon-nitrogen (but not peptide) bonds, in linear amidines	0.0233779	0.000101555	13.3638	0.909589	11	17343	1435	6	PADI2|DDAH2|DDAH1|PADI3|ALLC|AGMAT
GO:0000975_regulatory region DNA binding	0.0378228	0.000173067	1.51926	70.121	848	16506	1435	100	PARP1|BCL6|PRDM1|RUNX3|CDX1|ATF6B|NKX2-5|EN1|ENO1|ESR1|ESRRG|NR5A2|GBX2|GLI2|HIVEP1|HIVEP2|ZBTB48|HMGA1|HOXD3|HOXD4|HOXD8|HOXD9|HOXD10|HOXD13|HES1|IRF4|IRF6|ISL1|JARID2|JUN|MXD1|MEIS1|MSX1|MSX2|MYCN|NEUROG1|NFIA|NKX6-1|NPAS2|NR4A2|OTX1|PBX1|PITX2|PLAGL1|POU3F2|POU4F3|PPARG|RREB1|RXRB|SNCA|T|TAL1|TBX15|TFAP2A|TNF|TP73|WNT5A|ZIC1|ZNF148|ZBTB17|PRDM2|PAX8|KLF11|KLF7|NR1I2|PHOX2B|TAF1B|TBX18|LRRFIP1|…
GO:0001067_regulatory region nucleic acid binding	0.0378228	0.000180735	1.51713	70.2037	849	16505	1435	100	PARP1|BCL6|PRDM1|RUNX3|CDX1|ATF6B|NKX2-5|EN1|ENO1|ESR1|ESRRG|NR5A2|GBX2|GLI2|HIVEP1|HIVEP2|ZBTB48|HMGA1|HOXD3|HOXD4|HOXD8|HOXD9|HOXD10|HOXD13|HES1|IRF4|IRF6|ISL1|JARID2|JUN|MXD1|MEIS1|MSX1|MSX2|MYCN|NEUROG1|NFIA|NKX6-1|NPAS2|NR4A2|OTX1|PBX1|PITX2|PLAGL1|POU3F2|POU4F3|PPARG|RREB1|RXRB|SNCA|T|TAL1|TBX15|TFAP2A|TNF|TP73|WNT5A|ZIC1|ZNF148|ZBTB17|PRDM2|PAX8|KLF11|KLF7|NR1I2|PHOX2B|TAF1B|TBX18|LRRFIP1|…
GO:0000977_RNA polymerase II regulatory region sequence-specific DNA binding	0.0418135	0.000208886	1.60809	50.5235	611	16743	1435	76	PARP1|BCL6|PRDM1|RUNX3|CDX1|ATF6B|NKX2-5|EN1|ENO1|ESR1|ESRRG|NR5A2|GBX2|GLI2|HIVEP1|HOXD3|HOXD4|HOXD8|HOXD9|HOXD10|HOXD13|IRF4|ISL1|JARID2|JUN|MXD1|MEIS1|MSX1|MSX2|MYCN|NFIA|NKX6-1|NR4A2|OTX1|PBX1|PITX2|PLAGL1|POU3F2|POU4F3|RREB1|RXRB|T|TAL1|TBX15|TFAP2A|TP73|ZIC1|ZNF148|ZBTB17|PRDM2|PAX8|KLF7|NR1I2|PHOX2B|LRRFIP1|HAND2|TBPL1|H2AFY|TBR1|SSBP3|VAX2|HEYL|FOXD3|KCNIP3|ZBTB7B|KLF3|ETV7|BCL11A|BACH2|N…
GO:0001012_RNA polymerase II regulatory region DNA binding	0.043579	0.000231138	1.60189	50.6889	613	16741	1435	76	PARP1|BCL6|PRDM1|RUNX3|CDX1|ATF6B|NKX2-5|EN1|ENO1|ESR1|ESRRG|NR5A2|GBX2|GLI2|HIVEP1|HOXD3|HOXD4|HOXD8|HOXD9|HOXD10|HOXD13|IRF4|ISL1|JARID2|JUN|MXD1|MEIS1|MSX1|MSX2|MYCN|NFIA|NKX6-1|NR4A2|OTX1|PBX1|PITX2|PLAGL1|POU3F2|POU4F3|RREB1|RXRB|T|TAL1|TBX15|TFAP2A|TP73|ZIC1|ZNF148|ZBTB17|PRDM2|PAX8|KLF7|NR1I2|PHOX2B|LRRFIP1|HAND2|TBPL1|H2AFY|TBR1|SSBP3|VAX2|HEYL|FOXD3|KCNIP3|ZBTB7B|KLF3|ETV7|BCL11A|BACH2|N…
GO:0043168_anion binding	0.043579	0.000244026	1.2905	223.593	2704	14650	1435	271	ABCA4|ACTA1|ACTN2|ADCY3|ADCY5|AGER|ALAS1|ALK|AOX1|RHOA|ATP2B4|ATP6V1B1|ATR|DDR1|CAMK4|CAMK2A|CASR|RUNX3|CDK11B|CLCN6|CLK2|CNGA3|CRYZ|DGKG|DGKQ|DARS|DHX15|DHFR|DPYD|DTYMK|EEF1A1|EPB41|EPHA3|EPHA4|EPHA8|EPHB2|FABP1|FGFR3|FGFR4|FGR|FLT4|NR5A2|GAD1|GAK|GK2|GLRA1|GMDS|GNAI2|GNL1|GPC1|GRK4|GRK6|GUCY1B3|GUK1|HIST1H1A|UBE2K|HK3|HMGCR|HSPA1A|HSPA1L|HSPA6|HSP90AB1|ID3|ING2|INSRR|ITGA2|ITPKB|ITPR3|KIF5C|KIF…
GO:0044212_transcription regulatory region DNA binding	0.043579	0.000246102	1.50505	69.9556	846	16508	1435	99	PARP1|BCL6|PRDM1|RUNX3|CDX1|ATF6B|NKX2-5|EN1|ENO1|ESR1|ESRRG|NR5A2|GBX2|GLI2|HIVEP1|HIVEP2|ZBTB48|HMGA1|HOXD3|HOXD4|HOXD8|HOXD9|HOXD10|HOXD13|HES1|IRF4|ISL1|JARID2|JUN|MXD1|MEIS1|MSX1|MSX2|MYCN|NEUROG1|NFIA|NKX6-1|NPAS2|NR4A2|OTX1|PBX1|PITX2|PLAGL1|POU3F2|POU4F3|PPARG|RREB1|RXRB|SNCA|T|TAL1|TBX15|TFAP2A|TNF|TP73|WNT5A|ZIC1|ZNF148|ZBTB17|PRDM2|PAX8|KLF11|KLF7|NR1I2|PHOX2B|TAF1B|TBX18|LRRFIP1|HAND2…

## Sheet: enrich.KEGG
gene.set	fdr	p	odds	expected	numW	numB	numDrawn	numWdrawn	Wdrawn
hsa05322_Systemic lupus erythematosus	4.2264e-05	1.32906e-07	3.33915	11.8967	133	7212	657	32	C2|C4A|C4B|HIST3H2A|H2AFY|HIST1H2AM|HIST1H2AG|HIST1H2AK|HIST1H2AI|HIST1H2AL|HIST1H2BN|HIST2H2BF|HIST1H2BO|HIST1H2BL|HIST1H2BI|HIST1H2BJ|HIST1H2BK|HIST3H2BB|HIST1H3C|HIST1H3A|HIST2H3D|HIST1H3E|HIST1H3I|HIST1H4I|HIST1H4F|HIST1H4K|HIST1H4L|HIST1H4A|HLA-DOA|HLA-DRA|CD80|TNF
hsa05034_Alcoholism	0.000159732	1.0046e-06	2.73139	16.1007	180	7165	657	37	SLC6A3|HDAC3|HDAC4|HDAC11|HIST3H2A|H2AFY|HIST1H2AM|HIST1H2AG|HIST1H2AK|HIST1H2AI|HIST1H2AL|HIST1H2BN|HIST2H2BF|HIST1H2BO|HIST1H2BL|HIST1H2BI|HIST1H2BJ|HIST1H2BK|HIST3H2BB|HIST1H3C|HIST1H3A|HIST2H3D|HIST1H3E|HIST1H3I|HIST1H4I|HIST1H4F|HIST1H4K|HIST1H4L|HIST1H4A|HAT1|GNAI2|GNG4|ADCY5|ATF6B|CALML6|CAMK4|SLC29A1
hsa00053_Ascorbate and aldarate metabolism	0.00670187	6.32252e-05	6.0651	2.41511	27	7318	657	10	UGDH|UGT1A6|UGT1A4|UGT1A3|UGT1A9|UGT1A10|UGT1A8|UGT1A5|UGT1A7|ALDH7A1
hsa00040_Pentose and glucuronate interconversions	0.0438932	0.000552116	4.2916	3.04125	34	7311	657	10	UGT1A6|UGT1A4|UGT1A3|UGT1A9|UGT1A10|UGT1A8|UGT1A5|UGT1A7|UGDH|UGP2
